# Supplementary material for: Allele Frequency–Based and Polymorphism-Versus-Divergence Indices of Balancing Selection in a New Filtered Set of Polymorphic Genes in Plasmodium falciparum
Source: PubMed Central journal article supplement — Mol Biol Evol. 2010 May 9;27(10):2344–51. doi: 10.1093/molbev/msq119 (PMC2944029; doi:10.1093/molbev/msq119), 2010-05-09
Supplement: supp_msq119_SupplementaryFig_S2.pdf [file supp_msq119_SupplementaryFig_S2.pdf]

|                                     | 170       | 180        | 190        | 200        | 210        | 220        | 230        | 240        |
|-------------------------------------|-----------|------------|------------|------------|------------|------------|------------|------------|
| PFD0100c_3D7_exon1                  | TTAATTATT | TATTGATGAT | ATGAAAGATG | AGTTTCTCAC | GTCTTCATTA | ATACGTCTCC | CCAAAAAATT | AAGAAAGCAA |
| PFD0100c_exon1_Kilifi_062           | .....     | .....      | .....      | .....      | .....      | .....      | .....      | .....      |
| PFD0100c_exon1_Kilifi_091           | .....     | .....      | .....      | .....      | .....      | .....      | .....      | .....      |
| PFD0100c_exon1_Kilifi_250           | .....     | .....      | .....      | .....      | .....      | .....      | .T...G     | .....      |
| PFD0100c_exon1_Kilifi_314           | .....     | .....      | .....      | .....      | .....      | .....      | .T...G     | .....      |
| PFD0100c_exon1_Kilifi_093           | .....     | .....      | .....      | .....      | .....      | .....      | .T         | .....      |
| PFD0100c_exon1_Kilifi_128           | .....     | .....      | .....      | .....      | .....      | .....      | .T         | .....      |
| PFD0100c_exon1_Kilifi_186           | .....     | .....      | .....      | .....      | .....      | .....      | .....      | .....      |
| PFD0100c_exon1_Kilifi_345           | .....     | .....      | .....      | .....      | .....      | .....      | .....      | .....      |
| PFD0100c_exon1_Kilifi_202           | .....     | .....      | .....      | .....      | .....      | .....      | .....      | .....      |
| PFD0100c_exon1_Kilifi_290           | .....     | .....      | .....      | .....      | .....      | .....      | .T         | .....      |
| PFD0100c_exon1_Kilifi_304           | .....     | .....      | .....      | .....      | .....      | .....      | .....      | .....      |
| PFD0100c_exon1_Kilifi_299           | .....     | .....      | .....      | .....      | .....      | .....      | .T         | .....      |
| PFD0100c_exon1_Kilifi_082           | .....     | .....      | .....      | .....      | .....      | .....      | .....      | .....      |
| PFD0100c_exon1_Kilifi_334           | .....     | .....      | .....      | .....      | .....      | .....      | .....      | .....      |
| PFD0100c_exon1_Kilifi_298           | .....     | .....      | .....      | .....      | .....      | .....      | .T         | .....      |
| PFD0100c_exon1_Kilifi_105           | .....     | .....      | .....      | .....      | .....      | .....      | .....      | .....      |
| PFD0100c_exon1_Kilifi_406           | .....     | .....      | .....      | .....      | .....      | .....      | .T         | .....      |
| PFD0100c_exon1_Kilifi_510           | .....     | .....      | .....      | .....      | .....      | .....      | .T         | .....      |
| PFD0100c_exon1_Kilifi_164           | .....     | .....      | .....      | .....      | .....      | .....      | .....      | .....      |
| PFD0100c_exon1_Kilifi_321           | .....     | .....      | .....      | .....      | .....      | .....      | .T         | .....      |
| PFD0100c_exon1_Kilifi_050           | .....     | .....      | .....      | .....      | .....      | .....      | .....      | .....      |
| PFD0100c_exon1_Kilifi_344           | .....     | .....      | .....      | .....      | .....      | .....      | .T         | .....      |
| PFD0100c_exon1_Kilifi_240           | .....     | .....      | .....      | .....      | .....      | .....      | .T         | .....      |
| PFD0100c_exon1_Kilifi_028           | .....     | .....      | .....      | .....      | .....      | .....      | .....      | .....      |
| PFD0100c_exon1_Kilifi_356           | .....     | .....      | .....      | .....      | .....      | .....      | .T         | .....      |
| PFD0100c_exon1_Kilifi_528           | .....     | .....      | .....      | .....      | .....      | .....      | .T         | .....      |
| PFD0100c_exon1_Kilifi_364           | .....     | .....      | .....      | .....      | .....      | .....      | .....      | .....      |
| PFD0100c_exon1_Kilifi_057           | .....     | .....      | .....      | .....      | .....      | .....      | .T         | .....      |
| PFD0100c_exon1_Kilifi_194           | .....     | .....      | .....      | .....      | .....      | .....      | .T         | .....      |
| PFD0100c_exon1_Kilifi_045           | .....     | .....      | .....      | .....      | .....      | .....      | .T         | .....      |
| PFD0100c_exon1_Kilifi_214           | .....     | .....      | .....      | .....      | .....      | .....      | .T         | .....      |
| PFD0100c_exon1_Kilifi_020           | .....     | .....      | .....      | .....      | .....      | .....      | .T...G     | .....      |
| PFD0100c_exon1_Kilifi_023           | .....     | .....      | .....      | .....      | .....      | .....      | .T         | .....      |
| PFD0100c_exon1_Kilifi_052           | .....     | .....      | .....      | .....      | .....      | .....      | .T         | .....      |
| PFD0100c_exon1_Kilifi_340           | .....     | .....      | .....      | .....      | .....      | .....      | .T         | .....      |
| PFD0100c_exon1_Kilifi_027           | .....     | .....      | .....      | .....      | .....      | .....      | .T...G     | .....      |
| PFD0100c_exon1_Kilifi_097           | .....     | .....      | .....      | .....      | .....      | .....      | .T         | .....      |
| PFD0100c_exon1_Kilifi_187           | .....     | .....      | .....      | .....      | .....      | .....      | .T...G     | .....      |
| PFD0100c_exon1_Kilifi_201           | .....     | .....      | .....      | .....      | .....      | .....      | .....      | .....      |
| PFD0100c_exon1_Kilifi_310           | .....     | .....      | .....      | .....      | .....      | .....      | .T         | .....      |
| PFD0100c_exon1_Kilifi_302           | .....     | .....      | .....      | .....      | .....      | .....      | .....      | .....      |
| PFD0100c_exon1_Kilifi_324           | .....     | .....      | .....      | .....      | .....      | .....      | .....      | .....      |
| PFD0100c_exon1_Kilifi_333           | .....     | .....      | .....      | .....      | .....      | .....      | .T         | .....      |
| PFD0100c_exon1_Kilifi_311           | .....     | .....      | .....      | .....      | .....      | .....      | .....      | .....      |
| PFD0100c_exon1_Kilifi_297           | .....     | .....      | .....      | .....      | .....      | .....      | .....      | .....      |
| PFD0100c_exon1_Kilifi_319           | .....     | .....      | .....      | .....      | .....      | .....      | .....      | .....      |
| PFD0100c_exon1_Kilifi_289           | .....     | .....      | .....      | .....      | .....      | .....      | .....      | .....      |
| PFD0100c_exon1_Kilifi_247           | .....     | .....      | .....      | .....      | .....      | .....      | .....      | .....      |
| PFD0100c_exon1_Kilifi_110           | .....     | .....      | .....      | .....      | .....      | .....      | .....      | .....      |
| PFD0100c_exon1_Kilifi_348           | .....     | .....      | .....      | .....      | .....      | .....      | .T...G     | .....      |
| PFD0100c_exon1_Kilifi_124           | .....     | .....      | .....      | .....      | .....      | .....      | .....      | .....      |
| <i>Plasmodium reichenowi</i> _exon1 | .....     | .....      | .....      | ...C..T..  | .A..AA..CG | ...A.....T | .TCC.G     | .....      |

|                                     | 250        | 260        | 270         | 280        | 290        | 300        | 310         | 320        |
|-------------------------------------|------------|------------|-------------|------------|------------|------------|-------------|------------|
| PFD0100c_3D7_exon1                  | TTATGGGAAA | GTGAAGTTGA | TGAAAATTTA  | CCAAATTTAA | TGGCTACAAC | TACACATAAT | AAGTGTCTAA  | GAACAGAACA |
| PFD0100c_exon1_Kilifi_062           | .....      | .....      | .....C..... | .....      | .....      | .....      | .....A..... | .....      |
| PFD0100c_exon1_Kilifi_091           | .....      | .....      | .....C..... | .....      | .....      | .....      | .....A..... | .....      |
| PFD0100c_exon1_Kilifi_250           | .....      | .....      | .....C..... | .....      | .....      | .....      | .....A..... | .....      |
| PFD0100c_exon1_Kilifi_314           | .....      | A.....     | .A...C...   | .....      | .....      | .....      | .....A..... | .....      |
| PFD0100c_exon1_Kilifi_093           | .....      | .....      | .....C..... | .....      | .....      | .....      | .....A..... | .....      |
| PFD0100c_exon1_Kilifi_128           | .....      | .....      | .....C..... | .....      | .....      | .....      | .....A..... | .....      |
| PFD0100c_exon1_Kilifi_186           | .....      | .....      | .....C..... | .....      | .....      | .....      | .....A..... | .....      |
| PFD0100c_exon1_Kilifi_345           | .....      | .....      | .....C..... | .....      | .....      | .....      | .....A..... | .....      |
| PFD0100c_exon1_Kilifi_202           | .....      | .....      | .....C..... | .....      | .....      | .....      | .....A..... | .....      |
| PFD0100c_exon1_Kilifi_290           | .....      | .....      | .....C..... | .....      | .....      | .....      | .....A..... | .....      |
| PFD0100c_exon1_Kilifi_304           | .....      | .....      | .....C..... | .....      | .....      | .....      | .....A..... | .....      |
| PFD0100c_exon1_Kilifi_299           | .....      | .....      | .....C..... | .....      | .....      | .....      | .....A..... | .....      |
| PFD0100c_exon1_Kilifi_082           | .....      | .....      | .....C..... | .....      | .....      | .....      | .....A..... | .....      |
| PFD0100c_exon1_Kilifi_334           | .....      | .....      | .....C..... | .....      | .....      | .....      | .....A..... | .....      |
| PFD0100c_exon1_Kilifi_298           | .....      | .....      | .....C..... | .....      | .....      | .....      | .....A..... | .....      |
| PFD0100c_exon1_Kilifi_105           | .....      | .....      | .A...C...   | .....      | .....      | .....      | .....A..... | .....      |
| PFD0100c_exon1_Kilifi_406           | .....      | .....      | .....C..... | .....      | .....      | .....      | .....A..... | .....      |
| PFD0100c_exon1_Kilifi_510           | .....      | .....      | .....C..... | .....      | .....      | .....      | .....A..... | .....      |
| PFD0100c_exon1_Kilifi_164           | .....      | A.....     | .A...C...   | .....      | .....      | .....      | .....A..... | .....      |
| PFD0100c_exon1_Kilifi_321           | .....      | .....      | .....C..... | .....      | .....      | .....      | .....A..... | .....      |
| PFD0100c_exon1_Kilifi_050           | .....      | .....      | .....C..... | .....      | .....      | .....      | .....A..... | .....      |
| PFD0100c_exon1_Kilifi_344           | .....      | .....      | .....C..... | .....      | .....      | .....      | .....A..... | .....      |
| PFD0100c_exon1_Kilifi_240           | .....      | .....      | .....C..... | .....      | .....      | .....      | .....A..... | .....      |
| PFD0100c_exon1_Kilifi_028           | .....      | .....      | .....C..... | .....      | .....      | .....      | .....A..... | .....      |
| PFD0100c_exon1_Kilifi_356           | .....      | .....      | .....C..... | .....      | .....      | .....      | .....A..... | .....      |
| PFD0100c_exon1_Kilifi_528           | .....      | .....      | .....C..... | .....      | .....      | .....      | .....A..... | .....      |
| PFD0100c_exon1_Kilifi_364           | .....      | .....      | .....C..... | .....      | .....      | .....      | .....A..... | .....      |
| PFD0100c_exon1_Kilifi_057           | .....      | .....      | .....C..... | .....      | .....      | .....      | .....A..... | .....      |
| PFD0100c_exon1_Kilifi_194           | .....      | .....      | .....C..... | .....      | .....      | .....      | .....A..... | .....      |
| PFD0100c_exon1_Kilifi_045           | .....      | .....      | .....C..... | .....      | .....      | .....      | .....A..... | .....      |
| PFD0100c_exon1_Kilifi_214           | .....      | .....      | .....C..... | .....      | .....      | .....      | .....A..... | .....      |
| PFD0100c_exon1_Kilifi_020           | .....      | A.....     | .A...C...   | .....      | .....      | .....      | .....A..... | .....      |
| PFD0100c_exon1_Kilifi_023           | .....      | .....      | .....C..... | .....      | .....      | .....      | .....A..... | .....      |
| PFD0100c_exon1_Kilifi_052           | .....      | .....      | .....C..... | .....      | .....      | .....      | .....A..... | .....      |
| PFD0100c_exon1_Kilifi_340           | .....      | .....      | .....C..... | .....      | .....      | .....      | .....A..... | .....      |
| PFD0100c_exon1_Kilifi_027           | .....      | A.....     | .A...C...   | .....      | .....      | .....      | .....A..... | .....      |
| PFD0100c_exon1_Kilifi_097           | .....      | .....      | .A...C...   | .....      | .....      | .....      | .....A..... | .....      |
| PFD0100c_exon1_Kilifi_187           | .....      | A.....     | .A...C...   | .....      | .....      | .....      | .....A..... | .....      |
| PFD0100c_exon1_Kilifi_201           | .....      | .....      | .A...C...   | .....      | .....      | .....      | .....A..... | .....      |
| PFD0100c_exon1_Kilifi_310           | .....      | .....      | .....C..... | .....      | .....      | .....      | .....A..... | .....      |
| PFD0100c_exon1_Kilifi_302           | .....      | .....      | .....C..... | .....      | .....      | .....      | .....A..... | .....      |
| PFD0100c_exon1_Kilifi_324           | .....      | .....      | .....C..... | .....      | .....      | .....      | .....A..... | .....      |
| PFD0100c_exon1_Kilifi_333           | .....      | .....      | .....C..... | .....      | .....      | .....      | .....A..... | .....      |
| PFD0100c_exon1_Kilifi_311           | .....      | .....      | .....C..... | .....      | .....      | .....      | .....A..... | .....      |
| PFD0100c_exon1_Kilifi_297           | .....      | .....      | .....C..... | .....      | .....      | .....      | .....A..... | .....      |
| PFD0100c_exon1_Kilifi_319           | .....      | .....      | .....C..... | .....      | .....      | .....      | .....A..... | .....      |
| PFD0100c_exon1_Kilifi_289           | .....      | .....      | .....C..... | .....      | .....      | .....      | .....A..... | .....      |
| PFD0100c_exon1_Kilifi_247           | .....      | .....      | .....C..... | .....      | .....      | .....      | .....A..... | .....      |
| PFD0100c_exon1_Kilifi_110           | .....      | .....      | .....C..... | .....      | .....      | .....      | .....A..... | .....      |
| PFD0100c_exon1_Kilifi_348           | .....      | A.....     | .A...C...   | .....      | .....      | .....      | .....A..... | .....      |
| PFD0100c_exon1_Kilifi_124           | .....      | .....      | .....C..... | .....      | .....      | .....      | .....A..... | .....      |
| <i>Plasmodium reichenowi</i> _exon1 | .....      | .....      | .A.....     | ..C..AC.T. | AT.G..G..G | .....      | .....A..... | .....      |





|                                     | 490         | 500         | 510         | 520        | 530        | 540        | 550        | 560         |
|-------------------------------------|-------------|-------------|-------------|------------|------------|------------|------------|-------------|
| PFD0100c_3D7_exon1                  | CAAATGAATA  | AATTAGATAT  | TTCAAAAATA  | AAACAATATT | TGGAAAAGTC | AAAGTCAAAA | TGTGATATAA | ATGATTTAGA  |
| PFD0100c_exon1_Kilifi_062           | .....       | .....       | .....       | .....      | .....      | .....      | .....      | .....       |
| PFD0100c_exon1_Kilifi_091           | .....       | .....       | .....       | .....      | .....      | .....      | .....      | .....       |
| PFD0100c_exon1_Kilifi_250           | .....G..... | .....       | .....       | .....      | .....      | .....      | .....      | .....       |
| PFD0100c_exon1_Kilifi_314           | .....G..... | .....       | .....       | .....      | .....      | .....      | .....      | .....       |
| PFD0100c_exon1_Kilifi_093           | .....G..... | .....       | .....       | .....      | .....      | .....      | .....      | .....       |
| PFD0100c_exon1_Kilifi_128           | .....       | .....       | .....       | .....      | .....      | .....      | .....      | .....       |
| PFD0100c_exon1_Kilifi_186           | .....       | .....       | .....       | .....      | .....      | .....      | .....      | .....       |
| PFD0100c_exon1_Kilifi_345           | .....G..... | .....       | .....       | .....      | .....      | .....      | .....      | .....       |
| PFD0100c_exon1_Kilifi_202           | .....       | .....       | .....       | .....      | .....      | .....      | .....      | .....       |
| PFD0100c_exon1_Kilifi_290           | .....       | .....       | .....       | .....      | .....      | .....      | .....      | .....       |
| PFD0100c_exon1_Kilifi_304           | .....       | .....       | .....       | .....      | .....      | .....      | .....      | .....       |
| PFD0100c_exon1_Kilifi_299           | .....       | .....       | .....       | .....      | .....      | .....      | .....      | .....       |
| PFD0100c_exon1_Kilifi_082           | .....G..... | .....       | .....       | .....      | .....      | .....      | .....      | .....       |
| PFD0100c_exon1_Kilifi_334           | .....       | .....       | .....       | .....      | .....      | .....      | .....      | .....       |
| PFD0100c_exon1_Kilifi_298           | .....       | .....       | .....       | .....      | .....      | .....      | .....      | .....       |
| PFD0100c_exon1_Kilifi_105           | .....       | .....       | .....       | .....      | .....      | .....      | .....      | .....       |
| PFD0100c_exon1_Kilifi_406           | .....       | .....       | .....       | .....      | .....      | .....      | .....      | .....       |
| PFD0100c_exon1_Kilifi_510           | .....G..... | .....       | .....       | .....      | .....      | .....      | .....      | .....T..... |
| PFD0100c_exon1_Kilifi_164           | .....       | .....       | .....       | .....      | .....      | .....      | .....      | .....       |
| PFD0100c_exon1_Kilifi_321           | .....G..... | .....       | .....       | .....      | .....      | .....      | .....      | .....       |
| PFD0100c_exon1_Kilifi_050           | .....G..... | .....       | .....       | .....      | .....      | .....      | .....      | .....       |
| PFD0100c_exon1_Kilifi_344           | .....G..... | .....       | .....       | .....      | .....      | .....      | .....      | .....       |
| PFD0100c_exon1_Kilifi_240           | .....G..... | .....       | .....       | .....      | .....      | .....      | .....      | .....       |
| PFD0100c_exon1_Kilifi_028           | .....       | .....       | .....       | .....      | .....      | .....      | .....      | .....       |
| PFD0100c_exon1_Kilifi_356           | .....       | .....       | .....       | .....      | .....      | .....      | .....      | .....       |
| PFD0100c_exon1_Kilifi_528           | .....       | .....       | .....       | .....      | .....      | .....      | .....      | .....       |
| PFD0100c_exon1_Kilifi_364           | .....G..... | .....       | .....       | .....      | .....      | .....      | .....      | .....T..... |
| PFD0100c_exon1_Kilifi_057           | .....       | .....       | .....       | .....      | .....      | .....      | .....      | .....       |
| PFD0100c_exon1_Kilifi_194           | .....       | .....       | .....       | .....      | .....      | .....      | .....      | .....       |
| PFD0100c_exon1_Kilifi_045           | .....       | .....       | .....       | .....      | .....      | .....      | .....      | .....       |
| PFD0100c_exon1_Kilifi_214           | .....G..... | .....       | .....       | .....      | .....      | .....      | .....      | .....       |
| PFD0100c_exon1_Kilifi_020           | .....       | .....       | .....       | .....      | .....      | .....      | .....      | .....       |
| PFD0100c_exon1_Kilifi_023           | .....       | .....       | .....       | .....      | .....      | .....      | .....      | .....       |
| PFD0100c_exon1_Kilifi_052           | .....       | .....       | .....       | .....      | .....      | .....      | .....      | .....       |
| PFD0100c_exon1_Kilifi_340           | .....G..... | .....       | .....       | .....      | .....      | .....      | .....      | .....       |
| PFD0100c_exon1_Kilifi_027           | .....G..... | .....       | .....       | .....      | .....      | .....      | .....      | .....T..... |
| PFD0100c_exon1_Kilifi_097           | .....G..... | .....       | .....       | .....      | .....      | .....      | .....      | .....       |
| PFD0100c_exon1_Kilifi_187           | .....G..... | .....       | .....       | .....      | .....      | .....      | .....      | .....T..... |
| PFD0100c_exon1_Kilifi_201           | .....       | .....       | .....       | .....      | .....      | .....      | .....      | .....       |
| PFD0100c_exon1_Kilifi_310           | .....       | .....       | .....       | .....      | .....      | .....      | .....      | .....       |
| PFD0100c_exon1_Kilifi_302           | .....G..... | .....       | .....       | .....      | .....      | .....      | .....      | .....       |
| PFD0100c_exon1_Kilifi_324           | .....       | .....       | .....       | .....      | .....      | .....      | .....      | .....       |
| PFD0100c_exon1_Kilifi_333           | .....G..... | .....       | .....       | .....      | .....      | .....      | .....      | .....       |
| PFD0100c_exon1_Kilifi_311           | .....G..... | .....       | .....       | .....      | .....      | .....      | .....      | .....T..... |
| PFD0100c_exon1_Kilifi_297           | .....G..... | .....       | .....       | .....      | .....      | .....      | .....      | .....       |
| PFD0100c_exon1_Kilifi_319           | .....G..... | .....       | .....       | .....      | .....      | .....      | .....      | .....       |
| PFD0100c_exon1_Kilifi_289           | .....       | .....       | .....       | .....      | .....      | .....      | .....      | .....       |
| PFD0100c_exon1_Kilifi_247           | .....G..... | .....       | .....       | .....      | .....      | .....      | .....      | .....       |
| PFD0100c_exon1_Kilifi_110           | .....G..... | .....       | .....       | .....      | .....      | .....      | .....      | .....T..... |
| PFD0100c_exon1_Kilifi_348           | .....       | .....       | .....       | .....      | .....      | .....      | .....      | .....T..... |
| PFD0100c_exon1_Kilifi_124           | .....       | .....       | .....       | .....      | .....      | .....      | .....      | .....       |
| <i>Plasmodium reichenowi</i> _exon1 | A.....      | .....C..... | .....G..... | .....      | .....      | .....      | .....      | .....T..... |

|                                     | 570        | 580        | 590         | 600        | 610        | 620        | 630        | 640        |
|-------------------------------------|------------|------------|-------------|------------|------------|------------|------------|------------|
| PFD0100c_3D7_exon1                  | TAATTTAGAT | ACATTTTTTT | CCCATGTAAA  | TCCAAAAGAT | ATGAAGGGAA | GTGAAGAGGA | TCCAAGAAAT | CCTCAGGAAG |
| PFD0100c_exon1_Kilifi_062           | .....      | .....      | .....       | .....      | .....      | .....      | .....      | .....      |
| PFD0100c_exon1_Kilifi_091           | .....      | .....      | .....       | .....      | .....      | .....      | .....      | .....      |
| PFD0100c_exon1_Kilifi_250           | .....      | .....      | .....       | .....      | .....      | .....      | .....      | .....      |
| PFD0100c_exon1_Kilifi_314           | .....      | .....      | .....       | .....      | .....      | .....      | .....      | .....      |
| PFD0100c_exon1_Kilifi_093           | .....      | .....      | .....       | .....      | .....      | .....      | .....      | .....      |
| PFD0100c_exon1_Kilifi_128           | .....      | .....      | .....       | .....      | .....      | .....      | .....      | .....      |
| PFD0100c_exon1_Kilifi_186           | .....      | .....      | .....       | .....      | .....      | .....      | .....      | .....      |
| PFD0100c_exon1_Kilifi_345           | .....      | .....      | .....       | .....      | .....      | .....      | .....      | .....      |
| PFD0100c_exon1_Kilifi_202           | .....      | .....      | .....       | .....      | .....      | .....      | .....      | .....      |
| PFD0100c_exon1_Kilifi_290           | .....      | .....      | .....       | .....      | .....      | .....      | .....      | .....      |
| PFD0100c_exon1_Kilifi_304           | .....      | .....      | .....       | .....      | .....      | .....      | .....      | .....      |
| PFD0100c_exon1_Kilifi_299           | .....      | .....      | .....       | .....      | .....      | .....      | .....      | .....      |
| PFD0100c_exon1_Kilifi_082           | .....      | .....      | .....       | .....      | .....      | .....      | .....      | .....      |
| PFD0100c_exon1_Kilifi_334           | .....      | .....      | .....       | .....      | .....      | .....      | .....      | .....      |
| PFD0100c_exon1_Kilifi_298           | .....      | .....      | .....       | .....      | .....      | .....      | .....      | .....      |
| PFD0100c_exon1_Kilifi_105           | .....      | .....      | .....       | .....      | .....      | .....      | .....      | .....      |
| PFD0100c_exon1_Kilifi_406           | .....      | .....      | .....       | .....      | .....      | .....      | .....      | .....      |
| PFD0100c_exon1_Kilifi_510           | .....      | .....      | .....       | T.....     | .....      | .....      | A.....     | .....      |
| PFD0100c_exon1_Kilifi_164           | .....      | .....      | .....       | .....      | .....      | .....      | .....      | .....      |
| PFD0100c_exon1_Kilifi_321           | .....      | .....      | .....       | .....      | .....      | .....      | .....      | .....      |
| PFD0100c_exon1_Kilifi_050           | .....      | .....      | .....       | .....      | .....      | .....      | .....      | .....      |
| PFD0100c_exon1_Kilifi_344           | .....      | .....      | .....       | .....      | .....      | .....      | .....      | .....      |
| PFD0100c_exon1_Kilifi_240           | .....      | .....      | .....       | .....      | .....      | .....      | .....      | .....      |
| PFD0100c_exon1_Kilifi_028           | .....      | .....      | .....       | .....      | .....      | .....      | .....      | .....      |
| PFD0100c_exon1_Kilifi_356           | .....      | .....      | .....       | .....      | .....      | .....      | A.....     | .....      |
| PFD0100c_exon1_Kilifi_528           | .....      | .....      | .....       | T.....     | .....      | .....      | .....      | .....      |
| PFD0100c_exon1_Kilifi_364           | .....      | .....      | .....       | .....      | .....      | .....      | .....      | .....      |
| PFD0100c_exon1_Kilifi_057           | .....      | .....      | .....       | .....      | .....      | .....      | .....      | .....      |
| PFD0100c_exon1_Kilifi_194           | .....      | .....      | .....       | .....      | .....      | .....      | .....      | .....      |
| PFD0100c_exon1_Kilifi_045           | .....      | .....      | .....       | .....      | .....      | .....      | .....      | .....      |
| PFD0100c_exon1_Kilifi_214           | .....      | .....      | .....       | .....      | .....      | .....      | .....      | .....      |
| PFD0100c_exon1_Kilifi_020           | .....      | .....      | .....       | .....      | .....      | .....      | .....      | .....      |
| PFD0100c_exon1_Kilifi_023           | .....      | .....      | .....       | .....      | .....      | .....      | .....      | .....      |
| PFD0100c_exon1_Kilifi_052           | .....      | .....      | .....       | .....      | .....      | .....      | .....      | .....      |
| PFD0100c_exon1_Kilifi_340           | .....      | .....      | .....       | .....      | .....      | .....      | .....      | .....      |
| PFD0100c_exon1_Kilifi_027           | .....      | .....      | .....       | T.....     | .....      | .....      | .....      | .....      |
| PFD0100c_exon1_Kilifi_097           | .....      | .....      | .....       | .....      | .....      | .....      | .....      | .....      |
| PFD0100c_exon1_Kilifi_187           | .....      | .....      | .....       | T.....     | .....      | .....      | A.....     | .....      |
| PFD0100c_exon1_Kilifi_201           | .....      | .....      | .....       | .....      | .....      | .....      | .....      | .....      |
| PFD0100c_exon1_Kilifi_310           | .....      | .....      | .....       | .....      | .....      | .....      | .....      | .....      |
| PFD0100c_exon1_Kilifi_302           | .....      | .....      | .....       | .....      | .....      | .....      | .....      | .....      |
| PFD0100c_exon1_Kilifi_324           | .....      | .....      | .....       | .....      | .....      | .....      | .....      | .....      |
| PFD0100c_exon1_Kilifi_333           | .....      | .....      | .....       | .....      | .....      | .....      | .....      | .....      |
| PFD0100c_exon1_Kilifi_311           | .....      | .....      | .....       | T.....     | .....      | .....      | A.....     | .....      |
| PFD0100c_exon1_Kilifi_297           | .....      | .....      | .....       | .....      | .....      | .....      | .....      | .....      |
| PFD0100c_exon1_Kilifi_319           | .....      | .....      | .....       | .....      | .....      | .....      | .....      | .....      |
| PFD0100c_exon1_Kilifi_289           | .....      | .....      | .....       | .....      | .....      | .....      | .....      | .....      |
| PFD0100c_exon1_Kilifi_247           | .....      | .....      | .....       | .....      | .....      | .....      | .....      | .....      |
| PFD0100c_exon1_Kilifi_110           | .....      | .....      | .....       | T.....     | .....      | .....      | A.....     | .....      |
| PFD0100c_exon1_Kilifi_348           | .....      | .....      | .....       | T.....     | .....      | .....      | .....      | .....      |
| PFD0100c_exon1_Kilifi_124           | .....      | .....      | .....       | .....      | .....      | .....      | .....      | .....      |
| <i>Plasmodium reichenowi</i> _exon1 | .....      | .....      | .....G..... | .....      | .....      | .....      | .....      | A.....     |



|                                     | 650        | 660         | 670           | 680         | 690        | 700         | 710         | 720         |
|-------------------------------------|------------|-------------|---------------|-------------|------------|-------------|-------------|-------------|
| PFD0100c_3D7_exon1                  | AAGAGCACAA | AAGAGATGAA  | TATCAAGTTT    | TAAATAGTAC  | AGTTGAAGAA | GGTGATGAAT  | ATGTTGATAG  | AATAAATATC  |
| PFD0100c_exon1_Kilifi_062           | .....      | .....       | .....         | .....       | .....      | .....       | .....       | .....       |
| PFD0100c_exon1_Kilifi_091           | .....      | .....       | .....         | .....       | .....      | .....       | .....       | .....       |
| PFD0100c_exon1_Kilifi_250           | .....      | .....       | .....         | .....       | .....      | .....       | .....       | .....       |
| PFD0100c_exon1_Kilifi_314           | .....      | .....       | .....         | .....       | .....      | .....       | .....       | .....       |
| PFD0100c_exon1_Kilifi_093           | .....      | .....       | .....         | .....       | .....      | .....       | .....       | .....       |
| PFD0100c_exon1_Kilifi_128           | .....      | .....       | .....         | .....       | .....      | .....       | .....       | .....       |
| PFD0100c_exon1_Kilifi_186           | .....      | .....       | .....         | .....       | .....      | .....       | .....       | .....       |
| PFD0100c_exon1_Kilifi_345           | .....      | .....       | .....         | .....       | .....      | .....       | .....       | .....       |
| PFD0100c_exon1_Kilifi_202           | .....      | .....       | .....         | .....       | .....      | .....       | .....       | .....       |
| PFD0100c_exon1_Kilifi_290           | .....      | .....       | .....         | .....       | .....      | .....       | .....       | .....       |
| PFD0100c_exon1_Kilifi_304           | .....      | .....       | .....         | .....       | .....      | .....       | .....       | .....       |
| PFD0100c_exon1_Kilifi_299           | .....      | .....       | .....         | .....       | .....      | .....       | .....       | .....       |
| PFD0100c_exon1_Kilifi_082           | .....      | .....       | .....         | .....       | .....      | .....       | .....       | .....       |
| PFD0100c_exon1_Kilifi_334           | .....      | .....       | .....         | .....       | .....      | .....       | .....       | .....       |
| PFD0100c_exon1_Kilifi_298           | .....      | .....       | .....         | .....       | .....      | .....       | .....       | .....       |
| PFD0100c_exon1_Kilifi_105           | .....      | .....       | .....         | .....       | .....      | .....       | .....       | .....       |
| PFD0100c_exon1_Kilifi_406           | .....      | .....       | .....         | .....       | .....      | .....       | .....       | .....       |
| PFD0100c_exon1_Kilifi_510           | .....      | .....       | .....         | .....       | .....      | .....       | .....       | .....       |
| PFD0100c_exon1_Kilifi_164           | .....      | .....       | .....         | .....       | .....      | .....C..... | .....A..... | .....       |
| PFD0100c_exon1_Kilifi_321           | .....      | .....       | .....         | .....       | .....      | .....       | .....       | .....       |
| PFD0100c_exon1_Kilifi_050           | .....      | .....       | .....         | .....       | .....      | .....       | .....       | .....       |
| PFD0100c_exon1_Kilifi_344           | .....      | .....       | .....         | .....       | .....      | .....       | .....       | .....       |
| PFD0100c_exon1_Kilifi_240           | .....      | .....       | .....         | .....       | .....      | .....       | .....       | .....       |
| PFD0100c_exon1_Kilifi_028           | .....      | .....       | .....         | .....       | .....      | .....       | .....       | .....       |
| PFD0100c_exon1_Kilifi_356           | .....      | .....       | .....         | .....       | .....      | .....       | .....       | .....       |
| PFD0100c_exon1_Kilifi_528           | .....      | .....       | .....         | .....       | .....      | .....       | .....       | .....       |
| PFD0100c_exon1_Kilifi_364           | .....      | .....       | .....         | .....       | .....      | .....       | .....       | .....       |
| PFD0100c_exon1_Kilifi_057           | .....      | .....       | .....         | .....       | .....      | .....       | .....       | .....       |
| PFD0100c_exon1_Kilifi_194           | .....      | .....       | .....         | .....       | .....      | .....       | .....       | .....       |
| PFD0100c_exon1_Kilifi_045           | .....      | .....       | .....         | .....       | .....      | .....       | .....       | .....       |
| PFD0100c_exon1_Kilifi_214           | .....      | .....       | .....         | .....       | .....      | .....       | .....       | .....       |
| PFD0100c_exon1_Kilifi_020           | .....      | .....       | .....         | .....       | .....      | .....C..... | .....A..... | .....       |
| PFD0100c_exon1_Kilifi_023           | .....      | .....       | .....         | .....       | .....      | .....       | .....       | .....       |
| PFD0100c_exon1_Kilifi_052           | .....      | .....       | .....         | .....       | .....      | .....       | .....       | .....       |
| PFD0100c_exon1_Kilifi_340           | .....      | .....       | .....         | .....       | .....      | .....       | .....       | .....       |
| PFD0100c_exon1_Kilifi_027           | .....      | .....       | .....         | .....       | .....      | .....       | .....       | .....       |
| PFD0100c_exon1_Kilifi_097           | .....      | .....       | .....         | .....       | .....      | .....       | .....       | .....       |
| PFD0100c_exon1_Kilifi_187           | .....      | .....       | .....         | .....       | .....      | .....       | .....       | .....       |
| PFD0100c_exon1_Kilifi_201           | .....      | .....       | .....         | .....       | .....      | .....       | .....       | .....       |
| PFD0100c_exon1_Kilifi_310           | .....      | .....       | .....         | .....       | .....      | .....       | .....       | .....       |
| PFD0100c_exon1_Kilifi_302           | .....      | .....       | .....         | .....       | .....      | .....       | .....       | .....       |
| PFD0100c_exon1_Kilifi_324           | .....      | .....       | .....         | .....       | .....      | .....       | .....       | .....       |
| PFD0100c_exon1_Kilifi_333           | .....      | .....       | .....         | .....       | .....      | .....       | .....       | .....       |
| PFD0100c_exon1_Kilifi_311           | .....      | .....       | .....         | .....       | .....      | .....       | .....       | .....       |
| PFD0100c_exon1_Kilifi_297           | .....      | .....       | .....         | .....       | .....      | .....       | .....       | .....       |
| PFD0100c_exon1_Kilifi_319           | .....      | .....       | .....         | .....       | .....      | .....       | .....       | .....       |
| PFD0100c_exon1_Kilifi_289           | .....      | .....       | .....         | .....       | .....      | .....       | .....       | .....       |
| PFD0100c_exon1_Kilifi_247           | .....      | .....       | .....         | .....       | .....      | .....       | .....       | .....       |
| PFD0100c_exon1_Kilifi_110           | .....      | .....       | .....         | .....       | .....      | .....C..... | .....A..... | .....       |
| PFD0100c_exon1_Kilifi_348           | .....      | .....       | .....         | .....       | .....      | .....       | .....       | .....       |
| PFD0100c_exon1_Kilifi_124           | .....      | .....       | .....         | .....       | .....      | .....       | .....       | .....       |
| <i>Plasmodium reichenowi</i> _exon1 | .....G     | .....T..... | .....T.A..... | .....T..... | .....      | .....G      | GG.....     | .....A..... |

|                                     | 730        | 740        | 750        | 760        | 770        | 780        | 790        | 800        |
|-------------------------------------|------------|------------|------------|------------|------------|------------|------------|------------|
| PFD0100c_3D7_exon1                  | CTTTCTACAG | AAACAGGCGA | AGCGACACCA | AATATTCAAG | AAGAACCTTT | AAGGGTTACT | CCTCATGGAG | GG---GATAA |
| PFD0100c_exon1_Kilifi_062           | .....      | .....      | .....      | .....      | .....      | .....      | .....      | .....      |
| PFD0100c_exon1_Kilifi_091           | .....      | .....      | .....      | .....      | .....      | .....      | .....      | .....G.    |
| PFD0100c_exon1_Kilifi_250           | .....      | .....      | .....      | .....      | .....      | .....      | .....      | .....      |
| PFD0100c_exon1_Kilifi_314           | .C.....    | .....      | .....      | .....      | .....      | .....      | .....      | .....      |
| PFD0100c_exon1_Kilifi_093           | .....      | .....      | .....      | .....      | .....      | .....      | .....      | .....      |
| PFD0100c_exon1_Kilifi_128           | .....      | .....      | .....      | .....      | .....      | .....      | .....      | .....      |
| PFD0100c_exon1_Kilifi_186           | .....      | .....      | .....      | .....      | .....      | .....      | .....      | .....      |
| PFD0100c_exon1_Kilifi_345           | .....      | .....      | .....      | .....      | .....      | .....      | .....      | .....      |
| PFD0100c_exon1_Kilifi_202           | .....      | .....      | .....      | .....      | .....      | .....      | .....      | .....      |
| PFD0100c_exon1_Kilifi_290           | .....      | .....      | .....      | .....      | .....      | .....      | .....      | .....      |
| PFD0100c_exon1_Kilifi_304           | .....      | .....      | .....      | .....      | .....      | .....      | .....      | .....      |
| PFD0100c_exon1_Kilifi_299           | .....      | .....      | .....      | .....      | .....      | .....      | .....      | .....      |
| PFD0100c_exon1_Kilifi_082           | .....      | .....      | .....      | .....      | .....      | .....      | .....      | .....      |
| PFD0100c_exon1_Kilifi_334           | .....      | .....      | .....      | .....      | .....      | .....      | .....      | .....      |
| PFD0100c_exon1_Kilifi_298           | .....      | .....      | .....      | .....      | .....      | .....      | .....      | .....      |
| PFD0100c_exon1_Kilifi_105           | .....      | .....      | .....      | .....      | .....      | .....      | .....      | .....      |
| PFD0100c_exon1_Kilifi_406           | .....      | .....      | .....      | .....      | .....      | .....      | .....      | .....      |
| PFD0100c_exon1_Kilifi_510           | .C.....    | .....      | .....      | .....      | .....      | .....      | .....      | .....      |
| PFD0100c_exon1_Kilifi_164           | .C.....T.. | .....      | ..A.....   | .....      | .....      | .....      | .....      | .....G.    |
| PFD0100c_exon1_Kilifi_321           | .....      | .....      | .....      | .....      | .....      | .....      | .....      | .....      |
| PFD0100c_exon1_Kilifi_050           | .....      | .....      | .....      | .....      | .....      | .....      | .....      | .....      |
| PFD0100c_exon1_Kilifi_344           | .....      | .....      | .....      | .....      | .....      | .....      | .....      | .....      |
| PFD0100c_exon1_Kilifi_240           | .....      | .....      | .....      | .....      | .....      | .....      | .....      | .....      |
| PFD0100c_exon1_Kilifi_028           | .....      | .....      | .....      | .....      | .....      | .....      | .....      | .....      |
| PFD0100c_exon1_Kilifi_356           | .C.....    | .....      | .....      | .....      | .....      | .....      | .....      | .....      |
| PFD0100c_exon1_Kilifi_528           | .....      | .....      | .....      | .....      | .....      | .....      | .....      | .....      |
| PFD0100c_exon1_Kilifi_364           | .....      | .....      | .....      | .....      | .....      | .....      | .....      | .....      |
| PFD0100c_exon1_Kilifi_057           | .....      | .....      | .....      | .....      | .....      | .....      | .....      | .....      |
| PFD0100c_exon1_Kilifi_194           | .....      | .....      | .....      | .....      | .....      | .....      | .....      | .....      |
| PFD0100c_exon1_Kilifi_045           | .....      | .....      | .....      | .....      | .....      | .....      | .....      | .....      |
| PFD0100c_exon1_Kilifi_214           | .....      | .....      | .....      | .....      | .....      | .....      | .....      | .....      |
| PFD0100c_exon1_Kilifi_020           | .C.....T.. | .....      | ..A.....   | .....      | .....      | .....      | .....      | .....G.    |
| PFD0100c_exon1_Kilifi_023           | .....      | .....      | .....      | .....      | .....      | .....      | .....      | .....      |
| PFD0100c_exon1_Kilifi_052           | .....      | .....      | .....      | .....      | .....      | .....      | .....      | .....      |
| PFD0100c_exon1_Kilifi_340           | .....      | .....      | .....      | .....      | .....      | .....      | .....      | .....      |
| PFD0100c_exon1_Kilifi_027           | .C.....    | .....      | .....      | .....      | .....      | .....      | .....      | .....G.    |
| PFD0100c_exon1_Kilifi_097           | .....      | .....      | .....      | .....      | .....      | .....      | .....      | .....      |
| PFD0100c_exon1_Kilifi_187           | .C.....    | .....      | .....      | .....      | .....      | .....      | .....      | .....      |
| PFD0100c_exon1_Kilifi_201           | .....      | .....      | .....      | .....      | .....      | .....      | .....      | .....      |
| PFD0100c_exon1_Kilifi_310           | .C.....    | .....      | .....      | .....      | .....      | .....      | .....      | .....      |
| PFD0100c_exon1_Kilifi_302           | .....      | .....      | .....      | .....      | .....      | .....      | .....      | .....      |
| PFD0100c_exon1_Kilifi_324           | .....      | .....      | .....      | .....      | .....      | .....      | .....      | .....      |
| PFD0100c_exon1_Kilifi_333           | .....      | .....      | .....      | .....      | .....      | .....      | .....      | .....      |
| PFD0100c_exon1_Kilifi_311           | .C.....    | .....      | .....      | .....      | .....      | .....      | .....      | .....      |
| PFD0100c_exon1_Kilifi_297           | .....      | .....      | .....      | .....      | .....      | .....      | .....      | .....      |
| PFD0100c_exon1_Kilifi_319           | .....      | .....      | .....      | .....      | .....      | .....      | .....      | .....      |
| PFD0100c_exon1_Kilifi_289           | .....      | .....      | .....      | .....      | .....      | .....      | .....      | .....      |
| PFD0100c_exon1_Kilifi_247           | .....      | .....      | .....      | .....      | .....      | .....      | .....      | .....G.    |
| PFD0100c_exon1_Kilifi_110           | .C.....T.. | .....      | ..A.....   | .....      | .....      | .....      | .....      | .....G.    |
| PFD0100c_exon1_Kilifi_348           | .....      | .....      | .....      | .....      | .....      | .....      | .....      | .....      |
| PFD0100c_exon1_Kilifi_124           | .....      | .....      | .....      | .....      | .....      | .....      | .....      | .....      |
| <i>Plasmodium reichenowi</i> _exon1 | .C.....T.. | .....C..C. | ..A.....   | GT.G.....  | .....T.... | .....      | A.C.....   | AGCG.....  |

|                                     | 810        | 820        | 830        | 840        | 850        | 860        | 870        | 880        |
|-------------------------------------|------------|------------|------------|------------|------------|------------|------------|------------|
| PFD0100c_3D7_exon1                  | TCATGTTAAA | ACACCTCCTA | CAATTGTAAA | GACTGAAGTA | GGTAATGATA | ATCGAGAGAA | TGTAGTTTCT | ACTGCTGGTA |
| PFD0100c_exon1_Kilifi_062           | .....      | .....      | .....      | .....      | .....      | .....      | .....      | .....      |
| PFD0100c_exon1_Kilifi_091           | .....      | .....      | .....      | A.         | .....      | .....      | .....      | .....      |
| PFD0100c_exon1_Kilifi_250           | .....      | .....      | .....      | .....      | .....      | .....      | .....      | .....      |
| PFD0100c_exon1_Kilifi_314           | .....      | .....      | .....      | .....      | .....      | .....      | .....      | .....      |
| PFD0100c_exon1_Kilifi_093           | .....      | .....      | .....      | .....      | .....      | .....      | .....      | .....      |
| PFD0100c_exon1_Kilifi_128           | .....      | .....      | .....      | .....      | .....      | .....      | .....      | .....      |
| PFD0100c_exon1_Kilifi_186           | .....      | .....      | .....      | .....      | .....      | .....      | .....      | .....      |
| PFD0100c_exon1_Kilifi_345           | .....      | .....      | .....      | .....      | .....      | .....      | .....      | .....      |
| PFD0100c_exon1_Kilifi_202           | .....      | .....      | .....      | .....      | .....      | .....      | .....      | .....      |
| PFD0100c_exon1_Kilifi_290           | .....      | .....      | .....      | .....      | .....      | .....      | .....      | .....      |
| PFD0100c_exon1_Kilifi_304           | .....      | .....      | .....      | .....      | .....      | .....      | .....      | .....      |
| PFD0100c_exon1_Kilifi_299           | .....      | .....      | .....      | .....      | .....      | .....      | .....      | .....      |
| PFD0100c_exon1_Kilifi_082           | .....      | .....      | .....      | .....      | .....      | .....      | .....      | .....      |
| PFD0100c_exon1_Kilifi_334           | .....      | .....      | .....      | .....      | .....      | .....      | .....      | .....      |
| PFD0100c_exon1_Kilifi_298           | .....      | T.         | .....      | .....      | G.         | .....      | .....      | .....      |
| PFD0100c_exon1_Kilifi_105           | .....      | .....      | .....      | .....      | .....      | .....      | .....      | .....      |
| PFD0100c_exon1_Kilifi_406           | .....      | T.         | .....      | .....      | .....      | .....      | .....      | .....      |
| PFD0100c_exon1_Kilifi_510           | .....      | .....      | .....      | .....      | .....      | .....      | C.         | .....      |
| PFD0100c_exon1_Kilifi_164           | .....      | .....      | .....      | .....      | .....      | .....      | .....      | .....      |
| PFD0100c_exon1_Kilifi_321           | .....      | .....      | .....      | .....      | .....      | .....      | .....      | .....      |
| PFD0100c_exon1_Kilifi_050           | .....      | .....      | .....      | .....      | .....      | .....      | .....      | .....      |
| PFD0100c_exon1_Kilifi_344           | .....      | .....      | .....      | .....      | .....      | .....      | .....      | .....      |
| PFD0100c_exon1_Kilifi_240           | .....      | .....      | .....      | .....      | .....      | .....      | .....      | .....      |
| PFD0100c_exon1_Kilifi_028           | .....      | .....      | .....      | .....      | .....      | .....      | .....      | .....      |
| PFD0100c_exon1_Kilifi_356           | .....      | .....      | .....      | .....      | .....      | .....      | .....      | .....      |
| PFD0100c_exon1_Kilifi_528           | .....      | .....      | .....      | .....      | .....      | .....      | .....      | .....      |
| PFD0100c_exon1_Kilifi_364           | .....      | .....      | .....      | .....      | .....      | .....      | .....      | .....      |
| PFD0100c_exon1_Kilifi_057           | .....      | .....      | .....      | .....      | .....      | .....      | .....      | .....      |
| PFD0100c_exon1_Kilifi_194           | .....      | .....      | .....      | .....      | .....      | .....      | .....      | .....      |
| PFD0100c_exon1_Kilifi_045           | .....      | .....      | .....      | .....      | .....      | .....      | .....      | .....      |
| PFD0100c_exon1_Kilifi_214           | .....      | .....      | .....      | .....      | .....      | .....      | .....      | .....      |
| PFD0100c_exon1_Kilifi_020           | .....      | .....      | .....      | .....      | .....      | .....      | .....      | .....      |
| PFD0100c_exon1_Kilifi_023           | .....      | .....      | .....      | .....      | .....      | .....      | .....      | .....      |
| PFD0100c_exon1_Kilifi_052           | .....      | .....      | .....      | .....      | .....      | .....      | .....      | .....      |
| PFD0100c_exon1_Kilifi_340           | .....      | .....      | .....      | .....      | .....      | .....      | .....      | .....      |
| PFD0100c_exon1_Kilifi_027           | .....      | .....      | .....      | A.         | .....      | .....      | .....      | .....      |
| PFD0100c_exon1_Kilifi_097           | .....      | .....      | .....      | .....      | .....      | .....      | .....      | .....      |
| PFD0100c_exon1_Kilifi_187           | .....      | .....      | .....      | .....      | .....      | .....      | .....      | .....      |
| PFD0100c_exon1_Kilifi_201           | .....      | .....      | .....      | .....      | G.         | .....      | .....      | .....      |
| PFD0100c_exon1_Kilifi_310           | .....      | .....      | .....      | .....      | .....      | .....      | .....      | .....      |
| PFD0100c_exon1_Kilifi_302           | .....      | .....      | .....      | .....      | .....      | .....      | .....      | .....      |
| PFD0100c_exon1_Kilifi_324           | .....      | .....      | .....      | .....      | .....      | .....      | .....      | .....      |
| PFD0100c_exon1_Kilifi_333           | .....      | .....      | .....      | .....      | .....      | .....      | .....      | .....      |
| PFD0100c_exon1_Kilifi_311           | .....      | .....      | .....      | .....      | .....      | .....      | .....      | .....      |
| PFD0100c_exon1_Kilifi_297           | .....      | .....      | .....      | .....      | .....      | .....      | .....      | .....      |
| PFD0100c_exon1_Kilifi_319           | .....      | .....      | .....      | .....      | .....      | .....      | .....      | .....      |
| PFD0100c_exon1_Kilifi_289           | .....      | .....      | .....      | .....      | .....      | .....      | .....      | .....      |
| PFD0100c_exon1_Kilifi_247           | .....      | .....      | .....      | .....      | .....      | .....      | .....      | .....      |
| PFD0100c_exon1_Kilifi_110           | .....      | T.         | T.         | A.         | .....      | .....      | .....      | .....      |
| PFD0100c_exon1_Kilifi_348           | .....      | .....      | .....      | .....      | .....      | .....      | .....      | .....      |
| PFD0100c_exon1_Kilifi_124           | .....      | .....      | .....      | .....      | .....      | .....      | .....      | .....      |
| <i>Plasmodium reichenowi</i> _exon1 | ..C...G.   | .....G     | .....      | A.....A.   | .....A...  | ..A.....   | ..C.....   | ..A...A.   |

|                                     | 890        | 900         | 910         | 920           | 930         | 940        | 950        | 960             |
|-------------------------------------|------------|-------------|-------------|---------------|-------------|------------|------------|-----------------|
| PFD0100c_3D7_exon1                  | AAAGATTAAA | TAGAGGTAAA  | CCAAATAAAG  | ATGGGGTTCC    | ACATACATCT  | AGATTTAAAA | CACCTAAAGT | TAGTGCACCT      |
| PFD0100c_exon1_Kilifi_062           | .....      | .....       | .....       | .....         | .....A..    | AG.....    | .....      | G..G.....       |
| PFD0100c_exon1_Kilifi_091           | .....      | .....       | .....       | .....         | .....A..    | AG.....    | .....      | G..G.....       |
| PFD0100c_exon1_Kilifi_250           | .....      | G.....      | .....A..G.. | .....         | .....A..    | AG.....    | .....      | G..G.....       |
| PFD0100c_exon1_Kilifi_314           | .....      | G.....      | .....       | .....         | .....A..    | AG.....    | .....      | G..G.....       |
| PFD0100c_exon1_Kilifi_093           | .....      | G.....      | .....       | .....         | .....A..    | AG.....    | .....      | G..G.....       |
| PFD0100c_exon1_Kilifi_128           | .....      | G.....      | .....       | .....         | .....A..    | AG.....    | .....      | G..G.....       |
| PFD0100c_exon1_Kilifi_186           | .....      | G.....      | .....       | .....G..      | .....       | A.....     | .....      | G..G.....       |
| PFD0100c_exon1_Kilifi_345           | .....      | .....       | .....       | .....         | .....A..    | AG.....    | .....      | G..G.....       |
| PFD0100c_exon1_Kilifi_202           | .....      | .....       | .....       | .....         | .....A..    | AG.....    | .....      | G..G.....       |
| PFD0100c_exon1_Kilifi_290           | .....      | .....       | .....       | .....         | .....A..    | AG.....    | .....      | G..G.....       |
| PFD0100c_exon1_Kilifi_304           | .....      | .....       | .....       | .....A..G..   | .....       | A.....     | .....      | G..G.....       |
| PFD0100c_exon1_Kilifi_299           | .....      | G.....      | .....       | .....         | .....A..    | AG.....    | .....      | G..G.....       |
| PFD0100c_exon1_Kilifi_082           | .....      | .....       | .....       | .....         | .....A..    | AG.....    | .....      | G..G.....       |
| PFD0100c_exon1_Kilifi_334           | .....      | .....       | .....       | .....         | .....A..    | AG.....    | .....      | G..G.....       |
| PFD0100c_exon1_Kilifi_298           | .....      | .....       | .....       | .....A..G..   | .....       | A.....     | .....      | G..G.....       |
| PFD0100c_exon1_Kilifi_105           | .....      | .....       | .....       | .....         | .....A..    | AG.....    | .....      | G..G.....       |
| PFD0100c_exon1_Kilifi_406           | .....      | .....       | .....       | .....         | .....A..    | AG.....    | .....      | G..G.....       |
| PFD0100c_exon1_Kilifi_510           | .....      | .....       | .....       | .....         | .....AT..   | AG.....    | .....      | G..G.....       |
| PFD0100c_exon1_Kilifi_164           | .....      | .....       | .....       | .....A..G..   | .....       | A.....     | .....      | G..G.....       |
| PFD0100c_exon1_Kilifi_321           | .....      | .....       | .....       | .....         | .....A..    | AG.....    | .....      | G..G.....       |
| PFD0100c_exon1_Kilifi_050           | .....      | G.....      | .....       | .....         | .....A..    | AG.....    | .....      | G..G.....       |
| PFD0100c_exon1_Kilifi_344           | .....      | .....       | .....       | .....         | .....       | .....      | .....      | G..G.....       |
| PFD0100c_exon1_Kilifi_240           | .....      | .....       | .....       | .....         | .....       | A.....     | .....      | G..G.....       |
| PFD0100c_exon1_Kilifi_028           | .....      | G.....      | .....       | .....         | .....       | .....      | .....      | G..G.....       |
| PFD0100c_exon1_Kilifi_356           | .....      | .....       | .....       | .....         | .....A..    | AG.....    | .....      | G..G.....       |
| PFD0100c_exon1_Kilifi_528           | .....      | G.....      | .....       | .....         | .....A..    | AG.....    | .....      | G..G.....       |
| PFD0100c_exon1_Kilifi_364           | .....      | .....       | .....       | .....         | .....A..    | AG.....    | .....      | G..G.....       |
| PFD0100c_exon1_Kilifi_057           | .....      | .....       | .....       | .....         | .....A..    | AG.....    | .....      | G..G.....       |
| PFD0100c_exon1_Kilifi_194           | .....      | G.....      | .....       | .....         | .....A..    | AG.....    | .....      | G..G.....       |
| PFD0100c_exon1_Kilifi_045           | .....      | .....       | .....       | .....         | .....A..    | AG.....    | .....      | G..G.....       |
| PFD0100c_exon1_Kilifi_214           | .....      | .....       | .....       | .....         | .....A..    | AG.....    | .....      | G..G.....       |
| PFD0100c_exon1_Kilifi_020           | .....      | .....A..... | .....T..... | .....G...G..A | .....       | A.....     | .....      | G...T...        |
| PFD0100c_exon1_Kilifi_023           | .....      | .....       | .....       | .....         | .....A..    | AG.....    | .....      | G..G.....       |
| PFD0100c_exon1_Kilifi_052           | .....      | .....       | .....       | .....         | .....       | .....      | .....      | .....           |
| PFD0100c_exon1_Kilifi_340           | .....      | .....       | .....       | .....         | .....A..    | AG.....    | .....      | G..G.....       |
| PFD0100c_exon1_Kilifi_027           | .....      | G.....      | .....       | .....         | .....       | .....      | .....      | .....           |
| PFD0100c_exon1_Kilifi_097           | .....      | G.....      | .....       | .....         | .....       | .....      | .....      | .....           |
| PFD0100c_exon1_Kilifi_187           | .....      | G.....      | .....       | .....         | .....A..    | AG.....    | .....      | G..G.....       |
| PFD0100c_exon1_Kilifi_201           | .....      | G.....      | .....       | .....         | .....A..    | AG.....    | .....      | G..G.....       |
| PFD0100c_exon1_Kilifi_310           | .....      | G.....      | .....       | .....         | .....A..    | AG.....    | .....      | G..G.....       |
| PFD0100c_exon1_Kilifi_302           | .....      | .....       | .....       | .....         | .....A..    | AG.....    | .....      | G..G.....       |
| PFD0100c_exon1_Kilifi_324           | .....      | .....       | .....       | .....         | .....A..    | AG.....    | .....      | G..G.....       |
| PFD0100c_exon1_Kilifi_333           | .....      | .....       | .....       | .....         | .....A..    | AG.....    | .....      | G..G.....       |
| PFD0100c_exon1_Kilifi_311           | .....      | G.....      | .....       | .....         | .....A..    | AG.....    | .....      | G..G.....       |
| PFD0100c_exon1_Kilifi_297           | .....      | G.....      | .....       | .....         | .....A..    | AG.....    | .....      | G..G.....       |
| PFD0100c_exon1_Kilifi_319           | .....      | G.....      | .....       | .....         | .....A..    | AG.....    | .....      | G..G.....       |
| PFD0100c_exon1_Kilifi_289           | .....      | G.....      | .....       | .....         | .....A..    | AG.....    | .....      | G..G.....       |
| PFD0100c_exon1_Kilifi_247           | .....      | G.....      | .....       | .....         | .....A..    | AG.....    | .....      | G..G.....       |
| PFD0100c_exon1_Kilifi_110           | .....      | .....       | .....       | .....         | .....A..G.. | .....      | .....      | G..G.....       |
| PFD0100c_exon1_Kilifi_348           | .....      | G.....      | .....       | .....         | .....A..    | AG.....    | .....      | G..G.....       |
| PFD0100c_exon1_Kilifi_124           | .....      | G.....      | .....       | .....         | .....A..    | AG.....    | .....      | G..G.....       |
| <i>Plasmodium reichenowi</i> _exon1 | C.....CT.. | .CT.....    | .....       | .....A..G..A  | .....       | A.....     | AG...G..   | ....C.....A.... |

|                                     | 970                                                         | 980         | 990          | 1000           | 1010       | 1020            | 1030            | 1040        |
|-------------------------------------|-------------------------------------------------------------|-------------|--------------|----------------|------------|-----------------|-----------------|-------------|
| PFD0100c_3D7_exon1                  | ..... ..... ..... ..... ..... ..... ..... ..... ..... ..... |             |              |                |            |                 |                 |             |
|                                     | GCTGGAGGGA                                                  | AAAAATCTAA  | AAATGCAAGA   | GATAGTACTG     | AACCAAAACA | TCATAAGGAA      | AAAGGAAAAT      | ATGATAGGAT  |
| PFD0100c_exon1_Kilifi_062           | .....A.....                                                 | .....       | .....        | .....          | .....      | .....A.A.....   | .....A.CC.....  | .....       |
| PFD0100c_exon1_Kilifi_091           | .....A.....                                                 | .....       | .....        | .....A.....    | .....      | .....A.A.....   | .....A.CC.....  | .....       |
| PFD0100c_exon1_Kilifi_250           | .....A.....                                                 | .....       | .....        | .....          | .....      | .....A.A.....   | .....A.CC.....  | .....       |
| PFD0100c_exon1_Kilifi_314           | .....A.....                                                 | .....       | .....        | .....          | .....      | .....A.A.....   | .....A.CC.....  | .....       |
| PFD0100c_exon1_Kilifi_093           | .....A.....                                                 | .....       | .....        | .....          | .....      | .....A.A.....   | .....A.CC.....  | .....       |
| PFD0100c_exon1_Kilifi_128           | .....A.....                                                 | .....       | .....TT..... | .....GG.A..... | .....      | .....A.A.C..... | .....AC.TC..... | .....C..... |
| PFD0100c_exon1_Kilifi_186           | .....A.....                                                 | .....       | .....        | .....          | .....      | .....A.....     | .....A.CC.....  | .....       |
| PFD0100c_exon1_Kilifi_345           | .....A.....                                                 | .....       | .....        | .....A.....    | .....      | .....A.A.....   | .....A.CC.....  | .....       |
| PFD0100c_exon1_Kilifi_202           | .....A.....                                                 | .....       | .....        | .....A.....    | .....      | .....A.A.....   | .....A.CC.....  | .....       |
| PFD0100c_exon1_Kilifi_290           | .....A.....                                                 | .....       | .....        | .....          | .....      | .....A.A.....   | .....A.CC.....  | .....       |
| PFD0100c_exon1_Kilifi_304           | .....A.....                                                 | .....       | .....        | .....          | .....      | .....A.A.....   | .....A.CC.....  | .....       |
| PFD0100c_exon1_Kilifi_299           | .....A.....                                                 | .....       | .....        | .....          | .....      | .....A.A.....   | .....A.CC.....  | .....       |
| PFD0100c_exon1_Kilifi_082           | .....A.....                                                 | .....       | .....        | .....          | .....      | .....A.A.....   | .....A.CC.....  | .....       |
| PFD0100c_exon1_Kilifi_334           | .....A.....                                                 | .....       | .....        | .....          | .....      | .....A.A.....   | .....A.CC.....  | .....       |
| PFD0100c_exon1_Kilifi_298           | .....A.....                                                 | .....       | .....        | .....          | .....      | .....A.A.C..... | .....AC.TC..... | .....       |
| PFD0100c_exon1_Kilifi_105           | .....A.....                                                 | .....       | .....        | .....          | .....      | .....A.A.....   | .....A.CC.....  | .....       |
| PFD0100c_exon1_Kilifi_406           | .....A.....                                                 | .....       | .....        | .....          | .....      | .....A.A.....   | .....A.CC.....  | .....       |
| PFD0100c_exon1_Kilifi_510           | .....A.....                                                 | .....T..... | .....        | .....A.....    | .....      | .....A.A.....   | .....A.CC.....  | .....       |
| PFD0100c_exon1_Kilifi_164           | .....A.....                                                 | .....       | .....        | .....          | .....      | .....A.A.....   | .....A.CC.....  | .....       |
| PFD0100c_exon1_Kilifi_321           | .....A.....                                                 | .....       | .....        | .....          | .....      | .....A.A.....   | .....A.CC.....  | .....       |
| PFD0100c_exon1_Kilifi_050           | .....A.....                                                 | .....       | .....        | .....          | .....      | .....A.A.....   | .....A.CC.....  | .....       |
| PFD0100c_exon1_Kilifi_344           | .....A.....                                                 | .....       | .....        | .....          | .....      | .....A.A.....   | .....A.CC.....  | .....       |
| PFD0100c_exon1_Kilifi_240           | .....A.....                                                 | .....       | .....        | .....          | .....      | .....A.A.....   | .....A.CC.....  | .....       |
| PFD0100c_exon1_Kilifi_028           | .....A.....                                                 | .....       | .....        | .....          | .....      | .....A.A.....   | .....A.CC.....  | .....       |
| PFD0100c_exon1_Kilifi_356           | .....A.....                                                 | .....       | .....        | .....          | .....      | .....A.A.....   | .....A.CC.....  | .....       |
| PFD0100c_exon1_Kilifi_528           | .....A.....                                                 | .....       | .....        | .....A.....    | .....      | .....A.A.....   | .....A.CC.....  | .....       |
| PFD0100c_exon1_Kilifi_364           | .....A.....                                                 | .....       | .....        | .....          | .....      | .....A.A.....   | .....A.CC.....  | .....       |
| PFD0100c_exon1_Kilifi_057           | .....A.....                                                 | .....       | .....        | .....A.....    | .....      | .....A.A.....   | .....A.CC.....  | .....       |
| PFD0100c_exon1_Kilifi_194           | .....A.....                                                 | .....       | .....        | .....          | .....      | .....A.A.....   | .....A.CC.....  | .....       |
| PFD0100c_exon1_Kilifi_045           | .....A.....                                                 | .....       | .....        | .....          | .....      | .....A.A.....   | .....A.CC.....  | .....       |
| PFD0100c_exon1_Kilifi_214           | .....A.....                                                 | .....       | .....        | .....          | .....      | .....A.A.....   | .....A.CC.....  | .....       |
| PFD0100c_exon1_Kilifi_020           | .....T.....                                                 | .....       | .....TT..... | .....GG.A..... | .....      | .....A.A.....   | .....AC.TC..... | .....C..... |
| PFD0100c_exon1_Kilifi_023           | .....A.....                                                 | .....       | .....        | .....          | .....      | .....A.A.....   | .....A.CC.....  | .....       |
| PFD0100c_exon1_Kilifi_052           | .....A.....                                                 | .....       | .....        | .....          | .....      | .....A.A.....   | .....A.CC.....  | .....       |
| PFD0100c_exon1_Kilifi_340           | .....A.....                                                 | .....       | .....        | .....          | .....      | .....A.A.....   | .....A.CC.....  | .....       |
| PFD0100c_exon1_Kilifi_027           | .....A.....                                                 | .....       | .....        | .....          | .....      | .....A.A.....   | .....A.CC.....  | .....       |
| PFD0100c_exon1_Kilifi_097           | .....A.....                                                 | .....       | .....        | .....          | .....      | .....A.A.....   | .....A.CC.....  | .....       |
| PFD0100c_exon1_Kilifi_187           | .....A.....                                                 | .....       | .....        | .....          | .....      | .....A.A.....   | .....A.CC.....  | .....       |
| PFD0100c_exon1_Kilifi_201           | .....A.....                                                 | .....       | .....        | .....A.....    | .....      | .....A.A.....   | .....A.CC.....  | .....       |
| PFD0100c_exon1_Kilifi_310           | .....A.....                                                 | .....       | .....        | .....          | .....      | .....A.A.....   | .....A.CC.....  | .....       |
| PFD0100c_exon1_Kilifi_302           | .....A.....                                                 | .....       | .....        | .....          | .....      | .....A.A.....   | .....A.CC.....  | .....       |
| PFD0100c_exon1_Kilifi_324           | .....A.....                                                 | .....       | .....        | .....          | .....      | .....A.A.....   | .....A.CC.....  | .....       |
| PFD0100c_exon1_Kilifi_333           | .....A.....                                                 | .....       | .....        | .....          | .....      | .....A.A.....   | .....A.CC.....  | .....       |
| PFD0100c_exon1_Kilifi_311           | .....A.....                                                 | .....       | .....        | .....          | .....      | .....A.A.....   | .....A.CC.....  | .....       |
| PFD0100c_exon1_Kilifi_297           | .....A.....                                                 | .....       | .....        | .....          | .....      | .....A.A.....   | .....A.CC.....  | .....       |
| PFD0100c_exon1_Kilifi_319           | .....A.....                                                 | .....       | .....        | .....          | .....      | .....A.A.....   | .....A.CC.....  | .....       |
| PFD0100c_exon1_Kilifi_289           | .....A.....                                                 | .....       | .....        | .....          | .....      | .....A.A.....   | .....A.CC.....  | .....       |
| PFD0100c_exon1_Kilifi_247           | .....A.....                                                 | .....       | .....        | .....A.....    | .....      | .....A.A.....   | .....A.CC.....  | .....       |
| PFD0100c_exon1_Kilifi_110           | .....A.....                                                 | .....       | .....        | .....          | .....      | .....A.A.....   | .....A.CC.....  | .....       |
| PFD0100c_exon1_Kilifi_348           | .....A.....                                                 | .....       | .....        | .....          | .....      | .....A.A.....   | .....A.CC.....  | .....       |
| PFD0100c_exon1_Kilifi_124           | .....A.....                                                 | .....       | .....        | .....          | .....      | .....A.A.....   | .....A.CC.....  | .....       |
| <i>Plasmodium reichenowi</i> _exon1 | .....T.....                                                 | .....G..... | .....A.....  | .....G.....    | .....      | .....G.A.A..... | .....AC.TC..... | .....A..... |

|                                     | 1050       | 1060       | 1070       | 1080       | 1090       | 1100       | 1110      | 1120      |
|-------------------------------------|------------|------------|------------|------------|------------|------------|-----------|-----------|
| PFD0100c_3D7_exon1                  | TAAAAAACA  | AGCGAACAAA | TAAATAAATA | CGCTCATCCT | AATAATAAAT | ATACTATCPT | TCAGTGACT | GATTAGATT |
| PFD0100c_exon1_Kilifi_062           | .....      | C.T.....   | .....      | G.....     | .....      | .....      | .....     | .....     |
| PFD0100c_exon1_Kilifi_091           | .....      | C.T.....   | .....      | G.....     | .....      | .....      | .....     | .....     |
| PFD0100c_exon1_Kilifi_250           | .....      | C.T.....   | .....      | G.....     | .....      | .....      | .....     | .....     |
| PFD0100c_exon1_Kilifi_314           | .....      | C.T.....   | .....      | G.....     | .....      | .....      | .....     | .....     |
| PFD0100c_exon1_Kilifi_093           | .....      | C.T.....   | .....      | G.....     | .....      | .....      | .....     | .....     |
| PFD0100c_exon1_Kilifi_128           | ..GG.....  | .....      | .....      | G.....     | .....      | .....      | .....     | .....     |
| PFD0100c_exon1_Kilifi_186           | .....      | C.T.....   | .....      | G.....     | .....      | .....      | .....     | .....     |
| PFD0100c_exon1_Kilifi_345           | .....      | C.T.....   | .....      | G.....     | .....      | .....      | .....     | .....     |
| PFD0100c_exon1_Kilifi_202           | .....      | C.T.....   | .....      | G.....     | .....      | .....      | .....     | .....     |
| PFD0100c_exon1_Kilifi_290           | .....      | C.T.....   | .....      | G.....     | .....      | .....      | .....     | .....     |
| PFD0100c_exon1_Kilifi_304           | .....      | C.T.....   | .....      | G.....     | .....      | .....      | .....     | .....     |
| PFD0100c_exon1_Kilifi_299           | .....      | C.T.....   | .....      | G.....     | .....      | .....      | .....     | .....     |
| PFD0100c_exon1_Kilifi_082           | .....      | C.T.....   | .....      | G.....     | .....      | .....      | .....     | .....     |
| PFD0100c_exon1_Kilifi_334           | .....      | C.T.....   | .....      | G.....     | .....      | .....      | .....     | .....     |
| PFD0100c_exon1_Kilifi_298           | .....      | C.T.....   | .....      | G.....     | .....      | .....      | .....     | .....     |
| PFD0100c_exon1_Kilifi_105           | .....      | C.T.....   | .....      | G.....     | .....      | .....      | .....     | .....     |
| PFD0100c_exon1_Kilifi_406           | .....      | C.T.....   | .....      | G.....     | .....      | .....      | .....     | .....     |
| PFD0100c_exon1_Kilifi_510           | .....      | C.T.....   | .....      | G.....     | .....      | .....      | .....     | .....     |
| PFD0100c_exon1_Kilifi_164           | .....      | C.T.....   | .....      | G.....     | .....      | .....      | .....     | .....     |
| PFD0100c_exon1_Kilifi_321           | .....      | .....      | .....      | G.....     | .....      | .....      | .....     | .....     |
| PFD0100c_exon1_Kilifi_050           | .....      | C.T.....   | .....      | G.....     | .....      | .....      | .....     | .....     |
| PFD0100c_exon1_Kilifi_344           | .....      | .....      | .....      | G.....     | .....      | .....      | .....     | .....     |
| PFD0100c_exon1_Kilifi_240           | .....      | C.T.....   | .....      | G.....     | .....      | .....      | .....     | .....     |
| PFD0100c_exon1_Kilifi_028           | .....      | C.T.....   | .....      | G.....     | .....      | .....      | .....     | .....     |
| PFD0100c_exon1_Kilifi_356           | .....      | C.T.....   | .....      | G.....     | .....      | .....      | .....     | .....     |
| PFD0100c_exon1_Kilifi_528           | .....      | C.T.....   | .....      | G.....     | .....      | .....      | .....     | .....     |
| PFD0100c_exon1_Kilifi_364           | .....      | C.T.....   | .....      | G.....     | .....      | .....      | .....     | .....     |
| PFD0100c_exon1_Kilifi_057           | .....      | C.T.....   | .....      | G.....     | .....      | .....      | .....     | .....     |
| PFD0100c_exon1_Kilifi_194           | .....      | C.T.....   | .....      | G.....     | .....      | .....      | .....     | .....     |
| PFD0100c_exon1_Kilifi_045           | .....      | C.T.....   | .....      | G.....     | .....      | .....      | .....     | .....     |
| PFD0100c_exon1_Kilifi_214           | .....      | C.T.....   | .....      | G.....     | .....      | .....      | .....     | .....     |
| PFD0100c_exon1_Kilifi_020           | ..GG.....  | ..T.....   | .....      | .....      | .....      | .....      | .....     | .....     |
| PFD0100c_exon1_Kilifi_023           | .....      | C.T.....   | .....      | G.....     | .....      | .....      | .....     | .....     |
| PFD0100c_exon1_Kilifi_052           | .....      | .....      | .....      | .....      | .....      | .....      | .....     | .....     |
| PFD0100c_exon1_Kilifi_340           | .....      | C.T.....   | .....      | G.....     | .....      | .....      | .....     | .....     |
| PFD0100c_exon1_Kilifi_027           | .....      | .....      | .....      | .....      | .....      | .....      | .....     | .....     |
| PFD0100c_exon1_Kilifi_097           | .....      | C.T.....   | .....      | .....      | .....      | .....      | .....     | .....     |
| PFD0100c_exon1_Kilifi_187           | .....      | .....      | .....      | .....      | .....      | .....      | .....     | .....     |
| PFD0100c_exon1_Kilifi_201           | .....      | C.T.....   | .....      | .....      | .....      | .....      | .....     | .....     |
| PFD0100c_exon1_Kilifi_310           | .....      | C.T.....   | .....      | .....      | .....      | .....      | .....     | .....     |
| PFD0100c_exon1_Kilifi_302           | .....      | C.T.....   | .....      | G.....     | .....      | .....      | .....     | .....     |
| PFD0100c_exon1_Kilifi_324           | .....      | C.T.....   | .....      | G.....     | .....      | .....      | .....     | .....     |
| PFD0100c_exon1_Kilifi_333           | .....      | C.T.....   | .....      | C.T.....   | .....      | .....      | .....     | .....     |
| PFD0100c_exon1_Kilifi_311           | .....      | C.T.....   | .....      | .....      | .....      | .....      | .....     | .....     |
| PFD0100c_exon1_Kilifi_297           | .....      | C.T.....   | .....      | G.....     | .....      | .....      | .....     | .....     |
| PFD0100c_exon1_Kilifi_319           | .....      | .....      | .....      | .....      | .....      | .....      | .....     | .....     |
| PFD0100c_exon1_Kilifi_289           | .....      | C.T.....   | .....      | G.....     | .....      | .....      | .....     | .....     |
| PFD0100c_exon1_Kilifi_247           | .....      | C.T.....   | .....      | G.....     | .....      | .....      | .....     | .....     |
| PFD0100c_exon1_Kilifi_110           | .....      | C.T.....   | .....      | G.....     | .....      | .....      | .....     | .....     |
| PFD0100c_exon1_Kilifi_348           | .....      | C.T.....   | .....      | G.....     | .....      | .....      | .....     | .....     |
| PFD0100c_exon1_Kilifi_124           | .....      | C.T.....   | .....      | G.....     | .....      | .....      | .....     | .....     |
| <i>Plasmodium reichenowi</i> _exon1 | C.G.G..G.. | .AT.....   | .....      | .....      | .....      | ..G.....   | .G.....   | .....     |

|                                     | 1130       | 1140        | 1150        | 1160        | 1170       | 1180       | 1190       | 1200       |
|-------------------------------------|------------|-------------|-------------|-------------|------------|------------|------------|------------|
| PFD0100c_3D7_exon1                  | GTAAATGGCT | GAAACCTAAA  | CATATTAAT   | ATCCATATGA  | AGGTTATGAT | ATAGTTGATA | ATGATAAACT | TGTAGATACA |
| PFD0100c_exon1_Kilifi_062           | .....      | .....       | .....       | .....       | .....      | .....      | .....      | .....      |
| PFD0100c_exon1_Kilifi_091           | .....      | .....       | .....       | .....       | .....      | .....      | .....      | .....      |
| PFD0100c_exon1_Kilifi_250           | .....      | .....       | .....       | .....       | .....      | .....      | .....      | .....      |
| PFD0100c_exon1_Kilifi_314           | ....A....  | .....       | .....       | .....       | .....      | .....      | .....      | .....      |
| PFD0100c_exon1_Kilifi_093           | .....      | .....       | .....       | .....       | .....      | .....      | .....      | .....      |
| PFD0100c_exon1_Kilifi_128           | ....A....  | .....       | .....       | .....       | .....      | .....      | .....      | .....      |
| PFD0100c_exon1_Kilifi_186           | .....      | .....       | .....       | .....       | .....      | .....      | .....      | .....      |
| PFD0100c_exon1_Kilifi_345           | .....      | .....       | .....       | .....       | .....      | .....      | .....      | .....      |
| PFD0100c_exon1_Kilifi_202           | .....      | .....       | .....       | .....       | .....      | .....      | .....      | .....      |
| PFD0100c_exon1_Kilifi_290           | .....      | .....       | .....       | .....       | .....      | .....      | .....      | .....      |
| PFD0100c_exon1_Kilifi_304           | .....      | .....       | .....       | .....       | .....      | .....      | .....      | .....      |
| PFD0100c_exon1_Kilifi_299           | .....      | .....       | .....       | .....       | .....      | .....      | .....      | .....      |
| PFD0100c_exon1_Kilifi_082           | .....      | .....       | .....       | .....       | .....      | .....      | .....      | .....      |
| PFD0100c_exon1_Kilifi_334           | .....      | .....       | .....       | .....       | .....      | .....      | .....      | .....      |
| PFD0100c_exon1_Kilifi_298           | .....      | .....       | .....       | .....       | .....      | .....      | .....      | .....      |
| PFD0100c_exon1_Kilifi_105           | .....      | .....       | .....       | .....       | .....      | .....      | .....      | .....      |
| PFD0100c_exon1_Kilifi_406           | .....      | .....       | .....       | .....       | .....      | .....      | .....      | .....      |
| PFD0100c_exon1_Kilifi_510           | .....      | .....A..... | .....       | .....       | .....      | .....      | .....      | .....      |
| PFD0100c_exon1_Kilifi_164           | .....      | .....       | .....       | .....       | .....      | .....      | .....      | .....      |
| PFD0100c_exon1_Kilifi_321           | .....      | .....       | .....       | .....       | .....      | .....      | .....      | .....      |
| PFD0100c_exon1_Kilifi_050           | .....      | .....       | .....       | .....       | .....      | .....      | .....      | .....      |
| PFD0100c_exon1_Kilifi_344           | .....      | .....       | .....       | .....       | .....      | .....      | .....      | .....      |
| PFD0100c_exon1_Kilifi_240           | .....      | .....       | .....       | .....       | .....      | .....      | .....      | .....      |
| PFD0100c_exon1_Kilifi_028           | .....      | .....       | .....       | .....       | .....      | .....      | .....      | .....      |
| PFD0100c_exon1_Kilifi_356           | ....A....  | .....       | .....       | .....       | .....      | .....      | .....      | .....      |
| PFD0100c_exon1_Kilifi_528           | .....      | .....       | .....       | .....       | .....      | .....      | .....      | .....      |
| PFD0100c_exon1_Kilifi_364           | .....      | .....       | .....       | .....       | .....      | .....      | .....      | .....      |
| PFD0100c_exon1_Kilifi_057           | .....      | .....       | .....       | .....       | .....      | .....      | .....      | .....      |
| PFD0100c_exon1_Kilifi_194           | .....      | .....       | .....       | .....       | .....      | .....      | .....      | .....      |
| PFD0100c_exon1_Kilifi_045           | .....      | .....       | .....       | .....       | .....      | .....      | .....      | .....      |
| PFD0100c_exon1_Kilifi_214           | .....      | .....       | .....       | .....       | .....      | .....      | .....      | .....      |
| PFD0100c_exon1_Kilifi_020           | .....      | .....A..... | .....A..... | .....C..... | .....      | .....      | .....      | .....      |
| PFD0100c_exon1_Kilifi_023           | .....      | .....       | .....       | .....       | .....      | .....      | .....      | .....      |
| PFD0100c_exon1_Kilifi_052           | .....      | .....       | .....       | .....       | .....      | .....      | .....      | .....      |
| PFD0100c_exon1_Kilifi_340           | .....      | .....       | .....       | .....       | .....      | .....      | .....      | .....      |
| PFD0100c_exon1_Kilifi_027           | ....A....  | .....       | .....       | .....       | .....      | .....      | .....      | .....      |
| PFD0100c_exon1_Kilifi_097           | .....      | .....       | .....       | .....       | .....      | .....      | .....      | .....      |
| PFD0100c_exon1_Kilifi_187           | ....A....  | .....       | .....       | .....       | .....      | .....      | .....      | .....      |
| PFD0100c_exon1_Kilifi_201           | .....      | .....       | .....       | .....       | .....      | .....      | .....      | .....      |
| PFD0100c_exon1_Kilifi_310           | .....      | .....       | .....       | .....       | .....      | .....      | .....      | .....      |
| PFD0100c_exon1_Kilifi_302           | .....      | .....       | .....       | .....       | .....      | .....      | .....      | .....      |
| PFD0100c_exon1_Kilifi_324           | .....      | .....       | .....       | .....       | .....      | .....      | .....      | .....      |
| PFD0100c_exon1_Kilifi_333           | .....      | .....       | .....       | .....       | .....      | .....      | .....      | .....      |
| PFD0100c_exon1_Kilifi_311           | .....      | .....       | .....       | .....       | .....      | .....      | .....      | .....      |
| PFD0100c_exon1_Kilifi_297           | .....      | .....       | .....       | .....       | .....      | .....      | .....      | .....      |
| PFD0100c_exon1_Kilifi_319           | .....      | .....       | .....       | .....       | .....      | .....      | .....      | .....      |
| PFD0100c_exon1_Kilifi_289           | .....      | .....       | .....       | .....       | .....      | .....      | .....      | .....      |
| PFD0100c_exon1_Kilifi_247           | .....      | .....       | .....       | .....       | .....      | .....      | .....      | .....      |
| PFD0100c_exon1_Kilifi_110           | .....      | .....       | .....       | .....       | .....      | .....      | .....      | .....      |
| PFD0100c_exon1_Kilifi_348           | .....      | .....       | .....       | .....       | .....      | .....      | .....      | .....      |
| PFD0100c_exon1_Kilifi_124           | ....A....  | .....       | .....       | .....       | .....      | .....      | .....      | .....      |
| <i>Plasmodium reichenowi</i> _exon1 | .....AT..  | ..G.G....   | G.....      | C...C...    | G.....A    | G..A.....  | G.AC.....  | G.....     |

|                                     | 1210       | 1220       | 1230       | 1240       | 1250       | 1260      | 1270       | 1280       |
|-------------------------------------|------------|------------|------------|------------|------------|-----------|------------|------------|
| PFD0100c_3D7_exon1                  | GGAAAGGGAG | ATTATGAAGA | TCATCATACA | TATTGTTCTG | GAGATGAATG | TGCATTGGT | AATGCTGTTG | GGGGACAGTT |
| PFD0100c_exon1_Kilifi_062           |            |            |            |            |            |           |            | A.....     |
| PFD0100c_exon1_Kilifi_091           |            |            |            |            |            |           |            | A.....     |
| PFD0100c_exon1_Kilifi_250           |            |            |            |            |            |           |            | A.....     |
| PFD0100c_exon1_Kilifi_314           |            |            |            |            |            |           |            | A.....     |
| PFD0100c_exon1_Kilifi_093           |            |            |            |            |            |           |            | A.....     |
| PFD0100c_exon1_Kilifi_128           |            |            |            |            |            |           |            | A.....     |
| PFD0100c_exon1_Kilifi_186           |            |            |            |            |            |           |            | A.....     |
| PFD0100c_exon1_Kilifi_345           |            |            |            |            |            |           |            | A.....     |
| PFD0100c_exon1_Kilifi_202           |            |            |            |            |            |           |            | A.....     |
| PFD0100c_exon1_Kilifi_290           |            |            |            |            |            |           |            | A.....     |
| PFD0100c_exon1_Kilifi_304           |            |            |            |            |            |           |            | A.....     |
| PFD0100c_exon1_Kilifi_299           |            |            |            |            |            |           |            | A.....     |
| PFD0100c_exon1_Kilifi_082           |            |            |            |            |            |           |            | A.....     |
| PFD0100c_exon1_Kilifi_334           |            |            |            |            |            |           |            | A.....     |
| PFD0100c_exon1_Kilifi_298           |            |            |            |            |            |           |            | A.....     |
| PFD0100c_exon1_Kilifi_105           |            |            |            |            |            |           |            | A.....     |
| PFD0100c_exon1_Kilifi_406           |            |            |            |            |            |           |            | A.....     |
| PFD0100c_exon1_Kilifi_510           |            |            |            |            |            |           |            | A.....     |
| PFD0100c_exon1_Kilifi_164           |            |            |            |            |            |           |            | A.....     |
| PFD0100c_exon1_Kilifi_321           |            |            |            |            |            |           |            | A.....     |
| PFD0100c_exon1_Kilifi_050           |            |            |            |            |            |           |            | A.....     |
| PFD0100c_exon1_Kilifi_344           |            |            |            |            |            |           |            | A.....     |
| PFD0100c_exon1_Kilifi_240           |            |            |            |            |            |           |            | A.....     |
| PFD0100c_exon1_Kilifi_028           |            |            |            |            |            |           |            | A.....     |
| PFD0100c_exon1_Kilifi_356           |            |            |            |            |            |           | T.....     | A.....     |
| PFD0100c_exon1_Kilifi_528           |            |            |            |            |            |           |            | A.....     |
| PFD0100c_exon1_Kilifi_364           |            |            |            |            |            |           |            | A.....     |
| PFD0100c_exon1_Kilifi_057           |            |            |            |            |            |           |            | A.....     |
| PFD0100c_exon1_Kilifi_194           |            |            |            |            |            |           |            | A.....     |
| PFD0100c_exon1_Kilifi_045           |            |            |            |            |            |           |            | A.....     |
| PFD0100c_exon1_Kilifi_214           |            |            |            |            |            |           |            | A.....     |
| PFD0100c_exon1_Kilifi_020           |            | T.....     | T..A..A.   |            |            |           | G...       | A.....     |
| PFD0100c_exon1_Kilifi_023           |            |            |            |            |            |           |            | A.....     |
| PFD0100c_exon1_Kilifi_052           |            |            |            |            |            |           |            | A.....     |
| PFD0100c_exon1_Kilifi_340           |            |            |            |            |            |           |            | A.....     |
| PFD0100c_exon1_Kilifi_027           |            |            |            |            |            |           |            | A.....     |
| PFD0100c_exon1_Kilifi_097           |            |            |            |            |            |           |            | A.....     |
| PFD0100c_exon1_Kilifi_187           |            |            |            |            |            |           |            | A.....     |
| PFD0100c_exon1_Kilifi_201           |            |            |            |            |            |           |            | A.....     |
| PFD0100c_exon1_Kilifi_310           |            |            |            |            |            |           |            | A.....     |
| PFD0100c_exon1_Kilifi_302           |            |            |            |            |            |           |            | A.....     |
| PFD0100c_exon1_Kilifi_324           |            |            |            |            |            |           |            | A.....     |
| PFD0100c_exon1_Kilifi_333           |            |            |            |            |            |           |            | A.....     |
| PFD0100c_exon1_Kilifi_311           |            |            |            |            |            |           |            | A.....     |
| PFD0100c_exon1_Kilifi_297           |            |            |            |            |            |           |            | A.....     |
| PFD0100c_exon1_Kilifi_319           |            |            |            |            |            |           |            | A.....     |
| PFD0100c_exon1_Kilifi_289           |            |            |            |            |            |           |            | A.....     |
| PFD0100c_exon1_Kilifi_247           |            |            |            |            |            |           |            | A.....     |
| PFD0100c_exon1_Kilifi_110           |            |            |            |            |            |           |            | A.....     |
| PFD0100c_exon1_Kilifi_348           |            |            |            |            |            |           |            | A.....     |
| PFD0100c_exon1_Kilifi_124           |            |            |            |            |            |           |            | A.....     |
| <i>Plasmodium reichenowi</i> _exon1 |            | T...G...   | GCA...A.   |            |            | G...      | T.A..C     | AA.AG..TG. |



|                                     | 1290        | 1300        | 1310        | 1320        | 1330        | 1340        | 1350         | 1360        |
|-------------------------------------|-------------|-------------|-------------|-------------|-------------|-------------|--------------|-------------|
| PFD0100c_3D7_exon1                  | ..... ..... | ..... ..... | ..... ..... | ..... ..... | ..... ..... | ..... ..... | ..... .....  | ..... ..... |
| PFD0100c_exon1_Kilifi_062           | TGACGAAAGC  | AGATCTCAAG  | GTAAGCAAAG  | AAGAAAAAAA  | GGGAAAGGAA  | AGGGTAGAAA  | AAAGGTCAT    | AATAAATTAG  |
| PFD0100c_exon1_Kilifi_091           | .....       | .....       | .....       | .....       | .....       | .....       | .....        | .....       |
| PFD0100c_exon1_Kilifi_250           | .....       | .....       | .....       | .....       | .....       | .....       | .....        | .....       |
| PFD0100c_exon1_Kilifi_314           | .....       | .....       | .....       | .....       | .....       | .....       | .....        | .....       |
| PFD0100c_exon1_Kilifi_093           | .....       | .....       | .....       | .....       | .....       | .....       | .....        | .....       |
| PFD0100c_exon1_Kilifi_128           | .....       | .....       | .....       | .....       | .....       | .....       | ---.....C..  | .....       |
| PFD0100c_exon1_Kilifi_186           | .....       | .....       | .....       | .....       | .....       | .....       | .....        | .....       |
| PFD0100c_exon1_Kilifi_345           | .....       | .....       | .....       | .....       | .....       | .....       | ---.....C..  | .....       |
| PFD0100c_exon1_Kilifi_202           | .....       | .....       | .....       | .....       | .....       | .....       | .....        | .....       |
| PFD0100c_exon1_Kilifi_290           | .....       | .....       | .....       | .....       | .....       | .....       | .....        | .....       |
| PFD0100c_exon1_Kilifi_304           | .....       | .....       | .....       | .....       | .....       | .....       | .....        | .....       |
| PFD0100c_exon1_Kilifi_299           | .....       | .....       | .....       | .....       | .....       | .....       | .....        | .....       |
| PFD0100c_exon1_Kilifi_082           | .....       | .....       | .....       | .....       | .....       | .....       | ---.....C..  | .....       |
| PFD0100c_exon1_Kilifi_334           | .....       | .....       | .....       | .....       | .....       | .....       | .....        | .....       |
| PFD0100c_exon1_Kilifi_298           | .....       | .....       | .....       | .....       | .....       | .....       | .....        | .....       |
| PFD0100c_exon1_Kilifi_105           | .....       | .....       | .....       | .....       | .....       | .....       | ---.....C..  | .....       |
| PFD0100c_exon1_Kilifi_406           | .....       | .....       | .....       | .....       | .....       | .....       | .....        | .....       |
| PFD0100c_exon1_Kilifi_510           | .....       | .....       | .....       | .....       | .....       | .....       | .....        | .....       |
| PFD0100c_exon1_Kilifi_164           | .....       | .....       | .....       | .....       | .....       | .....       | .....        | .....       |
| PFD0100c_exon1_Kilifi_321           | .....       | .....       | .....       | .....       | .....       | .....       | ---.....C..  | .....       |
| PFD0100c_exon1_Kilifi_050           | .....       | .....       | .....       | .....       | .....       | .....       | .....        | .....       |
| PFD0100c_exon1_Kilifi_344           | .....       | .....       | .....       | .....       | .....       | .....       | ---.....C..  | .....       |
| PFD0100c_exon1_Kilifi_240           | .....       | .....       | .....       | .....       | .....       | .....       | ---.....C..T | .....       |
| PFD0100c_exon1_Kilifi_028           | .....       | .....       | .....       | .....       | .....       | .....       | ---.....C..  | .....       |
| PFD0100c_exon1_Kilifi_356           | .....       | .....       | .....       | .....       | .....       | .....       | ---.....C..  | .....       |
| PFD0100c_exon1_Kilifi_528           | .....       | .....       | .....       | .....       | .....       | .....       | .....        | .....       |
| PFD0100c_exon1_Kilifi_364           | .....       | .....       | .....       | .....       | .....       | .....       | ---.....C..  | .....       |
| PFD0100c_exon1_Kilifi_057           | .....       | .....       | .....G..... | .....       | .....       | .....       | .....        | .....       |
| PFD0100c_exon1_Kilifi_194           | .....       | .....       | .....       | .....       | .....       | .....       | .....        | .....       |
| PFD0100c_exon1_Kilifi_045           | .....       | .....       | .....       | .....       | .....       | .....       | .....        | .....       |
| PFD0100c_exon1_Kilifi_214           | .....       | .....       | .....       | .....       | .....       | .....       | .....        | .....       |
| PFD0100c_exon1_Kilifi_020           | ...T....TA  | G.G..GG...  | ...T.T..A   | .....       | .....       | .....       | A.....       | ---.....C.. |
| PFD0100c_exon1_Kilifi_023           | .....       | .....       | .....       | .....       | .....       | .....       | .....        | ---.....C.. |
| PFD0100c_exon1_Kilifi_052           | .....       | .....       | .....       | .....       | .....       | .....       | .....        | ---.....C.. |
| PFD0100c_exon1_Kilifi_340           | .....       | .....       | .....       | .....       | .....       | .....       | .....        | .....       |
| PFD0100c_exon1_Kilifi_027           | .....       | .....       | .....       | .....       | .....       | .....       | .....        | .....       |
| PFD0100c_exon1_Kilifi_097           | .....       | .....       | .....       | .....       | .....       | .....       | .....        | .....       |
| PFD0100c_exon1_Kilifi_187           | .....       | .....       | .....       | .....       | .....       | .....       | ---.....C..  | .....       |
| PFD0100c_exon1_Kilifi_201           | .....       | .....       | .....       | .....       | .....       | .....       | ---.....C..  | .....       |
| PFD0100c_exon1_Kilifi_310           | .....       | .....       | .....       | .....       | .....       | .....       | .....        | .....       |
| PFD0100c_exon1_Kilifi_302           | .....       | .....       | .....       | .....       | .....       | .....       | ---.....C..  | .....       |
| PFD0100c_exon1_Kilifi_324           | .....       | .....       | .....       | .....       | .....       | .....       | .....        | .....       |
| PFD0100c_exon1_Kilifi_333           | .....       | .....       | .....       | .....       | .....       | .....       | .....        | .....       |
| PFD0100c_exon1_Kilifi_311           | .....       | .....       | .....       | .....       | .....       | .....       | .....        | .....       |
| PFD0100c_exon1_Kilifi_297           | .....       | .....       | .....       | .....       | .....       | .....       | .....        | .....       |
| PFD0100c_exon1_Kilifi_319           | .....       | .....       | .....       | .....       | .....       | .....       | ---.....C..  | .....       |
| PFD0100c_exon1_Kilifi_289           | .....       | .....       | .....       | .....       | .....       | .....       | .....        | .....       |
| PFD0100c_exon1_Kilifi_247           | .....       | .....       | .....       | .....       | .....       | .....       | ---.....C..  | .....       |
| PFD0100c_exon1_Kilifi_110           | .....       | .....       | .....       | .....       | .....       | .....       | .....        | .....       |
| PFD0100c_exon1_Kilifi_348           | .....       | .....       | .....       | .....       | .....       | .....       | ---.....C..  | .....       |
| PFD0100c_exon1_Kilifi_124           | .....       | .....       | .....       | .....       | .....       | .....       | .....        | .....       |
| <i>Plasmodium reichenowi</i> _exon1 | ...T.G....  | G...T.TC..  | A.....G..A  | .....       | .....       | .....       | .....C..     | ---.....C.. |





|                                     | 1530       | 1540       | 1550       | 1560         | 1570        | 1580        | 1590       | 1600        |
|-------------------------------------|------------|------------|------------|--------------|-------------|-------------|------------|-------------|
| PFD0100c_3D7_exon1                  | .... ....  | .... ....  | .... ....  | .... ....    | .... ....   | .... ....   | .... ....  | .... ....   |
| PFD0100c_exon1_Kilifi_062           | AAAAGACGAA | TTTATCATAG | AAGGTGGTCG | TTTTATCCGT   | ACATCAATTA  | ATGATGTTCC  | ACAAATGGAA | GCTATAACTA  |
| PFD0100c_exon1_Kilifi_091           | .....      | .....      | .....      | .....        | .....       | .....       | .....      | .....       |
| PFD0100c_exon1_Kilifi_250           | .....T.    | .....      | .....      | .....        | .....       | .....       | .....      | .....       |
| PFD0100c_exon1_Kilifi_314           | .....      | .....      | .....      | .....        | .....       | .....       | .....      | .....       |
| PFD0100c_exon1_Kilifi_093           | .....      | .....      | .....      | .....        | .....       | .....       | .....      | .....       |
| PFD0100c_exon1_Kilifi_128           | ...A.ACT.  | .....A     | ...G.G.    | GG.....      | .....       | .....       | .....      | .....       |
| PFD0100c_exon1_Kilifi_186           | .....      | .....      | .....      | .....        | .....       | .....       | .....      | .....       |
| PFD0100c_exon1_Kilifi_345           | .....      | .....      | .....      | .....        | .....       | .....       | .....      | .....C...   |
| PFD0100c_exon1_Kilifi_202           | .....      | .....      | .....      | .....        | .....       | .....       | .....      | .....       |
| PFD0100c_exon1_Kilifi_290           | .....      | .....      | .....      | .....        | .....       | .....       | .....      | .....       |
| PFD0100c_exon1_Kilifi_304           | .....      | .....      | .....      | .....        | .....       | .....       | .....      | .....       |
| PFD0100c_exon1_Kilifi_299           | .....      | .....      | .....      | .....        | .....       | .....       | .....      | .....       |
| PFD0100c_exon1_Kilifi_082           | .....      | .....      | .....      | .....        | .....       | .....       | .....      | .....       |
| PFD0100c_exon1_Kilifi_334           | .....      | .....      | .....      | .....        | .....       | .....       | .....      | .....       |
| PFD0100c_exon1_Kilifi_298           | .....T.    | .....      | .....      | .....        | .....       | .....       | .....      | .....       |
| PFD0100c_exon1_Kilifi_105           | .....      | .....      | .....      | .....        | .....       | .....       | .....A.    | .....T..... |
| PFD0100c_exon1_Kilifi_406           | .....T.    | .....      | .....      | .....        | .....       | .....       | .....      | .....       |
| PFD0100c_exon1_Kilifi_510           | .....      | .....      | .....      | .....        | .....       | .....       | .....      | .....       |
| PFD0100c_exon1_Kilifi_164           | .....      | .....      | .....      | .....        | .....       | .....       | .....      | .....       |
| PFD0100c_exon1_Kilifi_321           | .....      | .....      | .....      | .....        | .....       | .....       | .....      | .....       |
| PFD0100c_exon1_Kilifi_050           | .....      | .....      | .....      | .....        | .....       | .....       | .....      | .....       |
| PFD0100c_exon1_Kilifi_344           | ...C.AAC.  | ...G.....  | ...A...    | ...G...GGA.. | ...T.....   | ...A.CA...  | ...A.....  | ...G.T...   |
| PFD0100c_exon1_Kilifi_240           | .....      | .....      | .....      | .....        | .....       | .....       | .....      | .....       |
| PFD0100c_exon1_Kilifi_028           | .....      | .....      | .....      | .....        | .....       | .....       | .....      | .....       |
| PFD0100c_exon1_Kilifi_356           | .....      | .....      | .....      | .....        | .....       | .....       | .....      | .....       |
| PFD0100c_exon1_Kilifi_528           | .....      | .....      | .....      | .....        | .....       | .....       | .....      | .....       |
| PFD0100c_exon1_Kilifi_364           | .....      | .....      | .....      | .....        | .....       | .....       | .....      | .....       |
| PFD0100c_exon1_Kilifi_057           | .....      | .....      | .....      | .....        | .....       | .....       | .....      | .....       |
| PFD0100c_exon1_Kilifi_194           | .....      | .....      | .....      | .....        | .....       | .....       | .....      | .....       |
| PFD0100c_exon1_Kilifi_045           | .....      | .....      | .....      | .....        | .....       | .....       | .....      | .....C...   |
| PFD0100c_exon1_Kilifi_214           | .....      | .....      | .....      | .....        | .....       | .....       | .....      | .....       |
| PFD0100c_exon1_Kilifi_020           | ...C.AAC.  | ...G.....  | ...AAA.AC  | ...G.A.GAA.. | ...TGGA.... | ...G G..... | ...A.....  | ...A.G.T... |
| PFD0100c_exon1_Kilifi_023           | .....T.    | .....      | .....      | .....        | .....       | .....       | .....      | .....       |
| PFD0100c_exon1_Kilifi_052           | .....      | .....      | .....      | .....        | .....       | .....       | .....      | .....       |
| PFD0100c_exon1_Kilifi_340           | .....      | .....      | .....      | .....        | .....       | .....       | .....      | .....       |
| PFD0100c_exon1_Kilifi_027           | .....      | .....      | .....      | .....        | .....       | .....       | .....      | .....       |
| PFD0100c_exon1_Kilifi_097           | .....      | .....      | .....      | .....        | .....       | .....       | .....      | .....       |
| PFD0100c_exon1_Kilifi_187           | .....      | .....      | .....      | .....        | .....       | .....       | .....      | .....       |
| PFD0100c_exon1_Kilifi_201           | .....      | .....      | .....      | .....        | .....       | .....       | .....      | .....       |
| PFD0100c_exon1_Kilifi_310           | .....      | .....      | .....      | .....        | .....       | .....       | .....      | .....       |
| PFD0100c_exon1_Kilifi_302           | .....      | .....      | .....      | .....        | .....       | .....       | .....      | .....       |
| PFD0100c_exon1_Kilifi_324           | .....T.    | .....      | .....      | .....        | .....       | .....       | .....      | .....       |
| PFD0100c_exon1_Kilifi_333           | .....      | .....      | .....      | .....        | .....       | .....       | .....      | .....       |
| PFD0100c_exon1_Kilifi_311           | .....      | .....      | .....      | .....        | .....       | .....       | .....      | .....       |
| PFD0100c_exon1_Kilifi_297           | .....      | .....      | .....      | .....        | .....       | .....       | .....      | .....       |
| PFD0100c_exon1_Kilifi_319           | .....      | .....      | .....      | .....        | .....       | .....       | .....      | .....       |
| PFD0100c_exon1_Kilifi_289           | .....      | .....      | .....      | .....        | .....       | .....       | .....      | .....       |
| PFD0100c_exon1_Kilifi_247           | .....      | .....      | .....      | .....        | .....       | .....       | .....      | .....       |
| PFD0100c_exon1_Kilifi_110           | .....      | .....      | .....      | .....        | .....       | .....       | .....      | .....       |
| PFD0100c_exon1_Kilifi_348           | .....      | .....      | .....      | .....        | .....       | .....       | .....      | .....       |
| PFD0100c_exon1_Kilifi_124           | .....      | .....      | .....      | .....        | .....       | .....       | .....      | .....       |
| <i>Plasmodium reichenowi</i> _exon1 | T.C...A... | .....      | .T..GAA.AC | .G.A.GAAAA   | .TTCT.....  | G....C....  | .A.....    | .A.GCT..C.  |

|                                     | 1610       | 1620       | 1630       | 1640       | 1650       | 1660       | 1670       | 1680       |
|-------------------------------------|------------|------------|------------|------------|------------|------------|------------|------------|
| PFD0100c_3D7_exon1                  | .... ....  | .... ....  | .... ....  | .... ....  | .... ....  | .... ....  | .... ....  | .... ....  |
| PFD0100c_exon1_Kilifi_062           | ACAAATATAT | GCCTGGATCC | ATTTATGAAA | ATCCTTCATC | TGGTAGTTCA | CATATTGAAG | ATAAAGGACA | ATTAAAAGAT |
| PFD0100c_exon1_Kilifi_091           | .....      | .....      | .....      | .....      | .....      | .....      | .....      | .....      |
| PFD0100c_exon1_Kilifi_250           | .....      | .....      | .....      | .....      | .....      | .....G..   | .....TT... | .....      |
| PFD0100c_exon1_Kilifi_314           | .....      | .....      | .....      | .....      | .....      | .....      | .....      | .....      |
| PFD0100c_exon1_Kilifi_093           | .....      | .....      | .....      | .....      | .....      | .....G..   | .....TT... | .....      |
| PFD0100c_exon1_Kilifi_128           | .....      | .....      | .....      | .....      | .....      | .....G..   | .....TT... | .....      |
| PFD0100c_exon1_Kilifi_186           | .....      | .....      | .....      | .....      | .....      | .....      | .....      | .....      |
| PFD0100c_exon1_Kilifi_345           | .....      | .....      | .....      | .....      | .....      | .....      | .....      | .....      |
| PFD0100c_exon1_Kilifi_202           | .....      | .....      | .....      | .....      | .....      | .....      | .....      | .....      |
| PFD0100c_exon1_Kilifi_290           | .....      | .....      | .....      | .....      | .....      | .....      | .....      | .....      |
| PFD0100c_exon1_Kilifi_304           | .....      | .....      | .....      | .....      | .....      | .....      | .....      | .....      |
| PFD0100c_exon1_Kilifi_299           | .....      | .....      | .....      | .....      | .....      | .....      | .....      | .....      |
| PFD0100c_exon1_Kilifi_082           | .....      | .....      | .....      | .....      | .....      | .....      | .....      | .....      |
| PFD0100c_exon1_Kilifi_334           | .....      | .....      | .....      | .....      | .....      | .....      | .....      | .....      |
| PFD0100c_exon1_Kilifi_298           | .....      | .....      | .....      | .....      | .....      | .....      | .....      | .....      |
| PFD0100c_exon1_Kilifi_105           | .....      | .....      | .....      | .....      | .....      | .....      | .....      | .....      |
| PFD0100c_exon1_Kilifi_406           | .....      | .....      | .....      | .....      | .....      | .....      | .....      | .....      |
| PFD0100c_exon1_Kilifi_510           | .....      | .....      | .....      | .....      | .....      | .....      | .....      | .....      |
| PFD0100c_exon1_Kilifi_164           | .....      | .....      | .....      | .....      | .....      | .....      | .....      | .....      |
| PFD0100c_exon1_Kilifi_321           | .....      | .....      | .....      | .....      | .....      | .....      | .....      | .....      |
| PFD0100c_exon1_Kilifi_050           | .....      | .....      | .....      | .....      | .....      | .....      | .....      | .....      |
| PFD0100c_exon1_Kilifi_344           | G..T.G.C.G | C..CAA.GG. | ...A....G  | T.....     | ..T.G..G.. | .G.G.....  | .....G..   | .....TT... |
| PFD0100c_exon1_Kilifi_240           | .....      | .....      | .....      | .....      | .....      | .....      | .....      | .....      |
| PFD0100c_exon1_Kilifi_028           | .....      | .....      | .....      | .....      | .....      | .....      | .....      | .....      |
| PFD0100c_exon1_Kilifi_356           | .....      | .....      | .....      | .....      | .....      | .....      | .....      | .....      |
| PFD0100c_exon1_Kilifi_528           | .....      | .....      | .....      | .....      | .....      | .....      | .....      | .....      |
| PFD0100c_exon1_Kilifi_364           | .....      | .....      | .....      | .....      | .....      | .....      | .....      | .....      |
| PFD0100c_exon1_Kilifi_057           | .....      | .....      | .....      | .....      | .....      | .....G..   | .....TT... | .....      |
| PFD0100c_exon1_Kilifi_194           | .....      | .....      | .....      | .....      | .....      | .....G..   | .....TT... | .....      |
| PFD0100c_exon1_Kilifi_045           | .....      | .....      | .....      | .....      | .....      | .....G..   | .....TT... | .....      |
| PFD0100c_exon1_Kilifi_214           | .....      | .....      | .....      | .....      | .....      | .....G..   | .....TT... | .....      |
| PFD0100c_exon1_Kilifi_020           | GT.T.G..T. | ...CAA.G.. | ...A....G  | T.....     | ..T.G..G.. | ...C.....  | .....A..   | .....TT... |
| PFD0100c_exon1_Kilifi_023           | .....      | .....      | .....      | .....      | .....      | .....      | .....      | .....      |
| PFD0100c_exon1_Kilifi_052           | .....      | .....      | .....      | .....      | .....      | .....G..   | .....TT... | .....      |
| PFD0100c_exon1_Kilifi_340           | .....      | .....      | .....      | .....      | .....      | .....G..   | .....TT... | .....      |
| PFD0100c_exon1_Kilifi_027           | .....      | .....      | .....      | .....      | .....      | .....      | .....      | .....      |
| PFD0100c_exon1_Kilifi_097           | .....      | .....      | .....      | .....      | .....      | .....G..   | .....TT... | .....      |
| PFD0100c_exon1_Kilifi_187           | .....      | .....      | .....      | .....      | .....      | .....      | .....      | .....      |
| PFD0100c_exon1_Kilifi_201           | .....      | .....      | .....      | .....      | .....      | .....      | .....      | .....      |
| PFD0100c_exon1_Kilifi_310           | .....      | .....      | .....      | .....      | .....      | .....      | .....      | .....      |
| PFD0100c_exon1_Kilifi_302           | .....      | .....      | .....      | .....      | .....      | .....      | .....TT... | .....      |
| PFD0100c_exon1_Kilifi_324           | .....      | .....      | .....      | .....      | .....      | .....      | .....      | .....      |
| PFD0100c_exon1_Kilifi_333           | .....      | .....      | .....      | .....      | .....      | .....G..   | .....TT... | .....      |
| PFD0100c_exon1_Kilifi_311           | .....      | .....C..   | .....      | .....      | .....      | .....G..   | .....TT... | .....      |
| PFD0100c_exon1_Kilifi_297           | .....      | .....      | .....      | .....      | .....      | .....      | .....      | .....      |
| PFD0100c_exon1_Kilifi_319           | .....      | .....      | .....      | .....      | .....      | .....      | .....      | .....      |
| PFD0100c_exon1_Kilifi_289           | .....      | .....      | .....      | .....      | .....      | .....G..   | .....TT... | .....      |
| PFD0100c_exon1_Kilifi_247           | .....      | .....      | .....      | .....      | .....      | .....      | .....      | .....      |
| PFD0100c_exon1_Kilifi_110           | .....      | .....      | .....      | .....      | .....      | .....G..   | .....TT... | .....      |
| PFD0100c_exon1_Kilifi_348           | .....      | .....      | .....      | .....      | .....      | .....G..   | .....TT... | .....      |
| PFD0100c_exon1_Kilifi_124           | .....      | .....      | .....      | .....      | .....      | .....      | .....      | .....      |
| <i>Plasmodium reichenowi</i> _exon1 | .A..G...G  | C..A..AA.  | .....A.G   | T.....C.   | ..T.G..GT. | ...A.....  | ...CG...TC | T...TT.A.. |

|                                     | 1690        | 1700        | 1710        | 1720        | 1730        | 1740        | 1750        | 1760                  |
|-------------------------------------|-------------|-------------|-------------|-------------|-------------|-------------|-------------|-----------------------|
| PFD0100c_3D7_exon1                  | ..... ..... | ..... ..... | ..... ..... | ..... ..... | ..... ..... | ..... ..... | ..... ..... | ..... .....           |
| PFD0100c_exon1_Kilifi_062           | TTC         | ACTATTG     | AAACAGTCAA  | ATATACATCA  | GATGGACTTA  | ATGGATTGA   | TCATGAAGAA  | CCAGTGACA- --GATCCTAA |
| PFD0100c_exon1_Kilifi_091           | .....       | .....G...   | .....       | .....       | .....       | .....T.     | G.....      | .....                 |
| PFD0100c_exon1_Kilifi_250           | .....       | .....       | .....       | .....       | .....       | .....T.     | G.....      | .....                 |
| PFD0100c_exon1_Kilifi_314           | .....       | .....       | .....       | .....       | .....       | .....T.     | G.....      | .....                 |
| PFD0100c_exon1_Kilifi_093           | .....       | .....       | .....       | .....       | .....       | .....T.     | G.....      | .....                 |
| PFD0100c_exon1_Kilifi_128           | .....       | .GC.G..T.T  | ...CA...T   | ...A.AAC.   | .....T      | .....       | .....       | .....                 |
| PFD0100c_exon1_Kilifi_186           | .....       | .....       | .....       | T.....      | .....       | .....T.     | G.....      | .....                 |
| PFD0100c_exon1_Kilifi_345           | .....       | .....       | .....       | .....       | .....       | .....T.     | G.....      | .....                 |
| PFD0100c_exon1_Kilifi_202           | .....       | .....G...   | .....       | .....       | .....       | .....T.     | G.....      | .....                 |
| PFD0100c_exon1_Kilifi_290           | .....       | .....       | .....       | .....       | .....       | .....       | .....       | .....                 |
| PFD0100c_exon1_Kilifi_304           | .....       | .....       | .....       | .....       | .....       | .....T.     | G.....      | .....                 |
| PFD0100c_exon1_Kilifi_299           | .....       | .....       | .....       | .....       | .....       | .....       | .....       | .....                 |
| PFD0100c_exon1_Kilifi_082           | .....       | .....       | .....       | .....       | .....       | .....T.     | G.....      | .....                 |
| PFD0100c_exon1_Kilifi_334           | .....       | .....       | .....       | .....       | .....       | .....T.     | G.....      | .....                 |
| PFD0100c_exon1_Kilifi_298           | .....       | .....       | .....       | .....       | .....       | .....T.     | G.....      | .....                 |
| PFD0100c_exon1_Kilifi_105           | .....       | .....       | .....       | .....       | .....       | .....T.     | G.....      | .....                 |
| PFD0100c_exon1_Kilifi_406           | .....       | .....       | .....       | .....       | .....       | .....T.     | G.....      | .....                 |
| PFD0100c_exon1_Kilifi_510           | .....       | .....       | .....       | .....       | .....       | .....T.     | G.....      | .....                 |
| PFD0100c_exon1_Kilifi_164           | .....       | .....       | .....       | .....       | .....       | .....T.     | G.....      | .....                 |
| PFD0100c_exon1_Kilifi_321           | .....       | .....       | .....       | .....       | .....       | .....T.     | G.....      | .....                 |
| PFD0100c_exon1_Kilifi_050           | .....       | .....       | .....       | .....       | .....       | .....T.     | G.....      | .....                 |
| PFD0100c_exon1_Kilifi_344           | .....       | .GC.G..T.T  | ...CA...T   | ...A.AAC.   | .....T      | .....       | .....       | .....                 |
| PFD0100c_exon1_Kilifi_240           | .....       | .....       | .....       | .....       | .....       | .....T.     | G.....      | .....                 |
| PFD0100c_exon1_Kilifi_028           | .....       | .....       | .....       | .....       | .....       | .....T.     | G.....      | .....                 |
| PFD0100c_exon1_Kilifi_356           | .....       | .....       | .....       | .....       | .....       | .....T.     | G.....      | .....                 |
| PFD0100c_exon1_Kilifi_528           | .....       | .....       | .....       | .....       | .....       | .....       | .....       | .....                 |
| PFD0100c_exon1_Kilifi_364           | .....       | .....       | .....       | .....       | .....T      | .....       | .....       | .....                 |
| PFD0100c_exon1_Kilifi_057           | .....       | .GC.G..T.T  | ...CA...T   | ...A.AAC.   | .....T      | .....       | .....       | .....                 |
| PFD0100c_exon1_Kilifi_194           | .....       | .....       | .....       | .....       | .....       | .....T.     | G.....      | .....                 |
| PFD0100c_exon1_Kilifi_045           | .....       | .....       | .....       | .....       | .....       | .....T.     | G.....      | .....                 |
| PFD0100c_exon1_Kilifi_214           | .....       | .GC.G..T.T  | ...CA...T   | ...A.AAC.   | .....T      | .....       | .....       | .....                 |
| PFD0100c_exon1_Kilifi_020           | .....C...C  | ...C.G..T.T | ...C...T    | ...A.AACG   | ...C...T    | .....T.     | G.....T     | AC.....               |
| PFD0100c_exon1_Kilifi_023           | .....       | .....       | .....       | .....       | .....       | .....T.     | G.....T     | AC.....               |
| PFD0100c_exon1_Kilifi_052           | .....       | .....       | .....       | .....       | .....       | .....T.     | G.....      | .....                 |
| PFD0100c_exon1_Kilifi_340           | .....       | .GC.G..T.T  | ...CA...T   | ...A.AAC.   | .....T      | .....       | .....       | .....                 |
| PFD0100c_exon1_Kilifi_027           | .....       | .....       | .....       | .....       | .....       | .....T.     | G.....      | .....                 |
| PFD0100c_exon1_Kilifi_097           | .....       | .GC.G..T.T  | ...CA...T   | ...A.AAC.   | .....T      | .....       | .....       | .....                 |
| PFD0100c_exon1_Kilifi_187           | .....       | .....       | .....       | .....       | .....       | .....T.     | G.....      | .....                 |
| PFD0100c_exon1_Kilifi_201           | .....       | .....       | .....       | .....       | .....       | .....       | .....       | .....                 |
| PFD0100c_exon1_Kilifi_310           | .....       | .....       | .....       | .....       | .....       | .....T.     | G.....      | .....                 |
| PFD0100c_exon1_Kilifi_302           | .....C...C  | ...C.G..T.T | ...C...T    | ...A.AACG   | ...C...T    | .....T.     | G.....T     | AC.....               |
| PFD0100c_exon1_Kilifi_324           | .....       | .....       | .....       | .....       | .....       | .....T.     | G.....      | .....                 |
| PFD0100c_exon1_Kilifi_333           | .....       | .GC.G..T.T  | ...CA...T   | ...A.AAC.   | .....T      | .....       | .....       | .....                 |
| PFD0100c_exon1_Kilifi_311           | .....       | .....       | .....       | .....       | .....       | .....T.     | G.....      | .....                 |
| PFD0100c_exon1_Kilifi_297           | .....       | .....       | .....       | .....       | .....       | .....T.     | G.....      | .....                 |
| PFD0100c_exon1_Kilifi_319           | .....       | .....       | .....       | .....       | .....       | .....       | .....       | .....                 |
| PFD0100c_exon1_Kilifi_289           | .....       | .GC.G..T.T  | ...CA...T   | ...A.AAC.   | .....T      | .....       | .....       | .....                 |
| PFD0100c_exon1_Kilifi_247           | .....       | .....       | .....       | .....       | .....       | .....T.     | G.....      | .....                 |
| PFD0100c_exon1_Kilifi_110           | .....       | .GC.G..T.T  | ...CA...T   | ...A.AAC.   | .....T      | .....       | .....       | .....                 |
| PFD0100c_exon1_Kilifi_348           | .....       | .GC.G..T.T  | ...CA...T   | ...A.AAC.   | .....T      | .....       | .....       | .....                 |
| PFD0100c_exon1_Kilifi_124           | .....       | .....       | .....       | .....       | .....       | .....T.     | G.....      | .....                 |
| <i>Plasmodium reichenowi</i> _exon1 | ...T....    | ...C.G.CT.. | ...C...AT   | ..G...AAC.  | .....T      | .....T.     | G.....G     | AC.....C.             |



|                                     | 1850       | 1860       | 1870       | 1880       | 1890       | 1900        | 1910       | 1920       |
|-------------------------------------|------------|------------|------------|------------|------------|-------------|------------|------------|
| PFD0100c_3D7_exon1                  | ATGGTAGTCC | AATACCACGT | CGACGTTTTT | CAAGAAGCTA | TCCATTAAAT | ACTACAACCTA | CATTGGAAGG | TACATCTCAA |
| PFD0100c_exon1_Kilifi_062           | .....A.    | .....G     | .....G     | .....G     | .....G     | .....G      | .....G     | .....G     |
| PFD0100c_exon1_Kilifi_091           | .....A.    | .....G     | .....G     | .....G     | .....G     | .....G      | .....G     | .....G     |
| PFD0100c_exon1_Kilifi_250           | .....A.    | .....G     | .....G     | .....G     | .....G     | .....G      | .....G     | .....G     |
| PFD0100c_exon1_Kilifi_314           | .....A.    | .....G     | .....G     | .....G     | .....G     | .....G      | .....G     | .....G     |
| PFD0100c_exon1_Kilifi_093           | .....A.    | .....G     | .....G     | .....G     | .....G     | .....G      | .....G     | .....G     |
| PFD0100c_exon1_Kilifi_128           | .....A.    | .....G     | .....G     | .....G     | .....G     | .....G      | .....G     | .....G     |
| PFD0100c_exon1_Kilifi_186           | .....A.    | .....G     | .....G     | .....G     | .....G     | .....G      | .....G     | .....G     |
| PFD0100c_exon1_Kilifi_345           | .....A.    | .....G     | .....G     | .....G     | .....G     | .....G      | .....G     | .....G     |
| PFD0100c_exon1_Kilifi_202           | .....A.    | .....G     | .....G     | .....G     | .....G     | .....G      | .....G     | .....A.    |
| PFD0100c_exon1_Kilifi_290           | .....A.    | .....G     | .....G     | .....G     | .....G     | .....G      | .....G     | .....A.    |
| PFD0100c_exon1_Kilifi_304           | .....A.    | .....G     | .....G     | .....G     | .....G     | .....G      | .....G     | .....A.    |
| PFD0100c_exon1_Kilifi_299           | .....A.    | .....G     | .....G     | .....G     | .....G     | .....G      | .....G     | .....A.    |
| PFD0100c_exon1_Kilifi_082           | .....A.    | .....G     | .....G     | .....G     | .....G     | .....G      | .....G     | .....A.    |
| PFD0100c_exon1_Kilifi_334           | .....A.    | .....G     | .....G     | .....G     | .....G     | .....G      | .....G     | .....A.    |
| PFD0100c_exon1_Kilifi_298           | .....A.    | .....G     | .....G     | .....G     | .....G     | .....G      | .....G     | .....A.    |
| PFD0100c_exon1_Kilifi_105           | .....A.    | .....G     | .....G     | .....G     | .....G     | .....G      | .....G     | .....A.    |
| PFD0100c_exon1_Kilifi_406           | .....A.    | .....G     | .....G     | .....G     | .....G     | .....G      | .....G     | .....A.    |
| PFD0100c_exon1_Kilifi_510           | .....A.    | .....G     | .....G     | .....G     | .....G     | .....G      | .....G     | .....A.    |
| PFD0100c_exon1_Kilifi_164           | .....A.    | .....G     | .....G     | .....G     | .....G     | .....G      | .....G     | .....A.    |
| PFD0100c_exon1_Kilifi_321           | .....A.    | .....G     | .....G     | .....G     | .....G     | .....G      | .....G     | .....A.    |
| PFD0100c_exon1_Kilifi_050           | .....A.    | .....G     | .....G     | .....G     | .....G     | .....G      | .....G     | .....A.    |
| PFD0100c_exon1_Kilifi_344           | .....A.    | .....G     | .....G     | .....G     | .....G     | .....G      | .....G     | .....A.    |
| PFD0100c_exon1_Kilifi_240           | .....A.    | .....G     | .....G     | .....G     | .....G     | .....G      | .....G     | .....A.    |
| PFD0100c_exon1_Kilifi_028           | .....A.    | .....G     | .....G     | .....G     | .....G     | .....G      | .....G     | .....A.    |
| PFD0100c_exon1_Kilifi_356           | .....A.    | .....G     | .....G     | .....G     | .....G     | .....G      | .....G     | .....A.    |
| PFD0100c_exon1_Kilifi_528           | .....A.    | .....G     | .....G     | .....G     | .....G     | .....G      | .....G     | .....A.    |
| PFD0100c_exon1_Kilifi_364           | .....A.    | .....G     | .....G     | .....G     | .....G     | .....G      | .....G     | .....A.    |
| PFD0100c_exon1_Kilifi_057           | .....A.    | .....G     | .....G     | .....G     | .....G     | .....G      | .....G     | .....A.    |
| PFD0100c_exon1_Kilifi_194           | .....A.    | .....G     | .....G     | .....G     | .....G     | .....G      | .....G     | .....A.    |
| PFD0100c_exon1_Kilifi_045           | .....A.    | .....G     | .....G     | .....G     | .....G     | .....G      | .....G     | .....A.    |
| PFD0100c_exon1_Kilifi_214           | .....A.    | .....G     | .....G     | .....G     | .....G     | .....G      | .....G     | .....A.    |
| PFD0100c_exon1_Kilifi_020           | .C...A...  | .....A.    | .A.G.....  | ..CC...G.. | .T...C...  | .G..T...T   | ..A.A..... | .....A.C   |
| PFD0100c_exon1_Kilifi_023           | .....A.    | .....G     | .....G     | .....G     | .....G     | .....G      | .....G     | .....A.    |
| PFD0100c_exon1_Kilifi_052           | .....A.    | .....G     | .....G     | .....G     | .....G     | .....G      | .....G     | .....A.    |
| PFD0100c_exon1_Kilifi_340           | .....A.    | .....G     | .....G     | .....G     | .....G     | .....G      | .....G     | .....A.    |
| PFD0100c_exon1_Kilifi_027           | .....A.    | .....G     | .....G     | .....G     | .....G     | .....G      | .....G     | .....A.    |
| PFD0100c_exon1_Kilifi_097           | .....A.    | .....G     | .....G     | .....G     | .....G     | .....G      | .....G     | .....A.    |
| PFD0100c_exon1_Kilifi_187           | .....A.    | .....G     | .....G     | .....G     | .....G     | .....G      | .....G     | .....A.    |
| PFD0100c_exon1_Kilifi_201           | .....A.    | .....G     | .....G     | .....G     | .....G     | .....G      | .....G     | .....A.    |
| PFD0100c_exon1_Kilifi_310           | .....A.    | .....G     | .....G     | .....G     | .....G     | .....G      | .....G     | .....A.    |
| PFD0100c_exon1_Kilifi_302           | .....A.    | .....G     | .....G     | .....G     | .....G     | .....G      | .....G     | .....A.    |
| PFD0100c_exon1_Kilifi_324           | .....A.    | .....G     | .....G     | .....G     | .....G     | .....G      | .....G     | .....A.    |
| PFD0100c_exon1_Kilifi_333           | .....A.    | .....G     | .....G     | .....G     | .....G     | .....G      | .....G     | .....A.    |
| PFD0100c_exon1_Kilifi_311           | .....A.    | .....G     | .....G     | .....G     | .....G     | .....G      | .....G     | .....A.    |
| PFD0100c_exon1_Kilifi_297           | .....A.    | .....G     | .....G     | .....G     | .....G     | .....G      | .....G     | .....A.    |
| PFD0100c_exon1_Kilifi_319           | .....A.    | .....G     | .....G     | .....G     | .....G     | .....G      | .....G     | .....A.    |
| PFD0100c_exon1_Kilifi_289           | .....A.    | .....G     | .....G     | .....G     | .....G     | .....G      | .....G     | .....A.    |
| PFD0100c_exon1_Kilifi_247           | .....A.    | .....G     | .....G     | .....G     | .....G     | .....G      | .....G     | .....A.    |
| PFD0100c_exon1_Kilifi_110           | .....A.    | .....G     | .....G     | .....G     | .....G     | .....G      | .....G     | .....A.    |
| PFD0100c_exon1_Kilifi_348           | .....A.    | .....G     | .....G     | .....G     | .....G     | .....G      | .....G     | .....A.    |
| PFD0100c_exon1_Kilifi_124           | .....A.    | .....G     | .....G     | .....G     | .....G     | .....G      | .....G     | .....A.    |
| <i>Plasmodium reichenowi</i> _exon1 | .....A.    | .....TA.   | GA.....    | ..C...G..  | .T...C...  | ...TG.A.T   | ..A.A..... | .GA...A.C  |



|                                     | 1930       | 1940       | 1950       | 1960       | 1970      | 1980       | 1990       | 2000        |
|-------------------------------------|------------|------------|------------|------------|-----------|------------|------------|-------------|
| PFD0100c_3D7_exon1                  | AAACCATCTG | CAGTTGAAAC | AATAATGTC  | CTATTTAGAA | ATATTTTGA | TTCTATAAAA | AGTTCTTCAA | TAAC TAGAAG |
| PFD0100c_exon1_Kilifi_062           | .....A     | .TA.....T  | .T...C...T | .....GA..  | .T.....   |            |            | G.....      |
| PFD0100c_exon1_Kilifi_091           | .....A     | .....      |            |            | .T.....   |            |            | G.....      |
| PFD0100c_exon1_Kilifi_250           |            |            |            | .T.....    | .T.....   |            |            | G.....      |
| PFD0100c_exon1_Kilifi_314           |            |            |            |            | .T.....   |            |            | G.....      |
| PFD0100c_exon1_Kilifi_093           |            |            |            |            | .T.....   |            |            | G.....      |
| PFD0100c_exon1_Kilifi_128           |            |            |            |            | .T.....   |            |            | G.....      |
| PFD0100c_exon1_Kilifi_186           |            |            |            | .T.....    | .T.....   |            |            | G.....      |
| PFD0100c_exon1_Kilifi_345           |            |            |            |            | .T.....   |            |            | G.....A..   |
| PFD0100c_exon1_Kilifi_202           | .....A     | .TA....T   | .T...C...T | .....GA..  | .T.....   |            |            | G.....      |
| PFD0100c_exon1_Kilifi_290           | .....TA    | .....      |            | .....A..   | .T.....   |            |            | G.....      |
| PFD0100c_exon1_Kilifi_304           | .....A     | .TA....T   | .T...C...T | .....GA..  | .T.....   |            |            | G.....      |
| PFD0100c_exon1_Kilifi_299           |            |            |            |            |           |            |            | G.....      |
| PFD0100c_exon1_Kilifi_082           | .....A     | .TA....T   | .T...C...T | .....GA..  | .T.....   |            |            | G.....      |
| PFD0100c_exon1_Kilifi_334           | .....A     | .TA....T   | .T...C...T | .....GA..  | .T.....   |            |            | G.....      |
| PFD0100c_exon1_Kilifi_298           | .....A     | .TA....T   | .T...C...T | .....GA..  | .T.....   |            |            | G.....      |
| PFD0100c_exon1_Kilifi_105           | .....A     | .TA....T   | .T...C...T | .....GA..  | .T.....   |            |            | G.....      |
| PFD0100c_exon1_Kilifi_406           | .....A     | .TA....T   | .T...C...T | .....GA..  | .T.....   |            |            | G.....      |
| PFD0100c_exon1_Kilifi_510           | .....A     | .TA....T   | .T...C...T | .....GA..  | .T.....   |            |            | G.....      |
| PFD0100c_exon1_Kilifi_164           | .....A     | .TA....T   | .T...C...T | .....GA..  | .T.....   |            |            | G.....      |
| PFD0100c_exon1_Kilifi_321           | .....A     | .TA....T   | .T...C...T | .....GA..  | .T.....   |            |            | G.....      |
| PFD0100c_exon1_Kilifi_050           | .....A     | .TA....T   | .T...C...T | .....GA..  | .T.....   |            |            | G.....      |
| PFD0100c_exon1_Kilifi_344           | .....A     | .TA....T   | .T...C...T | .....GA..  | .T.....   |            |            | G.....      |
| PFD0100c_exon1_Kilifi_240           | .....A     | .TA....T   | .T...C...T | .....GA..  | .T.....   |            |            | G.....      |
| PFD0100c_exon1_Kilifi_028           | .....A     | .TA....T   | .T...C...T | .....GA..  | .T.....   |            |            | G.....      |
| PFD0100c_exon1_Kilifi_356           | .....A     | .TA....T   | .T...C...T | .....GA..  | .T.....   |            |            | G.....      |
| PFD0100c_exon1_Kilifi_528           |            |            |            | .T.....    | .T.....   |            |            | G.....      |
| PFD0100c_exon1_Kilifi_364           |            |            |            | .T.....    | .T.....   |            |            | G.....      |
| PFD0100c_exon1_Kilifi_057           |            |            |            | .T.....    | .T.....   |            |            | G.....      |
| PFD0100c_exon1_Kilifi_194           |            |            |            | .T.....    | .T.....   |            |            | G.....      |
| PFD0100c_exon1_Kilifi_045           |            |            |            | .T.....    | .T.....   |            |            | G.....      |
| PFD0100c_exon1_Kilifi_214           |            |            |            |            |           |            |            | G.....      |
| PFD0100c_exon1_Kilifi_020           | .TGT...A   | .A....T    | .T...C...T | A..A..G... | .T..G.... | .G.C....G. | .A....GT.. | .T...A...   |
| PFD0100c_exon1_Kilifi_023           | .....A     | .TA....T   | .T...C...T | .....GA..  | .T.....   |            |            | G.....      |
| PFD0100c_exon1_Kilifi_052           |            |            |            | .T.....    | .T.....   |            |            | G.....      |
| PFD0100c_exon1_Kilifi_340           |            |            |            |            |           |            |            | G.....      |
| PFD0100c_exon1_Kilifi_027           |            |            |            |            | .T.....   |            |            | G.....      |
| PFD0100c_exon1_Kilifi_097           |            |            |            | .T.....    | .T.....   |            |            | G.....      |
| PFD0100c_exon1_Kilifi_187           |            |            |            |            |           | .C....     |            | G.....      |
| PFD0100c_exon1_Kilifi_201           |            |            |            | .T.....    | .T.....   |            |            | G.....      |
| PFD0100c_exon1_Kilifi_310           | .....A     | .TA....T   | .T...C...T | .....GA..  | .T.....   |            |            | G.....      |
| PFD0100c_exon1_Kilifi_302           |            |            |            |            | .T.....   |            |            | G.....      |
| PFD0100c_exon1_Kilifi_324           | .....A     | .TA....T   | .T...C...T | .....GA..  | .T.....   |            |            | G.....      |
| PFD0100c_exon1_Kilifi_333           | .....A     | .TA....T   | .T...C...T | .....GA..  | .T.....   |            |            | G.....      |
| PFD0100c_exon1_Kilifi_311           | .....A     | .TA....T   | .T...C...T | .....GA..  | .T.....   |            |            | G.....      |
| PFD0100c_exon1_Kilifi_297           |            |            |            |            |           | .C....     |            | G.....      |
| PFD0100c_exon1_Kilifi_319           |            |            |            |            |           |            |            | G.....      |
| PFD0100c_exon1_Kilifi_289           |            |            |            |            | .T.....   |            |            | G.....      |
| PFD0100c_exon1_Kilifi_247           | .....A     | .TA....T   | .T...C...T | .....GA..  | .T.....   |            |            | G.....      |
| PFD0100c_exon1_Kilifi_110           |            |            |            |            | .T.....   |            |            | G.....      |
| PFD0100c_exon1_Kilifi_348           | .....A     | .TA....T   | .T...C...T | .....GA..  | .T.....   |            |            | G.....      |
| PFD0100c_exon1_Kilifi_124           | .....A     | .TA....T   | .T...C...T | .....GA..  | .T.....   |            |            | G.....      |
| <i>Plasmodium reichenowi</i> _exon1 | ...T...A   | .A....T    | .T...G...T | GC...GA..  | .T..A.G.. | CG.C.....  | .....GT..  | .....A...   |

|                                     | 2010       | 2020         | 2030       | 2040      | 2050       | 2060        | 2070        | 2080                   |
|-------------------------------------|------------|--------------|------------|-----------|------------|-------------|-------------|------------------------|
| PFD0100c_3D7_exon1                  | AAGCGTTAAT | TCAGCTCTTG   | AATTTAGTGA | ATCTACAAC | AGGCCTGGAA | ATTCATTTTC  | TTTGCCCTCAA | ATGACTTGGG             |
| PFD0100c_exon1_Kilifi_062           | .....      | CAC.A.T.G.   | .C..A..    | .....     | T....CT.   | .....A.A.   | .....       | .A...T..               |
| PFD0100c_exon1_Kilifi_091           | .....      | CAC.A.T.G.   | .C..A..    | .....     | T....CT.   | .....A.A.   | .....       | .A...T..               |
| PFD0100c_exon1_Kilifi_250           | .....      | .....T...    | .C..A..    | .....     | T....CT.   | .....A.A.   | .....AA.... | .A...T..               |
| PFD0100c_exon1_Kilifi_314           | .....      | .....T...    | .C..A..    | .....     | T....CT.   | .....A.A.   | .....       | .A...T..               |
| PFD0100c_exon1_Kilifi_093           | .....      | A CAC.A.T.G. | .C..A..    | .....     | T....CT.   | .....T.A.A. | .....       | .A...T..               |
| PFD0100c_exon1_Kilifi_128           | .....      | A CAC.A.T.G. | .C..A..    | .....     | T....CT.   | .....T.A.A. | .....       | .A...T..               |
| PFD0100c_exon1_Kilifi_186           | .....      | .....        | CAC.A.T.G. | .C..A..   | .....      | T....AC..   | .....       | .A...T..               |
| PFD0100c_exon1_Kilifi_345           | .....      | T.....       | .....T...  | .C..A..   | .....      | T....CT.    | .....A.A.   | .....AA....            |
| PFD0100c_exon1_Kilifi_202           | .....      | CA..A.T.G.   | .C..A..    | .....     | T....CT.   | .....A.A.   | .....       | .A...T..               |
| PFD0100c_exon1_Kilifi_290           | .....      | .....        | C..A.T.G.  | .C..A..   | .....      | T....CT.    | .....A.A.   | .....                  |
| PFD0100c_exon1_Kilifi_304           | .....      | CA..A.T.G.   | .C..A..    | .....     | T.A...CT.  | .....C.C.   | .....A....  | .A...T..               |
| PFD0100c_exon1_Kilifi_299           | .....      | .....T...    | .C..A..    | .....     | TT...CT.   | .....A....  | .....       | .A...T..               |
| PFD0100c_exon1_Kilifi_082           | .....      | CA..A.T.G.   | .C..A..    | .....     | ...G..G..  | T.A..TCC.   | G.A.T.C.C.  | .....                  |
| PFD0100c_exon1_Kilifi_334           | .....      | CA..A.T.G.   | .C..A..    | .....     | ...G..G..  | T.A..TCC.   | G.A.T.C.C.  | .....                  |
| PFD0100c_exon1_Kilifi_298           | .....      | CA..A.T.G.   | .C..A..    | .....     | ...G..G..  | T.A..TCC.   | G.A.T.C.C.  | .....GC...             |
| PFD0100c_exon1_Kilifi_105           | .....      | CA..A.T.G.   | .C..A..    | .....     | ...G..G..  | T.A..TCC.   | G.A.T.C.C.  | .....GC...             |
| PFD0100c_exon1_Kilifi_406           | .....      | CA..A.T.G.   | .C..A..    | .....     | ...G..G..  | T.A..TCC.   | G.A.T.C.C.  | .....GC...             |
| PFD0100c_exon1_Kilifi_510           | .....      | CA..A.T.G.   | .C..A..    | .....     | ...G..G..  | T.A..TCC.   | G.A.T.C.C.  | .....GC...             |
| PFD0100c_exon1_Kilifi_164           | .....      | CA..A.T.G.   | .C..A..    | .....     | ...G..G..  | T.A..TCC.   | G.A.T.C.C.  | .....GC...             |
| PFD0100c_exon1_Kilifi_321           | .....      | CA..A.T.G.   | .C..A..    | .....     | ...G..G..  | T.A..TCC.   | G.A.T.C.C.  | .....GC...             |
| PFD0100c_exon1_Kilifi_050           | .....      | CA..A.T.G.   | .C..A..    | .....     | ...G..G..  | T.A..TCC.   | G.A.T.C.C.  | .....GC...             |
| PFD0100c_exon1_Kilifi_344           | .....      | CA..A.T.G.   | .C..A..    | .....     | ...G..G..  | T.A..TCC.   | G.A.T.C.C.  | .....GC...             |
| PFD0100c_exon1_Kilifi_240           | .....      | CA..A.T.G.   | .C..A..    | .....     | ...G..G..  | .....TCC.   | G....A...   | .....                  |
| PFD0100c_exon1_Kilifi_028           | .....      | CA..A.T.G.   | .C..A..    | .....     | ...G..G..  | .....TCC.   | G...T.C.C.  | .....GC...             |
| PFD0100c_exon1_Kilifi_356           | .....      | CA..A.T.G.   | .C..A..    | .....     | .....T     | .....AC..   | .....A....  | .....                  |
| PFD0100c_exon1_Kilifi_528           | .....      | CA..A.T.G.   | .C..A..    | .....     | .....      | T...AC..    | .....A....  | .....                  |
| PFD0100c_exon1_Kilifi_364           | .....      | A CAC.A.T.G. | .C..A..    | .....     | .....      | T...AC..    | .....A....  | .....                  |
| PFD0100c_exon1_Kilifi_057           | .....      | A CAC.A.T.G. | .C..A..    | .....     | .....      | T...AC..    | .....A....  | .....                  |
| PFD0100c_exon1_Kilifi_194           | .....      | A CAC.A.T.G. | .C..A..    | .....     | .....      | T...AC..    | .....A....  | .....                  |
| PFD0100c_exon1_Kilifi_045           | .....      | A CAC.A.T.G. | .C..A..    | .....     | .....      | T...AC..    | .....A....  | .....                  |
| PFD0100c_exon1_Kilifi_214           | .....      | A CAC.A.T.G. | .C..A..    | .....     | .....      | T...AC..    | .....A....  | .....A.T..TA.          |
| PFD0100c_exon1_Kilifi_020           | .....      | AC....       | .....      | .....     | .....      | A..G....    | A....       | .....A.T..TAT          |
| PFD0100c_exon1_Kilifi_023           | .....      | CA..A.T.G.   | .C..A..    | .....     | .....      | T...AC..    | .....A....  | .....                  |
| PFD0100c_exon1_Kilifi_052           | .....      | A CAC.A.T.G. | .C..A..    | .....     | .....      | T...AC..    | .....A....  | .....A.T..TA.          |
| PFD0100c_exon1_Kilifi_340           | .....      | A CAC.A.T.G. | .C..A..    | .....     | .....      | T...AC..    | .....A....  | .....A.T..TA.          |
| PFD0100c_exon1_Kilifi_027           | .....      | A CAC.A.T.G. | .C..A..    | .....     | .....      | T...AC..    | .....A....  | .....A...T..           |
| PFD0100c_exon1_Kilifi_097           | .....      | A CAC.A.T.G. | .C..A..    | .....     | .....      | T...AC..    | .....A....  | .....A.T..TA.          |
| PFD0100c_exon1_Kilifi_187           | .....      | A CAC.A.T.G. | .C..A..    | .....     | .....      | T...AC..    | .....A....  | .....                  |
| PFD0100c_exon1_Kilifi_201           | .....      | A CAC.A.T.G. | .C..A..    | .....     | .....      | T...AC..    | .....A....  | .....                  |
| PFD0100c_exon1_Kilifi_310           | .....      | CA..A.T.G.   | .C..A..    | .....     | .....      | T...AC..    | .....A....  | .....                  |
| PFD0100c_exon1_Kilifi_302           | .....      | A CAC.A.T.G. | .C..A..    | .....     | .....      | T...AC..    | .....A....  | .....                  |
| PFD0100c_exon1_Kilifi_324           | .....      | CA..A.T.G.   | .C..A..    | .....     | .....      | T...AC..    | .....A....  | .....                  |
| PFD0100c_exon1_Kilifi_333           | .....      | CA..A.T.G.   | .C..A..    | .....     | .....      | T...AC..    | .....A....  | .....                  |
| PFD0100c_exon1_Kilifi_311           | .....      | A CAC.A.T.G. | .C..A..    | .....     | .....      | T...AC..    | .....A....  | .....                  |
| PFD0100c_exon1_Kilifi_297           | .....      | .....        | .....      | .....     | .....      | .....       | .....       | .....                  |
| PFD0100c_exon1_Kilifi_319           | .....      | .....        | .....      | .....     | .....      | .....       | .....       | .....A...T..           |
| PFD0100c_exon1_Kilifi_289           | .....      | .....        | .....      | .....     | .....      | .....       | .....       | .....                  |
| PFD0100c_exon1_Kilifi_247           | .....      | CA..A.T.G.   | .C..A..    | .....     | .....      | AC....      | .....A....  | .....AA....            |
| PFD0100c_exon1_Kilifi_110           | .....      | A.....       | .....      | .....     | .....      | .....       | .....       | .....                  |
| PFD0100c_exon1_Kilifi_348           | .....      | CA..A.T.G.   | .C..A..    | .....     | .....      | AC....      | .....A....  | .....                  |
| PFD0100c_exon1_Kilifi_124           | .....      | .....        | A..G....   | .....     | .....      | C....       | .....       | .....                  |
| <i>Plasmodium reichenowi</i> _exon1 | ...T.C.... | .....T...    | .C..A..    | .....     | T....      | .....C..    | .....T.A.GA | .....AG.G.T T.A....T.T |

|                                     | 2090        | 2100          | 2110         | 2120        | 2130       | 2140       | 2150       | 2160      |
|-------------------------------------|-------------|---------------|--------------|-------------|------------|------------|------------|-----------|
| PFD0100c_3D7_exon1                  | AATTTGAAGC  | TCCTGGTCAA    | GGAACGGTGA   | TGAGAATGTT  | AGGACAGAAA | AATTCTTTCA | AAACACTTGC | ACAAACAAA |
| PFD0100c_exon1_Kilifi_062           | .T.....T.   | .....C....    | .....G....   | .....GT.    |            |            |            |           |
| PFD0100c_exon1_Kilifi_091           | .....A..... | .....C....    | .....G....   | .....GT.    |            |            |            |           |
| PFD0100c_exon1_Kilifi_250           | .T.C...GC.  | A...CT....    | .....G....   | .....GT.    |            |            |            |           |
| PFD0100c_exon1_Kilifi_314           | .....A..... | .....C....    | .....G....   | .....GT.    |            |            |            |           |
| PFD0100c_exon1_Kilifi_093           | .....A..... | .....C....    | .....G....   | .....GT.    |            |            |            |           |
| PFD0100c_exon1_Kilifi_128           | .....A..... | .....C....    | .....G....   | .....GT.    |            |            |            |           |
| PFD0100c_exon1_Kilifi_186           | .....A..... | .....C....    | .....G....   | .....GT.    |            |            |            |           |
| PFD0100c_exon1_Kilifi_345           | .T.C...GC.  | A...CT....    | .....T....   | .....G....  | .....GT.   |            |            |           |
| PFD0100c_exon1_Kilifi_202           | .T.....T.   | A...T....     | .....G....   | .....GT.    |            |            |            |           |
| PFD0100c_exon1_Kilifi_290           | ...C...CA   | .....C....    | .....G....   | .....GT.    |            |            |            |           |
| PFD0100c_exon1_Kilifi_304           | .T.C...GC.  | A...CT....    | .....G....   | .....GT.    |            |            |            |           |
| PFD0100c_exon1_Kilifi_299           | .....A..... | .....C....    | .....G....   | .....GT.    |            |            |            |           |
| PFD0100c_exon1_Kilifi_082           | .TA..A..T.  | A.A...AG..    | AAC.T....    | .....G....  | .....TGG.  |            |            |           |
| PFD0100c_exon1_Kilifi_334           | .TA..A..T.  | A.A...AG..    | AAC.T....    | .....G....  | .....TGG.  |            |            |           |
| PFD0100c_exon1_Kilifi_298           | .T.C...GC.  | A...CT....    | .....T....   | .....G....  | .....GT.   |            |            |           |
| PFD0100c_exon1_Kilifi_105           | .TA..A..T.  | A.A...AG..    | AAC.T....    | .....G....  | .....TGG.  |            |            |           |
| PFD0100c_exon1_Kilifi_406           | .T.C...GC.  | A...CT....    | .....G....   | .....GT.    |            |            |            |           |
| PFD0100c_exon1_Kilifi_510           | .TA.....T.  | A.A...AG..    | AAC.T....    | .....G....  | .....TGG.  |            |            |           |
| PFD0100c_exon1_Kilifi_164           | .TA.....T.  | A.A...AG..    | AAC.T....    | .....G....  | .....TGG.  |            |            |           |
| PFD0100c_exon1_Kilifi_321           | .TA..A..T.  | A.A...AG..    | AAC.T....    | .....G....  | .....TGG.  |            |            |           |
| PFD0100c_exon1_Kilifi_050           | .TA.....T.  | A.A...AG..    | AAC.T....    | .....G....  | .....TGG.  |            |            |           |
| PFD0100c_exon1_Kilifi_344           | .TA..A..T.  | A.A...AG..    | AAC.T....    | .....G....  | .....TGG.  |            |            |           |
| PFD0100c_exon1_Kilifi_240           | .TA.....T.  | A.A...AG..    | AAC.T....    | .....G....  | .....G..   |            |            |           |
| PFD0100c_exon1_Kilifi_028           | .T.....C.   | A...T....     | .....G....   | .....GT.    |            |            |            |           |
| PFD0100c_exon1_Kilifi_356           | .....A..... | .....C....    | .....G....   | .....GT.    |            |            |            |           |
| PFD0100c_exon1_Kilifi_528           | ..A.....A   | .....G....    | .....G.G.G.. | .....GT.    |            |            |            |           |
| PFD0100c_exon1_Kilifi_364           | ..A.....A   | .....G....    | .....G.G.G.. | .....GT.    |            |            |            |           |
| PFD0100c_exon1_Kilifi_057           | ..A.....A   | .....G....    | .....G.G.G.. | .....GT.    |            |            |            |           |
| PFD0100c_exon1_Kilifi_194           | ..A.....A   | .....G....    | .....G.G.G.. | .....GT.    |            |            |            |           |
| PFD0100c_exon1_Kilifi_045           | ..A.....A   | .....G....    | .....G.G.G.. | .....GT.    |            |            |            |           |
| PFD0100c_exon1_Kilifi_214           | .T.....A.   | .....A...A... | .....A.TGG.  |             |            |            |            |           |
| PFD0100c_exon1_Kilifi_020           | .T.....A.   | .....A...A... | .....G....   | .....A.TGG. |            |            |            |           |
| PFD0100c_exon1_Kilifi_023           | .....A..... | .....A...A... | .....A.TGG.  |             |            |            |            |           |
| PFD0100c_exon1_Kilifi_052           | .T.....A.   | .....A...A... | .....A.TGG.  |             |            |            |            |           |
| PFD0100c_exon1_Kilifi_340           | .T.....A.   | .....A...A... | .....A.TGG.  |             |            |            |            |           |
| PFD0100c_exon1_Kilifi_027           | .....A..... | .....C....    | .....G....   | .....GT.    |            |            |            |           |
| PFD0100c_exon1_Kilifi_097           | .T.....A.   | .....A...A... | .....A.TGG.  |             |            |            |            |           |
| PFD0100c_exon1_Kilifi_187           | .....A..... | .....C....    | .....G....   | .....GT.    |            |            |            |           |
| PFD0100c_exon1_Kilifi_201           | .....A..... | .....C....    | .....G....   | .....GT.    |            |            |            |           |
| PFD0100c_exon1_Kilifi_310           | .....A..... | .....C....    | .....G....   | .....GT.    |            |            |            |           |
| PFD0100c_exon1_Kilifi_302           | .....A..... | .....C....    | .....G....   | .....GT.    |            |            |            |           |
| PFD0100c_exon1_Kilifi_324           | .....A..... | .....C....    | .....G....   | .....GT.    |            |            |            |           |
| PFD0100c_exon1_Kilifi_333           | .....A..... | .....C....    | .....G....   | .....GT.    |            |            |            |           |
| PFD0100c_exon1_Kilifi_311           | ..A.....A   | .....G....    | .....G.G.G.. | .....GT.    |            |            |            |           |
| PFD0100c_exon1_Kilifi_297           | .....A..... | .....C....    | .....G....   | .....GT.    |            |            |            |           |
| PFD0100c_exon1_Kilifi_319           | .....A..... | .....C....    | .....G....   | .....GT.    |            |            |            |           |
| PFD0100c_exon1_Kilifi_289           | .....A..... | .....C....    | .....G....   | .....GT.    |            |            |            |           |
| PFD0100c_exon1_Kilifi_247           | .T.C...C.   | A...CT....    | .....G....   | .....GT.    |            |            |            |           |
| PFD0100c_exon1_Kilifi_110           | .....A..... | .....C....    | .....G....   | .....G..    |            |            |            |           |
| PFD0100c_exon1_Kilifi_348           | G...A....   | .....G....    | .....G....   | .....G..    |            |            |            |           |
| PFD0100c_exon1_Kilifi_124           | .TA.....T.  | .....A...A... | .....G....   | .....G..    |            |            |            |           |
| <i>Plasmodium reichenowi</i> _exon1 | .T.....T.   | A...C....     | .A.C.AA..    | .....G....  | .....G..   |            |            |           |

2170 2180 2190 2200 2210 2220 2230 2240  
.....|.....|.....|.....|.....|.....|.....|.....|.....|.....|  
CAGGAAGTTT CTTCACTAG TTCTGAATCA CGTTCAAGTT CCTTCAACAA TAACTCCCAA ATAATTCCCC ATATATTGAA

PFD0100c\_3D7\_exon1  
PFD0100c\_exon1\_Kilifi\_062  
PFD0100c\_exon1\_Kilifi\_091  
PFD0100c\_exon1\_Kilifi\_250  
PFD0100c\_exon1\_Kilifi\_314  
PFD0100c\_exon1\_Kilifi\_093  
PFD0100c\_exon1\_Kilifi\_128  
PFD0100c\_exon1\_Kilifi\_186  
PFD0100c\_exon1\_Kilifi\_345  
PFD0100c\_exon1\_Kilifi\_202  
PFD0100c\_exon1\_Kilifi\_290  
PFD0100c\_exon1\_Kilifi\_304  
PFD0100c\_exon1\_Kilifi\_299  
PFD0100c\_exon1\_Kilifi\_082  
PFD0100c\_exon1\_Kilifi\_334  
PFD0100c\_exon1\_Kilifi\_298  
PFD0100c\_exon1\_Kilifi\_105  
PFD0100c\_exon1\_Kilifi\_406  
PFD0100c\_exon1\_Kilifi\_510  
PFD0100c\_exon1\_Kilifi\_164  
PFD0100c\_exon1\_Kilifi\_321  
PFD0100c\_exon1\_Kilifi\_050  
PFD0100c\_exon1\_Kilifi\_344  
PFD0100c\_exon1\_Kilifi\_240  
PFD0100c\_exon1\_Kilifi\_028  
PFD0100c\_exon1\_Kilifi\_356  
PFD0100c\_exon1\_Kilifi\_528  
PFD0100c\_exon1\_Kilifi\_364  
PFD0100c\_exon1\_Kilifi\_057  
PFD0100c\_exon1\_Kilifi\_194  
PFD0100c\_exon1\_Kilifi\_045  
PFD0100c\_exon1\_Kilifi\_214  
PFD0100c\_exon1\_Kilifi\_020  
PFD0100c\_exon1\_Kilifi\_023  
PFD0100c\_exon1\_Kilifi\_052  
PFD0100c\_exon1\_Kilifi\_340  
PFD0100c\_exon1\_Kilifi\_027  
PFD0100c\_exon1\_Kilifi\_097  
PFD0100c\_exon1\_Kilifi\_187  
PFD0100c\_exon1\_Kilifi\_201  
PFD0100c\_exon1\_Kilifi\_310  
PFD0100c\_exon1\_Kilifi\_302  
PFD0100c\_exon1\_Kilifi\_324  
PFD0100c\_exon1\_Kilifi\_333  
PFD0100c\_exon1\_Kilifi\_311  
PFD0100c\_exon1\_Kilifi\_297  
PFD0100c\_exon1\_Kilifi\_319  
PFD0100c\_exon1\_Kilifi\_289  
PFD0100c\_exon1\_Kilifi\_247  
PFD0100c\_exon1\_Kilifi\_110  
PFD0100c\_exon1\_Kilifi\_348  
PFD0100c\_exon1\_Kilifi\_124  
*Plasmodium reichenowi*\_exon1











|                                     | 170      | 180        | 190        | 200        | 210       | 220        | 230        | 240        |
|-------------------------------------|----------|------------|------------|------------|-----------|------------|------------|------------|
| PFD1160w_3D7_exon1                  | TCATTATT | TATCGATGAT | GTAAAAGATG | TATTTATAAA | TAATGATTG | GTAAAAATCC | CTGTTAAAGT | TCGTAAGAGT |
| PFD1160w_exon1_Kilifi_017           | .....    | ...G....   | .....      | .....      | .....     | .....      | ..T.G...   | .....      |
| PFD1160w_exon1_Kilifi_528           | .....    | ...G....   | .....      | .....      | .....     | .....      | ...G....   | .....      |
| PFD1160w_exon1_Kilifi_019           | .....    | ...G....   | .....      | .....      | .....     | .....      | ..T.G...   | .....      |
| PFD1160w_exon1_Kilifi_020           | .....    | ...G....   | .....      | ...A....   | .....     | .....      | ...G....   | .....      |
| PFD1160w_exon1_Kilifi_023           | .....    | ...G....   | .....      | .....      | .....     | .....      | ...G....   | .....      |
| PFD1160w_exon1_Kilifi_027           | .....    | ...G....   | .....      | .....      | .....     | .....      | ...G....   | .....      |
| PFD1160w_exon1_Kilifi_028           | .....    | ...G....   | .....      | .....      | .....     | .....      | ...G....   | .....      |
| PFD1160w_exon1_Kilifi_039           | .....    | ...G....   | .....      | .....      | .....     | .....      | ...G....   | .....      |
| PFD1160w_exon1_Kilifi_044           | .....    | ...G....   | .....      | ...A....   | .....     | .....      | ...G..T.   | .....      |
| PFD1160w_exon1_Kilifi_045           | .....    | ...G....   | .....      | ...A....   | .....     | .....      | ...G....   | .....      |
| PFD1160w_exon1_Kilifi_050           | .....    | ...G....   | .....      | .....      | .....     | .....      | ...G....   | .....      |
| PFD1160w_exon1_Kilifi_051           | .....    | ...G....   | .....      | .....      | .....     | .....      | ...G....   | .....      |
| PFD1160w_exon1_Kilifi_052           | .....    | ...G....   | .....      | .....      | .....     | .....      | ...G....   | .....      |
| PFD1160w_exon1_Kilifi_057           | .....    | ...G....   | .....      | .....      | .....     | .....      | ...G....   | .....      |
| PFD1160w_exon1_Kilifi_062           | .....    | ...G....   | .....      | .....      | .....     | .....      | ...G....   | .....      |
| PFD1160w_exon1_Kilifi_082           | .....    | ...G....   | .....      | ...A....   | .....     | .....      | ...G....   | .....      |
| PFD1160w_exon1_Kilifi_084           | .....    | ...G....   | .....      | .....      | .....     | .....      | ...G....   | .....      |
| PFD1160w_exon1_Kilifi_093           | .....    | ...G....   | .....      | ...A....   | .....     | .....      | ...G..T.   | .....      |
| PFD1160w_exon1_Kilifi_097           | .....    | ...G....   | .....      | .....      | .....     | .....      | ...G....   | .....      |
| PFD1160w_exon1_Kilifi_105           | .....    | ...G....   | .....      | .....      | .....     | .....      | ...G....   | .....      |
| PFD1160w_exon1_Kilifi_110           | .....    | ...G....   | .....      | .....      | .....     | .....      | ...G....   | .....      |
| PFD1160w_exon1_Kilifi_124           | .....    | ...G....   | .....      | .....      | .....     | .....      | ...G....   | .....      |
| PFD1160w_exon1_Kilifi_150           | .....    | ...G....   | .....      | .....      | .....     | .....      | ...G....   | .....      |
| PFD1160w_exon1_Kilifi_153           | .....    | ...G....   | .....      | .....      | .....     | .....      | ...G....   | .....      |
| PFD1160w_exon1_Kilifi_160           | .....    | ...G....   | .....      | .....      | .....     | .....      | ...G....   | .....      |
| PFD1160w_exon1_Kilifi_162           | .....    | ...G....   | .....      | ...A....   | .....     | .....      | ...G....   | .....      |
| PFD1160w_exon1_Kilifi_164           | .....    | ...G....   | .....      | .....      | .....     | .....      | ..T.G...   | .....      |
| PFD1160w_exon1_Kilifi_186           | .....    | ...G....   | .....      | .....      | .....     | .....      | ...G....   | .....      |
| PFD1160w_exon1_Kilifi_187           | .....    | ...G....   | .....      | .....      | .....     | ...G....   | ...G....   | .....      |
| PFD1160w_exon1_Kilifi_191           | .....    | ...G....   | .....      | .....      | .....     | .....      | ...G....   | .....      |
| PFD1160w_exon1_Kilifi_194           | .....    | ...G....   | .....      | .....      | .....     | .....      | ...G....   | .....      |
| PFD1160w_exon1_Kilifi_199           | .....    | ...G....   | .....      | .....      | .....     | .....      | ...G....   | .....      |
| PFD1160w_exon1_Kilifi_201           | .....    | ...G....   | .....      | .....      | .....     | .....      | ..T.G...   | .....      |
| PFD1160w_exon1_Kilifi_202           | .....    | ...G....   | .....      | .....      | .....     | .....      | ...G....   | .....      |
| PFD1160w_exon1_Kilifi_214           | .....    | ...G....   | .....      | .....      | ...G....  | .....      | ...G....   | .....      |
| PFD1160w_exon1_Kilifi_216           | .....    | ...G....   | .....      | ...A....   | .....     | .....      | ...G....   | ...T....   |
| PFD1160w_exon1_Kilifi_229           | .....    | ...G....   | .....      | .....      | .....     | .....      | ...G....   | .....      |
| PFD1160w_exon1_Kilifi_240           | .....    | ...G....   | .....      | .....      | .....     | .....      | ...G....   | .....      |
| PFD1160w_exon1_Kilifi_247           | .....    | ...G....   | .....      | .....      | .....     | .....      | ...G....   | .....      |
| PFD1160w_exon1_Kilifi_258           | .....    | ...G....   | .....      | .....      | .....     | .....      | ..T.G...   | .....      |
| PFD1160w_exon1_Kilifi_262           | .....    | ...G....   | .....      | .....      | .....     | .....      | ...G....   | .....      |
| PFD1160w_exon1_Kilifi_297           | .....    | ...G....   | .....      | .....      | .....     | .....      | ...T....   | .....      |
| PFD1160w_exon1_Kilifi_298           | .....    | ...G....   | .....      | .....      | .....     | .....      | ...G....   | .....      |
| PFD1160w_exon1_Kilifi_299           | .....    | ...G....   | .....      | ...A....   | .....     | .....      | ...G..T.   | .....      |
| PFD1160w_exon1_Kilifi_301           | .....    | ...G....   | .....      | .....      | .....     | .....      | ...G....   | .....      |
| PFD1160w_exon1_Kilifi_302           | .....    | ...G....   | .....      | .....      | .....     | .....      | ...G....   | .....      |
| PFD1160w_exon1_Kilifi_307           | .....    | ...G....   | .....      | .....      | .....     | .....      | ...G....   | .....      |
| PFD1160w_exon1_Kilifi_311           | .....    | ...G....   | .....      | .....      | .....     | .....      | ...G....   | .....      |
| PFD1160w_exon1_Kilifi_314           | .....    | ...G....   | .....      | .....      | .....     | .....      | ...G..T.   | .....      |
| PFD1160w_exon1_Kilifi_319           | .....    | ...G....   | .....      | .....      | ...G....  | .....      | ...G....   | .....      |
| PFD1160w_exon1_Kilifi_321           | .....    | ...G....   | .....      | ...A....   | .....     | .....      | ...G..T.   | .....      |
| PFD1160w_exon1_Kilifi_322           | .....    | ...G....   | .....      | .....      | .....     | .....      | ...G....   | .....      |
| PFD1160w_exon1_Kilifi_324           | .....    | ...G....   | .....      | ...A....   | .....     | .....      | ...G..T.   | .....      |
| PFD1160w_exon1_Kilifi_331           | .....    | ...G....   | .....      | .....      | .....     | .....      | ...G....   | .....      |
| PFD1160w_exon1_Kilifi_336           | .....    | ...G....   | .....      | ...A....   | .....     | .....      | ...G..T.   | .....      |
| PFD1160w_exon1_Kilifi_340           | .....    | ...G....   | .....      | .....      | .....     | .....      | ..T.G...   | .....      |
| PFD1160w_exon1_Kilifi_343           | .....    | ...G....   | .....      | .....      | .....     | .....      | ...G....   | .....      |
| PFD1160w_exon1_Kilifi_344           | .....    | ...G....   | .....      | .....      | .....     | .....      | ...G....   | .....      |
| PFD1160w_exon1_Kilifi_345           | .....    | ...G....   | .....      | .....      | .....     | .....      | ...G....   | .....      |
| PFD1160w_exon1_Kilifi_348           | .....    | ...G....   | .....      | ...A....   | .....     | .....      | ...G....   | .....      |
| PFD1160w_exon1_Kilifi_349           | .....    | ...G....   | .....      | .....      | .....     | ...G....   | ...G....   | .....      |
| PFD1160w_exon1_Kilifi_356           | .....    | ...G....   | .....      | .....      | .....     | ...G....   | ...G....   | .....      |
| PFD1160w_exon1_Kilifi_364           | .....    | ...G....   | .....      | .....      | .....     | .....      | ...G....   | .....      |
| PFD1160w_exon1_Kilifi_365           | .....    | ...G....   | .....      | .....      | .....     | .....      | ...G....   | .....      |
| PFD1160w_exon1_Kilifi_366           | .....    | ...G....   | .....      | .....      | .....     | .....      | ...G....   | .....      |
| PFD1160w_exon1_Kilifi_384           | .....    | ...G....   | .....      | .....      | .....     | .....      | ...G....   | .....      |
| PFD1160w_exon1_Kilifi_389           | .....    | ...G....   | .....      | .....      | .....     | .....      | ...G....   | .....      |
| PFD1160w_exon1_Kilifi_406           | .....    | ...G....   | .....      | .....      | .....     | .....      | ...G....   | .....      |
| PFD1160w_exon1_Kilifi_510           | .....    | ...G....   | .....      | .....      | .....     | .....      | ...G....   | .....      |
| <i>Plasmodium reichenowi</i> _exon1 | .....    | ..T.G...   | ...G....   | ...C....   | .....     | ...GG...   | ..A.AG..   | ...GA.T.   |



|                                     | 330        | 340        | 350        | 360        | 370        | 380        | 390        | 400        |
|-------------------------------------|------------|------------|------------|------------|------------|------------|------------|------------|
| PFD1160w_3D7_exon1                  | TAATTATAAT | AAAGAATATA | GAGATATGAC | TCGAACGTTA | GAAGATTTTT | GTGAAGAAAA | AACACGCAAG | CTAGAAATTA |
| PFD1160w_exon1_Kilifi_017           |            |            |            | A          |            | T          | T          |            |
| PFD1160w_exon1_Kilifi_528           |            |            |            | A          |            |            | T          |            |
| PFD1160w_exon1_Kilifi_019           |            |            |            |            |            | T          | T          |            |
| PFD1160w_exon1_Kilifi_020           |            |            |            |            |            |            | T          |            |
| PFD1160w_exon1_Kilifi_023           |            |            |            | A          | C          |            | T          | G          |
| PFD1160w_exon1_Kilifi_027           | A          |            |            |            |            |            |            |            |
| PFD1160w_exon1_Kilifi_028           |            |            |            |            |            |            | T          |            |
| PFD1160w_exon1_Kilifi_039           |            |            |            |            |            |            |            |            |
| PFD1160w_exon1_Kilifi_044           | A          |            |            | A          | C          |            | T          | G          |
| PFD1160w_exon1_Kilifi_045           |            |            |            |            |            |            | T          |            |
| PFD1160w_exon1_Kilifi_050           |            |            |            |            |            |            |            |            |
| PFD1160w_exon1_Kilifi_051           |            |            |            | A          | C          |            | T          | G          |
| PFD1160w_exon1_Kilifi_052           |            |            |            |            |            |            |            |            |
| PFD1160w_exon1_Kilifi_057           |            |            |            | A          | C          |            | T          | G          |
| PFD1160w_exon1_Kilifi_062           |            |            |            |            |            |            | T          |            |
| PFD1160w_exon1_Kilifi_082           |            |            |            |            |            |            |            |            |
| PFD1160w_exon1_Kilifi_084           | A          |            |            |            |            |            |            |            |
| PFD1160w_exon1_Kilifi_093           | A          |            |            | A          | C          |            | T          | G          |
| PFD1160w_exon1_Kilifi_097           |            |            |            |            |            |            |            |            |
| PFD1160w_exon1_Kilifi_105           |            |            |            | A          | C          |            | T          | G          |
| PFD1160w_exon1_Kilifi_110           |            |            |            |            |            |            |            |            |
| PFD1160w_exon1_Kilifi_124           |            |            |            | A          |            |            | T          |            |
| PFD1160w_exon1_Kilifi_150           |            |            |            | A          | C          |            | T          | G          |
| PFD1160w_exon1_Kilifi_153           |            |            |            | A          | C          |            | T          | T          |
| PFD1160w_exon1_Kilifi_160           |            |            |            | A          | C          |            | T          | G          |
| PFD1160w_exon1_Kilifi_162           |            |            |            |            |            |            | T          |            |
| PFD1160w_exon1_Kilifi_164           |            |            |            |            |            | T          | T          |            |
| PFD1160w_exon1_Kilifi_186           |            |            |            |            |            |            |            |            |
| PFD1160w_exon1_Kilifi_187           |            |            |            | A          |            | T          | T          |            |
| PFD1160w_exon1_Kilifi_191           |            |            |            | A          | C          |            | T          | G          |
| PFD1160w_exon1_Kilifi_194           |            |            |            |            |            |            | T          |            |
| PFD1160w_exon1_Kilifi_199           |            |            |            |            |            |            |            |            |
| PFD1160w_exon1_Kilifi_201           |            |            |            |            |            | T          | T          |            |
| PFD1160w_exon1_Kilifi_202           |            |            |            |            |            |            |            |            |
| PFD1160w_exon1_Kilifi_214           |            |            |            |            |            |            | T          |            |
| PFD1160w_exon1_Kilifi_216           | A          |            |            |            |            |            |            |            |
| PFD1160w_exon1_Kilifi_229           |            |            |            |            |            |            | T          |            |
| PFD1160w_exon1_Kilifi_240           |            |            |            | A          | C          |            | T          | G          |
| PFD1160w_exon1_Kilifi_247           |            |            |            |            |            |            | T          |            |
| PFD1160w_exon1_Kilifi_258           |            |            |            | A          | C          |            | T          | G          |
| PFD1160w_exon1_Kilifi_262           |            |            |            | A          | C          |            | T          | G          |
| PFD1160w_exon1_Kilifi_297           |            |            |            |            |            |            |            |            |
| PFD1160w_exon1_Kilifi_298           | A          |            |            | A          | C          |            | T          |            |
| PFD1160w_exon1_Kilifi_299           | A          |            |            |            |            |            |            |            |
| PFD1160w_exon1_Kilifi_301           | A          |            |            | A          |            |            | T          |            |
| PFD1160w_exon1_Kilifi_302           |            |            |            |            |            |            |            |            |
| PFD1160w_exon1_Kilifi_307           |            |            |            | A          | C          |            | T          | G          |
| PFD1160w_exon1_Kilifi_311           |            |            |            | A          | C          |            | T          | G          |
| PFD1160w_exon1_Kilifi_314           |            |            |            | A          |            | T          | T          |            |
| PFD1160w_exon1_Kilifi_319           |            |            |            | A          |            | T          | T          |            |
| PFD1160w_exon1_Kilifi_321           | A          |            |            |            |            |            |            |            |
| PFD1160w_exon1_Kilifi_322           |            |            |            |            |            |            | T          |            |
| PFD1160w_exon1_Kilifi_324           |            |            |            | A          | C          |            | T          | G          |
| PFD1160w_exon1_Kilifi_331           |            |            |            |            |            |            | T          |            |
| PFD1160w_exon1_Kilifi_336           |            |            |            |            |            |            | T          |            |
| PFD1160w_exon1_Kilifi_340           |            |            |            | A          |            | T          | T          |            |
| PFD1160w_exon1_Kilifi_343           |            |            |            |            |            |            | T          |            |
| PFD1160w_exon1_Kilifi_344           |            |            |            | A          | C          |            | T          | G          |
| PFD1160w_exon1_Kilifi_345           |            |            |            |            |            |            | T          |            |
| PFD1160w_exon1_Kilifi_348           |            |            |            |            |            |            |            |            |
| PFD1160w_exon1_Kilifi_349           |            |            |            |            |            |            | T          |            |
| PFD1160w_exon1_Kilifi_356           |            |            |            |            |            |            | T          |            |
| PFD1160w_exon1_Kilifi_364           |            |            |            |            |            |            | TT         |            |
| PFD1160w_exon1_Kilifi_365           |            |            |            |            |            |            |            |            |
| PFD1160w_exon1_Kilifi_366           |            |            |            |            |            |            | T          |            |
| PFD1160w_exon1_Kilifi_384           |            |            |            | A          | C          |            | T          | G          |
| PFD1160w_exon1_Kilifi_389           |            |            |            | A          |            |            | T          |            |
| PFD1160w_exon1_Kilifi_406           | A          |            |            |            |            |            |            |            |
| PFD1160w_exon1_Kilifi_510           |            |            |            | A          | C          |            | T          | T          |
| <i>Plasmodium reichenowi</i> _exon1 | G          |            | C          | A          | G          |            | T          | A          |

|                                     | 410        | 420        | 430        | 440         | 450         | 460        | 470        | 480          |
|-------------------------------------|------------|------------|------------|-------------|-------------|------------|------------|--------------|
| PFD1160w_3D7_exon1                  | .... ....  | .... ....  | .... ....  | .... ....   | .... ....   | .... ....  | .... ....  | .... ....    |
| PFD1160w_exon1_Kilifi_017           | TATATCAAAA | GGATTACGAC | GAAAGTTTAT | ATGTGAATTT  | TAATGAATGG  | ATAAATAAAA | AAAAAGAAGA | CATTTTAAAG   |
| PFD1160w_exon1_Kilifi_528           | ..G.....   | .....      | .....      | .....A..... | .....       | .....      | .....      | .....        |
| PFD1160w_exon1_Kilifi_019           | ..G.....   | .....      | .....      | .....A..... | .....       | .....      | .....      | .....        |
| PFD1160w_exon1_Kilifi_020           | ..G.....   | T.....     | .....      | .....       | .....A..... | .....      | .....      | .....        |
| PFD1160w_exon1_Kilifi_023           | ..G.....   | .....      | .....      | .....A..... | .....       | .....      | .....      | .....        |
| PFD1160w_exon1_Kilifi_027           | .....      | .....      | .....      | .....       | .....A..... | .....      | .....      | .....        |
| PFD1160w_exon1_Kilifi_028           | ..G.....   | .....      | .....      | .....       | .....A..... | .....      | .....      | .....        |
| PFD1160w_exon1_Kilifi_039           | ..G.....   | .....      | .....      | .....       | .....A..... | .....      | .....      | .....        |
| PFD1160w_exon1_Kilifi_044           | ..G.....   | .....      | .....      | .....A..... | .....       | .....      | .....      | .....        |
| PFD1160w_exon1_Kilifi_045           | ..G.....   | .....      | .....      | .....       | .....       | .....      | .....      | .....        |
| PFD1160w_exon1_Kilifi_050           | .....      | .....      | .....      | .....       | .....       | .....      | .....      | .....        |
| PFD1160w_exon1_Kilifi_051           | ..G.....   | .....      | .....      | .....       | .....A..... | .....      | .....      | .....        |
| PFD1160w_exon1_Kilifi_052           | ..G.....   | .....      | .....      | .....       | .....A..... | .....      | .....      | .....        |
| PFD1160w_exon1_Kilifi_057           | ..G.....   | T.....     | .....      | .....       | .....A..... | .....      | .....      | .....        |
| PFD1160w_exon1_Kilifi_062           | ..G.....   | .....      | .....      | .....       | .....A..... | .....      | .....      | .....        |
| PFD1160w_exon1_Kilifi_082           | ..G.....   | .....      | .....      | .....       | .....A..... | .....      | .....      | .....        |
| PFD1160w_exon1_Kilifi_084           | ..G.....   | .....      | .....      | .....       | .....A..... | .....      | .....      | .....        |
| PFD1160w_exon1_Kilifi_093           | ..G.....   | G.....     | .....      | .....       | .....A..... | .....      | .....      | .....        |
| PFD1160w_exon1_Kilifi_097           | .....      | .....      | .....      | .....       | .....A..... | .....      | .....      | .....        |
| PFD1160w_exon1_Kilifi_105           | ..G.....   | T.....     | .....      | .....       | .....A..... | .....      | .....      | .....        |
| PFD1160w_exon1_Kilifi_110           | .....      | .....      | .....      | .....       | .....A..... | .....      | .....      | .....        |
| PFD1160w_exon1_Kilifi_124           | ..G.....   | .....      | .....      | .....       | .....A..... | .....      | .....      | .....        |
| PFD1160w_exon1_Kilifi_150           | ..G.....   | .....      | .....      | .....       | .....A..... | .....      | .....      | .....        |
| PFD1160w_exon1_Kilifi_153           | ..G.....   | .....      | .....      | .....       | .....A..... | .....      | .....      | .....        |
| PFD1160w_exon1_Kilifi_160           | ..G.....   | .....      | .....      | .....       | .....A..... | .....      | .....      | .....        |
| PFD1160w_exon1_Kilifi_162           | ..G.....   | .....      | .....      | .....       | .....A..... | .....      | .....      | .....        |
| PFD1160w_exon1_Kilifi_164           | ..G.....   | .....      | .....      | .....       | .....A..... | .....      | .....      | .....        |
| PFD1160w_exon1_Kilifi_186           | ..G.....   | .....      | .....      | .....       | .....A..... | .....      | .....      | .....        |
| PFD1160w_exon1_Kilifi_187           | ..G.....   | .....      | .....      | .....       | .....A..... | .....      | .....      | .....        |
| PFD1160w_exon1_Kilifi_191           | ..G.....   | .....      | .....      | .....       | .....G..... | .....      | .....      | .....        |
| PFD1160w_exon1_Kilifi_194           | ..G.....   | T.....     | .....      | .....       | .....A..... | .....      | .....      | .....        |
| PFD1160w_exon1_Kilifi_199           | ..G.....   | .....      | .....      | .....       | .....A..... | .....      | .....      | .....        |
| PFD1160w_exon1_Kilifi_201           | ..G.....   | .....      | .....      | .....       | .....A..... | .....      | .....      | .....        |
| PFD1160w_exon1_Kilifi_202           | ..G.....   | .....      | .....      | .....       | .....A..... | .....      | .....      | .....        |
| PFD1160w_exon1_Kilifi_214           | ..G.....   | T.....     | .....      | .....       | .....A..... | .....      | .....      | .....        |
| PFD1160w_exon1_Kilifi_216           | ..G.....   | .....      | .....      | .....       | .....A..... | .....      | .....      | .....        |
| PFD1160w_exon1_Kilifi_229           | .....      | .....      | .....      | .....       | .....A..... | .....      | .....      | .....        |
| PFD1160w_exon1_Kilifi_240           | ..G.....   | .....      | .....      | .....       | .....A..... | .....      | .....      | .....        |
| PFD1160w_exon1_Kilifi_247           | ..G.....   | T.....     | .....      | .....       | .....A..... | .....      | .....      | .....        |
| PFD1160w_exon1_Kilifi_258           | ..G.....   | .....      | .....      | .....       | .....A..... | .....      | .....      | .....        |
| PFD1160w_exon1_Kilifi_262           | ..G.....   | .....      | .....      | .....       | .....A..... | .....      | .....      | .....        |
| PFD1160w_exon1_Kilifi_297           | ..G.....   | .....      | .....      | .....       | .....A..... | .....      | .....      | .....        |
| PFD1160w_exon1_Kilifi_298           | ..G.....   | .....      | .....      | .....       | .....A..... | .....      | .....      | .....        |
| PFD1160w_exon1_Kilifi_299           | .....      | .....      | .....      | .....       | .....A..... | .....      | .....      | .....        |
| PFD1160w_exon1_Kilifi_301           | ..G.....   | .....      | .....      | .....       | .....A..... | .....      | .....      | .....        |
| PFD1160w_exon1_Kilifi_302           | ..G.....   | .....      | .....      | .....       | .....A..... | .....      | .....      | .....        |
| PFD1160w_exon1_Kilifi_307           | ..G.....   | .....      | .....      | .....       | .....A..... | .....      | .....      | .....        |
| PFD1160w_exon1_Kilifi_311           | ..G.....   | .....      | .....      | .....       | .....G..... | .....      | .....      | .....        |
| PFD1160w_exon1_Kilifi_314           | ..G.....   | .....      | .....      | .....       | .....A..... | .....      | .....      | .....        |
| PFD1160w_exon1_Kilifi_319           | ..G.....   | .....      | .....      | .....       | .....A..... | .....      | .....      | .....        |
| PFD1160w_exon1_Kilifi_321           | .....      | .....      | .....      | .....       | .....       | .....      | .....      | .....        |
| PFD1160w_exon1_Kilifi_322           | ..G.....   | .....      | .....      | .....       | .....A..... | .....      | .....      | .....        |
| PFD1160w_exon1_Kilifi_324           | ..G.....   | .....      | .....      | .....       | .....A..... | .....      | .....      | .....        |
| PFD1160w_exon1_Kilifi_331           | ..G.....   | .....      | .....      | .....       | .....A..... | .....      | .....      | .....        |
| PFD1160w_exon1_Kilifi_336           | ..G.....   | T.....     | .....      | .....       | .....A..... | .....      | .....      | .....        |
| PFD1160w_exon1_Kilifi_340           | ..G.....   | .....      | .....      | .....       | .....A..... | .....      | .....      | .....        |
| PFD1160w_exon1_Kilifi_343           | ..G.....   | T.....     | .....      | .....       | .....       | .....      | .....      | .....        |
| PFD1160w_exon1_Kilifi_344           | ..G.....   | .....      | .....      | .....       | .....A..... | .....      | .....      | .....        |
| PFD1160w_exon1_Kilifi_345           | ..G.....   | T.....     | .....      | .....       | .....A..... | .....      | .....      | .....        |
| PFD1160w_exon1_Kilifi_348           | ..G.....   | .....      | .....      | .....       | .....A..... | .....      | .....      | .....        |
| PFD1160w_exon1_Kilifi_349           | ..G.....   | .....      | .....      | .....       | .....A..... | .....      | .....      | .....        |
| PFD1160w_exon1_Kilifi_356           | ..G.....   | T.....     | .....      | .....       | .....A..... | .....      | .....      | .....        |
| PFD1160w_exon1_Kilifi_364           | ..G.....   | .....      | .....      | .....       | .....A..... | .....      | .....      | .....        |
| PFD1160w_exon1_Kilifi_365           | ..G.....   | .....      | .....      | .....       | .....A..... | .....      | .....      | .....        |
| PFD1160w_exon1_Kilifi_366           | ..G.....   | .....      | .....      | .....       | .....A..... | .....      | .....      | .....        |
| PFD1160w_exon1_Kilifi_384           | ..G.....   | .....      | .....      | .....       | .....G..... | .....      | .....      | .....        |
| PFD1160w_exon1_Kilifi_389           | ..G.....   | .....      | .....      | .....       | .....A..... | .....      | .....      | .....        |
| PFD1160w_exon1_Kilifi_406           | ..G.....   | G.....     | .....      | .....       | .....A..... | .....      | .....      | .....        |
| PFD1160w_exon1_Kilifi_510           | ..G.....   | G.....     | .....      | .....       | .....A..... | .....      | .....      | .....        |
| <i>Plasmodium reichenowi</i> _exon1 | ..G..A..TC | A.....A..  | .....      | .....       | .....A..... | .....      | .....      | .....AG..... |

|                                     | 490        | 500        | 510        | 520        | 530        | 540        | 550        | 560        |
|-------------------------------------|------------|------------|------------|------------|------------|------------|------------|------------|
| PFD1160w_3D7_exon1                  | GAATATGAAA | AATTAAGTAA | TAAAGATAAA | TATAAACACT | TATTAAAAAT | TAGTGAAACC | TGTGATCTTA | ATCATGTGGA |
| PFD1160w_exon1_Kilifi_017           |            |            | .G.        |            | .G.        |            |            |            |
| PFD1160w_exon1_Kilifi_528           |            |            |            |            |            |            |            |            |
| PFD1160w_exon1_Kilifi_019           |            |            | .G.        |            | .G.        |            |            |            |
| PFD1160w_exon1_Kilifi_020           | .A.        |            | .G.        |            |            |            |            |            |
| PFD1160w_exon1_Kilifi_023           |            |            | .A.G.      |            |            |            |            |            |
| PFD1160w_exon1_Kilifi_027           |            |            | .A.G.      |            |            | A          |            |            |
| PFD1160w_exon1_Kilifi_028           |            |            | .G.        |            | .G.        |            |            |            |
| PFD1160w_exon1_Kilifi_039           | .A.        |            | .G.        |            |            |            |            |            |
| PFD1160w_exon1_Kilifi_044           |            |            | .G.        |            | .G.        | A          |            |            |
| PFD1160w_exon1_Kilifi_045           |            |            | .G.        |            |            |            |            |            |
| PFD1160w_exon1_Kilifi_050           |            |            |            |            |            |            |            |            |
| PFD1160w_exon1_Kilifi_051           |            |            | .G.        |            |            |            | A.         |            |
| PFD1160w_exon1_Kilifi_052           | .A.        |            | .G.        |            |            |            |            |            |
| PFD1160w_exon1_Kilifi_057           |            |            |            |            |            |            |            |            |
| PFD1160w_exon1_Kilifi_062           |            |            | .G.        |            |            |            |            |            |
| PFD1160w_exon1_Kilifi_082           |            |            |            |            |            | A.         |            |            |
| PFD1160w_exon1_Kilifi_084           |            |            | .G.        |            |            |            |            |            |
| PFD1160w_exon1_Kilifi_093           |            |            | .G.        |            |            |            |            |            |
| PFD1160w_exon1_Kilifi_097           |            |            | .G.        |            | .G.        | A          |            |            |
| PFD1160w_exon1_Kilifi_105           |            |            |            |            |            |            |            |            |
| PFD1160w_exon1_Kilifi_110           |            |            | .G.        |            | .G.        | A          |            |            |
| PFD1160w_exon1_Kilifi_124           |            |            | .G.        |            | .G.        | G.         |            |            |
| PFD1160w_exon1_Kilifi_150           |            |            | .G.        |            | .G.        |            | G.         |            |
| PFD1160w_exon1_Kilifi_153           |            |            | .G.        |            |            |            |            |            |
| PFD1160w_exon1_Kilifi_160           |            |            |            |            |            |            |            |            |
| PFD1160w_exon1_Kilifi_162           |            |            | .G.        |            | .G.        | A          |            |            |
| PFD1160w_exon1_Kilifi_164           |            |            | .G.        |            | .G.        |            |            |            |
| PFD1160w_exon1_Kilifi_186           |            |            |            |            |            |            |            |            |
| PFD1160w_exon1_Kilifi_187           |            |            | .G.        |            |            |            |            |            |
| PFD1160w_exon1_Kilifi_191           |            |            |            |            |            |            |            |            |
| PFD1160w_exon1_Kilifi_194           |            |            |            |            |            |            |            | A.         |
| PFD1160w_exon1_Kilifi_199           | .A.        |            | .G.        |            |            |            |            | A.         |
| PFD1160w_exon1_Kilifi_201           |            |            | .G.        |            | .G.        |            |            |            |
| PFD1160w_exon1_Kilifi_202           |            |            | .G.        |            |            |            |            |            |
| PFD1160w_exon1_Kilifi_214           |            |            |            |            |            |            |            |            |
| PFD1160w_exon1_Kilifi_216           | .A.        |            | .G.        |            |            |            |            |            |
| PFD1160w_exon1_Kilifi_229           |            |            | .G.        |            |            |            |            |            |
| PFD1160w_exon1_Kilifi_240           |            |            |            |            |            |            |            |            |
| PFD1160w_exon1_Kilifi_247           |            |            | .G.        |            | .G.        |            |            |            |
| PFD1160w_exon1_Kilifi_258           |            |            |            |            |            |            |            |            |
| PFD1160w_exon1_Kilifi_262           |            |            | .A.G.      |            |            |            |            |            |
| PFD1160w_exon1_Kilifi_297           | .A.        |            | .G.        |            | .G.        |            |            |            |
| PFD1160w_exon1_Kilifi_298           | .A.        |            | .G.        |            |            |            |            |            |
| PFD1160w_exon1_Kilifi_299           |            |            | .A.G.      |            |            |            |            |            |
| PFD1160w_exon1_Kilifi_301           |            |            | .G.        |            |            |            |            |            |
| PFD1160w_exon1_Kilifi_302           | .A.        |            | .G.        |            |            |            |            |            |
| PFD1160w_exon1_Kilifi_307           |            |            |            |            |            |            |            |            |
| PFD1160w_exon1_Kilifi_311           |            |            | .A.G.      |            |            |            |            |            |
| PFD1160w_exon1_Kilifi_314           |            |            |            |            |            |            |            |            |
| PFD1160w_exon1_Kilifi_319           |            |            | .G.        |            | .G.        |            |            |            |
| PFD1160w_exon1_Kilifi_321           |            |            | .A.G.      |            |            |            |            |            |
| PFD1160w_exon1_Kilifi_322           |            |            | .G.        |            |            |            |            |            |
| PFD1160w_exon1_Kilifi_324           |            |            |            |            |            |            | A.         |            |
| PFD1160w_exon1_Kilifi_331           |            |            | .G.        |            |            |            |            |            |
| PFD1160w_exon1_Kilifi_336           |            |            |            |            |            |            |            |            |
| PFD1160w_exon1_Kilifi_340           |            |            |            |            |            |            |            |            |
| PFD1160w_exon1_Kilifi_343           |            |            |            |            |            |            |            |            |
| PFD1160w_exon1_Kilifi_344           |            |            |            |            |            |            |            |            |
| PFD1160w_exon1_Kilifi_345           |            |            | .A.G.      |            |            |            |            |            |
| PFD1160w_exon1_Kilifi_348           |            |            |            |            |            | A.         |            |            |
| PFD1160w_exon1_Kilifi_349           |            |            |            |            |            |            |            |            |
| PFD1160w_exon1_Kilifi_356           |            |            |            |            |            |            |            |            |
| PFD1160w_exon1_Kilifi_364           |            |            | .G.        |            | .G.        | A          |            |            |
| PFD1160w_exon1_Kilifi_365           |            |            | .G.        |            |            |            |            |            |
| PFD1160w_exon1_Kilifi_366           |            |            | .G.        |            |            |            |            |            |
| PFD1160w_exon1_Kilifi_384           |            |            | .A.G.      |            |            |            |            |            |
| PFD1160w_exon1_Kilifi_389           |            |            | .G.        |            |            |            |            |            |
| PFD1160w_exon1_Kilifi_406           |            |            | .G.        |            |            |            |            |            |
| PFD1160w_exon1_Kilifi_510           |            |            | .G.        |            |            |            |            |            |
| <i>Plasmodium reichenowi</i> _exon1 |            |            | .G.        | A.         | .G.        |            | A.         | C.         |

|                                     | 570       | 580        | 590        | 600        | 610        | 620        | 630        | 640        |
|-------------------------------------|-----------|------------|------------|------------|------------|------------|------------|------------|
| PFD1160w_3D7_exon1                  | TAATTATTC | CTTAATATAT | CAAGTGAGGA | TATGAAAAAA | ATGAAGGAAG | ATGTTAAAAA | ACAACATCTT | GAAGTTAAAG |
| PFD1160w_exon1_Kilifi_017           | .C.       |            |            |            |            |            |            |            |
| PFD1160w_exon1_Kilifi_528           |           |            |            |            |            |            |            |            |
| PFD1160w_exon1_Kilifi_019           | .C.       |            |            |            |            |            |            |            |
| PFD1160w_exon1_Kilifi_020           |           |            | .A.        |            |            | .C.        | .A.        | .G.        |
| PFD1160w_exon1_Kilifi_023           |           |            |            |            |            | .C.        | .A.        | .G.        |
| PFD1160w_exon1_Kilifi_027           |           |            |            | .AT.       |            | .C.        | .A.        |            |
| PFD1160w_exon1_Kilifi_028           |           |            |            | .AT.       |            | .C.        | .A.        |            |
| PFD1160w_exon1_Kilifi_039           |           |            |            | .AT.       |            | .C.        | .A.        | .G.        |
| PFD1160w_exon1_Kilifi_044           |           |            |            |            |            |            |            |            |
| PFD1160w_exon1_Kilifi_045           |           |            |            | .AT.       |            | .C.        | .A.        | .G.        |
| PFD1160w_exon1_Kilifi_050           | .C.       |            |            |            |            |            |            |            |
| PFD1160w_exon1_Kilifi_051           |           |            |            | .AT.       |            |            |            |            |
| PFD1160w_exon1_Kilifi_052           |           |            |            | .AT.       |            | .C.        | .A.        | .G.        |
| PFD1160w_exon1_Kilifi_057           |           |            |            | .AT.       |            | .C.        | .A.        | .G.        |
| PFD1160w_exon1_Kilifi_062           |           |            |            |            |            | .C.        |            |            |
| PFD1160w_exon1_Kilifi_082           |           |            |            | .AT.       |            | .C.        | .A.        | .G.        |
| PFD1160w_exon1_Kilifi_084           |           |            |            | .AT.       |            | .C.        | .A.        | .G.        |
| PFD1160w_exon1_Kilifi_093           |           |            |            |            |            |            |            |            |
| PFD1160w_exon1_Kilifi_097           |           |            |            | .AT.       |            | .C.        | .A.        |            |
| PFD1160w_exon1_Kilifi_105           |           |            | .A.        |            |            |            |            |            |
| PFD1160w_exon1_Kilifi_110           |           |            |            | .AT.       |            | .C.        | .A.        |            |
| PFD1160w_exon1_Kilifi_124           |           |            |            | .AT.       |            | .C.        | .A.        |            |
| PFD1160w_exon1_Kilifi_150           |           |            |            |            |            |            |            |            |
| PFD1160w_exon1_Kilifi_153           |           |            |            |            |            |            |            |            |
| PFD1160w_exon1_Kilifi_160           |           |            |            | .AT.       |            | .C.        | .A.        | .G.        |
| PFD1160w_exon1_Kilifi_162           |           |            |            |            |            |            |            |            |
| PFD1160w_exon1_Kilifi_164           | .C.       |            |            |            |            |            |            |            |
| PFD1160w_exon1_Kilifi_186           |           |            |            |            |            | .C.        |            |            |
| PFD1160w_exon1_Kilifi_187           |           |            |            | .AT.       |            | .C.        | .A.        | .G.        |
| PFD1160w_exon1_Kilifi_191           |           |            |            | .AT.       |            | .C.        | .A.        | .G.        |
| PFD1160w_exon1_Kilifi_194           |           |            | .A.        |            |            |            |            |            |
| PFD1160w_exon1_Kilifi_199           |           |            | .A.        |            |            |            |            |            |
| PFD1160w_exon1_Kilifi_201           | .C.       |            |            |            |            |            |            |            |
| PFD1160w_exon1_Kilifi_202           |           |            |            | .AT.       |            | .C.        |            |            |
| PFD1160w_exon1_Kilifi_214           |           |            | .A.        |            |            |            |            |            |
| PFD1160w_exon1_Kilifi_216           |           |            |            |            |            |            |            |            |
| PFD1160w_exon1_Kilifi_229           |           |            |            | .A.        |            | .C.        | .A.        |            |
| PFD1160w_exon1_Kilifi_240           |           |            |            | .AT.       |            | .C.        | .A.        | .G.        |
| PFD1160w_exon1_Kilifi_247           |           |            | .A.        |            |            |            |            |            |
| PFD1160w_exon1_Kilifi_258           |           |            |            |            |            | .C.        |            |            |
| PFD1160w_exon1_Kilifi_262           |           |            |            |            |            | .C.        | .A.        | .G.        |
| PFD1160w_exon1_Kilifi_297           | .C.       |            |            |            |            |            |            |            |
| PFD1160w_exon1_Kilifi_298           |           |            |            |            |            | .C.        | .A.        | .G.        |
| PFD1160w_exon1_Kilifi_299           |           |            |            | .AT.       |            | .C.        | .A.        | .G.        |
| PFD1160w_exon1_Kilifi_301           |           |            |            |            |            |            |            |            |
| PFD1160w_exon1_Kilifi_302           |           |            |            | .AT.       |            | .C.        | .A.        | .G.        |
| PFD1160w_exon1_Kilifi_307           |           |            |            | .AT.       |            |            |            |            |
| PFD1160w_exon1_Kilifi_311           |           |            |            | .AT.       |            | .C.        | .A.        | .G.        |
| PFD1160w_exon1_Kilifi_314           |           |            |            | .AT.       |            | .C.        | .A.        | .G.        |
| PFD1160w_exon1_Kilifi_319           |           |            |            | .AT.       |            | .C.        | .A.        |            |
| PFD1160w_exon1_Kilifi_321           |           |            |            | .AT.       |            | .C.        | .A.        | .G.        |
| PFD1160w_exon1_Kilifi_322           |           |            |            | .AT.       |            | .C.        |            |            |
| PFD1160w_exon1_Kilifi_324           |           |            |            | .AT.       |            |            |            |            |
| PFD1160w_exon1_Kilifi_331           |           |            |            | .AT.       |            | .C.        |            |            |
| PFD1160w_exon1_Kilifi_336           |           |            | .A.        | .AT.       |            | .C.        |            | .G.        |
| PFD1160w_exon1_Kilifi_340           |           |            |            | .AT.       |            | .C.        | .A.        | .G.        |
| PFD1160w_exon1_Kilifi_343           |           |            |            | .AT.       |            | .C.        | .A.        | .G.        |
| PFD1160w_exon1_Kilifi_344           |           |            |            |            |            |            |            |            |
| PFD1160w_exon1_Kilifi_345           |           |            |            | .AT.       |            | .C.        | .A.        | .G.        |
| PFD1160w_exon1_Kilifi_348           |           |            |            | .AT.       |            | .C.        | .A.        | .G.        |
| PFD1160w_exon1_Kilifi_349           |           |            | .A.        |            |            |            |            |            |
| PFD1160w_exon1_Kilifi_356           |           |            | .A.        |            |            |            |            |            |
| PFD1160w_exon1_Kilifi_364           |           |            |            | .AT.       |            | .C.        | .A.        |            |
| PFD1160w_exon1_Kilifi_365           |           |            |            | .AT.       |            | .C.        | .A.        |            |
| PFD1160w_exon1_Kilifi_366           |           |            |            | .AT.       |            |            |            |            |
| PFD1160w_exon1_Kilifi_384           |           |            |            | .AT.       |            | .C.        | .A.        | .G.        |
| PFD1160w_exon1_Kilifi_389           |           |            |            |            |            | .C.        |            |            |
| PFD1160w_exon1_Kilifi_406           |           |            |            |            |            |            |            |            |
| PFD1160w_exon1_Kilifi_510           |           |            |            |            |            |            |            |            |
| <i>Plasmodium reichenowi</i> _exon1 |           |            |            | .T.        | .T.        | G..AG.     | .A.        | .G.        |











|                                     | 970         | 980        | 990         | 1000       | 1010               | 1020       | 1030        | 1040        |
|-------------------------------------|-------------|------------|-------------|------------|--------------------|------------|-------------|-------------|
| PFD1160w_3D7_exon1                  | GTTGAAAGAA  | GAGGCTATGG | AAATAGTCAT  | GTTAGGGGTA | ACGCACCTTA         | AAAAATTAGT | AATGGTGATG  | ATAATTATAA  |
| PFD1160w_exon1_Kilifi_017           | .....       | .....      | .....       | .....      | .....              | .....      | .....       | .....       |
| PFD1160w_exon1_Kilifi_528           | .....       | .....      | .....       | .....      | .....              | .....      | .....       | .....       |
| PFD1160w_exon1_Kilifi_019           | .....       | .....      | .....       | .....      | .....              | .....      | .....       | .....       |
| PFD1160w_exon1_Kilifi_020           | .....       | .....      | .....       | .....      | .....              | .....      | .....       | .....       |
| PFD1160w_exon1_Kilifi_023           | .....       | .....      | .....       | .....      | .....              | .....      | .....       | .....       |
| PFD1160w_exon1_Kilifi_027           | .....G..... | .....      | .....       | .....      | .....T.....        | .....      | .....       | .....       |
| PFD1160w_exon1_Kilifi_028           | .....       | .....      | .....       | .....      | .....T.....        | .....      | .....       | .....       |
| PFD1160w_exon1_Kilifi_039           | .....G..... | .....      | .....       | .....      | .....T.....        | .....      | .....       | .....       |
| PFD1160w_exon1_Kilifi_044           | .....       | .....      | .....       | .....      | .....              | .....      | .....       | .....       |
| PFD1160w_exon1_Kilifi_045           | .....       | .....      | .....       | .....      | .....              | .....      | .....       | .....       |
| PFD1160w_exon1_Kilifi_050           | .....       | .....      | .....       | .....      | .....              | .....      | .....       | .....       |
| PFD1160w_exon1_Kilifi_051           | .....       | .....      | .....       | .....      | .....T.....        | .....      | .....       | .....       |
| PFD1160w_exon1_Kilifi_052           | .....       | .....      | .....       | .....      | .....              | .....      | .....       | .....       |
| PFD1160w_exon1_Kilifi_057           | .....       | .....      | .....       | .....      | .....T.....        | .....      | .....       | .....       |
| PFD1160w_exon1_Kilifi_062           | .....       | .....      | .....       | .....      | .....T.....        | .....      | .....       | .....       |
| PFD1160w_exon1_Kilifi_082           | .....       | .....      | .....       | .....      | .....              | .....      | .....       | .....       |
| PFD1160w_exon1_Kilifi_084           | .....       | .....      | .....       | .....      | .....              | .....      | .....       | .....       |
| PFD1160w_exon1_Kilifi_093           | .....       | .....      | .....       | .....      | .....              | .....      | .....       | .....       |
| PFD1160w_exon1_Kilifi_097           | .....G..... | .....      | .....       | .....      | .....T.....        | .....      | .....       | .....       |
| PFD1160w_exon1_Kilifi_105           | .....       | .....      | .....       | .....      | .....              | .....      | .....       | .....       |
| PFD1160w_exon1_Kilifi_110           | .....G..... | .....      | .....       | .....      | .....T.....        | .....      | .....       | .....       |
| PFD1160w_exon1_Kilifi_124           | .....       | .....      | .....       | .....      | .....T.....        | .....      | .....       | .....       |
| PFD1160w_exon1_Kilifi_150           | .....       | .....      | .....       | .....      | .....T.....        | .....      | .....       | .....       |
| PFD1160w_exon1_Kilifi_153           | .....       | .....      | .....       | .....      | .....T.....        | .....      | .....       | .....       |
| PFD1160w_exon1_Kilifi_160           | .....       | .....      | .....       | .....      | .....              | .....      | .....       | .....       |
| PFD1160w_exon1_Kilifi_162           | .....       | .....      | .....       | .....      | .....T.....        | .....      | .....       | .....       |
| PFD1160w_exon1_Kilifi_164           | .....G..... | .....      | .....       | .....      | .....T.....        | .....      | .....       | .....       |
| PFD1160w_exon1_Kilifi_186           | .....G..... | .....      | .....       | .....      | .....T.....        | .....      | .....       | .....       |
| PFD1160w_exon1_Kilifi_187           | .....       | .....      | .....       | .....      | .....              | .....      | .....       | .....       |
| PFD1160w_exon1_Kilifi_191           | .....G..... | .....      | .....       | .....      | .....T.....        | .....      | .....       | .....       |
| PFD1160w_exon1_Kilifi_194           | .....G..... | .....      | .....       | .....      | .....T.....        | .....      | .....       | .....       |
| PFD1160w_exon1_Kilifi_199           | .....       | .....      | .....       | .....      | .....              | .....      | .....       | .....       |
| PFD1160w_exon1_Kilifi_201           | .....       | .....      | .....       | .....      | .....T.....        | .....      | .....       | .....       |
| PFD1160w_exon1_Kilifi_202           | .....       | .....      | .....       | .....      | .....T.....        | .....      | .....       | .....       |
| PFD1160w_exon1_Kilifi_214           | .....       | .....      | .....       | .....      | .....T.....        | .....      | .....       | .....       |
| PFD1160w_exon1_Kilifi_216           | .....       | .....      | .....       | .....      | .....              | .....      | .....       | .....       |
| PFD1160w_exon1_Kilifi_229           | .....G..... | .....      | .....       | .....      | .....T.....        | .....      | .....       | .....       |
| PFD1160w_exon1_Kilifi_240           | .....       | .....      | .....       | .....      | .....              | .....      | .....       | .....       |
| PFD1160w_exon1_Kilifi_247           | .....       | .....      | .....       | .....      | .....              | .....      | .....       | .....       |
| PFD1160w_exon1_Kilifi_258           | .....       | .....      | .....       | .....      | .....              | .....      | .....       | .....       |
| PFD1160w_exon1_Kilifi_262           | .....       | .....      | .....       | .....      | .....              | .....      | .....       | .....       |
| PFD1160w_exon1_Kilifi_297           | .....       | .....      | .....       | .....      | .....              | .....      | .....       | .....       |
| PFD1160w_exon1_Kilifi_298           | .....       | .....      | .....       | .....      | .....T.....        | .....      | .....       | .....       |
| PFD1160w_exon1_Kilifi_299           | .....       | .....      | .....       | .....      | .....              | .....      | .....       | .....       |
| PFD1160w_exon1_Kilifi_301           | .....       | .....      | .....       | .....      | .....T.....        | .....      | .....       | .....       |
| PFD1160w_exon1_Kilifi_302           | .....G..... | .....      | .....       | .....      | .....T.....        | .....      | .....       | .....       |
| PFD1160w_exon1_Kilifi_307           | .....       | .....      | .....       | .....      | .....T.....        | .....      | .....       | .....       |
| PFD1160w_exon1_Kilifi_311           | .....       | .....      | .....       | .....      | .....T.....        | .....      | .....       | .....       |
| PFD1160w_exon1_Kilifi_314           | .....       | .....      | .....       | .....      | .....              | .....      | .....       | .....       |
| PFD1160w_exon1_Kilifi_319           | .....       | .....      | .....       | .....      | .....              | .....      | .....       | .....       |
| PFD1160w_exon1_Kilifi_321           | .....       | .....      | .....       | .....      | .....              | .....      | .....       | .....       |
| PFD1160w_exon1_Kilifi_322           | .....       | .....      | .....       | .....      | .....T.....        | .....      | .....       | .....       |
| PFD1160w_exon1_Kilifi_324           | .....       | .....      | .....       | .....      | .....              | .....      | .....       | .....       |
| PFD1160w_exon1_Kilifi_331           | .....       | .....      | .....       | .....      | .....              | .....      | .....       | .....       |
| PFD1160w_exon1_Kilifi_336           | .....       | .....      | .....       | .....      | .....              | .....      | .....       | .....       |
| PFD1160w_exon1_Kilifi_340           | .....       | .....      | .....       | .....      | .....T.....        | .....      | .....       | .....       |
| PFD1160w_exon1_Kilifi_343           | .....       | .....      | .....       | .....      | .....              | .....      | .....       | .....       |
| PFD1160w_exon1_Kilifi_344           | .....       | .....      | .....       | .....      | .....T.....        | .....      | .....       | .....       |
| PFD1160w_exon1_Kilifi_345           | .....G..... | .....      | .....       | .....      | .....T.....        | .....      | .....       | .....       |
| PFD1160w_exon1_Kilifi_348           | .....       | .....      | .....       | .....      | .....              | .....      | .....       | .....       |
| PFD1160w_exon1_Kilifi_349           | .....       | .....      | .....       | .....      | .....              | .....      | .....       | .....       |
| PFD1160w_exon1_Kilifi_356           | .....       | .....      | .....       | .....      | .....              | .....      | .....       | .....       |
| PFD1160w_exon1_Kilifi_364           | .....G..... | .....      | .....       | .....      | .....T.....        | .....      | .....       | .....       |
| PFD1160w_exon1_Kilifi_365           | .....       | .....      | .....       | .....      | .....T.....        | .....      | .....       | .....       |
| PFD1160w_exon1_Kilifi_366           | .....       | .....      | .....       | .....      | .....T.....        | .....      | .....       | .....       |
| PFD1160w_exon1_Kilifi_384           | .....       | .....      | .....       | .....      | .....T.....        | .....      | .....       | .....       |
| PFD1160w_exon1_Kilifi_389           | .....       | .....      | .....       | .....      | .....              | .....      | .....       | .....       |
| PFD1160w_exon1_Kilifi_406           | .....       | .....      | .....       | .....      | .....              | .....      | .....       | .....       |
| PFD1160w_exon1_Kilifi_510           | .....       | .....      | .....       | .....      | .....              | .....      | .....       | .....       |
| <i>Plasmodium reichenowi</i> _exon1 | .....       | .....      | .....A..... | .....      | .....TT.....G..... | .....      | .....A..... | .....A..... |

|                                     | 1050       | 1060       | 1070       | 1080       | 1090       | 1100       | 1110       | 1120       |
|-------------------------------------|------------|------------|------------|------------|------------|------------|------------|------------|
| PFD1160w_3D7_exon1                  | AAGTCCCTCT | TCTAATTATA | TTGAAGTTGA | TTGTGCTGAA | GATAAATATT | TTCTATTAGA | AGATGGAAGT | AATCAATCAG |
| PFD1160w_exon1_Kilifi_017           |            |            |            |            | T          | .GT        | A          |            |
| PFD1160w_exon1_Kilifi_528           |            |            |            |            |            |            |            | C          |
| PFD1160w_exon1_Kilifi_019           |            |            | A          |            |            |            |            | C          |
| PFD1160w_exon1_Kilifi_020           |            |            |            |            |            |            |            | C          |
| PFD1160w_exon1_Kilifi_023           |            |            |            |            | T          | .GT        | A          |            |
| PFD1160w_exon1_Kilifi_027           |            |            |            |            |            |            |            | C          |
| PFD1160w_exon1_Kilifi_028           |            |            |            |            | T          | .GT        |            |            |
| PFD1160w_exon1_Kilifi_039           |            |            | A          |            | T          | .GT        |            |            |
| PFD1160w_exon1_Kilifi_044           |            |            |            |            |            |            |            | C          |
| PFD1160w_exon1_Kilifi_045           |            |            |            |            |            |            |            | C          |
| PFD1160w_exon1_Kilifi_050           |            |            |            |            |            |            |            | C          |
| PFD1160w_exon1_Kilifi_051           |            |            |            |            | T          | .GT        |            |            |
| PFD1160w_exon1_Kilifi_052           |            |            |            |            |            |            |            | C          |
| PFD1160w_exon1_Kilifi_057           |            |            |            |            | T          | .GT        | A          |            |
| PFD1160w_exon1_Kilifi_062           |            |            |            |            | T          | .GT        |            |            |
| PFD1160w_exon1_Kilifi_082           |            |            |            |            |            |            |            | C          |
| PFD1160w_exon1_Kilifi_084           |            |            | A          |            | T          | .GT        |            |            |
| PFD1160w_exon1_Kilifi_093           |            |            |            |            |            |            |            | C          |
| PFD1160w_exon1_Kilifi_097           |            |            |            |            | T          | .GT        |            |            |
| PFD1160w_exon1_Kilifi_105           |            |            |            |            |            |            |            | C          |
| PFD1160w_exon1_Kilifi_110           |            |            |            |            | T          | .GT        |            |            |
| PFD1160w_exon1_Kilifi_124           |            |            | A          |            |            |            |            |            |
| PFD1160w_exon1_Kilifi_150           |            |            |            |            | T          | .GT        |            |            |
| PFD1160w_exon1_Kilifi_153           |            |            |            |            | T          | .T         |            | C          |
| PFD1160w_exon1_Kilifi_160           |            |            | A          |            | T          | .GT        |            | C          |
| PFD1160w_exon1_Kilifi_162           |            |            |            |            | T          | .GT        |            | C          |
| PFD1160w_exon1_Kilifi_164           |            |            |            |            | T          | .GT        | A          |            |
| PFD1160w_exon1_Kilifi_186           |            |            | A          |            |            | .T         |            | C          |
| PFD1160w_exon1_Kilifi_187           |            |            |            |            |            |            |            | C          |
| PFD1160w_exon1_Kilifi_191           |            |            | A          |            | T          | .GT        |            |            |
| PFD1160w_exon1_Kilifi_194           |            |            |            |            | T          | .GT        |            | C          |
| PFD1160w_exon1_Kilifi_199           |            |            |            | T          |            |            |            | C          |
| PFD1160w_exon1_Kilifi_201           |            |            |            |            | T          | .GT        |            |            |
| PFD1160w_exon1_Kilifi_202           |            |            | A          |            |            |            |            | C          |
| PFD1160w_exon1_Kilifi_214           |            |            |            |            |            |            |            | C          |
| PFD1160w_exon1_Kilifi_216           |            |            |            |            |            |            |            | C          |
| PFD1160w_exon1_Kilifi_229           |            |            | A          |            | T          | .GT        |            | C          |
| PFD1160w_exon1_Kilifi_240           |            |            |            |            |            |            |            | C          |
| PFD1160w_exon1_Kilifi_247           |            |            |            |            | T          | .GT        |            |            |
| PFD1160w_exon1_Kilifi_258           |            |            |            |            | T          |            |            | C          |
| PFD1160w_exon1_Kilifi_262           |            |            |            |            | T          | .GT        | A          |            |
| PFD1160w_exon1_Kilifi_297           |            |            |            |            |            |            | A          |            |
| PFD1160w_exon1_Kilifi_298           |            |            |            |            | T          | .GT        | A          |            |
| PFD1160w_exon1_Kilifi_299           |            |            | A          |            | T          | .GT        |            |            |
| PFD1160w_exon1_Kilifi_301           |            |            |            |            |            |            |            | C          |
| PFD1160w_exon1_Kilifi_302           |            |            | A          |            | T          | .GT        |            |            |
| PFD1160w_exon1_Kilifi_307           |            |            | A          |            |            |            |            | C          |
| PFD1160w_exon1_Kilifi_311           |            |            | A          |            |            |            |            | C          |
| PFD1160w_exon1_Kilifi_314           |            |            | A          |            | T          | .GT        |            |            |
| PFD1160w_exon1_Kilifi_319           |            |            |            |            |            |            |            | C          |
| PFD1160w_exon1_Kilifi_321           |            |            | A          |            | T          | .GT        |            |            |
| PFD1160w_exon1_Kilifi_322           |            |            |            |            |            |            |            | C          |
| PFD1160w_exon1_Kilifi_324           |            |            |            |            | T          | .GT        |            |            |
| PFD1160w_exon1_Kilifi_331           |            |            |            |            | T          | .GT        |            | C          |
| PFD1160w_exon1_Kilifi_336           |            |            |            |            |            |            |            | C          |
| PFD1160w_exon1_Kilifi_340           |            |            |            |            | T          | .GT        | A          |            |
| PFD1160w_exon1_Kilifi_343           |            |            |            |            |            |            |            | C          |
| PFD1160w_exon1_Kilifi_344           |            |            |            |            | T          | .GT        | A          |            |
| PFD1160w_exon1_Kilifi_345           |            |            |            |            | T          | .GT        |            | C          |
| PFD1160w_exon1_Kilifi_348           |            |            |            |            |            |            |            | C          |
| PFD1160w_exon1_Kilifi_349           |            |            |            |            |            |            |            | C          |
| PFD1160w_exon1_Kilifi_356           |            |            |            |            |            |            |            | C          |
| PFD1160w_exon1_Kilifi_364           |            |            | A          |            | T          | .GT        |            |            |
| PFD1160w_exon1_Kilifi_365           |            |            |            |            |            |            |            | C          |
| PFD1160w_exon1_Kilifi_366           |            |            |            |            |            |            |            | C          |
| PFD1160w_exon1_Kilifi_384           |            |            |            |            |            |            | A          |            |
| PFD1160w_exon1_Kilifi_389           |            |            |            |            |            |            |            | C          |
| PFD1160w_exon1_Kilifi_406           |            |            |            |            | T          | .GT        | A          |            |
| PFD1160w_exon1_Kilifi_510           |            |            | A          |            | T          | .GT        |            |            |
| <i>Plasmodium reichenowi</i> _exon1 |            |            | A          | C          |            | .T         | .GT        |            |

|                             | 1130                | 1140                | 1150                | 1160                | 1170                | 1180                | 1190                | 1200                |
|-----------------------------|---------------------|---------------------|---------------------|---------------------|---------------------|---------------------|---------------------|---------------------|
| PFD1160w_3D7_exon1          | .... .... .... .... | .... .... .... .... | .... .... .... .... | .... .... .... .... | .... .... .... .... | .... .... .... .... | .... .... .... .... | .... .... .... .... |
| AAAATAGTTG TAAACAAAA        | TATAACTATT          | TTGTATCTAA          | TGATTATGAT          | GGTACTGGGT          | CTGCTATTTA          | TTCGACAGAT          |                     |                     |
| PFD1160w_exon1_Kilifi_017   | .....T.             | ...G.               | ...C.               | .....T.             | .....               | .....               | .....               | .....               |
| PFD1160w_exon1_Kilifi_528   | .....G.             | .....               | .....               | .....               | .....               | .....               | .....               | .....               |
| PFD1160w_exon1_Kilifi_019   | .....GT.            | .....               | .....               | .....               | .....               | .....               | .....               | .....               |
| PFD1160w_exon1_Kilifi_020   | .....G.             | .....               | .....               | .....               | .....               | .....               | .....               | .....               |
| PFD1160w_exon1_Kilifi_023   | .....T.             | ...G.               | ...C.               | .....T.             | .....               | .....               | .....               | .....               |
| PFD1160w_exon1_Kilifi_027   | .....               | ...G.               | ...C.               | .....               | .....               | .....               | .....               | .....               |
| PFD1160w_exon1_Kilifi_028   | .....G.             | .....               | .....               | .....               | .....               | .....               | .....               | .....               |
| PFD1160w_exon1_Kilifi_039   | .....G.             | ...C.               | .....T.             | .....               | .....               | .....               | .....               | .....               |
| PFD1160w_exon1_Kilifi_044   | .....G.             | .....               | .....               | .....               | .....               | .....               | .....               | .....               |
| PFD1160w_exon1_Kilifi_045   | .....G.             | .....               | .....               | .....               | .....               | .....               | .....               | .....               |
| PFD1160w_exon1_Kilifi_050   | .....G.             | .....               | .....               | .....               | .....               | .....               | .....               | .....               |
| PFD1160w_exon1_Kilifi_051   | .....T.             | ...G.               | ...C.               | .....T.             | .....               | .....               | .....               | .....               |
| PFD1160w_exon1_Kilifi_052   | .....G.             | .....               | .....               | .....               | .....               | .....               | .....               | .....               |
| PFD1160w_exon1_Kilifi_057   | .....T.             | ...G.               | ...C.               | .....               | .....               | .....               | .....               | .....               |
| PFD1160w_exon1_Kilifi_062   | .....T.             | ...G.               | ...C.               | .....T.             | .....               | .....               | .....               | .....               |
| PFD1160w_exon1_Kilifi_082   | .....GT.            | .....               | .....               | .....               | .....               | .....               | .....               | .....               |
| PFD1160w_exon1_Kilifi_084   | .....               | .....               | .....               | .....               | .....               | .....               | .....               | .....               |
| PFD1160w_exon1_Kilifi_093   | .....G.             | .....               | .....               | .....               | .....               | .....               | .....               | .....               |
| PFD1160w_exon1_Kilifi_097   | .....GT.            | .....               | .....               | .....               | .....               | .....               | .....               | .....               |
| PFD1160w_exon1_Kilifi_105   | .....C.             | .....               | .....               | .....               | .....               | .....               | .....               | .....               |
| PFD1160w_exon1_Kilifi_110   | .....GT.            | .....               | .....               | .....               | .....               | .....               | .....               | .....               |
| PFD1160w_exon1_Kilifi_124   | .....T.             | ...G.               | ...C.               | .....T.             | .....               | .....               | .....               | .....               |
| PFD1160w_exon1_Kilifi_150   | .....T.             | ...G.               | ...C.               | .....T.             | .....               | .....               | .....               | .....               |
| PFD1160w_exon1_Kilifi_153   | .....G.             | .....               | .....               | .....               | .....               | .....               | .....               | .....               |
| PFD1160w_exon1_Kilifi_160   | .....G.             | .....               | .....               | .....               | .....               | .....               | .....               | .....               |
| PFD1160w_exon1_Kilifi_162   | .....T.             | ...G.               | ...C.               | .....T.             | .....               | .....               | .....               | .....               |
| PFD1160w_exon1_Kilifi_164   | .....T.             | ...G.               | ...C.               | .....               | .....               | .....               | .....               | .....               |
| PFD1160w_exon1_Kilifi_186   | .....C.             | .....               | .....               | .....               | .....               | .....               | .....               | .....               |
| PFD1160w_exon1_Kilifi_187   | .....G.             | .....               | .....               | .....               | .....               | .....               | .....               | .....               |
| PFD1160w_exon1_Kilifi_191   | .....G.             | ...C.               | .....T.             | .....               | .....               | .....               | .....               | .....               |
| PFD1160w_exon1_Kilifi_194   | .....G.             | .....               | .....T.             | .....               | .....               | .....               | .....               | .....               |
| PFD1160w_exon1_Kilifi_199   | .....C.             | .....               | .....               | .....               | .....               | .....               | .....               | .....               |
| PFD1160w_exon1_Kilifi_201   | .....T.             | ...G.               | ...C.               | .....T.             | .....               | .....               | .....               | .....               |
| PFD1160w_exon1_Kilifi_202   | .....GT.            | .....               | .....               | .....               | .....               | .....               | .....               | .....               |
| PFD1160w_exon1_Kilifi_214   | .....GT.            | .....               | .....               | .....               | .....               | .....               | .....               | .....               |
| PFD1160w_exon1_Kilifi_216   | .....G.             | .....               | .....               | .....               | .....               | .....               | .....               | .....               |
| PFD1160w_exon1_Kilifi_229   | .....GT.            | .....               | .....               | .....               | .....               | .....               | .....               | .....               |
| PFD1160w_exon1_Kilifi_240   | .....C.             | .....               | .....               | .....               | .....               | .....               | .....               | .....               |
| PFD1160w_exon1_Kilifi_247   | .....G.             | .....               | .....               | .....               | .....               | .....               | .....               | .....               |
| PFD1160w_exon1_Kilifi_258   | .....G.             | .....               | .....               | .....               | .....               | .....               | .....               | .....               |
| PFD1160w_exon1_Kilifi_262   | .....T.             | ...G.               | ...C.               | .....T.             | .....               | .....               | .....               | .....               |
| PFD1160w_exon1_Kilifi_297   | .....T.             | ...G.               | ...C.               | .....T.             | .....               | .....               | .....               | .....               |
| PFD1160w_exon1_Kilifi_298   | .....T.             | ...G.               | ...C.               | .....T.             | .....               | .....               | .....               | .....               |
| PFD1160w_exon1_Kilifi_299   | .....               | .....               | .....               | .....               | .....               | .....               | .....               | .....               |
| PFD1160w_exon1_Kilifi_301   | .....G.             | .....               | .....               | .....               | .....               | .....               | .....               | .....               |
| PFD1160w_exon1_Kilifi_302   | .....G.             | ...C.               | .....T.             | .....               | .....               | .....               | .....               | .....               |
| PFD1160w_exon1_Kilifi_307   | .....G.             | .....               | .....               | .....               | .....               | .....               | .....               | .....               |
| PFD1160w_exon1_Kilifi_311   | .....G.             | .....               | .....               | .....               | .....               | .....               | .....               | .....               |
| PFD1160w_exon1_Kilifi_314   | .....G.             | .....               | .....               | .....               | .....               | .....               | .....               | .....               |
| PFD1160w_exon1_Kilifi_319   | .....GT.            | .....               | .....               | .....               | .....               | .....               | .....               | .....               |
| PFD1160w_exon1_Kilifi_321   | .....G.             | .....               | .....               | .....               | .....               | .....               | .....               | .....               |
| PFD1160w_exon1_Kilifi_322   | .....G.             | ...C.               | .....T.             | .....               | .....               | .....               | .....               | .....               |
| PFD1160w_exon1_Kilifi_324   | .....T.             | ...G.               | ...C.               | .....T.             | .....               | .....               | .....               | .....               |
| PFD1160w_exon1_Kilifi_331   | .....G.             | .....               | .....               | .....               | .....               | .....               | .....               | .....               |
| PFD1160w_exon1_Kilifi_336   | .....G.             | .....               | .....               | .....               | .....               | .....               | .....               | .....               |
| PFD1160w_exon1_Kilifi_340   | .....T.             | ...G.               | ...C.               | .....T.             | .....               | .....               | .....               | .....               |
| PFD1160w_exon1_Kilifi_343   | .....G.             | .....               | .....               | .....               | .....               | .....               | .....               | .....               |
| PFD1160w_exon1_Kilifi_344   | .....T.             | ...G.               | ...C.               | .....T.             | .....               | .....               | .....               | .....               |
| PFD1160w_exon1_Kilifi_345   | .....G.             | .....               | .....               | .....               | .....               | .....               | .....               | .....               |
| PFD1160w_exon1_Kilifi_348   | .....G.             | .....               | .....               | .....               | .....               | .....               | .....               | .....               |
| PFD1160w_exon1_Kilifi_349   | .....GT.            | .....               | .....               | .....               | .....               | .....               | .....               | .....               |
| PFD1160w_exon1_Kilifi_356   | .....GT.            | .....               | .....               | .....               | .....               | .....               | .....               | .....               |
| PFD1160w_exon1_Kilifi_364   | .....G.             | ...C.               | .....T.             | .....               | .....               | .....               | .....               | .....               |
| PFD1160w_exon1_Kilifi_365   | .....G.             | .....               | .....               | .....               | .....               | .....               | .....               | .....               |
| PFD1160w_exon1_Kilifi_366   | .....G.             | .....               | .....               | .....               | .....               | .....               | .....               | .....               |
| PFD1160w_exon1_Kilifi_384   | .....T.             | ...G.               | ...C.               | .....T.             | .....               | .....               | .....               | .....               |
| PFD1160w_exon1_Kilifi_389   | .....G.             | .....               | .....               | .....               | .....               | .....               | .....               | .....               |
| PFD1160w_exon1_Kilifi_406   | .....T.             | ...G.               | ...C.               | .....T.             | .....               | .....               | .....               | .....               |
| PFD1160w_exon1_Kilifi_510   | .....G.             | .....               | .....               | .....               | .....               | .....               | .....               | .....               |
| Plasmodium reichenowi_exon1 | ...G..T...          | .....T.             | -----               | -----               | ----.A.             | .AA.A..AT.          | ...T.....           | .....A.             |



|                                     | 1290        | 1300           | 1310        | 1320          | 1330        | 1340              | 1350       | 1360           |
|-------------------------------------|-------------|----------------|-------------|---------------|-------------|-------------------|------------|----------------|
| PFD1160w_3D7_exon1                  | .....       | .....          | .....       | .....         | .....       | .....             | .....      | .....          |
| PFD1160w_exon1_Kilifi_017           | TGTTTCTAAT  | GAGGGAAATC     | CTCTTGAGGG  | TGGGGAGGAA    | AAAAATAATG  | TTAAGATAAG        | TGAACAAAAT | GGTCGTAATC     |
| PFD1160w_exon1_Kilifi_528           | .....       | .....          | .....       | .....         | .....       | .....             | .....      | .....          |
| PFD1160w_exon1_Kilifi_019           | .....       | .....A.....    | .....       | .....         | .....       | .....             | .....      | .....          |
| PFD1160w_exon1_Kilifi_020           | .....       | .....          | .....       | .....         | .....       | .....             | .....      | .....          |
| PFD1160w_exon1_Kilifi_023           | .....       | .....          | .....       | .....         | .....       | .....C.....A..... | .....      | .....T.....    |
| PFD1160w_exon1_Kilifi_027           | .....       | .....A..A..... | .....       | .....G.....   | .....       | .....             | .....      | .....          |
| PFD1160w_exon1_Kilifi_028           | .....       | .....          | .....       | .....G.....   | .....       | .....C.....A..... | .....      | .....          |
| PFD1160w_exon1_Kilifi_039           | .....C..... | .....          | .....A..... | .....         | .....       | .....             | .....      | .....          |
| PFD1160w_exon1_Kilifi_044           | .....       | .....          | .....A..... | .....         | .....       | .....             | .....      | .....          |
| PFD1160w_exon1_Kilifi_045           | .....       | .....          | .....       | .....         | .....       | .....             | .....      | .....          |
| PFD1160w_exon1_Kilifi_050           | .....       | .....          | .....       | .....G.....   | .....       | .....C.....A..... | .....      | .....T.....    |
| PFD1160w_exon1_Kilifi_051           | .....       | .....          | .....       | .....         | .....       | .....C.....A..... | .....      | .....          |
| PFD1160w_exon1_Kilifi_052           | .....       | .....          | .....       | .....G.....   | .....       | .....C.....A..... | .....      | .....T.....    |
| PFD1160w_exon1_Kilifi_057           | .....       | .....          | .....       | .....         | .....       | .....             | .....      | .....          |
| PFD1160w_exon1_Kilifi_062           | .....       | .....          | .....       | .....         | .....       | .....C.....A..... | .....      | .....          |
| PFD1160w_exon1_Kilifi_082           | .....       | .....          | .....       | .....         | .....       | .....C.....A..... | .....      | .....          |
| PFD1160w_exon1_Kilifi_084           | .....       | .....          | .....       | .....         | .....       | .....             | .....      | .....          |
| PFD1160w_exon1_Kilifi_093           | .....       | .....          | .....       | .....         | .....       | .....             | .....      | .....          |
| PFD1160w_exon1_Kilifi_097           | .....       | .....A..A..... | .....       | .....G.....   | .....       | .....C.....A..... | .....      | .....T..A..... |
| PFD1160w_exon1_Kilifi_105           | .....       | .....          | .....A..... | .....         | .....       | .....             | .....      | .....          |
| PFD1160w_exon1_Kilifi_110           | .....       | .....A..A..... | .....       | .....G.....   | .....       | .....C.....A..... | .....      | .....T..A..... |
| PFD1160w_exon1_Kilifi_124           | .....       | .....          | .....       | .....         | .....       | .....C.....A..... | .....      | .....          |
| PFD1160w_exon1_Kilifi_150           | .....       | .....          | .....       | .....         | .....       | .....             | .....      | .....          |
| PFD1160w_exon1_Kilifi_153           | .....       | .....          | .....       | .....         | .....       | .....C.....A..... | .....      | .....          |
| PFD1160w_exon1_Kilifi_160           | .....       | .....          | .....       | .....         | .....       | .....             | .....      | .....          |
| PFD1160w_exon1_Kilifi_162           | .....       | .....          | .....       | .....         | .....       | .....C.....A..... | .....      | .....          |
| PFD1160w_exon1_Kilifi_164           | .....       | .....          | .....       | .....         | .....       | .....             | .....      | .....          |
| PFD1160w_exon1_Kilifi_186           | .....       | .....          | .....       | .....         | .....       | .....             | .....      | .....          |
| PFD1160w_exon1_Kilifi_187           | .....       | .....          | .....       | .....         | .....       | .....             | .....      | .....          |
| PFD1160w_exon1_Kilifi_191           | .....       | .....          | .....       | .....         | .....       | .....C.....A..... | .....      | .....T.....    |
| PFD1160w_exon1_Kilifi_194           | .....       | .....A..A..... | .....       | .....G.....   | .....       | .....C.....A..... | .....      | .....T.....    |
| PFD1160w_exon1_Kilifi_199           | .....       | .....          | .....       | .....G.....   | .....       | .....C.....A..... | .....      | .....T.....    |
| PFD1160w_exon1_Kilifi_201           | .....       | .....          | .....       | .....         | .....       | .....C.....A..... | .....      | .....          |
| PFD1160w_exon1_Kilifi_202           | .....       | .....          | .....       | .....G.....   | .....       | .....C.....A..... | .....      | .....          |
| PFD1160w_exon1_Kilifi_214           | .....       | .....A..A..... | .....       | .....G.....   | .....       | .....C.....A..... | .....      | .....T..A..... |
| PFD1160w_exon1_Kilifi_216           | .....       | .....A..A..... | .....       | .....G.....   | .....       | .....C.....       | .....      | .....          |
| PFD1160w_exon1_Kilifi_229           | .....       | .....          | .....       | .....G.....   | .....       | .....C.....A..... | .....      | .....T.....    |
| PFD1160w_exon1_Kilifi_240           | .....       | .....A..A..... | .....       | .....G.....   | .....       | .....C.....A..... | .....      | .....T.....    |
| PFD1160w_exon1_Kilifi_247           | .....       | .....          | .....       | .....         | .....       | .....             | .....      | .....          |
| PFD1160w_exon1_Kilifi_258           | .....       | .....          | .....       | .....         | .....       | .....             | .....      | .....          |
| PFD1160w_exon1_Kilifi_262           | .....       | .....          | .....       | .....         | .....       | .....C.....       | .....      | .....          |
| PFD1160w_exon1_Kilifi_297           | .....       | .....          | .....       | .....         | .....       | .....C.....A..... | .....      | .....          |
| PFD1160w_exon1_Kilifi_298           | .....       | .....          | .....       | .....         | .....       | .....C.....A..... | .....      | .....          |
| PFD1160w_exon1_Kilifi_299           | .....       | .....          | .....       | .....         | .....       | .....C.....A..... | .....      | .....          |
| PFD1160w_exon1_Kilifi_301           | .....       | .....          | .....       | .....         | .....       | .....C.....       | .....      | .....          |
| PFD1160w_exon1_Kilifi_302           | .....       | .....          | .....       | .....         | .....       | .....C.....       | .....      | .....          |
| PFD1160w_exon1_Kilifi_307           | .....       | .....          | .....       | .....         | .....       | .....             | .....      | .....          |
| PFD1160w_exon1_Kilifi_311           | .....       | .....          | .....       | .....         | .....       | .....             | .....      | .....          |
| PFD1160w_exon1_Kilifi_314           | .....       | .....          | .....       | .....         | .....       | .....             | .....      | .....          |
| PFD1160w_exon1_Kilifi_319           | .....       | .....A..A..... | .....       | .....G.....   | .....       | .....C.....A..... | .....      | .....T..A..... |
| PFD1160w_exon1_Kilifi_321           | .....       | .....          | .....       | .....         | .....       | .....C.....A..... | .....      | .....          |
| PFD1160w_exon1_Kilifi_322           | .....       | .....          | .....       | .....         | .....       | .....             | .....      | .....          |
| PFD1160w_exon1_Kilifi_324           | .....       | .....          | .....       | .....         | .....       | .....C.....A..... | .....      | .....          |
| PFD1160w_exon1_Kilifi_331           | .....       | .....          | .....       | .....         | .....       | .....             | .....      | .....          |
| PFD1160w_exon1_Kilifi_336           | .....       | .....          | .....       | .....         | .....       | .....             | .....      | .....          |
| PFD1160w_exon1_Kilifi_340           | .....       | .....          | .....       | .....         | .....       | .....             | .....      | .....          |
| PFD1160w_exon1_Kilifi_343           | .....       | .....          | .....       | .....G.....   | .....       | .....             | .....      | .....          |
| PFD1160w_exon1_Kilifi_344           | .....       | .....          | .....       | .....G.....   | .....       | .....             | .....      | .....          |
| PFD1160w_exon1_Kilifi_345           | .....       | .....          | .....       | .....         | .....       | .....C.....       | .....      | .....          |
| PFD1160w_exon1_Kilifi_348           | .....       | .....          | .....       | .....         | .....       | .....C.....A..... | .....      | .....T.....    |
| PFD1160w_exon1_Kilifi_349           | .....       | .....          | .....       | .....         | .....       | .....C.....A..... | .....      | .....T..A..... |
| PFD1160w_exon1_Kilifi_356           | .....       | .....A..A..... | .....       | .....G.....   | .....       | .....C.....A..... | .....      | .....T..A..... |
| PFD1160w_exon1_Kilifi_364           | .....       | .....          | .....       | .....         | .....       | .....C.....A..... | .....      | .....          |
| PFD1160w_exon1_Kilifi_365           | .....       | .....          | .....       | .....         | .....       | .....             | .....      | .....          |
| PFD1160w_exon1_Kilifi_366           | .....       | .....          | .....       | .....         | .....       | .....C.....A..... | .....      | .....          |
| PFD1160w_exon1_Kilifi_384           | .....       | .....          | .....       | .....         | .....       | .....             | .....      | .....          |
| PFD1160w_exon1_Kilifi_389           | .....       | .....          | .....       | .....         | .....       | .....C.....A..... | .....      | .....T.....    |
| PFD1160w_exon1_Kilifi_406           | .....       | .....          | .....       | .....         | .....       | .....C.....       | .....      | .....          |
| PFD1160w_exon1_Kilifi_510           | .....       | .....          | .....       | .....         | .....       | .....             | .....      | .....          |
| <i>Plasmodium reichenowi</i> _exon1 | -----       | -----          | -----       | .....A...A... | .....G..... | A...T.C...        | .....T.    | TC.G....G      |

|                                     | 1370        | 1380       | 1390       | 1400        | 1410       | 1420       | 1430        | 1440              |
|-------------------------------------|-------------|------------|------------|-------------|------------|------------|-------------|-------------------|
| PFD1160w_3D7_exon1                  | .... ....   | .... ....  | .... ....  | .... ....   | .... ....  | .... ....  | .... ....   | .... ....         |
| PFD1160w_exon1_Kilifi_017           | TGGAAAGTTC  | TGTAGGAACA | GATAAGGGTT | CAGATAAAAA  | TGAAGAAGAA | GTAGCTGCTA | CTTGTGATCC  | AAACGATCGA        |
| PFD1160w_exon1_Kilifi_528           | .....       | .....      | .....      | A.....      | .....      | .....      | .....G..... | .....G.....       |
| PFD1160w_exon1_Kilifi_019           | .....       | .....      | .....      | .....       | .....      | .....      | .....       | .....G.....       |
| PFD1160w_exon1_Kilifi_020           | .....       | .....      | .....      | T.G.....    | A.....     | .....      | .....       | .....G.....       |
| PFD1160w_exon1_Kilifi_023           | .....       | .....      | .....      | T.....      | .....      | T.....     | .....       | .....G.....       |
| PFD1160w_exon1_Kilifi_027           | .....       | .....      | .....      | T.G.....    | A.....     | .....      | .....       | .....G.....       |
| PFD1160w_exon1_Kilifi_028           | .....       | .....      | .....      | .....       | .....      | .....      | .....       | .....G.....       |
| PFD1160w_exon1_Kilifi_039           | .....       | .....      | .....      | .....       | .....      | T.....     | .....       | .....G.....       |
| PFD1160w_exon1_Kilifi_044           | .....       | .....      | .....      | T.G.....    | A.....     | .....      | .....A..... | .....             |
| PFD1160w_exon1_Kilifi_045           | .....       | .....      | .....      | G.....      | A.....     | .....      | .....       | .....             |
| PFD1160w_exon1_Kilifi_050           | .....       | .....      | .....      | .....       | .....      | T.....     | .....       | .....GC.....      |
| PFD1160w_exon1_Kilifi_051           | .....       | .....      | .....      | .....       | .....      | .....      | .....G..... | .....G.....       |
| PFD1160w_exon1_Kilifi_052           | .....       | .....      | .....      | .....       | .....      | T.....     | .....       | .....GC.....      |
| PFD1160w_exon1_Kilifi_057           | .....       | .....      | .....      | G.....      | A.....     | .....      | .....       | .....G.....       |
| PFD1160w_exon1_Kilifi_062           | .....       | .....      | .....      | .....       | .....      | .....      | .....       | .....G.....       |
| PFD1160w_exon1_Kilifi_082           | .....       | .....      | .....      | .....       | .....      | .....      | .....       | .....GC.....      |
| PFD1160w_exon1_Kilifi_084           | .....       | .....      | .....      | .....       | .....      | .....      | .....       | .....G.....       |
| PFD1160w_exon1_Kilifi_093           | .....       | .....      | .....      | T.G.....    | A.....     | T.....     | .....       | .....G.....       |
| PFD1160w_exon1_Kilifi_097           | .....       | .....      | .....      | .....       | .....      | T.....     | .....       | .....G.....       |
| PFD1160w_exon1_Kilifi_105           | .....       | .....      | .....      | T.G.....    | A.....     | .....      | .....       | .....G.....       |
| PFD1160w_exon1_Kilifi_110           | .....       | .....      | .....      | .....       | .....      | T.....     | .....       | .....G.....       |
| PFD1160w_exon1_Kilifi_124           | .....       | .....      | .....      | .....       | .....      | .....      | .....       | .....G.....       |
| PFD1160w_exon1_Kilifi_150           | .....       | .....      | .....      | T.G.....    | A.....     | .....      | .....G..... | .....G.....       |
| PFD1160w_exon1_Kilifi_153           | .....       | .....      | .....      | .....       | .....      | .....      | .....       | .....G.....       |
| PFD1160w_exon1_Kilifi_160           | .....       | .....      | .....      | T.G.....    | A.....     | .....      | .....       | .....G.....       |
| PFD1160w_exon1_Kilifi_162           | .....       | .....      | .....      | G.....      | .....      | .....      | .....       | .....G.....       |
| PFD1160w_exon1_Kilifi_164           | .....       | .....      | .....      | .....       | .....      | .....      | .....       | .....G.....       |
| PFD1160w_exon1_Kilifi_186           | .....       | .....      | .....      | T.G.....    | A.....     | .....      | .....       | .....G.....       |
| PFD1160w_exon1_Kilifi_187           | .....       | .....      | .....      | .....       | .....      | T.....     | .....       | .....G.....       |
| PFD1160w_exon1_Kilifi_191           | .....       | .....      | .....      | .....       | .....      | .....      | .....G..... | .....G.....       |
| PFD1160w_exon1_Kilifi_194           | .....       | .....      | .....      | .....       | .....      | T.....     | .....       | .....G.....       |
| PFD1160w_exon1_Kilifi_199           | .....       | .....      | .....      | .....       | .....      | T.....     | .....       | .....GC.....      |
| PFD1160w_exon1_Kilifi_201           | .....       | .....      | .....      | .....       | .....      | .....      | .....       | .....G.....       |
| PFD1160w_exon1_Kilifi_202           | .....       | .....      | .....      | .....       | .....      | .....      | .....       | .....G.....       |
| PFD1160w_exon1_Kilifi_214           | .....       | .....      | .....      | .....       | .....      | .....      | .....       | .....G.....       |
| PFD1160w_exon1_Kilifi_216           | .....       | .....      | .....      | T.G.....    | A.....     | .....      | .....       | .....G.....       |
| PFD1160w_exon1_Kilifi_229           | .....       | .....      | .....      | .....       | .....      | .....      | .....       | .....G.....       |
| PFD1160w_exon1_Kilifi_240           | .....       | .....      | .....      | .....       | .....      | T.....     | .....       | .....G.....       |
| PFD1160w_exon1_Kilifi_247           | .....       | .....      | .....      | .....       | .....      | .....      | .....       | .....G.....       |
| PFD1160w_exon1_Kilifi_258           | .....       | .....      | .....      | G.....      | A.....     | .....      | .....       | .....G.....       |
| PFD1160w_exon1_Kilifi_262           | .....       | .....      | .....      | T.....      | .....      | T.....     | .....       | .....G.....       |
| PFD1160w_exon1_Kilifi_297           | .....       | .....      | .....      | .....       | .....      | .....      | .....G..... | .....G.....       |
| PFD1160w_exon1_Kilifi_298           | .....       | .....      | .....      | .....       | .....      | .....      | .....       | .....G.....       |
| PFD1160w_exon1_Kilifi_299           | .....       | .....      | .....      | .....       | .....      | .....      | .....G..... | .....G.....       |
| PFD1160w_exon1_Kilifi_301           | .....       | .....      | .....      | .....       | .....      | .....      | .....       | .....G.....       |
| PFD1160w_exon1_Kilifi_302           | .....       | .....      | .....      | .....       | .....      | T.....     | .....       | .....G.....       |
| PFD1160w_exon1_Kilifi_307           | .....       | .....      | .....      | T.G.....    | A.....     | .....      | .....       | .....G.....       |
| PFD1160w_exon1_Kilifi_311           | .....       | .....      | .....      | T.G.....    | A.....     | .....      | .....       | .....G.....       |
| PFD1160w_exon1_Kilifi_314           | .....       | .....      | .....      | .....       | .....      | .....      | .....       | .....G.....       |
| PFD1160w_exon1_Kilifi_319           | .....       | .....      | .....      | .....       | .....      | .....      | .....       | .....G.....       |
| PFD1160w_exon1_Kilifi_321           | .....       | .....      | .....      | .....       | .....      | .....      | .....G..... | .....G.....       |
| PFD1160w_exon1_Kilifi_322           | .....       | .....      | .....      | .....       | .....      | .....      | .....       | .....G.....       |
| PFD1160w_exon1_Kilifi_324           | .....       | .....      | .....      | .....       | .....      | T.....     | .....G..... | .....G.....       |
| PFD1160w_exon1_Kilifi_331           | .....       | .....      | .....      | .....       | .....      | .....      | .....G..... | .....G.....       |
| PFD1160w_exon1_Kilifi_336           | .....       | .....      | .....      | T.G.....    | A.....     | .....      | .....       | .....G.....       |
| PFD1160w_exon1_Kilifi_340           | .....       | .....      | .....      | T.G.....    | A.....     | ---        | .....       | .....G.....       |
| PFD1160w_exon1_Kilifi_343           | .....       | .....      | .....      | G.....      | A.....     | ---        | .....       | .....G.....       |
| PFD1160w_exon1_Kilifi_344           | .....       | .....      | .....      | T.G.....    | A.....     | ---        | .....       | .....G.....       |
| PFD1160w_exon1_Kilifi_345           | .....       | .....      | .....      | T.G.....    | A.....     | .....      | .....A..... | .....G.....       |
| PFD1160w_exon1_Kilifi_348           | .....       | .....      | .....      | T.....      | .....      | .....      | T.....      | .....G.....       |
| PFD1160w_exon1_Kilifi_349           | .....       | .....      | .....      | .....       | .....      | .....      | .....       | .....G.....       |
| PFD1160w_exon1_Kilifi_356           | .....       | .....      | .....      | .....       | .....      | .....      | .....       | .....G.....       |
| PFD1160w_exon1_Kilifi_364           | .....       | .....      | .....      | .....       | .....      | .....      | .....G..... | .....G.....       |
| PFD1160w_exon1_Kilifi_365           | .....       | .....      | .....      | .....       | .....      | .....      | .....       | .....G.....       |
| PFD1160w_exon1_Kilifi_366           | .....       | .....      | .....      | .....       | .....      | .....      | .....G..... | .....G.....       |
| PFD1160w_exon1_Kilifi_384           | .....       | .....      | .....      | T.G.....    | A.....     | .....      | .....       | .....G.....       |
| PFD1160w_exon1_Kilifi_389           | .....       | .....      | .....      | .....       | .....      | T.....     | .....       | .....G.....       |
| PFD1160w_exon1_Kilifi_406           | .....       | .....      | .....      | .....       | .....      | T.....     | .....       | .....G.....       |
| PFD1160w_exon1_Kilifi_510           | .....       | .....      | .....      | .....       | .....      | .....      | .....       | .....G.....       |
| <i>Plasmodium reichenowi</i> _exon1 | CA....A.... | .....T.... | .....G.... | .....C.G.C. | .....      | .....T.G   | A.....      | .....G.....G..... |



|                                     | 1450       | 1460        | 1470       | 1480        | 1490       | 1500        | 1510         | 1520        |
|-------------------------------------|------------|-------------|------------|-------------|------------|-------------|--------------|-------------|
| PFD1160w_3D7_exon1                  | .... ....  | .... ....   | .... ....  | .... ....   | .... ....  | .... ....   | .... ....    | .... ....   |
| PFD1160w_exon1_Kilifi_017           | AACGTGTTTG | ATGGAAGATA  | TATAAATGTT | GATTATATAA  | GAGGTTTATT | AAAGGGTAAA  | CGTTCGTGTT   | CAGATGGAAG  |
| PFD1160w_exon1_Kilifi_528           | G.T..CA... | ...C..ATC.  | A...CC.... | ..A..CT...  | ..AA.....  | ..G...AG..  | .....T.....  | .....T..... |
| PFD1160w_exon1_Kilifi_019           | ....CG...  | ....C..ATC. | A...GC.... | ..A..CT...  | ..AA.....  | ..G...AG..  | .....T.....  | .....T..... |
| PFD1160w_exon1_Kilifi_020           | G.....     | .....       | .....      | .....       | .....      | .....       | .....        | .....       |
| PFD1160w_exon1_Kilifi_023           | ....CG...  | ....C..ATC. | A...CTAC.. | .....T.T.   | A...C...C  | ..G...A...  | G.....T..... | .....T..... |
| PFD1160w_exon1_Kilifi_027           | ..T..CA... | ....C..ATC. | A...GC.... | ..A..CT...  | ..AA.....  | ..G...AG..  | .....T.....  | .....T..... |
| PFD1160w_exon1_Kilifi_028           | G....CA... | .....TC.    | A...C..... | .....T...   | .....C     | .....A...   | .....T.....  | .....T..... |
| PFD1160w_exon1_Kilifi_039           | .....      | .....       | .....      | .....       | .....      | .....       | .....        | .....       |
| PFD1160w_exon1_Kilifi_044           | ....CG...  | ....T..ATA. | A...TC.... | ..A..CT...  | ..AA.....  | ..G...AG..  | .....T.....  | .....T..... |
| PFD1160w_exon1_Kilifi_045           | ....CG...  | ....T.....  | ....TC.... | ..A..CT...  | ..A.....C  | ..G...AG..  | .....T.....  | .....T..... |
| PFD1160w_exon1_Kilifi_050           | G.....     | ....C..ATC. | A...CTAC.. | .....T.T.   | A...C...C  | ..G...A...  | G.....T..... | .....T..... |
| PFD1160w_exon1_Kilifi_051           | G.T..CA... | ....C..ATC. | A...GC.... | ..A..CT...  | ..AAA....  | ..G...AG..  | .....T.....  | .....T..... |
| PFD1160w_exon1_Kilifi_052           | G.....     | ....C..ATC. | A...CTAC.. | .....T.T.   | A...C...C  | ..G...A...  | G.....T..... | .....T..... |
| PFD1160w_exon1_Kilifi_057           | G.T..CA... | ....C..ATC. | A...CC.... | ..A..CT...  | ..AAA....  | ..G...AG..  | .....T.....  | .....T..... |
| PFD1160w_exon1_Kilifi_062           | G.T..CA... | ....C..ATC. | A...CC.... | ..A..CT...  | ..AA.....  | ..G...AG..  | .....T.....  | .....T..... |
| PFD1160w_exon1_Kilifi_082           | G.A.....   | ....C..ATC. | A...CTAC.. | .....T.T.   | A...C...C  | ..G...A...  | G.....T..... | .....T..... |
| PFD1160w_exon1_Kilifi_084           | ....CG...  | ....T..CTA. | A...TC.... | ..A..CT...  | ..AA.....  | ..G...AG..  | .....T.....  | .....T..... |
| PFD1160w_exon1_Kilifi_093           | ..T..CA... | ....C..ATC. | A...GC.... | ..A..CT...  | ..AAA....  | ..G...AG..  | .....T.....  | .....T..... |
| PFD1160w_exon1_Kilifi_097           | G.T..CA... | ....C..ATC. | A...CTAT.. | .....T.T.   | A...C...C  | ..G...A...  | G.....T..... | .....T..... |
| PFD1160w_exon1_Kilifi_105           | ....CG...  | ....C..ATC. | A...GC.... | ..A..CT...  | ..AA.....  | ..G...AG..  | .....T.....  | .....T..... |
| PFD1160w_exon1_Kilifi_110           | G.T..CA... | ....C..ATC. | A...CTAT.. | .....T.T.   | A...C...C  | ..G...A...  | G.....T..... | .....T..... |
| PFD1160w_exon1_Kilifi_124           | G.T..C.... | ....C..ATC. | A...GC.... | ..A..CT...  | ..AA.....  | ..G...AG..  | .....T.....  | .....T..... |
| PFD1160w_exon1_Kilifi_150           | G.T..CA... | ....C..ATC. | A...CC.... | ..A..CT...  | ..AA.....  | ..G...AG..  | .....T.....  | .....T..... |
| PFD1160w_exon1_Kilifi_153           | .....      | .....       | .....      | .....       | .....      | .....       | .....        | .....       |
| PFD1160w_exon1_Kilifi_160           | ....CG...  | ....T..ATA. | A...TC.... | ..A..CT...  | ..AAA....  | ..G...AG..  | .....T.....  | .....T..... |
| PFD1160w_exon1_Kilifi_162           | G.T..CA... | ....C..ATC. | A...GC.... | ..CA..CT... | ..AA.....  | ..G...AG..  | .....T.....  | .....T..... |
| PFD1160w_exon1_Kilifi_164           | G.....     | .....       | .....      | .....       | .....      | .....       | .....        | .....       |
| PFD1160w_exon1_Kilifi_186           | ....CG...  | ....C..ATC. | A...TC.... | ..A..CT...  | ..AA.....  | ..G...AG..  | .....T.....  | .....T..... |
| PFD1160w_exon1_Kilifi_187           | .....      | .....       | .....      | .....       | .....      | .....       | .....        | .....       |
| PFD1160w_exon1_Kilifi_191           | G.T..CA... | ....C..ATC. | A...CC.... | ..A..CT...  | ..AA.....  | ..G...AG..  | .....T.....  | .....T..... |
| PFD1160w_exon1_Kilifi_194           | G.....     | ....C..ATC. | A...CTAC.. | .....T.T.   | A...C...C  | ..G...A...  | G.....T..... | .....T..... |
| PFD1160w_exon1_Kilifi_199           | G.....     | ....C..ATC. | A...CTAC.. | .....T.T.   | A...C...C  | ..G...A...  | G.....T..... | .....T..... |
| PFD1160w_exon1_Kilifi_201           | ....CG...  | ....C..ATC. | A...CC.... | ..A..CT...  | ..AA.....  | ..G...AG..  | .....T.....  | .....T..... |
| PFD1160w_exon1_Kilifi_202           | T.T..CG... | ....C..ATA. | A...TT.... | .....T...   | .....C...C | ..G...A...  | .....T.....  | .....T..... |
| PFD1160w_exon1_Kilifi_214           | .....      | .....       | .....      | .....       | .....      | .....       | .....        | .....       |
| PFD1160w_exon1_Kilifi_216           | ....CG...  | ....T..CTA. | A...TC.... | ..A..CT...  | ..AA.....  | ..G...AG..  | .....T.....  | .....T..... |
| PFD1160w_exon1_Kilifi_229           | G.....     | .....       | .....      | .....       | .....      | .....       | .....        | .....       |
| PFD1160w_exon1_Kilifi_240           | GCT..CA... | ....C..ATC. | A...CC.... | ..A..CT...  | ..AA.....  | .....       | .....        | .....       |
| PFD1160w_exon1_Kilifi_247           | G.....     | .....       | .....      | .....       | .....      | .....       | .....        | .....       |
| PFD1160w_exon1_Kilifi_258           | ....CG...  | ....C..ATC. | A...GC.... | ..A..CT...  | ..AA.....  | ..G...AG..  | .....T.....  | .....T..... |
| PFD1160w_exon1_Kilifi_262           | ..T..CA... | ....C..ATC. | A...GC.... | ..A..CT...  | ..AA.....  | ..G...AG..  | .....T.....  | .....T..... |
| PFD1160w_exon1_Kilifi_297           | G.T..CA... | ....C..ATC. | A...GC.... | ..CA..CT... | ..AA.....  | ..G...AG..  | .....T.....  | .....T..... |
| PFD1160w_exon1_Kilifi_298           | ....CG...  | ....T..ATA. | A...TC.... | ..A..CT...  | ..AAA....  | ..G...AG..  | .....T.....  | .....T..... |
| PFD1160w_exon1_Kilifi_299           | G.T..CA... | ....C..ATC. | A...CC.... | ..A..CT...  | ..AA.....  | ..G...AG..  | .....T.....  | .....T..... |
| PFD1160w_exon1_Kilifi_301           | ..T..CA... | ....C..ATC. | A...TC.... | ..A..CT...  | ..AA.....  | ..G...AG..  | .....T.....  | .....T..... |
| PFD1160w_exon1_Kilifi_302           | .....      | .....       | .....      | .....       | .....      | .....       | .....        | .....       |
| PFD1160w_exon1_Kilifi_307           | G.T..CA... | ....C..ATC. | A...CC.... | ..A..CT...  | ..AA.....  | ..G...AG..  | .....T.....  | .....T..... |
| PFD1160w_exon1_Kilifi_311           | G.T..CA... | ....C..ATC. | A...CC.... | ..A..CT...  | ..AA.....  | ..G...AG..  | .....T.....  | .....T..... |
| PFD1160w_exon1_Kilifi_314           | ....CG...  | ....T..CTA. | A...TC.... | ..A..CT...  | ..AA.....  | ..G...AG..  | .....T.....  | .....T..... |
| PFD1160w_exon1_Kilifi_319           | .....      | .....       | .....      | .....       | .....      | .....       | .....        | .....       |
| PFD1160w_exon1_Kilifi_321           | G.T..CA... | ....C..ATC. | A...CC.... | ..A..CT...  | ..AA.....  | ..G...AG..  | .....T.....  | .....T..... |
| PFD1160w_exon1_Kilifi_322           | G....C.... | ....C..A.C. | A...C....  | ..A..CT...  | ..AA.....  | ..G...AG..  | .....T.....  | .....T..... |
| PFD1160w_exon1_Kilifi_324           | G.T..CA... | ....C..ATC. | A...CC.... | ..A..CT...  | ..AAA....  | ..G...AG..  | .....T.....  | .....T..... |
| PFD1160w_exon1_Kilifi_331           | G.T..CA... | ....C..ATC. | A...CC.... | ..A..CT...  | ..AA.....  | ..G...AG..  | .....T.....  | .....T..... |
| PFD1160w_exon1_Kilifi_336           | G.T..CA... | ....C..ATC. | A...CC.... | ..A..CT...  | ..AAA....  | ..G...AG..  | .....T.....  | .....T..... |
| PFD1160w_exon1_Kilifi_340           | ....CG...  | ....T..ATA. | A...TC.... | ..A..CT...  | ..AA.....  | ..G...AG..  | .....T.....  | .....T..... |
| PFD1160w_exon1_Kilifi_343           | ....CG...  | ....T..ATA. | A...TC.... | ..A..CT...  | ..AA.....  | ..G...AG..  | .....T.....  | .....T..... |
| PFD1160w_exon1_Kilifi_344           | ....CG...  | ....T..ATA. | A...TC.... | ..A..CT...  | ..AA.....  | ..G...AG..  | .....T.....  | .....T..... |
| PFD1160w_exon1_Kilifi_345           | ....CG...  | ....C..ATA. | A...CC.... | ..A..CT...  | ..AA.....  | ..G...AG..  | .....T.....  | .....T..... |
| PFD1160w_exon1_Kilifi_348           | ..T..CA... | ....C..ATC. | A...GC.... | ..A..CT...  | ..AA.....  | ..G...AG..  | .....T.....  | .....T..... |
| PFD1160w_exon1_Kilifi_349           | .....      | .....       | .....      | .....       | .....      | .....       | .....        | .....       |
| PFD1160w_exon1_Kilifi_356           | .....      | .....       | .....      | .....       | .....      | .....       | .....        | .....       |
| PFD1160w_exon1_Kilifi_364           | G.T..CA... | ....C..ATC. | A...CC.... | ..A..CT...  | ..AA.....  | ..G...AG..  | .....T.....  | .....T..... |
| PFD1160w_exon1_Kilifi_365           | ....CG...  | ....C..ATC. | A...GC.... | ..A..CT...  | ..AA.....  | ..G...AG..  | .....T.....  | .....T..... |
| PFD1160w_exon1_Kilifi_366           | G.T..CA... | ....C..ATC. | A...CC.... | ..A..CT...  | ..AA.....  | ..G...AG..  | .....T.....  | .....T..... |
| PFD1160w_exon1_Kilifi_384           | ....CG...  | ....C..ATC. | A...GC.... | ..A..CT...  | ..AA.....  | ..G...AG..  | .....T.....  | .....T..... |
| PFD1160w_exon1_Kilifi_389           | .....      | .....       | .....      | .....       | .....      | .....       | .....        | .....       |
| PFD1160w_exon1_Kilifi_406           | .....      | .....       | .....      | .....       | .....      | .....       | .....        | .....       |
| PFD1160w_exon1_Kilifi_510           | G....C.... | .....C.     | .....      | .....       | .....      | .....       | .....        | .....       |
| <i>Plasmodium reichenowi</i> _exon1 | ....CG...  | .....T...   | ..GAGCAG.. | C A.....    | .....      | ..GC...A... | .....T.....  | .....A      |







|                                     | 1770                                                        | 1780            | 1790        | 1800          | 1810            | 1820         | 1830        | 1840        |
|-------------------------------------|-------------------------------------------------------------|-----------------|-------------|---------------|-----------------|--------------|-------------|-------------|
| PFD1160w_3D7_exon1                  | ..... ..... ..... ..... ..... ..... ..... ..... ..... ..... |                 |             |               |                 |              |             |             |
|                                     | TAGAATGTTA                                                  | TCTACAAC        | TGGAATTACC  | TAATCAACAA    | GAGGTATTG       | GACTATATTC   | ACCTGTATCA  | CGAACGCTTG  |
| PFD1160w_exon1_Kilifi_017           | .....T.....                                                 | .....C.....     | .....C..... | .....G.A..... | .....AC.....    | .....        | .....A..... | .....T..... |
| PFD1160w_exon1_Kilifi_528           | .....T.....                                                 | .....CT.G.....  | .....C..... | .....         | .....           | .....        | .....       | .....T..... |
| PFD1160w_exon1_Kilifi_019           | .....                                                       | .....CT.G.....  | .....       | .....         | .....           | .....        | .....       | .....       |
| PFD1160w_exon1_Kilifi_020           | .....T.....                                                 | .....C.....     | .....C..... | .....G.A..... | .....AC.....    | .....        | .....A..... | .....T..... |
| PFD1160w_exon1_Kilifi_023           | .....T.....                                                 | .....           | .....       | .....         | .....           | .....        | .....       | .....       |
| PFD1160w_exon1_Kilifi_027           | .....T.....                                                 | .....           | .....       | .....         | .....           | .....        | .....       | .....       |
| PFD1160w_exon1_Kilifi_028           | .....                                                       | .....C.....     | .....       | .....         | .....           | .....        | .....       | .....T..... |
| PFD1160w_exon1_Kilifi_039           | .....                                                       | .....           | .....       | .....         | .....           | .....        | .....       | .....       |
| PFD1160w_exon1_Kilifi_044           | .....T.....                                                 | .....C.....     | .....C..... | .....G.A..... | .....C.....     | .....        | .....       | .....T..... |
| PFD1160w_exon1_Kilifi_045           | .....                                                       | .....           | .....       | .....         | .....           | .....        | .....       | .....       |
| PFD1160w_exon1_Kilifi_050           | .....T.....                                                 | .....C.....     | .....C..... | .....G.A..... | .....AC.....    | .....        | .....A..... | .....T..... |
| PFD1160w_exon1_Kilifi_051           | .....T.....                                                 | .....CT.G.....  | .....C..... | .....         | .....           | .....        | .....       | .....       |
| PFD1160w_exon1_Kilifi_052           | .....T.....                                                 | .....           | .....       | .....         | .....           | .....        | .....       | .....T..... |
| PFD1160w_exon1_Kilifi_057           | .....T.....                                                 | .....C.....     | .....C..... | .....G.A..... | .....AC.....    | .....        | .....A..... | .....T..... |
| PFD1160w_exon1_Kilifi_062           | .....                                                       | .....           | .....       | .....         | .....           | .....        | .....       | .....       |
| PFD1160w_exon1_Kilifi_082           | .....T.....                                                 | .....CT.G.....  | .....       | .....         | .....           | .....T.....  | .....A..... | .....T..... |
| PFD1160w_exon1_Kilifi_084           | .....                                                       | .....           | .....       | .....         | .....           | .....        | .....       | .....       |
| PFD1160w_exon1_Kilifi_093           | .....                                                       | .....           | .....       | .....         | .....           | .....        | .....       | .....       |
| PFD1160w_exon1_Kilifi_097           | .....                                                       | .....C.....     | .....T..... | .....C.....   | .....G.A.....   | .....AC..... | .....       | .....A..... |
| PFD1160w_exon1_Kilifi_105           | .....T.....                                                 | .....CT.G.....  | .....C..... | .....         | .....           | .....        | .....       | .....A..... |
| PFD1160w_exon1_Kilifi_110           | .....T.....                                                 | .....C.....     | .....C..... | .....G.A..... | .....AC.....    | .....        | .....       | .....       |
| PFD1160w_exon1_Kilifi_124           | .....                                                       | .....           | .....       | .....         | .....           | .....        | .....       | .....       |
| PFD1160w_exon1_Kilifi_150           | .....T.....                                                 | .....           | .....       | .....         | .....           | .....        | .....       | .....T..... |
| PFD1160w_exon1_Kilifi_153           | .....                                                       | .....           | .....       | .....         | .....           | .....        | .....       | .....T..... |
| PFD1160w_exon1_Kilifi_160           | .....                                                       | .....           | .....       | .....         | .....           | .....        | .....       | .....T..... |
| PFD1160w_exon1_Kilifi_162           | .....T.....                                                 | .....           | .....       | .....         | .....           | .....        | .....       | .....T..... |
| PFD1160w_exon1_Kilifi_164           | .....                                                       | .....           | .....       | .....         | .....           | .....        | .....       | .....       |
| PFD1160w_exon1_Kilifi_186           | .....T.....                                                 | .....CT.....    | .....C..... | .....G.....   | .....C.....     | .....        | .....       | .....       |
| PFD1160w_exon1_Kilifi_187           | .....                                                       | .....           | .....       | .....         | .....           | .....        | .....       | .....T..... |
| PFD1160w_exon1_Kilifi_191           | .....T.....                                                 | .....CT.G.....  | .....       | .....         | .....           | .....T.....  | .....A..... | .....T..... |
| PFD1160w_exon1_Kilifi_194           | .....T.....                                                 | .....           | .....       | .....         | .....C.....     | .....        | .....       | .....       |
| PFD1160w_exon1_Kilifi_199           | .....                                                       | .....C.....     | .....T..... | .....C.....   | .....G.A.....   | .....AC..... | .....       | .....A..... |
| PFD1160w_exon1_Kilifi_201           | .....                                                       | .....           | .....       | .....         | .....           | .....        | .....       | .....T..... |
| PFD1160w_exon1_Kilifi_202           | .....                                                       | .....C.....     | .....       | .....         | .....           | .....        | .....       | .....       |
| PFD1160w_exon1_Kilifi_214           | .....                                                       | .....           | .....       | .....         | .....           | .....        | .....       | .....       |
| PFD1160w_exon1_Kilifi_216           | .....                                                       | .....           | .....       | .....         | .....           | .....        | .....       | .....T..... |
| PFD1160w_exon1_Kilifi_229           | .....                                                       | .....           | .....       | .....         | .....           | .....        | .....       | .....T..... |
| PFD1160w_exon1_Kilifi_240           | .....                                                       | .....           | .....       | .....         | .....           | .....        | .....       | .....T..... |
| PFD1160w_exon1_Kilifi_247           | .....                                                       | .....           | .....       | .....         | .....           | .....        | .....       | .....       |
| PFD1160w_exon1_Kilifi_258           | .....T.....                                                 | .....           | .....       | .....         | .....           | .....        | .....       | .....       |
| PFD1160w_exon1_Kilifi_262           | .....T.....                                                 | .....           | .....       | .....         | .....           | .....        | .....       | .....       |
| PFD1160w_exon1_Kilifi_297           | .....                                                       | .....           | .....       | .....         | .....           | .....        | .....       | .....       |
| PFD1160w_exon1_Kilifi_298           | .....T.....                                                 | .....CT.G.....  | .....       | .....         | .....           | .....T.....  | .....A..... | .....T..... |
| PFD1160w_exon1_Kilifi_299           | .....                                                       | .....           | .....       | .....         | .....           | .....        | .....       | .....       |
| PFD1160w_exon1_Kilifi_301           | .....                                                       | .....           | .....       | .....         | .....           | .....        | .....       | .....T..... |
| PFD1160w_exon1_Kilifi_302           | .....                                                       | .....           | .....       | .....         | .....           | .....        | .....       | .....       |
| PFD1160w_exon1_Kilifi_307           | .....T.....                                                 | .....           | .....       | .....         | .....           | .....        | .....       | .....T..... |
| PFD1160w_exon1_Kilifi_311           | .....T.....                                                 | .....           | .....       | .....         | .....           | .....        | .....       | .....T..... |
| PFD1160w_exon1_Kilifi_314           | .....T.....                                                 | .....           | .....       | .....         | .....           | .....        | .....       | .....       |
| PFD1160w_exon1_Kilifi_319           | .....                                                       | .....           | .....       | .....         | .....           | .....        | .....       | .....       |
| PFD1160w_exon1_Kilifi_321           | .....                                                       | .....           | .....       | .....         | .....           | .....        | .....       | .....       |
| PFD1160w_exon1_Kilifi_322           | .....                                                       | .....           | .....       | .....         | .....           | .....        | .....       | .....       |
| PFD1160w_exon1_Kilifi_324           | .....T.....                                                 | .....CT.G.....  | .....C..... | .....         | .....           | .....        | .....       | .....       |
| PFD1160w_exon1_Kilifi_331           | .....T.....                                                 | .....C.....     | .....C..... | .....G.A..... | .....AC.....    | .....        | .....       | .....T..... |
| PFD1160w_exon1_Kilifi_336           | .....T.....                                                 | .....C.....     | .....C..... | .....G.A..... | .....AC.....    | .....        | .....A..... | .....T..... |
| PFD1160w_exon1_Kilifi_340           | .....T.....                                                 | .....           | .....       | .....         | .....           | .....        | .....       | .....T..... |
| PFD1160w_exon1_Kilifi_343           | .....T.....                                                 | .....CT.G.....  | .....C..... | .....G.....   | .....AC.....    | .....        | .....       | .....T..... |
| PFD1160w_exon1_Kilifi_344           | .....T.....                                                 | .....           | .....       | .....         | .....           | .....        | .....       | .....T..... |
| PFD1160w_exon1_Kilifi_345           | .....T.....                                                 | .....C.....     | .....       | .....         | .....C.....     | .....        | .....       | .....       |
| PFD1160w_exon1_Kilifi_348           | .....T.....                                                 | .....CT.G.....  | .....C..... | .....         | .....           | .....        | .....       | .....       |
| PFD1160w_exon1_Kilifi_349           | .....                                                       | .....           | .....       | .....         | .....           | .....        | .....       | .....       |
| PFD1160w_exon1_Kilifi_356           | .....                                                       | .....           | .....       | .....         | .....           | .....        | .....       | .....       |
| PFD1160w_exon1_Kilifi_364           | .....T.....                                                 | .....C.....     | .....C..... | .....G.A..... | .....AC.....    | .....        | .....A..... | .....T..... |
| PFD1160w_exon1_Kilifi_365           | .....T.....                                                 | .....CT.G.....  | .....C..... | .....G.....   | .....           | .....        | .....A..... | .....T..... |
| PFD1160w_exon1_Kilifi_366           | .....T.....                                                 | .....           | .....       | .....         | .....           | .....        | .....       | .....       |
| PFD1160w_exon1_Kilifi_384           | .....T.....                                                 | .....           | .....       | .....         | .....           | .....        | .....       | .....T..... |
| PFD1160w_exon1_Kilifi_389           | .....                                                       | .....           | .....       | .....         | .....           | .....        | .....       | .....T..... |
| PFD1160w_exon1_Kilifi_406           | .....                                                       | .....           | .....       | .....         | .....           | .....        | .....       | .....T..... |
| PFD1160w_exon1_Kilifi_510           | .....T.....                                                 | .....           | .....       | .....         | .....           | .....        | .....       | .....       |
| <i>Plasmodium reichenowi</i> _exon1 | .....                                                       | .....AC..G..... | .....G..... | .....G.....   | .....CC..T..... | .....T.....  | .....       | .....G..... |



|                                     | 1930       | 1940       | 1950       | 1960       | 1970        | 1980       | 1990       | 2000       |
|-------------------------------------|------------|------------|------------|------------|-------------|------------|------------|------------|
| PFD1160w_3D7_exon1                  | AGCAAACGTG | TAGAAATATC | AACTACGGTT | CAGGATCCTA | TTGGATATAG  | GACTTCCCCT | TTACAAATGA | ATGCTCATAG |
| PFD1160w_exon1_Kilifi_017           | ..TC...T.. | C.C.....   | .....      | .G..G....  | .....A      | .A...T..   | ...G.....  | ..A..A...  |
| PFD1160w_exon1_Kilifi_528           | ..TC...T.. | C.C.....   | .....      | .....G.... | .....       | .....      | .....      | .....      |
| PFD1160w_exon1_Kilifi_019           | .....      | .....      | .....      | A...G....  | .....       | .....      | .....      | .....      |
| PFD1160w_exon1_Kilifi_020           | ..TC...T.. | C.C.....   | .....A...  | .....      | .....       | .....      | .....      | .....      |
| PFD1160w_exon1_Kilifi_023           | ..TC...T.. | C.C.....   | .....      | .....G.... | .....C...   | .....      | .....      | .....      |
| PFD1160w_exon1_Kilifi_027           | ..TC...T.. | C.C.....   | .....      | .....G.... | .....C...   | .....      | .....      | .....      |
| PFD1160w_exon1_Kilifi_028           | ..C.....   | C.C.....   | .....      | .....      | .....       | .....      | .....      | .....      |
| PFD1160w_exon1_Kilifi_039           | .....      | .....      | .....      | .....      | .....       | .....      | .....      | .....      |
| PFD1160w_exon1_Kilifi_044           | ..TC...T.. | C.C.....   | .....T...  | A...G....  | .....A      | .A...T..   | ...G.....  | ..A..A...  |
| PFD1160w_exon1_Kilifi_045           | ..TC...T.. | C.C.....   | .....A...  | .....G.... | .....       | .....      | .....      | .....      |
| PFD1160w_exon1_Kilifi_050           | ..TC...T.. | C.C.....   | .....T...  | A...G....  | .....A      | .A...T..   | ...G.....  | .....      |
| PFD1160w_exon1_Kilifi_051           | ..TC...T.. | C.C.....   | .....A...  | A...G....  | .....       | .....      | .....      | .....      |
| PFD1160w_exon1_Kilifi_052           | ..TC...T.. | C.C.....   | .....A...  | .....G.... | .....C...   | .....      | .....      | .....      |
| PFD1160w_exon1_Kilifi_057           | ..TC...T.. | C.C.....   | .....A...  | .....      | .....       | .....      | .....      | .....      |
| PFD1160w_exon1_Kilifi_062           | ..TC...T.. | C.C.....   | .....      | .....G.... | .....C...   | .....      | .....      | .....      |
| PFD1160w_exon1_Kilifi_082           | ..TC...T.. | C.C.....   | .....T...  | A...G....  | .....A      | .A...T..   | ...G.....  | ..A..A...  |
| PFD1160w_exon1_Kilifi_084           | ..TC...T.. | C.C.....   | .....A...  | .....      | .....       | .....      | .....      | .....      |
| PFD1160w_exon1_Kilifi_093           | .....      | .....      | .....      | .....G.... | .....C...   | .....      | .....      | .....      |
| PFD1160w_exon1_Kilifi_097           | ..TC...T.. | C.C.....   | .....      | .....G.... | .....A      | .A...T..   | ...G.....  | ..A..A...  |
| PFD1160w_exon1_Kilifi_105           | ..TC...T.. | C.C.....   | .....A...  | .....G.... | A.....      | .....      | .....      | .....      |
| PFD1160w_exon1_Kilifi_110           | .....      | .....      | .....      | A...G....  | .....       | .....      | .....      | .....      |
| PFD1160w_exon1_Kilifi_124           | .....      | C.C.....   | .....      | .....      | .....       | .....      | .....      | .....      |
| PFD1160w_exon1_Kilifi_150           | ..TC...T.. | C.C.....   | .....A...  | .....G.... | .....A      | .A...T..   | ...G.....  | ..A..A...  |
| PFD1160w_exon1_Kilifi_153           | .....      | .....      | .....      | .....G.... | .....       | .....      | .....      | .....      |
| PFD1160w_exon1_Kilifi_160           | ..TC...T.. | C.C.....   | .....T...  | A...G....  | .....A      | .A...T..   | ...G.....  | ..A..A...  |
| PFD1160w_exon1_Kilifi_162           | ..C...T..  | C.C.....   | .....A...  | .....G.... | .....       | .....      | .....      | .....      |
| PFD1160w_exon1_Kilifi_164           | ..TC...T.. | C.C.....   | .....A...  | .....      | .....       | .....      | .....      | .....      |
| PFD1160w_exon1_Kilifi_186           | ..TC...T.. | C.C.....   | .....A...  | .....G.... | ..TC...T..  | C.C.....   | .....      | .....      |
| PFD1160w_exon1_Kilifi_187           | .....      | .....      | .....      | .....      | .....       | .....      | .....      | .....      |
| PFD1160w_exon1_Kilifi_191           | ..TC...T.. | C.C.....   | .....      | A...G....  | .....       | .....      | .....      | .....      |
| PFD1160w_exon1_Kilifi_194           | .....      | .....      | .....      | .....G.... | .....A      | .A...T..   | ...G.....  | ..A..A...  |
| PFD1160w_exon1_Kilifi_199           | ..TC...T.. | C.C.....C. | .....T...  | A...G....  | .....A      | .A...T..   | ...G.....  | ..A..A...  |
| PFD1160w_exon1_Kilifi_201           | .....      | .....      | .....      | .....      | .....       | .....      | .....      | .....      |
| PFD1160w_exon1_Kilifi_202           | ..TC...T.. | C.C.....   | .....A...  | .....G.... | .....       | .....      | .....      | .....      |
| PFD1160w_exon1_Kilifi_214           | ..TC...T.. | C.C.....   | .....      | .....G.... | .....C...   | .....      | .....      | .....      |
| PFD1160w_exon1_Kilifi_216           | ..TC...T.. | C.C.....   | .....A...  | .....G.... | .....       | .....      | .....      | .....      |
| PFD1160w_exon1_Kilifi_229           | ..C.....   | C.C.....   | .....      | .....G.... | .....       | .....      | .....      | .....      |
| PFD1160w_exon1_Kilifi_240           | .....      | .....      | .....      | .....      | .....       | .....      | .....      | .....      |
| PFD1160w_exon1_Kilifi_247           | ..TC...T.. | C.C.....   | .....A...  | .....      | .....       | .....      | .....      | .....      |
| PFD1160w_exon1_Kilifi_258           | ..C.....   | C.C.....   | .....      | .....G.... | .....       | .....      | .....      | .....      |
| PFD1160w_exon1_Kilifi_262           | ..TC...T.. | C.C.....   | .....      | .....G.... | .....       | .....      | .....      | .....      |
| PFD1160w_exon1_Kilifi_297           | .....      | .....      | .....      | .....      | .....       | .....      | .....      | .....      |
| PFD1160w_exon1_Kilifi_298           | ..TC...T.. | C.C.....   | .....T...  | A...G....  | .....       | .....      | .....      | .....      |
| PFD1160w_exon1_Kilifi_299           | ..TC...T.. | C.C.....   | .....A...  | .....      | .....       | .....      | .....      | .....      |
| PFD1160w_exon1_Kilifi_301           | ..TC...T.. | C.C.....   | .....A...  | .....G.... | .....       | .....      | .....      | .....      |
| PFD1160w_exon1_Kilifi_302           | .....      | .....      | .....      | .....      | .....       | .....      | .....      | .....      |
| PFD1160w_exon1_Kilifi_307           | ..TC...T.. | C.C.....   | .....A...  | .....G.... | .....       | .....      | .....      | .....      |
| PFD1160w_exon1_Kilifi_311           | ..TC...T.. | C.C.....   | .....A...  | .....G.... | .....       | .....      | .....      | .....      |
| PFD1160w_exon1_Kilifi_314           | ..TC...T.. | C.C.....   | .....      | .....G.... | .....       | .....      | .....      | .....      |
| PFD1160w_exon1_Kilifi_319           | ..TC...T.. | C.C.....   | .....      | .....G.... | .....C...   | .....      | .....      | .....      |
| PFD1160w_exon1_Kilifi_321           | ..TC...T.. | C.C.....   | .....A...  | .....      | .....       | .....      | .....      | .....      |
| PFD1160w_exon1_Kilifi_322           | ..C...T..  | C.C.....   | .....      | .....G.... | .....       | .....      | .....      | .....      |
| PFD1160w_exon1_Kilifi_324           | ..TC...T.. | C.C.....   | .....A...  | A...G....  | .....       | .....      | .....      | .....      |
| PFD1160w_exon1_Kilifi_331           | ..TC...T.. | C.C.....   | .....A...  | .....      | .....       | .....      | .....      | .....      |
| PFD1160w_exon1_Kilifi_336           | ..TC...T.. | C.C.....   | .....A...  | .....      | .....       | .....      | .....      | .....      |
| PFD1160w_exon1_Kilifi_340           | ..TC...T.. | C.C.....   | .....A...  | .....G.... | .....A      | .A...T..   | ...G.....  | .....      |
| PFD1160w_exon1_Kilifi_343           | ..TC...T.. | C.C.....   | .....A...  | .....G.... | .....C...   | .....      | .....      | .....      |
| PFD1160w_exon1_Kilifi_344           | ..TC...T.. | C.C.....   | .....A...  | .....G.... | .....A      | .A...T..   | ...G.....  | .....      |
| PFD1160w_exon1_Kilifi_345           | .....      | .....      | .....      | .....G.... | .....A      | .A...T..   | ...G.....  | ..A..A...  |
| PFD1160w_exon1_Kilifi_348           | ..TC...T.. | C.C.....   | .....A...  | A...G....  | .....       | .....      | .....      | .....      |
| PFD1160w_exon1_Kilifi_349           | ..TC...T.. | C.C.....   | .....      | .....G.... | .....C...   | .....      | .....      | .....      |
| PFD1160w_exon1_Kilifi_356           | ..TC...T.. | C.C.....   | .....      | .....G.... | .....C...   | .....      | .....      | .....      |
| PFD1160w_exon1_Kilifi_364           | .....      | .....      | .....      | .....      | .....       | .....      | .....      | .....      |
| PFD1160w_exon1_Kilifi_365           | ..TC...T.. | C.C.....   | .....      | .....G.... | .....       | .....      | .....      | .....      |
| PFD1160w_exon1_Kilifi_366           | ..C.....   | C.C.....   | .....      | .....G.... | .....       | .....      | .....      | .....      |
| PFD1160w_exon1_Kilifi_384           | ..TC...T.. | C.C.....   | .....A...  | .....G.... | .....       | .....      | .....      | .....      |
| PFD1160w_exon1_Kilifi_389           | ..TC...T.. | C.C.....   | .....A...  | .....G.... | .....       | .....      | .....      | .....      |
| PFD1160w_exon1_Kilifi_406           | .....      | .....      | .....      | .....G.... | .....       | .....      | .....      | .....      |
| PFD1160w_exon1_Kilifi_510           | .....      | .....      | .....      | A...G....  | .....       | .....      | .....      | .....      |
| <i>Plasmodium reichenowi</i> _exon1 | .ATG..GC.  | C.C.....   | .....GT..C | A...G....  | .....A...G. | ..G...T..  | .....G...  | G..A.A...  |

|                                     | 2010       | 2020       | 2030       | 2040       | 2050       | 2060       | 2070       | 2080          |
|-------------------------------------|------------|------------|------------|------------|------------|------------|------------|---------------|
| PFD1160w_3D7_exon1                  | CGTTGGTGCT | GGTATTAATG | TATCCTCAAT | ATTATCAATG | TTAGGTTTGT | CTAGTGGACA | AGTTCGAAGA | AGTGGTGGGC    |
| PFD1160w_exon1_Kilifi_017           | T          |            | C.C.T      |            | T          |            | A          | A.T           |
| PFD1160w_exon1_Kilifi_528           |            |            | C.C.T      |            | T          |            | A          | A.T           |
| PFD1160w_exon1_Kilifi_019           | T          |            | C.C.T      |            | T          |            | A          | A.T           |
| PFD1160w_exon1_Kilifi_020           |            |            |            |            |            |            |            |               |
| PFD1160w_exon1_Kilifi_023           |            |            |            |            |            |            |            |               |
| PFD1160w_exon1_Kilifi_027           |            |            |            |            |            |            |            |               |
| PFD1160w_exon1_Kilifi_028           |            |            |            |            |            |            |            |               |
| PFD1160w_exon1_Kilifi_039           |            |            |            |            |            |            |            |               |
| PFD1160w_exon1_Kilifi_044           | T          |            | C.C.T      |            | T          |            | A          | A.T           |
| PFD1160w_exon1_Kilifi_045           |            |            | G          |            |            |            |            |               |
| PFD1160w_exon1_Kilifi_050           |            |            | G          | G          |            |            |            | A.T           |
| PFD1160w_exon1_Kilifi_051           |            |            |            |            |            |            |            |               |
| PFD1160w_exon1_Kilifi_052           |            |            |            |            |            |            |            |               |
| PFD1160w_exon1_Kilifi_057           |            |            |            |            |            |            |            |               |
| PFD1160w_exon1_Kilifi_062           |            |            |            |            |            |            |            |               |
| PFD1160w_exon1_Kilifi_082           | T          |            | C.C.T..G   |            | T          |            | A          | A.T           |
| PFD1160w_exon1_Kilifi_084           |            |            | G          |            |            |            |            |               |
| PFD1160w_exon1_Kilifi_093           |            |            |            |            |            |            |            |               |
| PFD1160w_exon1_Kilifi_097           | T          |            | C.C.T      |            | T          |            | A          | A.T           |
| PFD1160w_exon1_Kilifi_105           |            |            |            |            |            |            |            |               |
| PFD1160w_exon1_Kilifi_110           | T          |            | C.C.T      |            | T          |            | A          | A.T           |
| PFD1160w_exon1_Kilifi_124           |            |            | C          |            |            |            |            |               |
| PFD1160w_exon1_Kilifi_150           | T          |            | C.C.T      |            |            |            |            |               |
| PFD1160w_exon1_Kilifi_153           |            |            |            |            |            |            |            |               |
| PFD1160w_exon1_Kilifi_160           | T          |            |            |            | T          |            |            |               |
| PFD1160w_exon1_Kilifi_162           |            |            | G          |            |            |            |            |               |
| PFD1160w_exon1_Kilifi_164           |            |            | G          |            |            |            |            |               |
| PFD1160w_exon1_Kilifi_186           |            |            | G          |            |            |            |            |               |
| PFD1160w_exon1_Kilifi_187           |            |            |            |            |            |            |            |               |
| PFD1160w_exon1_Kilifi_191           |            |            | G          |            |            |            |            |               |
| PFD1160w_exon1_Kilifi_194           | T          | T          | G          | G          |            |            |            | A.T           |
| PFD1160w_exon1_Kilifi_199           | T          |            | C.C.T      |            | T          |            | A          | A.T           |
| PFD1160w_exon1_Kilifi_201           |            |            |            |            |            |            |            |               |
| PFD1160w_exon1_Kilifi_202           |            |            | G          |            |            |            |            |               |
| PFD1160w_exon1_Kilifi_214           |            |            |            |            |            |            |            |               |
| PFD1160w_exon1_Kilifi_216           |            | A          |            |            |            |            |            |               |
| PFD1160w_exon1_Kilifi_229           |            |            |            |            |            |            |            |               |
| PFD1160w_exon1_Kilifi_240           |            |            |            |            |            |            |            |               |
| PFD1160w_exon1_Kilifi_247           |            |            | G          |            |            |            |            |               |
| PFD1160w_exon1_Kilifi_258           |            |            |            |            |            |            |            |               |
| PFD1160w_exon1_Kilifi_262           |            |            |            |            |            |            |            |               |
| PFD1160w_exon1_Kilifi_297           |            |            | C.C        |            |            |            |            |               |
| PFD1160w_exon1_Kilifi_298           |            |            | G          |            |            |            | A          | A.T           |
| PFD1160w_exon1_Kilifi_299           |            |            | G          |            |            |            |            |               |
| PFD1160w_exon1_Kilifi_301           |            |            |            |            |            |            |            |               |
| PFD1160w_exon1_Kilifi_302           |            |            |            |            |            |            |            |               |
| PFD1160w_exon1_Kilifi_307           |            |            |            |            |            |            |            |               |
| PFD1160w_exon1_Kilifi_311           |            |            |            |            |            |            |            |               |
| PFD1160w_exon1_Kilifi_314           |            |            |            |            |            |            |            |               |
| PFD1160w_exon1_Kilifi_319           |            |            |            |            |            |            |            |               |
| PFD1160w_exon1_Kilifi_321           |            |            | G          |            |            |            |            |               |
| PFD1160w_exon1_Kilifi_322           |            |            | C.C        |            |            |            |            |               |
| PFD1160w_exon1_Kilifi_324           |            |            |            |            |            |            |            |               |
| PFD1160w_exon1_Kilifi_331           |            |            |            |            |            |            |            |               |
| PFD1160w_exon1_Kilifi_336           |            |            |            |            |            |            |            |               |
| PFD1160w_exon1_Kilifi_340           |            |            |            |            | T          |            |            |               |
| PFD1160w_exon1_Kilifi_343           |            |            | C          |            |            |            |            |               |
| PFD1160w_exon1_Kilifi_344           |            |            |            |            | T          |            |            |               |
| PFD1160w_exon1_Kilifi_345           | T          | T          | G          | G          |            |            |            | A.T           |
| PFD1160w_exon1_Kilifi_348           |            |            |            |            |            |            |            |               |
| PFD1160w_exon1_Kilifi_349           |            |            |            |            |            |            |            |               |
| PFD1160w_exon1_Kilifi_356           |            |            |            |            |            |            |            |               |
| PFD1160w_exon1_Kilifi_364           |            | T          |            |            |            |            |            |               |
| PFD1160w_exon1_Kilifi_365           |            |            |            |            |            |            |            |               |
| PFD1160w_exon1_Kilifi_366           |            |            | G          | G          |            |            |            |               |
| PFD1160w_exon1_Kilifi_384           |            |            |            |            |            |            |            |               |
| PFD1160w_exon1_Kilifi_389           |            |            | C          |            |            |            |            |               |
| PFD1160w_exon1_Kilifi_406           |            |            |            |            |            |            |            |               |
| PFD1160w_exon1_Kilifi_510           | T          |            | C.C.T      |            | T          |            | A          | A.T           |
| <i>Plasmodium reichenowi</i> _exon1 | T..A..T..  |            | ..C.....   | ..T..G..   |            | ..A..C     | ..A..A..   | ..A..AAA..AA. |







2250 2260 2270 2280 2290  
.....|.....|.....|.....|.....|.....|..  
AGTGCATTA GTAACATTG TATTCTTTT TATGTTTTG GTATTTAATA AG

PFD1160w\_3D7\_exon1  
PFD1160w\_exon1\_Kilifi\_017  
PFD1160w\_exon1\_Kilifi\_528  
PFD1160w\_exon1\_Kilifi\_019  
PFD1160w\_exon1\_Kilifi\_020  
PFD1160w\_exon1\_Kilifi\_023  
PFD1160w\_exon1\_Kilifi\_027  
PFD1160w\_exon1\_Kilifi\_028  
PFD1160w\_exon1\_Kilifi\_039  
PFD1160w\_exon1\_Kilifi\_044  
PFD1160w\_exon1\_Kilifi\_045  
PFD1160w\_exon1\_Kilifi\_050  
PFD1160w\_exon1\_Kilifi\_051  
PFD1160w\_exon1\_Kilifi\_052  
PFD1160w\_exon1\_Kilifi\_057  
PFD1160w\_exon1\_Kilifi\_062  
PFD1160w\_exon1\_Kilifi\_082  
PFD1160w\_exon1\_Kilifi\_084  
PFD1160w\_exon1\_Kilifi\_093  
PFD1160w\_exon1\_Kilifi\_097  
PFD1160w\_exon1\_Kilifi\_105  
PFD1160w\_exon1\_Kilifi\_110  
PFD1160w\_exon1\_Kilifi\_124  
PFD1160w\_exon1\_Kilifi\_150  
PFD1160w\_exon1\_Kilifi\_153  
PFD1160w\_exon1\_Kilifi\_160  
PFD1160w\_exon1\_Kilifi\_162  
PFD1160w\_exon1\_Kilifi\_164  
PFD1160w\_exon1\_Kilifi\_186  
PFD1160w\_exon1\_Kilifi\_187  
PFD1160w\_exon1\_Kilifi\_191  
PFD1160w\_exon1\_Kilifi\_194  
PFD1160w\_exon1\_Kilifi\_199  
PFD1160w\_exon1\_Kilifi\_201  
PFD1160w\_exon1\_Kilifi\_202  
PFD1160w\_exon1\_Kilifi\_214  
PFD1160w\_exon1\_Kilifi\_216  
PFD1160w\_exon1\_Kilifi\_229  
PFD1160w\_exon1\_Kilifi\_240  
PFD1160w\_exon1\_Kilifi\_247  
PFD1160w\_exon1\_Kilifi\_258  
PFD1160w\_exon1\_Kilifi\_262  
PFD1160w\_exon1\_Kilifi\_297  
PFD1160w\_exon1\_Kilifi\_298  
PFD1160w\_exon1\_Kilifi\_299  
PFD1160w\_exon1\_Kilifi\_301  
PFD1160w\_exon1\_Kilifi\_302  
PFD1160w\_exon1\_Kilifi\_307  
PFD1160w\_exon1\_Kilifi\_311  
PFD1160w\_exon1\_Kilifi\_314  
PFD1160w\_exon1\_Kilifi\_319  
PFD1160w\_exon1\_Kilifi\_321  
PFD1160w\_exon1\_Kilifi\_322  
PFD1160w\_exon1\_Kilifi\_324  
PFD1160w\_exon1\_Kilifi\_331  
PFD1160w\_exon1\_Kilifi\_336  
PFD1160w\_exon1\_Kilifi\_340  
PFD1160w\_exon1\_Kilifi\_343  
PFD1160w\_exon1\_Kilifi\_344  
PFD1160w\_exon1\_Kilifi\_345  
PFD1160w\_exon1\_Kilifi\_348  
PFD1160w\_exon1\_Kilifi\_349  
PFD1160w\_exon1\_Kilifi\_356  
PFD1160w\_exon1\_Kilifi\_364  
PFD1160w\_exon1\_Kilifi\_365  
PFD1160w\_exon1\_Kilifi\_366  
PFD1160w\_exon1\_Kilifi\_384  
PFD1160w\_exon1\_Kilifi\_389  
PFD1160w\_exon1\_Kilifi\_406  
PFD1160w\_exon1\_Kilifi\_510  
*Plasmodium reichenowi*\_exon1

Supplementary Figure 2c

```
10      20      30      40      50      60      70      80
.....|.....|.....|.....|.....|.....|.....|.....|
PF07_0004_3D7_exon2
PF07_0004_exon2_Kilifi_311
PF07_0004_exon2_Kilifi_314
PF07_0004_exon2_Kilifi_319
PF07_0004_exon2_Kilifi_321
PF07_0004_exon2_Kilifi_322
PF07_0004_exon2_Kilifi_323
PF07_0004_exon2_Kilifi_258
PF07_0004_exon2_Kilifi_290
PF07_0004_exon2_Kilifi_297
PF07_0004_exon2_Kilifi_299
PF07_0004_exon2_Kilifi_301
PF07_0004_exon2_Kilifi_302
PF07_0004_exon2_Kilifi_310
PF07_0004_exon2_Kilifi_019
PF07_0004_exon2_Kilifi_044
PF07_0004_exon2_Kilifi_093
PF07_0004_exon2_Kilifi_097
PF07_0004_exon2_Kilifi_201
PF07_0004_exon2_Kilifi_235
PF07_0004_exon2_Kilifi_245
PF07_0004_exon2_Kilifi_027
PF07_0004_exon2_Kilifi_028
PF07_0004_exon2_Kilifi_050
PF07_0004_exon2_Kilifi_052
PF07_0004_exon2_Kilifi_062
PF07_0004_exon2_Kilifi_082
PF07_0004_exon2_Kilifi_091
PF07_0004_exon2_Kilifi_105
PF07_0004_exon2_Kilifi_110
PF07_0004_exon2_Kilifi_160
PF07_0004_exon2_Kilifi_164
PF07_0004_exon2_Kilifi_199
PF07_0004_exon2_Kilifi_202
PF07_0004_exon2_Kilifi_247
PF07_0004_exon2_Kilifi_249
PF07_0004_exon2_Kilifi_333
PF07_0004_exon2_Kilifi_334
PF07_0004_exon2_Kilifi_340
PF07_0004_exon2_Kilifi_343
PF07_0004_exon2_Kilifi_344
PF07_0004_exon2_Kilifi_345
PF07_0004_exon2_Kilifi_349
PF07_0004_exon2_Kilifi_356
PF07_0004_exon2_Kilifi_364
PF07_0004_exon2_Kilifi_328
PF07_0004_exon2_Kilifi_365
PF07_0004_exon2_Kilifi_384
PF07_0004_exon2_Kilifi_389
PF07_0004_exon2_Kilifi_406
PF07_0004_exon2_Kilifi_510
PF07_0004_exon2_Kilifi_366
PF07_0004_exon2_Kilifi_023
PF07_0004_exon2_Kilifi_057
PF07_0004_exon2_Kilifi_191
PF07_0004_exon2_Kilifi_194
PF07_0004_exon2_Kilifi_250
PF07_0004_exon2_Kilifi_289
PF07_0004_exon2_Kilifi_328
PF07_0004_exon2_Kilifi_348
Plasmodium reichenowi
```

















|                              | 650         | 660         | 670         | 680          | 690         | 700         | 710         | 720         |
|------------------------------|-------------|-------------|-------------|--------------|-------------|-------------|-------------|-------------|
| PF07_0004_3D7_exon2          | ACAAAAGGAA  | ATAGATCCAT  | TAAAAAATAA  | -TGAAATAAA   | ATCTTACGAT  | CCTTTTAAAA  | GGGACACAAT  | TAAAGCGCAA  |
| PF07_0004_exon2_Kilifi_311   | .....       | .....A..... | .....       | -.....       | .....       | .....       | .....       | .....       |
| PF07_0004_exon2_Kilifi_314   | .....       | .....A..... | .....       | -.....       | .....       | .....       | .....       | .....       |
| PF07_0004_exon2_Kilifi_319   | .....       | .....A..... | .....       | -.....       | .....       | .....       | .....       | .....       |
| PF07_0004_exon2_Kilifi_321   | .....       | .....A..... | .....       | -.....       | .....       | .....       | .....       | .....       |
| PF07_0004_exon2_Kilifi_322   | .....       | .....A..... | .....       | -.....       | .....       | .....       | .....       | .....       |
| PF07_0004_exon2_Kilifi_323   | .....       | .....A..... | .....       | -.....       | .....       | .....       | .....       | .....       |
| PF07_0004_exon2_Kilifi_258   | .....       | .....A..... | .....       | -.....       | .....       | .....       | .....       | .....       |
| PF07_0004_exon2_Kilifi_290   | .....       | .....C..... | .....       | -.....       | .....       | .....       | .....       | .....       |
| PF07_0004_exon2_Kilifi_297   | .....       | .....A..... | .....       | -.....       | .....       | .....       | .....       | .....       |
| PF07_0004_exon2_Kilifi_299   | .....       | .....A..... | .....       | -.....       | .....       | .....       | .....       | .....       |
| PF07_0004_exon2_Kilifi_301   | .....       | .....A..... | .....       | -.....       | .....       | .....       | .....       | .....       |
| PF07_0004_exon2_Kilifi_302   | .....       | .....A..... | .....       | -.....       | .....       | .....       | .....       | .....       |
| PF07_0004_exon2_Kilifi_310   | .....       | .....A..... | .....       | -.....       | .....       | .....       | .....       | .....       |
| PF07_0004_exon2_Kilifi_019   | .....       | .....A..... | .....       | -.....       | .....       | .....       | .....       | .....       |
| PF07_0004_exon2_Kilifi_044   | .....       | .....A..... | .....       | -.....       | .....       | .....       | .....       | .....       |
| PF07_0004_exon2_Kilifi_093   | .....       | .....A..... | .....       | -.....       | .....       | .....       | .....       | .....       |
| PF07_0004_exon2_Kilifi_097   | .....       | .....A..... | .....       | -.....       | .....       | .....       | .....       | .....       |
| PF07_0004_exon2_Kilifi_201   | .....       | .....A..... | .....       | -.....       | .....       | .....       | .....       | .....       |
| PF07_0004_exon2_Kilifi_235   | .....       | .....A..... | .....       | -.....       | .....       | .....       | .....       | .....       |
| PF07_0004_exon2_Kilifi_245   | .....       | .....A..... | .....       | -.....       | .....       | .....       | .....       | .....       |
| PF07_0004_exon2_Kilifi_027   | .....       | .....A..... | .....       | -.....       | .....       | .....       | .....       | .....       |
| PF07_0004_exon2_Kilifi_028   | .....       | .....A..... | .....       | -.....       | .....       | .....       | .....       | .....       |
| PF07_0004_exon2_Kilifi_050   | .....       | .....A..... | .....       | -.....       | .....       | .....C..... | .....       | .....       |
| PF07_0004_exon2_Kilifi_052   | .....       | .....A..... | .....       | -.....       | .....       | .....       | .....       | .....       |
| PF07_0004_exon2_Kilifi_062   | .....       | .....A..... | .....       | -.....       | .....       | .....       | .....       | .....       |
| PF07_0004_exon2_Kilifi_082   | .....       | .....A..... | .....       | -.....       | .....       | .....       | .....       | .....       |
| PF07_0004_exon2_Kilifi_091   | .....       | .....A..... | .....       | -.....       | .....       | .....       | .....       | .....       |
| PF07_0004_exon2_Kilifi_105   | .....       | .....A..... | .....       | -.....       | .....       | .....       | .....       | .....       |
| PF07_0004_exon2_Kilifi_110   | .....       | .....A..... | .....       | -.....       | .....       | .....       | .....       | .....       |
| PF07_0004_exon2_Kilifi_160   | .....       | .....A..... | .....       | -.....       | .....       | .....       | .....       | .....       |
| PF07_0004_exon2_Kilifi_164   | .....       | .....A..... | .....       | -.....       | .....       | .....       | .....       | .....       |
| PF07_0004_exon2_Kilifi_199   | .....       | .....A..... | .....       | -.....       | .....       | .....       | .....       | .....       |
| PF07_0004_exon2_Kilifi_202   | .....       | .....A..... | .....       | -.....       | .....       | .....       | .....       | .....       |
| PF07_0004_exon2_Kilifi_247   | .....       | .....A..... | .....       | -.....       | .....       | .....       | .....       | .....       |
| PF07_0004_exon2_Kilifi_249   | .....       | .....A..... | .....       | -.....       | .....       | .....       | .....       | .....       |
| PF07_0004_exon2_Kilifi_333   | .....       | .....A..... | .....       | -.....       | .....       | .....       | .....       | .....       |
| PF07_0004_exon2_Kilifi_334   | .....       | .....A..... | .....       | -.....       | .....       | .....       | .....       | .....       |
| PF07_0004_exon2_Kilifi_340   | .....       | .....A..... | .....       | -.....       | .....       | .....       | .....       | .....       |
| PF07_0004_exon2_Kilifi_343   | .....       | .....A..... | .....       | -.....       | .....       | .....       | .....       | .....       |
| PF07_0004_exon2_Kilifi_344   | .....       | .....A..... | .....       | -.....       | .....       | .....       | .....       | .....       |
| PF07_0004_exon2_Kilifi_345   | .....       | .....A..... | .....       | -.....       | .....       | .....       | .....       | .....       |
| PF07_0004_exon2_Kilifi_349   | .....       | .....A..... | .....       | -.....       | .....       | .....       | .....       | .....       |
| PF07_0004_exon2_Kilifi_356   | .....       | .....A..... | .....       | -.....       | .....       | .....       | .....       | .....       |
| PF07_0004_exon2_Kilifi_364   | .....       | .....A..... | .....       | -.....       | .....       | .....       | .....       | .....       |
| PF07_0004_exon2_Kilifi_328   | .....       | .....A..... | .....       | -.....       | .....       | .....       | .....       | .....       |
| PF07_0004_exon2_Kilifi_365   | .....       | .....A..... | .....       | -.....       | .....       | .....       | .....       | .....       |
| PF07_0004_exon2_Kilifi_384   | .....       | .....A..... | .....       | -.....       | .....       | .....       | .....       | .....       |
| PF07_0004_exon2_Kilifi_389   | .....       | .....A..... | .....       | -.....       | .....       | .....       | .....       | .....       |
| PF07_0004_exon2_Kilifi_406   | .....       | .....A..... | .....       | -.....       | .....       | .....       | .....       | .....       |
| PF07_0004_exon2_Kilifi_510   | .....       | .....A..... | .....       | -.....       | .....       | .....       | .....       | .....       |
| PF07_0004_exon2_Kilifi_366   | .....       | .....A..... | .....       | -.....       | .....       | .....       | .....       | .....       |
| PF07_0004_exon2_Kilifi_023   | .....       | .....A..... | .....       | -.....       | .....       | .....       | .....       | .....       |
| PF07_0004_exon2_Kilifi_057   | .....       | .....A..... | .....       | -.....       | .....       | .....       | .....       | .....       |
| PF07_0004_exon2_Kilifi_191   | .....       | .....A..... | .....       | -.....       | .....       | .....       | .....       | .....       |
| PF07_0004_exon2_Kilifi_194   | .....       | .....A..... | .....       | -.....       | .....       | .....       | .....       | .....       |
| PF07_0004_exon2_Kilifi_250   | .....       | .....A..... | .....       | -.....       | .....       | .....       | .....       | .....       |
| PF07_0004_exon2_Kilifi_289   | .....       | .....A..... | .....       | -.....       | .....       | .....       | .....       | .....       |
| PF07_0004_exon2_Kilifi_328   | .....       | .....A..... | .....       | -.....       | .....       | .....       | .....       | .....       |
| PF07_0004_exon2_Kilifi_348   | .....       | .....A..... | .....       | -.....       | .....       | .....       | .....       | .....       |
| <i>Plasmodium reichenowi</i> | .....G..... | .....C..... | .....T..... | A.....T..... | .....T..... | .....T..... | .....T.TG.. | .....C.AG.. |

|                              | 730             | 740          | 750        | 760        | 770         | 780         | 790         | 800        |
|------------------------------|-----------------|--------------|------------|------------|-------------|-------------|-------------|------------|
| PF07_0004_3D7_exon2          | GATAATTTAA      | ATGGAAACGA   | AAGAAAAGCA | TATGATCCTT | TTAAAAAGGA  | TATGGTTAAA  | CCAGAAGATA  | ATTTAAGAAA |
| PF07_0004_exon2_Kilifi_311   | .A.....         | .....GT...   | .....A.    | .....      | .....       | .....       | .....       | .....      |
| PF07_0004_exon2_Kilifi_314   | .A.....         | .....GT...   | .....A.    | .....      | .....       | .....       | .....       | .....      |
| PF07_0004_exon2_Kilifi_319   | .A.....         | .....GT...   | .....T.    | .....      | .....G...   | ..G.AAC.C.. | ..GC.....   | .....G     |
| PF07_0004_exon2_Kilifi_321   | .A.....         | .....GT...   | .....A.    | .....      | .....       | .....       | .....       | .....      |
| PF07_0004_exon2_Kilifi_322   | .A.....         | .....GT...   | .....A.    | .....      | .....       | .....       | .....       | .....      |
| PF07_0004_exon2_Kilifi_323   | .A.....T.       | .....GT...   | .....A.    | .....      | .....       | .....       | .....       | .....      |
| PF07_0004_exon2_Kilifi_258   | .....           | .....        | .....      | .....      | .....       | .....       | .....       | .....      |
| PF07_0004_exon2_Kilifi_290   | .A.....         | .....GT...   | .....A.    | .....      | .....       | .....       | .....       | .....      |
| PF07_0004_exon2_Kilifi_297   | .A.....         | .....GT...   | .....A.    | .....      | .....       | .....       | .....       | .....      |
| PF07_0004_exon2_Kilifi_299   | .A.....         | .....GT...   | .....A.    | .....      | .....       | .....       | .....       | .....      |
| PF07_0004_exon2_Kilifi_301   | .....T.         | .....GT...   | .....A.    | .....      | .....       | .....       | .....       | .....      |
| PF07_0004_exon2_Kilifi_302   | .A.....         | .....GT...   | .....A.    | .....      | .....       | .....T..... | .....       | .....      |
| PF07_0004_exon2_Kilifi_310   | .....           | .....        | .....      | .....      | .....       | .....       | .....       | .....      |
| PF07_0004_exon2_Kilifi_019   | .....           | .....        | .....      | .....      | .....       | .....       | .....       | .....      |
| PF07_0004_exon2_Kilifi_044   | .A.....         | .....GT...   | .....A.    | .....      | .....       | .....       | .....       | .....      |
| PF07_0004_exon2_Kilifi_093   | .....           | .....        | .....      | .....      | .....       | .....       | .....       | .....      |
| PF07_0004_exon2_Kilifi_097   | .A.....         | .....GT...   | .....A.    | .....      | .....       | .....       | .....       | .....      |
| PF07_0004_exon2_Kilifi_201   | .A.....         | .....GT...   | .....A.    | .....      | .....       | .....       | .....       | .....      |
| PF07_0004_exon2_Kilifi_235   | .A.....         | ..A..GTA..   | .....A.    | .....      | .....       | .....C..... | .....C..... | .....      |
| PF07_0004_exon2_Kilifi_245   | .A.....         | .....GT...   | .....A.    | .....      | .....       | .....       | .....       | .....      |
| PF07_0004_exon2_Kilifi_027   | .....           | .....        | .....      | .....      | .....       | .....       | .....       | .....      |
| PF07_0004_exon2_Kilifi_028   | .A.....         | .....GT...   | .....A.    | .....      | .....       | .....       | .....       | .....      |
| PF07_0004_exon2_Kilifi_050   | .....           | .....        | .....      | .....      | .....       | .....       | .....       | .....      |
| PF07_0004_exon2_Kilifi_052   | .A.....         | .....GT...   | .....A.    | .....      | .....       | .....       | .....       | .....      |
| PF07_0004_exon2_Kilifi_062   | .A.....         | .....GT...   | .....A.    | .....      | .....       | .....       | .....       | .....      |
| PF07_0004_exon2_Kilifi_082   | .....           | .....        | .....      | .....      | .....       | .....       | .....       | .....      |
| PF07_0004_exon2_Kilifi_091   | .A.....         | .....GT...   | .....A.    | .....      | .....       | .....       | .....       | .....      |
| PF07_0004_exon2_Kilifi_105   | .A.....         | .....GT...   | .....A.    | .....      | .....       | .....       | .....       | .....      |
| PF07_0004_exon2_Kilifi_110   | .A.....         | .....GT...   | .....A.    | .....      | .....       | .....       | .....       | .....      |
| PF07_0004_exon2_Kilifi_160   | .....           | .....        | .....      | .....      | .....       | .....       | .....       | .....      |
| PF07_0004_exon2_Kilifi_164   | .A.....         | .....GT...   | .....A.    | .....      | .....       | .....       | .....       | .....      |
| PF07_0004_exon2_Kilifi_199   | .A.....         | .....GT...   | .....A.    | .....      | .....       | .....       | .....       | .....      |
| PF07_0004_exon2_Kilifi_202   | .....           | .....        | .....      | .....      | .....       | .....       | .....       | .....      |
| PF07_0004_exon2_Kilifi_247   | .....           | .....        | .....      | .....      | .....       | .....       | .....       | .....      |
| PF07_0004_exon2_Kilifi_249   | .....           | .....        | .....      | .....      | .....       | .....       | .....       | .....      |
| PF07_0004_exon2_Kilifi_333   | .....           | .....        | .....      | .....      | .....       | .....       | .....       | .....      |
| PF07_0004_exon2_Kilifi_334   | .A.....         | .....GT...   | .....A.    | .....      | .....       | .....       | .....       | .....      |
| PF07_0004_exon2_Kilifi_340   | .A.....         | .....GT...   | .....A.    | .....      | .....       | .....       | .....       | .....      |
| PF07_0004_exon2_Kilifi_343   | .....           | .....        | .....      | .....      | .....       | .....       | .....       | .....      |
| PF07_0004_exon2_Kilifi_344   | .A.....         | .....GT...   | .....A.    | .....      | .....       | .....       | .....       | .....      |
| PF07_0004_exon2_Kilifi_345   | .....           | .....        | .....      | .....      | .....       | .....       | .....       | .....G     |
| PF07_0004_exon2_Kilifi_349   | .....           | .....        | .....      | .....      | .....       | .....       | .....       | .....      |
| PF07_0004_exon2_Kilifi_356   | .....           | .....        | .....      | .....      | .....       | .....       | .....       | .....      |
| PF07_0004_exon2_Kilifi_364   | .....           | .....        | .....      | .....      | .....       | .....       | .....       | .....      |
| PF07_0004_exon2_Kilifi_328   | .....           | .....        | .....      | .....      | .....       | .....       | .....       | .....      |
| PF07_0004_exon2_Kilifi_365   | .A.....         | .....GT...   | .....A.    | .....      | .....       | .....       | .....       | .....      |
| PF07_0004_exon2_Kilifi_384   | .....           | .....        | .....      | .....      | .....       | .....       | .....       | .....      |
| PF07_0004_exon2_Kilifi_389   | .A.....         | .....GT...   | .....A.    | .....      | .....       | .....       | .....       | .....      |
| PF07_0004_exon2_Kilifi_406   | .....           | .....        | .....      | .....      | .....       | .....       | .....       | .....      |
| PF07_0004_exon2_Kilifi_510   | .....           | .....        | .....      | .....      | .....       | .....       | .....       | .....      |
| PF07_0004_exon2_Kilifi_366   | .....           | .....        | .....      | .....      | .....       | .....       | .....       | .....      |
| PF07_0004_exon2_Kilifi_023   | .....           | .....        | .....      | .....      | .....       | .....       | .....       | .....      |
| PF07_0004_exon2_Kilifi_057   | .....           | .....        | .....      | .....      | .....       | .....       | .....       | .....      |
| PF07_0004_exon2_Kilifi_191   | .A.....         | .....GT...   | .....A.    | .....      | .....       | .....       | .....       | .....      |
| PF07_0004_exon2_Kilifi_194   | .A.....         | .....GT...   | .....A.    | .....      | .....       | .....       | .....       | .....      |
| PF07_0004_exon2_Kilifi_250   | .A.....         | .....GT...   | .....A.    | .....      | .....       | .....       | .....       | .....      |
| PF07_0004_exon2_Kilifi_289   | .A.....         | .....GT...   | .....A.    | .....      | .....       | .....       | .....       | .....      |
| PF07_0004_exon2_Kilifi_328   | .....           | .....        | .....      | .....      | .....       | .....       | .....       | .....      |
| PF07_0004_exon2_Kilifi_348   | .A.....         | .....GT...   | .....A.    | .....      | .....       | .....       | .....       | .....G     |
| <i>Plasmodium reichenowi</i> | .....GAA.GG.A.. | .....T...T.. | .....      | .....G...  | .....A..... | .....G..... | .....       | .....G     |



|                              | 890        | 900        | 910         | 920        | 930        | 940        | 950        | 960        |
|------------------------------|------------|------------|-------------|------------|------------|------------|------------|------------|
| PF07_0004_3D7_exon2          | CATATGATAC | TTTAAAAAGA | AATGTAACAC  | AAATGCAAGA | TAATTTAAAA | AGGGAAGAAA | GAAAACCATA | TGATCCTTTA |
| PF07_0004_exon2_Kilifi_311   | -----      | -----      | .....C.     | .....      | .....      | .....      | .....      | .....      |
| PF07_0004_exon2_Kilifi_314   | -----      | -----      | .....C.     | .....      | .....      | .....      | .....      | .....      |
| PF07_0004_exon2_Kilifi_319   | .....C.    | .....      | .....       | .....      | .....      | .....      | .....      | .....      |
| PF07_0004_exon2_Kilifi_321   | -----      | -----      | .....C.     | .....      | .....      | .....      | .....      | .....      |
| PF07_0004_exon2_Kilifi_322   | -----      | -----      | .....C.     | .....      | .....      | .....      | .....      | .....      |
| PF07_0004_exon2_Kilifi_323   | -----      | -----      | .....C.     | .....      | .....      | .....      | .....      | .....      |
| PF07_0004_exon2_Kilifi_258   | -----      | -----      | .....       | .....      | .....      | .T...A...  | ...A....   | .....      |
| PF07_0004_exon2_Kilifi_290   | -----      | -----      | .....C.     | .....      | .....      | .....      | .....      | .....      |
| PF07_0004_exon2_Kilifi_297   | -----      | -----      | .....C.     | .....      | .....      | .....      | .....      | .....      |
| PF07_0004_exon2_Kilifi_299   | -----      | -----      | .....C.     | .....      | .....      | .....      | .....      | .....      |
| PF07_0004_exon2_Kilifi_301   | -----      | -----      | .....C.     | .....      | .....      | .....      | .....      | .....      |
| PF07_0004_exon2_Kilifi_302   | -----      | -----      | .....C.     | .....      | .....      | .....      | .....      | .....      |
| PF07_0004_exon2_Kilifi_310   | -----      | -----      | .....       | .....      | .....      | .T...A...  | ...A....   | .....      |
| PF07_0004_exon2_Kilifi_019   | -----      | -----      | .....       | .....      | .....      | .T...A...  | ...A....   | .....      |
| PF07_0004_exon2_Kilifi_044   | -----      | -----      | .....       | .....      | .....      | .....      | .....      | .....      |
| PF07_0004_exon2_Kilifi_093   | -----      | -----      | .....       | .....      | .....      | .T...A...  | ...A....   | .....      |
| PF07_0004_exon2_Kilifi_097   | -----      | -----      | .....C.     | .....      | .C.....    | .....      | .....      | .....      |
| PF07_0004_exon2_Kilifi_201   | -----      | -----      | .....C.     | .....      | .....      | .....      | .....      | .....      |
| PF07_0004_exon2_Kilifi_235   | -----      | -----      | .....C.     | .....      | .....      | .....      | .....      | .....      |
| PF07_0004_exon2_Kilifi_245   | -----      | -----      | .....C.     | .....      | .....      | .....      | .....      | .....      |
| PF07_0004_exon2_Kilifi_027   | -----      | -----      | .....       | .....      | .....      | .T...A...  | ...A....   | .....      |
| PF07_0004_exon2_Kilifi_028   | -----      | -----      | .....C.     | .....      | .....      | .....      | .....      | .....      |
| PF07_0004_exon2_Kilifi_050   | -----      | -----      | .....       | .....      | .....      | .T...A...  | ...A....   | .....      |
| PF07_0004_exon2_Kilifi_052   | -----      | -----      | .....C.     | .....      | .....      | .....      | .....      | .....      |
| PF07_0004_exon2_Kilifi_062   | -----      | -----      | .....C.     | .....      | .....      | .....      | .....      | .....      |
| PF07_0004_exon2_Kilifi_082   | -----      | -----      | .....C.     | .....      | .....      | .....      | .....      | .....      |
| PF07_0004_exon2_Kilifi_091   | -----      | -----      | .....C.     | .....      | .C.....    | .....      | .....      | .....      |
| PF07_0004_exon2_Kilifi_105   | -----      | -----      | .....C.     | .....      | .C.....    | .....      | .....      | .....      |
| PF07_0004_exon2_Kilifi_110   | -----      | -----      | .....       | .....      | .....      | .....      | .....      | .....      |
| PF07_0004_exon2_Kilifi_160   | .....      | .....      | .....       | .....      | .....      | .....      | .....      | .....      |
| PF07_0004_exon2_Kilifi_164   | -----      | -----      | .....C.     | .....      | .C.....    | .....      | .....      | .....      |
| PF07_0004_exon2_Kilifi_199   | -----      | -----      | .....C.     | .....      | .C.....    | .....      | .....      | .....      |
| PF07_0004_exon2_Kilifi_202   | .....C.    | .....      | .....       | .....      | .....      | .....      | .....      | .....      |
| PF07_0004_exon2_Kilifi_247   | -----      | -----      | .....       | .....      | .....      | .T...A...  | ...A....   | .....      |
| PF07_0004_exon2_Kilifi_249   | -----      | -----      | .....       | .....      | .....      | .T...A...  | ...A....   | .....      |
| PF07_0004_exon2_Kilifi_333   | -----      | -----      | .....       | .....      | .....      | .....      | .....      | .....      |
| PF07_0004_exon2_Kilifi_334   | -----      | -----      | .....C.     | .....      | .C.....    | .....      | .....      | .....      |
| PF07_0004_exon2_Kilifi_340   | -----      | -----      | .....C.     | .....      | .C.....    | .....      | .....      | .....      |
| PF07_0004_exon2_Kilifi_343   | .....      | .....      | .....       | .....      | .....      | .....      | .....      | .....      |
| PF07_0004_exon2_Kilifi_344   | -----      | -----      | .....C.     | .....      | .....      | .....      | .....      | .....      |
| PF07_0004_exon2_Kilifi_345   | -----      | -----      | .....C.     | .....      | .....      | .....      | .....      | .....      |
| PF07_0004_exon2_Kilifi_349   | .....      | .....      | .....       | .....      | .....      | .....      | .....      | .....      |
| PF07_0004_exon2_Kilifi_356   | -----      | -----      | .....       | .....      | .....      | .....      | .....      | .....      |
| PF07_0004_exon2_Kilifi_364   | -----      | -----      | .....       | .....      | .....      | .T...A...  | ...A....   | .....      |
| PF07_0004_exon2_Kilifi_328   | -----      | -----      | .....       | .....      | .....      | .....      | .....      | .....      |
| PF07_0004_exon2_Kilifi_365   | -----      | -----      | .....C.     | .....      | .....      | .....      | .....      | .....      |
| PF07_0004_exon2_Kilifi_384   | .....      | .....      | .....       | .....      | .....      | .....      | .....      | .....      |
| PF07_0004_exon2_Kilifi_389   | -----      | -----      | .....       | .....      | .....      | .....      | .....      | .....      |
| PF07_0004_exon2_Kilifi_406   | -----      | -----      | .....       | .....      | .....      | .T...A...  | ...A....   | .....      |
| PF07_0004_exon2_Kilifi_510   | .....      | .....      | .....       | .....      | .....      | .....      | .....      | .....      |
| PF07_0004_exon2_Kilifi_366   | -----      | -----      | .....       | .....      | .....      | .T...A...  | ...A....   | .....      |
| PF07_0004_exon2_Kilifi_023   | -----      | -----      | .....C.     | .....      | .....      | .....      | .....      | .....      |
| PF07_0004_exon2_Kilifi_057   | .....      | .....      | .....       | .....      | .....      | .....      | .....      | .....      |
| PF07_0004_exon2_Kilifi_191   | -----      | -----      | .....C.     | .....      | .....      | .....      | .....      | .....      |
| PF07_0004_exon2_Kilifi_194   | -----      | -----      | .....C.     | .....      | .....      | .....      | .....      | .....      |
| PF07_0004_exon2_Kilifi_250   | -----      | -----      | .....C.     | .....      | .....      | .....      | .....      | .....      |
| PF07_0004_exon2_Kilifi_289   | -----      | -----      | .....C.     | .....      | .....      | .....      | .....      | .....      |
| PF07_0004_exon2_Kilifi_328   | -----      | -----      | .....       | .....      | .....      | .....      | .....      | .....      |
| PF07_0004_exon2_Kilifi_348   | -----      | -----      | .....C.     | .....      | .....      | .....      | .....      | .....      |
| <i>Plasmodium reichenowi</i> | -----      | -----      | G...A.G.TTA | ..CCAG...  | .....G.    | .....      | .T...T...  | .....      |

|                              | 970        | 980        | 990        | 1000       | 1010  | 1020       | 1030       | 1040       |
|------------------------------|------------|------------|------------|------------|-------|------------|------------|------------|
| PF07_0004_3D7_exon2          | AAAAGAGATG | CAACACAAAC | GCAAGATAAT | TTAAGAAGGG | AAGAA |            |            |            |
| PF07_0004_exon2_Kilifi_311   |            |            |            |            |       |            |            |            |
| PF07_0004_exon2_Kilifi_314   |            |            |            | A          |       |            |            |            |
| PF07_0004_exon2_Kilifi_319   |            |            |            |            |       |            |            |            |
| PF07_0004_exon2_Kilifi_321   |            |            |            |            |       |            |            |            |
| PF07_0004_exon2_Kilifi_322   |            |            |            |            |       |            |            |            |
| PF07_0004_exon2_Kilifi_323   |            |            |            |            |       |            |            |            |
| PF07_0004_exon2_Kilifi_258   | A          | T          |            | A          |       |            |            |            |
| PF07_0004_exon2_Kilifi_290   |            |            |            |            |       |            |            |            |
| PF07_0004_exon2_Kilifi_297   |            |            |            |            |       |            |            |            |
| PF07_0004_exon2_Kilifi_299   |            |            |            |            |       |            |            |            |
| PF07_0004_exon2_Kilifi_301   |            |            |            |            |       |            |            |            |
| PF07_0004_exon2_Kilifi_302   |            |            |            |            |       |            |            |            |
| PF07_0004_exon2_Kilifi_310   | A          | T          |            | A          |       |            |            |            |
| PF07_0004_exon2_Kilifi_019   | A          | T          |            | A          |       |            |            |            |
| PF07_0004_exon2_Kilifi_044   |            |            |            |            |       |            |            |            |
| PF07_0004_exon2_Kilifi_093   | A          | T          |            | A          |       |            |            |            |
| PF07_0004_exon2_Kilifi_097   |            |            |            |            |       |            |            |            |
| PF07_0004_exon2_Kilifi_201   |            |            |            |            |       |            |            |            |
| PF07_0004_exon2_Kilifi_235   |            |            |            |            |       |            |            |            |
| PF07_0004_exon2_Kilifi_245   |            |            |            |            |       |            |            |            |
| PF07_0004_exon2_Kilifi_027   | A          | T          |            | A          |       |            |            |            |
| PF07_0004_exon2_Kilifi_028   |            |            |            |            |       |            |            |            |
| PF07_0004_exon2_Kilifi_050   | A          | T          |            | A          |       |            |            |            |
| PF07_0004_exon2_Kilifi_052   |            |            |            |            |       |            |            |            |
| PF07_0004_exon2_Kilifi_062   |            |            |            |            |       |            |            |            |
| PF07_0004_exon2_Kilifi_082   |            |            |            |            |       |            |            |            |
| PF07_0004_exon2_Kilifi_091   |            |            |            |            |       |            |            |            |
| PF07_0004_exon2_Kilifi_105   |            |            |            |            |       |            |            |            |
| PF07_0004_exon2_Kilifi_110   |            |            |            |            |       |            |            |            |
| PF07_0004_exon2_Kilifi_160   |            |            |            |            |       |            |            |            |
| PF07_0004_exon2_Kilifi_164   |            |            |            |            |       |            |            |            |
| PF07_0004_exon2_Kilifi_199   |            |            |            |            |       |            |            |            |
| PF07_0004_exon2_Kilifi_202   |            |            |            |            |       |            |            |            |
| PF07_0004_exon2_Kilifi_247   | A          | T          |            | A          |       |            |            |            |
| PF07_0004_exon2_Kilifi_249   | A          | T          |            | A          |       |            |            |            |
| PF07_0004_exon2_Kilifi_333   |            |            |            |            |       |            |            |            |
| PF07_0004_exon2_Kilifi_334   |            |            |            |            |       |            |            |            |
| PF07_0004_exon2_Kilifi_340   |            |            |            |            |       |            |            |            |
| PF07_0004_exon2_Kilifi_343   |            |            |            |            |       |            |            |            |
| PF07_0004_exon2_Kilifi_344   |            |            |            |            | GGAAA | ACCATATGAT | CCTTTAAAAA | GAGATGCAAC |
| PF07_0004_exon2_Kilifi_345   |            |            |            |            |       |            |            |            |
| PF07_0004_exon2_Kilifi_349   |            |            |            |            |       |            |            |            |
| PF07_0004_exon2_Kilifi_356   |            |            |            |            |       |            |            |            |
| PF07_0004_exon2_Kilifi_364   | A          | T          |            | A          |       |            |            |            |
| PF07_0004_exon2_Kilifi_328   |            | T          |            | A          |       | AGAAA      | ACCATATGAT | CCTTTAAAAA |
| PF07_0004_exon2_Kilifi_365   |            |            |            |            |       |            |            |            |
| PF07_0004_exon2_Kilifi_384   |            |            |            |            |       |            |            |            |
| PF07_0004_exon2_Kilifi_389   |            |            |            |            |       |            |            |            |
| PF07_0004_exon2_Kilifi_406   | A          | T          |            | A          |       |            |            |            |
| PF07_0004_exon2_Kilifi_510   |            |            |            |            |       |            |            |            |
| PF07_0004_exon2_Kilifi_366   | A          | T          |            | A          |       | AGAAA      | ACCATATGAT | CCTTTAAAAA |
| PF07_0004_exon2_Kilifi_023   |            |            |            |            |       |            |            |            |
| PF07_0004_exon2_Kilifi_057   |            |            |            |            |       |            |            |            |
| PF07_0004_exon2_Kilifi_191   |            |            |            |            |       |            |            |            |
| PF07_0004_exon2_Kilifi_194   |            |            |            |            |       |            |            |            |
| PF07_0004_exon2_Kilifi_250   |            |            |            |            |       |            |            |            |
| PF07_0004_exon2_Kilifi_289   |            |            |            |            |       |            |            |            |
| PF07_0004_exon2_Kilifi_328   |            | T          |            | A          |       | AGAAA      | ACCATATGAT | CCTTTAAAAA |
| PF07_0004_exon2_Kilifi_348   |            |            |            |            |       |            |            |            |
| <i>Plasmodium reichenowi</i> |            | T          | A          | A          | T     |            |            |            |













|                              | 1450       | 1460       | 1470       | 1480       | 1490       | 1500       | 1510       | 1520       |
|------------------------------|------------|------------|------------|------------|------------|------------|------------|------------|
| PF07_0004_3D7_exon2          | GCGCAAGGTA | ATATAAAAAG | GGAAGAAATA | ATAATACAAG | ATGCTTTTAA | AAAAGATGAA | AGGAAATCTC | AAAATACGTC |
| PF07_0004_exon2_Kilifi_311   | .....      | .....      | .....      | .....      | .....      | .....      | ..A.....   | .....T     |
| PF07_0004_exon2_Kilifi_314   | A.A....A.. | T.T.....   | A.....     | .....      | .....      | .....      | ..A.....   | .....T     |
| PF07_0004_exon2_Kilifi_319   | .....      | .....      | .....      | .....      | .....      | .....      | ..A.....   | .....T     |
| PF07_0004_exon2_Kilifi_321   | A.A....A.. | T.T.....   | A.....     | .....      | .....      | .....      | ..A.....   | .....T     |
| PF07_0004_exon2_Kilifi_322   | .....      | .....      | .....      | .....      | .....      | .....      | .....      | .....T     |
| PF07_0004_exon2_Kilifi_323   | .....      | .....      | .....      | .....      | .....      | .....      | ..A.....   | .....T     |
| PF07_0004_exon2_Kilifi_258   | .....      | .....      | .....      | .....      | .....      | .....      | .....      | .....T     |
| PF07_0004_exon2_Kilifi_290   | .....      | ..T.....   | .....      | .....      | .....      | .....      | .....      | .....T     |
| PF07_0004_exon2_Kilifi_297   | .....      | .....      | .....      | .....      | .....      | .....      | .....      | .....T     |
| PF07_0004_exon2_Kilifi_299   | .....      | .....      | .....      | .....      | .....      | .....      | .....      | .....T     |
| PF07_0004_exon2_Kilifi_301   | .....      | .....      | .....      | .....      | .....      | .....      | ..A.....   | .....T     |
| PF07_0004_exon2_Kilifi_302   | .....      | .....      | .....      | .....      | .....      | .....      | ..A.....   | .....T     |
| PF07_0004_exon2_Kilifi_310   | .....      | .....      | .....      | .....      | .....      | .....      | .....      | .....T     |
| PF07_0004_exon2_Kilifi_019   | .....      | .....      | .....      | .....      | .....      | .....      | .....      | .....T     |
| PF07_0004_exon2_Kilifi_044   | .....      | .....      | .....      | .....      | .....      | .....      | ..A.....   | .....T     |
| PF07_0004_exon2_Kilifi_093   | .....      | .....      | .....      | .....      | .....      | .....      | .....      | .....T     |
| PF07_0004_exon2_Kilifi_097   | .....      | .....      | .....      | .....      | .....      | .....      | ..A.....   | .....T     |
| PF07_0004_exon2_Kilifi_201   | .....      | .....      | .....      | .....      | .....      | .....      | .....      | .....T     |
| PF07_0004_exon2_Kilifi_235   | .....      | .....      | .....      | .....      | .....      | .....      | .....      | .....T     |
| PF07_0004_exon2_Kilifi_245   | .....      | .....      | .....      | .....      | .....      | .....      | .....      | .....T     |
| PF07_0004_exon2_Kilifi_027   | .....      | .....      | .....      | .....      | .....      | .....      | .....      | .....T     |
| PF07_0004_exon2_Kilifi_028   | .....      | .....      | .....      | .....      | .....      | .....      | ..A.....   | .....T     |
| PF07_0004_exon2_Kilifi_050   | .....      | .....      | .....      | .....      | .....      | .....      | .....      | ..C.....T  |
| PF07_0004_exon2_Kilifi_052   | .....      | .....      | .....      | .....      | .....      | .....      | ..A.....   | .....T     |
| PF07_0004_exon2_Kilifi_062   | .....      | .....      | .....      | .....      | .....      | .....      | ..A.....   | .....T     |
| PF07_0004_exon2_Kilifi_082   | .....      | .....      | .....      | .....      | .....      | .....      | ..A.....   | .....T     |
| PF07_0004_exon2_Kilifi_091   | .....      | .....      | .....      | .....      | .....      | .....      | ..A.....   | .....T     |
| PF07_0004_exon2_Kilifi_105   | .....      | .....      | .....      | .....      | .....      | .....      | ..A.....   | .....T     |
| PF07_0004_exon2_Kilifi_110   | -----      | -----      | A.....     | .....      | .....      | .....      | ..A.....   | .....T     |
| PF07_0004_exon2_Kilifi_160   | .....      | .....      | .....      | .....      | .....      | .....      | ..A.....   | .....T     |
| PF07_0004_exon2_Kilifi_164   | .....      | .....      | .....      | .....      | .....      | .....      | ..A.....   | .....T     |
| PF07_0004_exon2_Kilifi_199   | .....      | .....      | .....      | .....      | .....      | .....      | ..A.....   | .....T     |
| PF07_0004_exon2_Kilifi_202   | .....      | .....      | .....      | .....      | .....      | .....      | ..A.....   | .....T     |
| PF07_0004_exon2_Kilifi_247   | .....      | .....      | .....      | .....      | .....      | .....      | ..A.....   | .....T     |
| PF07_0004_exon2_Kilifi_249   | .....      | .....      | .....      | .....      | .....      | .....      | .....      | .....T     |
| PF07_0004_exon2_Kilifi_333   | .....      | .....      | .....      | .....      | .....      | .....      | ..A.....   | .....T     |
| PF07_0004_exon2_Kilifi_334   | .....      | .....      | .....      | .....      | .....      | .....      | .....      | .....T     |
| PF07_0004_exon2_Kilifi_340   | .....      | .....      | .....      | .....      | .....      | .....      | ..A.....   | .....T     |
| PF07_0004_exon2_Kilifi_343   | .....      | .....      | .....      | .....      | .....      | .....      | ..A.....   | .....T     |
| PF07_0004_exon2_Kilifi_344   | .....      | .....      | .....      | .....      | .....      | .....      | .....      | .....T     |
| PF07_0004_exon2_Kilifi_345   | .....      | .....      | .....      | .....      | .....      | .....      | .....      | .....T     |
| PF07_0004_exon2_Kilifi_349   | .....      | .....      | .....      | .....      | .....      | .....      | ..A.....   | .....T     |
| PF07_0004_exon2_Kilifi_356   | .....      | .....      | .....      | .....      | .....      | .....      | .....      | .....T     |
| PF07_0004_exon2_Kilifi_364   | .....      | .....      | .....      | .....      | .....      | .....      | .....      | .....T     |
| PF07_0004_exon2_Kilifi_328   | A.A....A.. | T.T.....   | A.....     | .....      | .....      | .....      | ..A.....   | .....T     |
| PF07_0004_exon2_Kilifi_365   | .....      | .....      | .....      | .....      | .....      | .....      | ..A.....   | .....T     |
| PF07_0004_exon2_Kilifi_384   | .....      | .....      | .....      | .....      | .....      | .....      | ..A.....   | .....T     |
| PF07_0004_exon2_Kilifi_389   | -----      | -----      | A.....     | .....      | .....      | .....      | ..A.....   | .....T     |
| PF07_0004_exon2_Kilifi_406   | .....      | .....      | .....      | .....      | .....      | .....      | .....      | .....T     |
| PF07_0004_exon2_Kilifi_510   | .....      | .....      | .....      | .....      | .....      | .....      | .....      | .....T     |
| PF07_0004_exon2_Kilifi_366   | .....      | .....      | .....      | .....      | .....      | .....      | .....      | .....T     |
| PF07_0004_exon2_Kilifi_023   | .....      | .....      | .....      | .....      | .....      | .....      | ..A.....   | .....T     |
| PF07_0004_exon2_Kilifi_057   | -----      | -----      | .....      | .....      | .....      | .....      | .....      | .....T     |
| PF07_0004_exon2_Kilifi_191   | .....      | .....      | .....      | .....      | .....      | .....      | .....      | .....T     |
| PF07_0004_exon2_Kilifi_194   | .....      | .....      | .....      | .....      | .....      | .....      | ..A.....   | .....T     |
| PF07_0004_exon2_Kilifi_250   | .....      | .....      | .....      | .....      | .....      | .....      | ..A.....   | .....T     |
| PF07_0004_exon2_Kilifi_289   | .....      | .....      | .....      | .....      | .....      | .....      | ..A.....   | .....T     |
| PF07_0004_exon2_Kilifi_328   | A.A....A.. | T.T.....   | A.....     | .....      | .....      | .....      | ..A.....   | .....T     |
| PF07_0004_exon2_Kilifi_348   | .....      | .....      | .....      | .....      | .....      | .....      | ..A.....   | .....T     |
| <i>Plasmodium reichenowi</i> | -----      | -----      | -----      | .....      | ..A.....   | ..G.....   | ..A...C... | .....A.T   |

|                              | 1530         | 1540       | 1550       | 1560        | 1570        | 1580       | 1590       | 1600                  |
|------------------------------|--------------|------------|------------|-------------|-------------|------------|------------|-----------------------|
| PF07_0004_3D7_exon2          | CAA          | AATGGAT    | GAAATAACAA | TACAGGATAA  | TTTAGGGAGA  | GATAGAATAA | TAGTAAAGGA | TACTTTTAAG AAAGAAGAAA |
| PF07_0004_exon2_Kilifi_311   | .....G.....  | .....      | .....      | .....A..... | .....       | .....      | .....      | .....                 |
| PF07_0004_exon2_Kilifi_314   | .....G.....  | .....      | .....      | .....A..... | .....       | .....      | .....      | .....                 |
| PF07_0004_exon2_Kilifi_319   | .....G.....  | .....      | .....      | .....A..... | .....       | .....      | .....      | .....                 |
| PF07_0004_exon2_Kilifi_321   | .....G.....  | .....      | .....      | .....A..... | .....       | .....      | .....      | .....                 |
| PF07_0004_exon2_Kilifi_322   | .....G.....  | .....      | .....      | .....       | .....       | .....      | .....      | .....                 |
| PF07_0004_exon2_Kilifi_323   | .....G.....  | .....      | .....      | .....A..... | .....       | .....      | .....      | .....                 |
| PF07_0004_exon2_Kilifi_258   | .....        | .....      | .....      | .....       | .....       | .....      | .....      | .....                 |
| PF07_0004_exon2_Kilifi_290   | .....        | .....      | .....      | .....       | .....       | .....      | .....      | .....                 |
| PF07_0004_exon2_Kilifi_297   | .....        | .....      | .....      | .....       | .....       | .....      | .....      | .....                 |
| PF07_0004_exon2_Kilifi_299   | .....G.....  | .....      | .....      | .....       | .....       | .....      | .....      | .....                 |
| PF07_0004_exon2_Kilifi_301   | .....G.....  | .....      | .....      | .....A..... | .....       | .....      | .....      | .....                 |
| PF07_0004_exon2_Kilifi_302   | .....G.....  | .....      | .....      | .....A..... | .....       | .....      | .....      | .....                 |
| PF07_0004_exon2_Kilifi_310   | .....        | .....      | .....      | .....       | .....       | .....      | .....      | .....                 |
| PF07_0004_exon2_Kilifi_019   | .....        | .....      | .....      | .....C..... | .....       | .....      | .....      | .....                 |
| PF07_0004_exon2_Kilifi_044   | .....G.....  | .....      | .....      | .....A..... | .....       | .....      | .....      | .....                 |
| PF07_0004_exon2_Kilifi_093   | .....        | .....      | .....      | .....       | .....       | .....      | .....      | .....                 |
| PF07_0004_exon2_Kilifi_097   | .....G.....  | .....      | .....      | .....A..... | .....       | .....      | .....      | .....                 |
| PF07_0004_exon2_Kilifi_201   | .....G.....  | .....      | .....      | .....A..... | .....       | .....      | .....      | .....                 |
| PF07_0004_exon2_Kilifi_235   | .....G.....  | .....      | .....      | .....       | .....       | .....      | .....      | .....                 |
| PF07_0004_exon2_Kilifi_245   | .....G.....  | .....      | .....      | .....       | .....       | .....      | .....      | .....                 |
| PF07_0004_exon2_Kilifi_027   | .....        | .....      | .....      | .....       | .....       | .....      | .....      | .....                 |
| PF07_0004_exon2_Kilifi_028   | .....G.....  | .....      | .....      | .....A..... | .....       | .....      | .....      | .....                 |
| PF07_0004_exon2_Kilifi_050   | .....        | .....      | .....      | .....       | .....       | .....      | .....      | .....                 |
| PF07_0004_exon2_Kilifi_052   | .....G.....  | .....      | .....      | .....A..... | .....       | .....      | .....      | .....                 |
| PF07_0004_exon2_Kilifi_062   | .....G.....  | .....      | .....      | .....A..... | .....       | .....      | .....      | .....                 |
| PF07_0004_exon2_Kilifi_082   | .....G.....  | .....      | .....      | .....A..... | .....       | .....      | .....      | .....                 |
| PF07_0004_exon2_Kilifi_091   | .....G.....  | .....      | .....      | .....A..... | .....       | .....      | .....      | .....                 |
| PF07_0004_exon2_Kilifi_105   | .....G.....  | .....      | .....      | .....A..... | .....       | .....      | .....      | .....                 |
| PF07_0004_exon2_Kilifi_110   | .....        | .....      | .....      | .....A..... | .....       | .....      | .....      | .....                 |
| PF07_0004_exon2_Kilifi_160   | .....G.....  | .....      | .....      | .....A..... | .....       | .....      | .....      | .....                 |
| PF07_0004_exon2_Kilifi_164   | .....G.....  | .....      | .....      | .....A..... | .....       | .....      | .....      | .....                 |
| PF07_0004_exon2_Kilifi_199   | .....G.....  | .....      | .....      | .....A..... | .....       | .....      | .....      | .....                 |
| PF07_0004_exon2_Kilifi_202   | .....G.....  | .....      | .....      | .....A..... | .....       | .....      | .....      | .....                 |
| PF07_0004_exon2_Kilifi_247   | .....G.....  | .....      | .....      | .....A..... | .....       | .....      | .....      | .....                 |
| PF07_0004_exon2_Kilifi_249   | .....G.....  | .....      | .....      | .....A..... | .....       | .....      | .....      | .....                 |
| PF07_0004_exon2_Kilifi_333   | .....G.....  | .....      | .....      | .....A..... | .....       | .....      | .....      | .....                 |
| PF07_0004_exon2_Kilifi_334   | .....        | .....      | .....      | .....       | .....       | .....      | .....      | .....                 |
| PF07_0004_exon2_Kilifi_340   | .....G.....  | .....      | .....      | .....A..... | .....       | .....      | .....      | .....                 |
| PF07_0004_exon2_Kilifi_343   | .....G.....  | .....      | .....      | .....A..... | .....       | .....      | .....      | .....                 |
| PF07_0004_exon2_Kilifi_344   | .....        | .....      | .....      | .....       | .....       | .....      | .....      | .....                 |
| PF07_0004_exon2_Kilifi_345   | .....        | .....      | .....      | .....       | .....       | .....      | .....      | .....                 |
| PF07_0004_exon2_Kilifi_349   | .....G.....  | .....      | .....      | .....A..... | .....       | .....      | .....      | .....                 |
| PF07_0004_exon2_Kilifi_356   | .....        | .....      | .....      | .....       | .....       | .....      | .....      | .....                 |
| PF07_0004_exon2_Kilifi_364   | .....        | .....      | .....      | .....       | .....       | .....      | .....      | .....                 |
| PF07_0004_exon2_Kilifi_328   | .....        | .....      | .....      | .....A..... | .....       | .....      | .....      | .....                 |
| PF07_0004_exon2_Kilifi_365   | .....G.....  | .....      | .....      | .....A..... | .....       | .....      | .....      | .....                 |
| PF07_0004_exon2_Kilifi_384   | .....G.....  | .....      | .....      | .....A..... | .....       | .....      | .....      | .....                 |
| PF07_0004_exon2_Kilifi_389   | .....        | .....      | .....      | .....A..... | .....       | .....      | .....      | .....                 |
| PF07_0004_exon2_Kilifi_406   | .....        | .....      | .....      | .....       | .....       | .....      | .....      | .....                 |
| PF07_0004_exon2_Kilifi_510   | .....        | .....      | .....      | .....       | .....       | .....      | .....      | .....                 |
| PF07_0004_exon2_Kilifi_366   | .....        | .....      | .....      | .....       | .....       | .....      | .....      | .....                 |
| PF07_0004_exon2_Kilifi_023   | .....G.....  | .....      | .....      | .....A..... | .....       | .....      | .....      | .....                 |
| PF07_0004_exon2_Kilifi_057   | .....        | .....      | .....      | .....       | .....       | .....      | .....      | .....                 |
| PF07_0004_exon2_Kilifi_191   | .....        | .....      | .....      | .....       | .....       | .....      | .....      | .....                 |
| PF07_0004_exon2_Kilifi_194   | .....G.....  | .....      | .....      | .....A..... | .....       | .....      | .....      | .....                 |
| PF07_0004_exon2_Kilifi_250   | .....G.....  | .....      | .....      | .....A..... | .....       | .....      | .....      | .....                 |
| PF07_0004_exon2_Kilifi_289   | .....G.....  | .....      | .....      | .....A..... | .....       | .....      | .....      | .....                 |
| PF07_0004_exon2_Kilifi_328   | .....        | .....      | .....      | .....A..... | .....       | .....      | .....      | .....                 |
| PF07_0004_exon2_Kilifi_348   | .....G.....  | .....      | .....      | .....A..... | .....       | .....      | .....      | .....                 |
| <i>Plasmodium reichenowi</i> | A.....G..... | .G...G.T.. | .....      | .....       | .....A..... | .....C.A.C | ..T.....   | .....G                |















|                              | 2090       | 2100       | 2110       | 2120       | 2130       | 2140       | 2150       | 2160       |
|------------------------------|------------|------------|------------|------------|------------|------------|------------|------------|
| PF07_0004_3D7_exon2          | AATATGAAGA | TGCAGATGAA | GATTTAACAA | AAAAATATAG | AATGAAAGAA | CTTATGAGTT | TATATTTTGA | GGATATGGAT |
| PF07_0004_exon2_Kilifi_311   | .....      | .....      | .....      | .....      | .....      | .....A     | .....A     | .....      |
| PF07_0004_exon2_Kilifi_314   | .....      | .....      | .....      | .....      | .....      | .....A     | .....A     | .....      |
| PF07_0004_exon2_Kilifi_319   | .....      | .....      | .....      | .....      | .....      | .....      | .....      | .....      |
| PF07_0004_exon2_Kilifi_321   | .....      | .....      | .....      | .....      | .....      | .....      | .....      | .....      |
| PF07_0004_exon2_Kilifi_322   | .....      | .....      | .....      | .....      | .....      | .....      | .....      | .....      |
| PF07_0004_exon2_Kilifi_323   | .....      | .....      | .....      | .....      | .....      | .....      | .....      | .....      |
| PF07_0004_exon2_Kilifi_258   | .....      | .....      | .....      | .....      | .....      | .....      | .....      | .....      |
| PF07_0004_exon2_Kilifi_290   | .....      | .....      | .....      | .....      | .....      | .....      | .....      | .....      |
| PF07_0004_exon2_Kilifi_297   | .....      | .....      | .....      | .....      | .....      | .....A     | .....A     | .....      |
| PF07_0004_exon2_Kilifi_299   | .....      | .....      | .....      | .....      | .....      | .....A     | .....A     | .....      |
| PF07_0004_exon2_Kilifi_301   | .....      | .....      | .....      | .....      | .....      | .....A     | .....A     | .....      |
| PF07_0004_exon2_Kilifi_302   | .....      | .....      | .....      | .....T     | .....      | .....      | .....      | .....      |
| PF07_0004_exon2_Kilifi_310   | .....      | .....      | .....      | .....      | .....      | .....      | .....      | .....      |
| PF07_0004_exon2_Kilifi_019   | .....      | .....      | .....      | .....      | .....      | .....A     | .....A     | .....      |
| PF07_0004_exon2_Kilifi_044   | .....      | .....      | .....      | .....      | .....      | .....      | .....      | .....      |
| PF07_0004_exon2_Kilifi_093   | .....      | .....      | .....      | .....      | .....      | .....      | .....      | .....      |
| PF07_0004_exon2_Kilifi_097   | .....      | .....      | .....      | .....      | .....      | .....      | .....      | .....      |
| PF07_0004_exon2_Kilifi_201   | .....      | .....      | .....      | .....      | .....      | .....A     | .....A     | .....      |
| PF07_0004_exon2_Kilifi_235   | .....      | .....      | .....      | .....      | .....      | .....      | .....      | .....      |
| PF07_0004_exon2_Kilifi_245   | .....      | .....      | .....      | .....      | .....      | .....A     | .....A     | .....      |
| PF07_0004_exon2_Kilifi_027   | .....      | .....      | .....      | .....      | .....      | .....A     | .....A     | .....      |
| PF07_0004_exon2_Kilifi_028   | .....      | .....      | .....      | .....      | .....      | .....      | .....      | .....      |
| PF07_0004_exon2_Kilifi_050   | .....      | .....      | .....      | .....      | .....      | .....A     | .....A     | .....      |
| PF07_0004_exon2_Kilifi_052   | .....      | .....      | .....      | .....      | .....      | .....      | .....      | .....      |
| PF07_0004_exon2_Kilifi_062   | .....      | .....      | .....      | .....      | .....      | .....      | .....      | .....      |
| PF07_0004_exon2_Kilifi_082   | .....      | .....      | .....      | .....      | .....      | .....A     | .....A     | .....      |
| PF07_0004_exon2_Kilifi_091   | .....      | .....      | .....      | .....      | .....      | .....A     | .....A     | .....      |
| PF07_0004_exon2_Kilifi_105   | .....      | .....      | .....      | .....      | .....      | .....A     | .....A     | .....      |
| PF07_0004_exon2_Kilifi_110   | .....      | .....      | .....      | .....      | .....      | .....A     | .....A     | .....      |
| PF07_0004_exon2_Kilifi_160   | .....      | .....      | .....      | .....      | .....      | .....      | .....      | .....      |
| PF07_0004_exon2_Kilifi_164   | .....      | .....      | .....      | .....      | .....      | .....A     | .....A     | .....      |
| PF07_0004_exon2_Kilifi_199   | .....      | .....      | .....      | .....      | .....      | .....      | .....      | .....      |
| PF07_0004_exon2_Kilifi_202   | .....      | .....      | .....      | .....      | .....      | .....      | .....      | .....      |
| PF07_0004_exon2_Kilifi_247   | .....      | .....      | .....      | .....      | .....      | .....      | .....      | .....      |
| PF07_0004_exon2_Kilifi_249   | .....      | .....      | .....      | .....      | .....      | .....      | .....      | .....      |
| PF07_0004_exon2_Kilifi_333   | .....      | .....      | .....      | .....      | .....      | .....      | .....      | .....      |
| PF07_0004_exon2_Kilifi_334   | .....      | .....      | .....      | .....      | .....      | .....A     | .....A     | .....      |
| PF07_0004_exon2_Kilifi_340   | .....      | .....      | .....      | .....      | .....      | .....A     | .....A     | .....      |
| PF07_0004_exon2_Kilifi_343   | .....      | .....      | .....      | .....      | .....      | .....      | .....      | .....      |
| PF07_0004_exon2_Kilifi_344   | .....      | .....      | .....      | .....      | .....      | .....A     | .....A     | .....      |
| PF07_0004_exon2_Kilifi_345   | .....      | .....      | .....      | .....      | .....      | .....      | .....      | .....      |
| PF07_0004_exon2_Kilifi_349   | .....      | .....      | .....      | .....      | .....      | .....A     | .....A     | .....      |
| PF07_0004_exon2_Kilifi_356   | .....      | .....      | .....      | .....      | .....      | .....      | .....      | .....      |
| PF07_0004_exon2_Kilifi_364   | .....      | .....      | .....      | .....      | .....      | .....A     | .....A     | .....      |
| PF07_0004_exon2_Kilifi_328   | .....      | .....      | .....      | .....      | .....      | .....A     | .....A     | .....      |
| PF07_0004_exon2_Kilifi_365   | .....      | .....      | .....      | .....      | .....      | .....      | .....      | .....      |
| PF07_0004_exon2_Kilifi_384   | .....      | .....      | .....      | .....      | .....      | .....A     | .....A     | .....      |
| PF07_0004_exon2_Kilifi_389   | .....      | .....      | .....      | .....      | .....      | .....A     | .....A     | .....      |
| PF07_0004_exon2_Kilifi_406   | .....      | .....      | .....      | .....      | .....      | .....A     | .....A     | .....      |
| PF07_0004_exon2_Kilifi_510   | .....      | .....      | .....      | .....      | .....      | .....A     | .....A     | .....      |
| PF07_0004_exon2_Kilifi_366   | .....      | .....      | .....      | .....      | .....      | .....A     | .....A     | .....      |
| PF07_0004_exon2_Kilifi_023   | .....      | .....      | .....      | .....      | .....      | .....      | .....      | .....      |
| PF07_0004_exon2_Kilifi_057   | .....      | .....      | .....      | .....      | .....      | .....A     | .....A     | .....      |
| PF07_0004_exon2_Kilifi_191   | .....      | .....      | .....      | .....      | .....      | .....A     | .....A     | .....      |
| PF07_0004_exon2_Kilifi_194   | .....      | .....      | .....      | .....      | .....      | .....A     | .....A     | .....      |
| PF07_0004_exon2_Kilifi_250   | .....      | .....      | .....      | .....      | .....      | .....      | .....      | .....      |
| PF07_0004_exon2_Kilifi_289   | .....      | .....      | .....      | .....      | .....      | .....A     | .....A     | .....      |
| PF07_0004_exon2_Kilifi_328   | .....      | .....      | .....      | .....      | .....      | .....A     | .....A     | .....      |
| PF07_0004_exon2_Kilifi_348   | .....      | .....      | .....      | .....      | .....      | .....      | .....      | .....      |
| <i>Plasmodium reichenowi</i> | -----      | .....      | G          | .....      | .....      | .....A     | .....T.TA  | .....      |

|                              | 2170       | 2180       | 2190      | 2200       | 2210        | 2220        | 2230        | 2240       |
|------------------------------|------------|------------|-----------|------------|-------------|-------------|-------------|------------|
| PF07_0004_3D7_exon2          | TACTTTCATC | AAAGTGATAT | ATAT----- | -----AAAG  | TTATTGAAAA  | ATATAGTAAA  | CAAAAAGAAT  | ATTCTTCTAT |
| PF07_0004_exon2_Kilifi_311   | .....      | .....      | -----     | -----      | .....A..... | .....       | .....       | .....      |
| PF07_0004_exon2_Kilifi_314   | .....      | .....      | -----     | -----      | .....A..... | .....       | .....       | .....      |
| PF07_0004_exon2_Kilifi_319   | .....      | .....      | -----     | -----      | .....       | .....       | .....       | .....      |
| PF07_0004_exon2_Kilifi_321   | .....      | .....      | -----     | -----      | .....       | .....       | .....       | .....      |
| PF07_0004_exon2_Kilifi_322   | .....      | .....      | -----     | -----      | .....       | .....       | .....       | .....      |
| PF07_0004_exon2_Kilifi_323   | .....      | .....      | -----     | -----      | .....       | .....       | .....       | .....      |
| PF07_0004_exon2_Kilifi_258   | .....      | .....      | -----     | -----      | .....       | .....       | .....       | .....      |
| PF07_0004_exon2_Kilifi_290   | .....      | .....      | -----     | -----      | .....       | .....       | .....       | .....      |
| PF07_0004_exon2_Kilifi_297   | .....      | .....      | -----     | -----      | .....A..... | .....       | .....       | .....      |
| PF07_0004_exon2_Kilifi_299   | .....      | .....      | -----     | -----      | .....A..... | .....       | .....       | .....      |
| PF07_0004_exon2_Kilifi_301   | .....      | .....      | -----     | -----      | .....A..... | .....       | .....       | .....      |
| PF07_0004_exon2_Kilifi_302   | .....      | .....      | -----     | -----      | .....       | .....       | .....       | .....      |
| PF07_0004_exon2_Kilifi_310   | .....      | .....      | -----     | -----      | .....       | .....       | .....       | .....      |
| PF07_0004_exon2_Kilifi_019   | .....      | .....      | -----     | -----      | .....A..... | .....       | .....       | .....      |
| PF07_0004_exon2_Kilifi_044   | .....      | .....      | -----     | -----      | .....       | .....       | .....       | .....      |
| PF07_0004_exon2_Kilifi_093   | .....      | .....      | -----     | -----      | .....       | .....       | .....       | .....      |
| PF07_0004_exon2_Kilifi_097   | .....      | .....      | -----     | -----      | .....       | .....       | .....       | .....      |
| PF07_0004_exon2_Kilifi_201   | .....      | .....      | -----     | -----      | .....       | .....       | .....       | .....      |
| PF07_0004_exon2_Kilifi_235   | .....      | .....      | -----     | -----      | .....       | .....       | .....       | .....      |
| PF07_0004_exon2_Kilifi_245   | ...C.....  | .....      | -----     | -----      | .....       | .....       | .....       | .....      |
| PF07_0004_exon2_Kilifi_027   | .....      | .....      | -----     | -----      | .....A..... | .....       | .....       | .....      |
| PF07_0004_exon2_Kilifi_028   | .....      | .....      | -----     | -----      | .....       | .....       | .....       | .....      |
| PF07_0004_exon2_Kilifi_050   | .....      | .....      | -----     | -----      | .....A..... | .....       | .....       | .....      |
| PF07_0004_exon2_Kilifi_052   | .....      | .....      | -----     | -----      | .....       | .....       | .....       | .....      |
| PF07_0004_exon2_Kilifi_062   | .....      | .....      | -----     | -----      | .....       | .....       | .....       | .....      |
| PF07_0004_exon2_Kilifi_082   | .....      | .....      | -----     | -----      | .....A..... | .....       | .....       | .....      |
| PF07_0004_exon2_Kilifi_091   | .....      | .....      | -----     | -----      | .....       | .....       | .....       | .....      |
| PF07_0004_exon2_Kilifi_105   | .....      | .....      | -----     | -----      | .....       | .....       | .....       | .....      |
| PF07_0004_exon2_Kilifi_110   | .....      | .....      | -----     | -----      | .....A..... | .....       | .....       | .....      |
| PF07_0004_exon2_Kilifi_160   | .....      | .....      | -----     | -----      | .....       | .....       | .....       | .....      |
| PF07_0004_exon2_Kilifi_164   | .....      | .....      | -----     | -----      | .....       | .....       | .....       | .....      |
| PF07_0004_exon2_Kilifi_199   | .....      | .....      | -----     | -----      | .....       | .....       | .....       | .....      |
| PF07_0004_exon2_Kilifi_202   | .....      | .....      | -----     | -----      | .....       | .....       | .....       | .....      |
| PF07_0004_exon2_Kilifi_247   | .....      | .....      | -----     | -----      | .....       | .....       | .....       | .....      |
| PF07_0004_exon2_Kilifi_249   | .....      | .....      | -----     | -----      | .....       | .....       | .....       | .....      |
| PF07_0004_exon2_Kilifi_333   | .....      | .....      | -----     | -----      | .....       | .....       | .....       | .....      |
| PF07_0004_exon2_Kilifi_334   | .....      | .....      | -----     | -----      | .....A..... | .....       | .....       | .....      |
| PF07_0004_exon2_Kilifi_340   | .....      | .....      | -----     | -----      | .....A..... | .....       | .....       | .....      |
| PF07_0004_exon2_Kilifi_343   | .....      | .....      | -----     | -----      | .....       | .....       | .....       | .....      |
| PF07_0004_exon2_Kilifi_344   | .....      | .....      | -----     | -----      | .....A..... | .....       | .....       | .....      |
| PF07_0004_exon2_Kilifi_345   | .....      | .....      | -----     | -----      | .....       | .....       | .....       | .....      |
| PF07_0004_exon2_Kilifi_349   | .....      | .....      | -----     | -----      | .....A..... | .....       | .....       | .....      |
| PF07_0004_exon2_Kilifi_356   | .....      | .....      | -----     | -----      | .....       | .....       | .....       | .....      |
| PF07_0004_exon2_Kilifi_364   | .....      | .....      | -----     | -----      | .....A..... | .....       | .....       | .....      |
| PF07_0004_exon2_Kilifi_328   | .....      | .....      | -----     | -----      | .....A..... | .....       | .....       | .....      |
| PF07_0004_exon2_Kilifi_365   | .....      | .....      | -----     | -----      | .....       | .....       | .....       | .....      |
| PF07_0004_exon2_Kilifi_384   | .....      | .....      | -----     | -----      | .....A..... | .....       | .....       | .....      |
| PF07_0004_exon2_Kilifi_389   | .....      | .....      | -----     | -----      | .....A..... | .....       | .....       | .....      |
| PF07_0004_exon2_Kilifi_406   | .....      | .....      | -----     | -----      | .....A..... | .....       | .....       | .....      |
| PF07_0004_exon2_Kilifi_510   | .....      | .....      | -----     | -----      | .....A..... | .....G..... | .....T..... | .....      |
| PF07_0004_exon2_Kilifi_366   | .....      | .....      | -----     | -----      | .....A..... | .....       | .....       | .....      |
| PF07_0004_exon2_Kilifi_023   | .....      | .....      | -----     | -----      | .....       | .....       | .....       | .....      |
| PF07_0004_exon2_Kilifi_057   | .....      | .....      | -----     | -----      | .....A..... | .....       | .....       | .....      |
| PF07_0004_exon2_Kilifi_191   | .....      | .....      | -----     | -----      | .....A..... | .....       | .....       | .....      |
| PF07_0004_exon2_Kilifi_194   | .....      | .....      | -----     | -----      | .....A..... | .....       | .....       | .....      |
| PF07_0004_exon2_Kilifi_250   | .....      | .....      | -----     | -----      | .....       | .....       | .....       | .....      |
| PF07_0004_exon2_Kilifi_289   | .....      | .....      | -----     | -----      | .....       | .....       | .....       | .....      |
| PF07_0004_exon2_Kilifi_328   | .....      | .....      | -----     | -----      | .....A..... | .....       | .....       | .....      |
| PF07_0004_exon2_Kilifi_348   | .....      | .....      | -----     | -----      | .....       | .....       | .....       | .....      |
| <i>Plasmodium reichenowi</i> | G.....     | .....      | ...ATATAT | ATATAT.T.A | .....       | .....       | .....G..... | .....      |

|                              | 2250       | 2260       | 2270       | 2280       | 2290       | 2300       | 2310       | 2320       |
|------------------------------|------------|------------|------------|------------|------------|------------|------------|------------|
| PF07_0004_3D7_exon2          | TATGACACCT | ATGTTTAAGG | ATTTTATGGA | AACACATCGC | ATAAGTTCTA | AATTAAGTAA | AACTATTCTG | GTAACACTTG |
| PF07_0004_exon2_Kilifi_311   | .....      | .....      | .....      | .....      | .....      | .....      | .....      | .....      |
| PF07_0004_exon2_Kilifi_314   | .....      | .....      | .....      | .....C.G   | .....      | .....      | .....      | .....      |
| PF07_0004_exon2_Kilifi_319   | .....      | .....      | .....      | .....C.G   | .....      | .....      | .....GA..  | .....      |
| PF07_0004_exon2_Kilifi_321   | .....      | .....      | .....      | .....C.G   | .....      | .....      | .....GA..  | .....      |
| PF07_0004_exon2_Kilifi_322   | .....      | .....      | .....      | .....C.G   | .....      | .....      | .....GA..  | .....      |
| PF07_0004_exon2_Kilifi_323   | .....      | .....      | .....      | .....C.G   | .....      | .....      | .....GA..  | .....      |
| PF07_0004_exon2_Kilifi_258   | .....      | .....      | .....      | .....      | .....      | .....      | .....      | .....      |
| PF07_0004_exon2_Kilifi_290   | .....      | .....      | .....      | .....C.G   | .....      | .....      | .....GA..  | .....      |
| PF07_0004_exon2_Kilifi_297   | .....      | .....      | .....      | .....C.G   | .....      | .....      | .....GA..  | .....      |
| PF07_0004_exon2_Kilifi_299   | .....      | .....      | .....      | .....C.G   | .....      | .....      | .....GA..  | .....      |
| PF07_0004_exon2_Kilifi_301   | .....      | .....      | .....      | .....      | .....      | .....      | .....      | .....      |
| PF07_0004_exon2_Kilifi_302   | .....      | .....      | .....      | .....C.G   | .....      | .....      | .....GA..  | .....      |
| PF07_0004_exon2_Kilifi_310   | .....      | .....      | .....      | .....C.G   | .....      | .....      | .....GA..  | .....      |
| PF07_0004_exon2_Kilifi_019   | .....      | .....      | .....      | .....C.G   | .....      | .....      | .....GA..  | .....      |
| PF07_0004_exon2_Kilifi_044   | .....      | .....      | .....      | .....G     | .....      | .....      | .....      | .....      |
| PF07_0004_exon2_Kilifi_093   | .....      | .....      | .....      | .....C.G   | .....      | .....      | .....GA..  | .....      |
| PF07_0004_exon2_Kilifi_097   | .....      | .....      | .....      | .....C.G   | .....      | .....      | .....GA..  | .....      |
| PF07_0004_exon2_Kilifi_201   | .....      | .....      | .....      | .....C.G   | .....      | .....      | .....GA..  | .....      |
| PF07_0004_exon2_Kilifi_235   | .....      | .....      | .....      | .....C.G   | .....      | .....      | .....GA..  | .....      |
| PF07_0004_exon2_Kilifi_245   | .....      | .....      | .....      | .....G     | .....      | .....      | .....      | .....      |
| PF07_0004_exon2_Kilifi_027   | .....      | .....      | .....      | .....      | .....      | .....      | .....      | .....      |
| PF07_0004_exon2_Kilifi_028   | .....      | .....      | .....      | .....C.G   | .....      | .....      | .....GA..  | .....      |
| PF07_0004_exon2_Kilifi_050   | .....      | .....      | .....      | .....      | .....      | .....      | .....      | .....      |
| PF07_0004_exon2_Kilifi_052   | .....      | .....      | .....      | .....C.G   | .....      | .....      | .....GA..  | .....      |
| PF07_0004_exon2_Kilifi_062   | .....      | .....      | .....      | .....C.G   | .....      | .....      | .....GA..  | .....      |
| PF07_0004_exon2_Kilifi_082   | .....      | .....      | .....      | .....      | .....      | .....      | .....      | .....      |
| PF07_0004_exon2_Kilifi_091   | .....      | .....      | .....      | .....C.G   | .....      | .....      | .....GA..  | .....      |
| PF07_0004_exon2_Kilifi_105   | .....      | .....      | .....      | .....C.G   | .....      | .....      | .....GA..  | .....      |
| PF07_0004_exon2_Kilifi_110   | .....      | .....      | .....      | .....      | .....      | .....      | .....      | .....      |
| PF07_0004_exon2_Kilifi_160   | .....      | .....      | .....      | .....C.G   | .....      | .....      | .....GA..  | .....      |
| PF07_0004_exon2_Kilifi_164   | .....      | .....      | .....      | .....C.G   | .....      | .....      | .....GA..  | .....      |
| PF07_0004_exon2_Kilifi_199   | .....      | .....      | .....      | .....      | .....      | .....      | .....      | .....      |
| PF07_0004_exon2_Kilifi_202   | .....      | .....      | .....      | .....C.G   | .....      | .....      | .....GA..  | .....      |
| PF07_0004_exon2_Kilifi_247   | .....      | .....      | .....      | .....C.G   | .....      | .....      | .....GA..  | .....      |
| PF07_0004_exon2_Kilifi_249   | .....      | .....      | .....      | .....C.G   | .....      | .....      | .....GA..  | .....      |
| PF07_0004_exon2_Kilifi_333   | .....      | .....      | .....      | .....      | .....      | .....      | .....      | .....      |
| PF07_0004_exon2_Kilifi_334   | .....      | .....      | .....      | .....C.G   | .....      | .....      | .....GA..  | .....      |
| PF07_0004_exon2_Kilifi_340   | .....      | .....      | .....      | .....      | .....      | .....      | .....      | .....      |
| PF07_0004_exon2_Kilifi_343   | .....      | .....      | .....      | .....C.G   | .....C     | .....      | .....GA..  | .....      |
| PF07_0004_exon2_Kilifi_344   | .....      | .....      | .....      | .....      | .....      | .....      | .....      | .....      |
| PF07_0004_exon2_Kilifi_345   | .....      | .....      | .....      | .....      | .....      | .....      | .....      | .....      |
| PF07_0004_exon2_Kilifi_349   | .....      | .....      | .....      | .....      | .....      | .....      | .....      | .....      |
| PF07_0004_exon2_Kilifi_356   | .....      | .....      | .....      | .....      | .....      | .....      | .....      | .....      |
| PF07_0004_exon2_Kilifi_364   | .....      | .....      | .....      | .....      | .....      | .....      | .....      | .....      |
| PF07_0004_exon2_Kilifi_328   | .....      | .....      | .....      | .....      | .....      | .....      | .....      | .....      |
| PF07_0004_exon2_Kilifi_365   | .....      | .....      | .....      | .....C.G   | .....      | .....      | .....GA..  | .....      |
| PF07_0004_exon2_Kilifi_384   | .....      | .....      | .....      | .....      | .....      | .....      | .....GA..  | .....      |
| PF07_0004_exon2_Kilifi_389   | .....      | .....      | .....      | .....      | .....      | .....      | .....      | .....      |
| PF07_0004_exon2_Kilifi_406   | .....      | .....      | .....      | .....      | .....      | .....      | .....      | .....      |
| PF07_0004_exon2_Kilifi_510   | .....      | .....      | .....      | .....C.G   | .....      | .....      | .....      | .....      |
| PF07_0004_exon2_Kilifi_366   | .....      | .....      | .....      | .....      | .....      | .....      | .....GA..  | .....      |
| PF07_0004_exon2_Kilifi_023   | .....      | .....      | .....      | .....C.G   | .....      | .....      | .....GA..  | .....      |
| PF07_0004_exon2_Kilifi_057   | .....      | .....      | .....      | .....C.G   | .....      | .....      | .....      | .....      |
| PF07_0004_exon2_Kilifi_191   | .....      | .....      | .....      | .....      | .....      | .....      | .....      | .....      |
| PF07_0004_exon2_Kilifi_194   | .....      | .....      | .....      | .....      | .....      | .....      | .....      | .....      |
| PF07_0004_exon2_Kilifi_250   | .....      | .....      | .....      | .....C.G   | .....      | .....      | .....GA..  | .....      |
| PF07_0004_exon2_Kilifi_289   | .....      | .....      | .....      | .....C.G   | .....      | .....      | .....GA..  | .....      |
| PF07_0004_exon2_Kilifi_328   | .....      | .....      | .....      | .....      | .....      | .....      | .....      | .....      |
| PF07_0004_exon2_Kilifi_348   | .....      | .....      | .....      | .....C.G   | .....      | .....      | .....GA..  | .....      |
| <i>Plasmodium reichenowi</i> | ...T...A   | ..A.....   | .....      | ...A.T     | A.....     | T.....     | .....G.    | ...T.....  |



|                              | 2330             | 2340       | 2350           | 2360            | 2370           | 2380            | 2390       | 2400       |
|------------------------------|------------------|------------|----------------|-----------------|----------------|-----------------|------------|------------|
| PF07_0004_3D7_exon2          | GACTAATTGT       | CATCCTTACA | ATAA CCTTAG    | GAATAGTAGG      | CATTGCCGCT     | GGATCTTCAA      | TAGCTACTTT | TTCTACGGCT |
| PF07_0004_exon2_Kilifi_311   | .....            | .....      | .....          | .....           | .....          | .....           | .....      | .....      |
| PF07_0004_exon2_Kilifi_314   | .....            | .....      | .....          | .....           | .....T.....    | .....           | .....      | .....      |
| PF07_0004_exon2_Kilifi_319   | .....            | .....      | ...G..GC.C     | T....G...T..... | T.....T..C.... | G.G.C.A..G..A.. | AA.C.A...  | .....      |
| PF07_0004_exon2_Kilifi_321   | .....            | .....      | .....          | .....           | .....          | .....           | .....      | .....      |
| PF07_0004_exon2_Kilifi_322   | .....            | .....      | .....          | .....           | .....          | .....           | .....      | .....      |
| PF07_0004_exon2_Kilifi_323   | .....            | .....      | .....          | .....           | .....          | .....           | .....      | .....      |
| PF07_0004_exon2_Kilifi_258   | .....            | .....      | .....          | .....           | .....          | .....           | .....      | .....      |
| PF07_0004_exon2_Kilifi_290   | .....            | .....      | .....          | .....           | .....          | .....           | .....      | .....      |
| PF07_0004_exon2_Kilifi_297   | .....            | .....      | .....          | .....           | .....          | .....           | .....      | .....      |
| PF07_0004_exon2_Kilifi_299   | .....            | .....      | .....          | .....           | .....          | .....           | .....      | .....      |
| PF07_0004_exon2_Kilifi_301   | .....            | .....      | .....          | .....           | .....          | .....           | .....      | .....      |
| PF07_0004_exon2_Kilifi_302   | .....            | .....      | .....          | .....           | .....          | .....           | .....      | .....      |
| PF07_0004_exon2_Kilifi_310   | .....            | .....      | .....          | .....           | .....          | .....           | .....      | .....      |
| PF07_0004_exon2_Kilifi_019   | .....            | .....      | .....          | .....           | .....          | .....           | .....      | .....      |
| PF07_0004_exon2_Kilifi_044   | .....            | .....      | .....          | .....           | .....T.....    | .....           | .....      | .....      |
| PF07_0004_exon2_Kilifi_093   | .....            | .....      | .....          | .....           | .....          | .....           | .....      | .....      |
| PF07_0004_exon2_Kilifi_097   | .....            | .....      | .....          | .....           | .....          | .....           | .....      | .....      |
| PF07_0004_exon2_Kilifi_201   | .....            | .....      | .....          | .....           | .....          | .....           | .....      | .....      |
| PF07_0004_exon2_Kilifi_235   | .....            | .....      | .....          | .....           | .....          | .....           | .....      | .....      |
| PF07_0004_exon2_Kilifi_245   | .....            | .....      | .....          | .....           | .....          | .....           | .....      | .....      |
| PF07_0004_exon2_Kilifi_027   | .....            | .....      | .....          | .....           | .....          | .....           | .....      | .....      |
| PF07_0004_exon2_Kilifi_028   | .....            | .....      | .....          | .....           | .....          | .....           | .....      | .....      |
| PF07_0004_exon2_Kilifi_050   | .....            | .....      | .....          | .....           | .....          | .....           | .....      | .....      |
| PF07_0004_exon2_Kilifi_052   | .....            | .....      | .....          | .....           | .....          | .....           | .....      | .....      |
| PF07_0004_exon2_Kilifi_062   | .....            | .....      | .....          | .....           | .....          | .....           | .....      | .....      |
| PF07_0004_exon2_Kilifi_082   | .....            | .....      | .....          | .....           | .....          | .....           | .....      | .....      |
| PF07_0004_exon2_Kilifi_091   | .....            | .....      | .....          | .....           | .....          | .....           | .....      | .....      |
| PF07_0004_exon2_Kilifi_105   | .....            | .....      | .....          | .....           | .....          | .....           | .....      | .....      |
| PF07_0004_exon2_Kilifi_110   | .....            | .....      | .....          | .....           | .....          | .....           | .....      | .....      |
| PF07_0004_exon2_Kilifi_160   | .....            | .....      | .....          | .....           | .....          | .....           | .....      | .....      |
| PF07_0004_exon2_Kilifi_164   | .....            | .....      | .....          | .....           | .....          | .....           | .....      | .....      |
| PF07_0004_exon2_Kilifi_199   | .....            | .....      | .....          | .....           | .....          | .....           | .....      | .....      |
| PF07_0004_exon2_Kilifi_202   | .....            | .....      | .....          | .....           | .....          | .....           | .....      | .....      |
| PF07_0004_exon2_Kilifi_247   | .....            | .....      | .....          | .....           | .....          | .....           | .....      | .....      |
| PF07_0004_exon2_Kilifi_249   | .....            | .....      | .....          | .....           | .....          | .....           | .....      | .....      |
| PF07_0004_exon2_Kilifi_333   | .....            | .....      | .....          | .....           | .....          | .....           | .....      | .....      |
| PF07_0004_exon2_Kilifi_334   | .....            | .....      | ...G..GC.C     | T....G...T..... | T.....T..C.... | G.G.C.A..G..A.. | AA.C.A...  | .....      |
| PF07_0004_exon2_Kilifi_340   | .....            | .....      | .....          | .....           | .....          | .....           | .....      | .....      |
| PF07_0004_exon2_Kilifi_343   | .....            | .....      | .....          | .....           | .....          | .....           | .....      | .....      |
| PF07_0004_exon2_Kilifi_344   | .....            | .....      | .....          | .....           | .....          | .....           | .....      | .....      |
| PF07_0004_exon2_Kilifi_345   | .....            | .....      | .....          | .....           | .....          | .....           | .....      | .....      |
| PF07_0004_exon2_Kilifi_349   | .....            | .....      | .....          | .....           | .....          | .....           | .....      | .....      |
| PF07_0004_exon2_Kilifi_356   | .....            | .....      | .....          | .....           | .....          | .....           | .....      | .....      |
| PF07_0004_exon2_Kilifi_364   | .....            | .....      | .....          | .....           | .....          | .....           | .....      | .....      |
| PF07_0004_exon2_Kilifi_328   | .....            | .....      | .....          | .....           | .....          | .....           | .....      | .....      |
| PF07_0004_exon2_Kilifi_365   | .....            | .....      | ...G..GC.C     | T....G...T..... | T.....T..C.... | G.G.C.A..G..A.. | AA.C.A...  | .....      |
| PF07_0004_exon2_Kilifi_384   | .....            | .....      | ...G..GC.C     | T....G...T..... | T.....T..C.... | G.G.C.A..G..A.. | AA.C.A...  | .....      |
| PF07_0004_exon2_Kilifi_389   | .....            | .....      | .....          | .....           | .....          | .....           | .....      | .....      |
| PF07_0004_exon2_Kilifi_406   | .....            | .....      | .....          | .....           | .....          | .....           | .....      | .....      |
| PF07_0004_exon2_Kilifi_510   | ..T....A.G.....  | ...G.....  | T....G...T.... | AT.....         | TT             | GT.G.CTGG.      | G.G.GGT--- | .....      |
| PF07_0004_exon2_Kilifi_366   | .....            | .....      | .....          | .....           | .....          | .....           | .....      | .....      |
| PF07_0004_exon2_Kilifi_023   | .....            | .....      | .....          | .....           | .....          | .....           | .....      | .....      |
| PF07_0004_exon2_Kilifi_057   | ..T....A.G.....  | ...G.....  | T....G...T.... | AT.....         | TT             | GT.G.CTGG.      | G.G.GGT--- | .....      |
| PF07_0004_exon2_Kilifi_191   | .....            | .....      | .....          | .....           | .....          | .....           | .....      | .....      |
| PF07_0004_exon2_Kilifi_194   | .....            | .....      | .....          | .....           | .....          | .....           | .....      | .....      |
| PF07_0004_exon2_Kilifi_250   | .....            | .....      | .....          | .....           | .....          | .....           | .....      | .....      |
| PF07_0004_exon2_Kilifi_289   | .....            | .....      | .....          | .....           | .....          | .....           | .....      | .....      |
| PF07_0004_exon2_Kilifi_328   | .....            | .....      | .....          | .....           | .....          | .....           | .....      | .....      |
| PF07_0004_exon2_Kilifi_348   | .....            | .....      | .....          | .....           | .....          | .....           | .....      | .....      |
| <i>Plasmodium reichenowi</i> | .....A.G..A..... | ...G.T.C.C | T....C...T.... | A.ATG.....      | TT             | GTAG.TTGG.      | ..G.GGT--- | .....      |



|                              | 2490       | 2500       | 2510       | 2520       | 2530       | 2540      | 2550       | 2560      |
|------------------------------|------------|------------|------------|------------|------------|-----------|------------|-----------|
| PF07_0004_3D7_exon2          | AGCATTTATA | GAAAAATATT | TTAAAATTAA | AGGCATAGAA | TATAACAACA | CGAATGTAA | TAATATAAAT | TCATTTCAG |
| PF07_0004_exon2_Kilifi_311   |            |            |            |            |            |           |            |           |
| PF07_0004_exon2_Kilifi_314   |            |            |            |            |            |           |            |           |
| PF07_0004_exon2_Kilifi_319   |            |            |            |            | G          | C         | G          |           |
| PF07_0004_exon2_Kilifi_321   |            |            |            |            | G          |           |            |           |
| PF07_0004_exon2_Kilifi_322   |            |            |            |            | G          |           |            |           |
| PF07_0004_exon2_Kilifi_323   |            |            |            |            | G          |           |            |           |
| PF07_0004_exon2_Kilifi_258   |            |            |            |            | G          |           |            |           |
| PF07_0004_exon2_Kilifi_290   |            |            |            |            | G          |           | C          |           |
| PF07_0004_exon2_Kilifi_297   |            |            |            |            | G          |           |            |           |
| PF07_0004_exon2_Kilifi_299   |            |            |            |            | G          |           |            |           |
| PF07_0004_exon2_Kilifi_301   |            |            |            |            |            |           |            |           |
| PF07_0004_exon2_Kilifi_302   |            |            |            |            | G          |           |            |           |
| PF07_0004_exon2_Kilifi_310   |            |            |            |            | G          |           |            |           |
| PF07_0004_exon2_Kilifi_019   |            |            |            |            |            |           |            |           |
| PF07_0004_exon2_Kilifi_044   |            |            |            |            |            |           |            |           |
| PF07_0004_exon2_Kilifi_093   |            |            |            |            | G          |           |            |           |
| PF07_0004_exon2_Kilifi_097   |            |            |            |            | G          |           |            |           |
| PF07_0004_exon2_Kilifi_201   |            |            |            |            | G          |           |            |           |
| PF07_0004_exon2_Kilifi_235   |            |            |            |            | G          |           |            |           |
| PF07_0004_exon2_Kilifi_245   |            |            |            |            | G          |           | G          |           |
| PF07_0004_exon2_Kilifi_027   |            |            |            |            |            |           |            |           |
| PF07_0004_exon2_Kilifi_028   |            |            |            |            | G          |           |            |           |
| PF07_0004_exon2_Kilifi_050   |            |            |            |            |            |           |            |           |
| PF07_0004_exon2_Kilifi_052   |            |            |            |            |            |           |            |           |
| PF07_0004_exon2_Kilifi_062   |            |            |            |            |            |           |            |           |
| PF07_0004_exon2_Kilifi_082   |            |            |            |            |            |           |            |           |
| PF07_0004_exon2_Kilifi_091   |            |            |            |            |            |           |            |           |
| PF07_0004_exon2_Kilifi_105   |            |            |            |            |            |           |            |           |
| PF07_0004_exon2_Kilifi_110   |            |            |            |            |            |           |            |           |
| PF07_0004_exon2_Kilifi_160   |            |            |            |            | G          |           |            |           |
| PF07_0004_exon2_Kilifi_164   |            |            |            |            |            |           |            |           |
| PF07_0004_exon2_Kilifi_199   |            |            |            |            |            |           |            |           |
| PF07_0004_exon2_Kilifi_202   |            |            |            |            | G          |           |            |           |
| PF07_0004_exon2_Kilifi_247   |            |            |            |            |            |           |            |           |
| PF07_0004_exon2_Kilifi_249   |            |            |            |            |            |           |            |           |
| PF07_0004_exon2_Kilifi_333   |            |            |            |            |            |           |            |           |
| PF07_0004_exon2_Kilifi_334   |            |            |            |            | G          | C         | G          |           |
| PF07_0004_exon2_Kilifi_340   |            |            |            |            |            |           |            |           |
| PF07_0004_exon2_Kilifi_343   |            |            |            | G          | G          |           |            |           |
| PF07_0004_exon2_Kilifi_344   |            |            |            |            |            |           |            |           |
| PF07_0004_exon2_Kilifi_345   |            |            |            |            |            |           |            |           |
| PF07_0004_exon2_Kilifi_349   |            |            |            |            |            |           |            |           |
| PF07_0004_exon2_Kilifi_356   |            |            |            |            |            |           |            |           |
| PF07_0004_exon2_Kilifi_364   |            |            | A          |            | G          |           |            |           |
| PF07_0004_exon2_Kilifi_328   |            |            |            |            |            |           |            |           |
| PF07_0004_exon2_Kilifi_365   |            |            |            |            | G          | C         | G          |           |
| PF07_0004_exon2_Kilifi_384   |            |            |            |            | G          | C         | G          |           |
| PF07_0004_exon2_Kilifi_389   |            |            |            |            |            |           |            |           |
| PF07_0004_exon2_Kilifi_406   |            |            |            |            |            |           |            |           |
| PF07_0004_exon2_Kilifi_510   | A          |            |            |            |            |           |            |           |
| PF07_0004_exon2_Kilifi_366   |            |            |            |            | G          |           |            |           |
| PF07_0004_exon2_Kilifi_023   |            |            |            |            | G          |           |            |           |
| PF07_0004_exon2_Kilifi_057   | A          |            |            |            |            |           |            |           |
| PF07_0004_exon2_Kilifi_191   |            |            |            |            |            |           |            |           |
| PF07_0004_exon2_Kilifi_194   |            |            |            |            |            |           |            |           |
| PF07_0004_exon2_Kilifi_250   |            |            |            |            | G          |           |            |           |
| PF07_0004_exon2_Kilifi_289   |            |            |            |            | G          |           |            |           |
| PF07_0004_exon2_Kilifi_328   |            |            |            |            |            |           |            |           |
| PF07_0004_exon2_Kilifi_348   |            |            |            |            |            |           |            |           |
| <i>Plasmodium reichenowi</i> | T          | A          |            | AG         | A          | G         | C          | AT        |

|                              | 2570       | 2580       | 2590        | 2600       | 2610       | 2620           | 2630           | 2640       |
|------------------------------|------------|------------|-------------|------------|------------|----------------|----------------|------------|
| PF07_0004_3D7_exon2          | GGGTAGTAAA | AAATATATGG | AATAAAAAAA  | ATAGCACAAA | GTTTAACTCA | AATGAAAAAA     | CTGTAAATGA     | GAATCGCAC  |
| PF07_0004_exon2_Kilifi_311   | .....      | .....      | .....       | .....      | .....      | .....          | .....          | .....      |
| PF07_0004_exon2_Kilifi_314   | .....      | .....      | .....       | .....      | .....      | .....          | .....          | .....      |
| PF07_0004_exon2_Kilifi_319   | .....      | .....      | .....G...G. | .....      | .....      | .....          | .....          | .....      |
| PF07_0004_exon2_Kilifi_321   | .....      | .....      | .....       | .....      | .....      | .....          | .....          | .....      |
| PF07_0004_exon2_Kilifi_322   | .....      | .....      | .....G....  | .....      | .....      | .....          | .....          | .....      |
| PF07_0004_exon2_Kilifi_323   | .....      | .....      | .....G....  | .....      | .....      | .....          | .....          | .....      |
| PF07_0004_exon2_Kilifi_258   | .....      | .....      | .....G....  | .....      | .....      | .....          | .....          | .....      |
| PF07_0004_exon2_Kilifi_290   | .....      | .....      | .....       | .....      | .....      | .....          | .....          | .....      |
| PF07_0004_exon2_Kilifi_297   | .....      | .....      | .....G....  | .....      | .....      | .....          | .....          | .....      |
| PF07_0004_exon2_Kilifi_299   | .....      | .....      | .....G....  | .....      | .....      | .....          | .....          | .....      |
| PF07_0004_exon2_Kilifi_301   | .....      | .....      | .....       | .....      | .....      | .....          | .....          | .....      |
| PF07_0004_exon2_Kilifi_302   | .....      | .....      | .....G....  | .....      | .....      | .....          | .....          | .....      |
| PF07_0004_exon2_Kilifi_310   | .....      | .....      | .....G....  | .....      | .....      | .....          | .....          | .....      |
| PF07_0004_exon2_Kilifi_019   | .....      | .....      | .....       | .....      | .....      | .....          | .....          | .....      |
| PF07_0004_exon2_Kilifi_044   | .....      | .....      | .....       | .....      | .....      | .....          | .....          | .....      |
| PF07_0004_exon2_Kilifi_093   | .....      | .....      | .....G....  | .....      | .....      | .....          | .....          | .....      |
| PF07_0004_exon2_Kilifi_097   | .....      | .....      | .....G....  | .....      | .....      | .....          | .....          | .....      |
| PF07_0004_exon2_Kilifi_201   | .....      | .....      | .....G....  | .....      | .....      | .....          | .....          | .....      |
| PF07_0004_exon2_Kilifi_235   | .....      | .....      | .....G....  | .....      | .....      | .....          | .....          | .....      |
| PF07_0004_exon2_Kilifi_245   | .....      | .....      | .....G...G. | .....      | .....      | .....          | .....          | .....      |
| PF07_0004_exon2_Kilifi_027   | .....      | .....      | .....       | .....      | .....      | .....          | .....          | .....      |
| PF07_0004_exon2_Kilifi_028   | .....      | .....      | .....G....  | .....      | .....      | .....          | .....          | .....      |
| PF07_0004_exon2_Kilifi_050   | .....      | .....      | .....       | .....      | .....      | .....          | .....          | .....      |
| PF07_0004_exon2_Kilifi_052   | .....      | .....      | .....G....  | .....      | .....      | .....          | .....          | .....      |
| PF07_0004_exon2_Kilifi_062   | .....      | .....      | .....       | .....      | .....      | .....          | .....          | .....      |
| PF07_0004_exon2_Kilifi_082   | .....      | .....      | .....       | .....      | .....      | .....          | .....          | .....      |
| PF07_0004_exon2_Kilifi_091   | .....      | .....      | .....G....  | .....      | .....      | .....          | .....          | .....      |
| PF07_0004_exon2_Kilifi_105   | .....      | .....      | .....G....  | .....      | .....      | .....          | .....          | .....      |
| PF07_0004_exon2_Kilifi_110   | .....      | .....      | .....       | .....      | .....      | .....          | .....          | .....      |
| PF07_0004_exon2_Kilifi_160   | .....      | .....      | .....G....  | .....      | .....      | .....          | .....          | .....      |
| PF07_0004_exon2_Kilifi_164   | .....      | .....      | .....G....  | .....      | .....      | .....          | .....          | .....      |
| PF07_0004_exon2_Kilifi_199   | .....      | .....      | .....       | .....      | .....      | .....          | .....          | .....      |
| PF07_0004_exon2_Kilifi_202   | .....      | .....      | .....G....  | .....      | .....      | .....          | .....          | .....      |
| PF07_0004_exon2_Kilifi_247   | .....      | .....      | .....       | .....      | .....      | .....          | .....          | .....      |
| PF07_0004_exon2_Kilifi_249   | .....      | .....      | .....       | .....      | .....      | .....          | .....          | .....      |
| PF07_0004_exon2_Kilifi_333   | .....      | .....      | .....       | .....      | .....      | .....          | .....          | .....      |
| PF07_0004_exon2_Kilifi_334   | .....      | .....      | .....G...G. | .....      | .....      | .....          | .....          | .....      |
| PF07_0004_exon2_Kilifi_340   | .....      | .....      | .....       | .....      | .....      | .....          | .....          | .....      |
| PF07_0004_exon2_Kilifi_343   | .....      | .....      | .....G....  | .....      | .....      | .....          | .....          | .....      |
| PF07_0004_exon2_Kilifi_344   | .....      | .....      | .....       | .....      | .....      | .....          | .....          | .....      |
| PF07_0004_exon2_Kilifi_345   | .....      | .....      | .....       | .....      | .....      | .....          | .....          | .....      |
| PF07_0004_exon2_Kilifi_349   | .....      | .....      | .....G...G. | .....      | .....      | .....          | .....          | .....      |
| PF07_0004_exon2_Kilifi_356   | .....      | .....      | .....       | .....      | .....      | .....          | .....          | .....      |
| PF07_0004_exon2_Kilifi_364   | .....      | .....      | .....G....  | .....      | .....      | .....          | .....          | .....      |
| PF07_0004_exon2_Kilifi_328   | .....      | .....      | .....       | .....      | .....      | .....          | .....          | .....      |
| PF07_0004_exon2_Kilifi_365   | .....      | .....      | .....G...G. | .....      | .....      | .....          | .....          | .....      |
| PF07_0004_exon2_Kilifi_384   | .....      | .....      | .....G...G. | .....      | .....      | .....          | .....          | .....      |
| PF07_0004_exon2_Kilifi_389   | .....      | .....      | .....       | .....      | .....      | .....          | .....          | .....      |
| PF07_0004_exon2_Kilifi_406   | .....      | .....      | .....       | .....      | .....      | .....          | .....          | .....      |
| PF07_0004_exon2_Kilifi_510   | .....      | .....      | .....       | .....      | .....      | .....          | .....          | .....      |
| PF07_0004_exon2_Kilifi_366   | .....      | .....      | .....G....  | .....      | .....      | .....          | .....          | .....      |
| PF07_0004_exon2_Kilifi_023   | .....      | .....      | .....       | .....      | .....      | .....          | .....          | .....      |
| PF07_0004_exon2_Kilifi_057   | .....      | .....      | .....       | .....      | .....      | .....          | .....          | .....      |
| PF07_0004_exon2_Kilifi_191   | .....      | .....      | .....       | .....      | .....      | .....          | .....          | .....      |
| PF07_0004_exon2_Kilifi_194   | .....      | .....      | .....       | .....      | .....      | .....          | .....          | .....      |
| PF07_0004_exon2_Kilifi_250   | .....      | .....      | .....G....  | .....      | .....      | .....          | .....          | .....      |
| PF07_0004_exon2_Kilifi_289   | .....      | .....      | .....G....  | .....      | .....      | .....          | .....          | .....      |
| PF07_0004_exon2_Kilifi_328   | .....      | .....      | .....       | .....      | .....      | .....          | .....          | .....      |
| PF07_0004_exon2_Kilifi_348   | .....      | .....G.... | .....T....  | .....A...T | .....TGA.  | .....TGA.G.... | .....TG....A.. | .....TC..A |
| <i>Plasmodium reichenowi</i> | .....G.... | .....A.... | .....T....  | .....A...T | .....TGA.  | .....TGA.G.... | .....TG....A.. | .....TC..A |

|                              | 2650       | 2660       | 2670       | 2680       | 2690       | 2700       | 2710           | 2720        |
|------------------------------|------------|------------|------------|------------|------------|------------|----------------|-------------|
| PF07_0004_3D7_exon2          | CAAAAAAATA | TAAGCGGAAA | AACACTTCCA | ACAAACATTA | CAAGTAAGGC | ACCACAGAAT | AATGTACAAA     | ACAAACCA--  |
| PF07_0004_exon2_Kilifi_311   | .....      | .....      | .....      | .A..T....  | .....      | .....      | .....          | .....A.CC   |
| PF07_0004_exon2_Kilifi_314   | .....      | .....      | .....      | .A..T....  | .....      | .....      | .....          | .....A.CC   |
| PF07_0004_exon2_Kilifi_319   | .....      | .....      | .....C.... | .A..T....  | .....      | .....C.... | .....          | .....G.A.CC |
| PF07_0004_exon2_Kilifi_321   | .....      | .....      | .....      | .A..T....  | .....      | .....      | .....          | .....A.CC   |
| PF07_0004_exon2_Kilifi_322   | .....      | .....      | .....C.... | .....      | .....      | .....      | .....          | .....--     |
| PF07_0004_exon2_Kilifi_323   | .....      | .....      | .....      | .A..T....  | .....      | .....      | .....          | .....A.CC   |
| PF07_0004_exon2_Kilifi_258   | .....      | .....      | .....C.... | .....      | .....      | .....      | .....          | .....--CC   |
| PF07_0004_exon2_Kilifi_290   | .....      | .....      | .....C.... | .A.....    | .....      | .....      | .....          | .....CC     |
| PF07_0004_exon2_Kilifi_297   | .....      | .....      | .....C.... | .....      | .....      | .....      | .....C..C..T-- | .....       |
| PF07_0004_exon2_Kilifi_299   | .....      | .....      | .....C.... | .....      | .....      | .....      | .....          | .....--     |
| PF07_0004_exon2_Kilifi_301   | .....      | .....      | .....      | .A..T....  | .....      | .....      | .....          | .....A.CC   |
| PF07_0004_exon2_Kilifi_302   | .....      | .....      | .....C.... | .....      | .....      | .....      | .....          | .....--     |
| PF07_0004_exon2_Kilifi_310   | .....      | .....      | .....C.... | .....      | .....      | .....      | .....          | .....--CC   |
| PF07_0004_exon2_Kilifi_019   | .....      | .....      | .....      | .A..T....  | .....      | .....      | .....          | .....A.CC   |
| PF07_0004_exon2_Kilifi_044   | .....      | .....      | .....      | .A..T....  | .....      | .....      | .....          | .....A.CC   |
| PF07_0004_exon2_Kilifi_093   | .....      | .....      | .....C.... | .....      | .....      | .....      | .....          | .....--CC   |
| PF07_0004_exon2_Kilifi_097   | .....      | .....      | .....C.... | .....      | .....      | .....      | .....          | .....--     |
| PF07_0004_exon2_Kilifi_201   | .....      | .....      | .....C.... | .....      | .....      | .....      | .....          | .....--     |
| PF07_0004_exon2_Kilifi_235   | .....      | .....      | .....C.... | .....      | .....      | .....      | .....          | .....--     |
| PF07_0004_exon2_Kilifi_245   | .....      | .....      | .....C.... | .A.....    | .....      | .....C.... | .....          | .....G.A.CC |
| PF07_0004_exon2_Kilifi_027   | .....      | .....      | .....      | .A..T....  | .....      | .....      | .....          | .....A.CC   |
| PF07_0004_exon2_Kilifi_028   | .....      | .....      | .....C.... | .....      | .....      | .....      | .....          | .....--     |
| PF07_0004_exon2_Kilifi_050   | .....      | .....      | .....      | .A..T....  | .....      | .....      | .....          | .....A.CC   |
| PF07_0004_exon2_Kilifi_052   | .....      | .....      | .....C.... | .....      | .....      | .....      | .....          | .....--     |
| PF07_0004_exon2_Kilifi_062   | .....      | .....      | .....      | .A..T....  | .....      | .....      | .....          | .....A.CC   |
| PF07_0004_exon2_Kilifi_082   | .....      | .....      | .....      | .A..T....  | .....      | .....      | .....          | .....A.CC   |
| PF07_0004_exon2_Kilifi_091   | .....      | .....      | .....C.... | .....      | .....      | .....      | .....          | .....--     |
| PF07_0004_exon2_Kilifi_105   | .....      | .....      | .....C.... | .....      | .....      | .....      | .....          | .....--     |
| PF07_0004_exon2_Kilifi_110   | .....      | .....      | .....C.... | .....      | .....      | .....      | .....          | .....--     |
| PF07_0004_exon2_Kilifi_160   | .....      | .....      | .....      | .A..T....  | .....      | .....      | .....          | .....A.CC   |
| PF07_0004_exon2_Kilifi_164   | .....      | .....      | .....C.... | .....      | .....      | .....      | .....          | .....--     |
| PF07_0004_exon2_Kilifi_199   | .....      | .....      | .....      | .A.....    | .....      | .....      | .....          | .....A.CC   |
| PF07_0004_exon2_Kilifi_202   | .....      | .....      | .....C.... | .....      | .....      | .....      | .....          | .....--     |
| PF07_0004_exon2_Kilifi_247   | .....      | .....      | .....      | .A..T....  | .....      | .....      | .....          | .....A.CC   |
| PF07_0004_exon2_Kilifi_249   | .....      | .....      | .....      | .A..T....  | .....      | .....      | .....          | .....A.CC   |
| PF07_0004_exon2_Kilifi_333   | .....      | .....      | .....      | .A..T....  | .....      | .....      | .....          | .....A.CC   |
| PF07_0004_exon2_Kilifi_334   | .....      | .....      | .....C.... | .A..T....  | .....      | .....C.... | .....          | .....G.A.CC |
| PF07_0004_exon2_Kilifi_340   | .....      | .....      | .....      | .A..T....  | .....      | .....      | .....          | .....A.CC   |
| PF07_0004_exon2_Kilifi_343   | .....      | .....      | .....C.... | .....      | .....      | .....      | .....          | .....--     |
| PF07_0004_exon2_Kilifi_344   | .....      | .....      | .....      | .A..T....  | .....      | .....      | .....          | .....A.CC   |
| PF07_0004_exon2_Kilifi_345   | .....      | .....      | .....      | .....      | .....      | .....      | .....          | .....--CC   |
| PF07_0004_exon2_Kilifi_349   | .....      | .....      | .....C.... | .A.....    | .....      | .....C.... | .....          | .....G.A.CC |
| PF07_0004_exon2_Kilifi_356   | .....      | .....      | .....C.... | .....      | .....      | .....      | .....          | .....A.CC   |
| PF07_0004_exon2_Kilifi_364   | .....      | .....      | .....C.... | .A.....    | .....      | .....      | .....          | .....A.CC   |
| PF07_0004_exon2_Kilifi_328   | .....      | .....      | .....      | .A..T....  | .....      | .....      | .....          | .....A.CC   |
| PF07_0004_exon2_Kilifi_365   | .....      | .....      | .....C.... | .A.....    | .....      | .....C.... | .....          | .....G.A.CC |
| PF07_0004_exon2_Kilifi_384   | .....      | .....      | .....C.... | .A.....    | .....      | .....C.... | .....          | .....G.A.CC |
| PF07_0004_exon2_Kilifi_389   | .....      | .....      | .....C.... | .....      | .....      | .....      | .....          | .....--     |
| PF07_0004_exon2_Kilifi_406   | .....      | .....      | .....      | .A..T....  | .....      | .....      | .....          | .....A.CC   |
| PF07_0004_exon2_Kilifi_510   | .....      | .....      | .....C.... | .....      | .....      | .....      | .....          | .....--     |
| PF07_0004_exon2_Kilifi_366   | .....      | .....      | .....C.... | .....      | .....      | .....      | .....          | .....A.CC   |
| PF07_0004_exon2_Kilifi_023   | .....      | .....      | .....      | .A..T....  | .....      | .....      | .....          | .....A.CC   |
| PF07_0004_exon2_Kilifi_057   | .....      | .....      | .....      | .A.....    | .....      | .....      | .....          | .....A.CC   |
| PF07_0004_exon2_Kilifi_191   | .....      | .....      | .....C.... | .....      | .....      | .....      | .....          | .....A.CC   |
| PF07_0004_exon2_Kilifi_194   | .....      | .....      | .....C.... | .....      | .....      | .....      | .....          | .....--     |
| PF07_0004_exon2_Kilifi_250   | .....      | .....      | .....C.... | .....      | .....      | .....      | .....          | .....--     |
| PF07_0004_exon2_Kilifi_289   | .....      | .....      | .....C.... | .....      | .....      | .....      | .....          | .....--     |
| PF07_0004_exon2_Kilifi_328   | .....      | .....      | .....      | .A..T....  | .....      | .....      | .....          | .....A.CC   |
| PF07_0004_exon2_Kilifi_348   | .....      | .....      | .....      | .A..T....  | .....      | .....      | .....          | .....A.CC   |
| <i>Plasmodium reichenowi</i> | AC.GG..... | .G.A.....  | .T..CC..G  | CA..T....  | .T..A..    | .T.....A   | T..A.....      | .G..A.--    |

|                              | 2730       | 2740       | 2750       | 2760       | 2770       | 2780       | 2790           | 2800           |
|------------------------------|------------|------------|------------|------------|------------|------------|----------------|----------------|
| PF07_0004_3D7_exon2          | .... ....  | .... ....  | .... ....  | .... ....  | .... ....  | .... ....  | .... ....      | .... ....      |
|                              | -CGACAGAAT | ATACAAAACC | AACATGAAAA | AAATGTACAA | AGTAAAGCAC | CTCAACAAAA | TATACAAAAA     | AGGGCACCAC     |
| PF07_0004_exon2_Kilifi_311   | T.A..A..   | .A.....    | .....C...  | .....A...  | .....      | .....      | .....          | .....          |
| PF07_0004_exon2_Kilifi_314   | T.A..A..   | .A.....    | .....C...  | .....A...  | .....      | .....      | .....          | .....          |
| PF07_0004_exon2_Kilifi_319   | A.A..A..   | G..G..T.   | .....C...  | .....A...  | T.....     | .....      | .....TT..T.    | .....          |
| PF07_0004_exon2_Kilifi_321   | T.A..A..   | .A.....    | .....C...  | .....A...  | .....      | .....      | .....          | .....          |
| PF07_0004_exon2_Kilifi_322   | -.....     | .....      | .....      | .....      | .....      | .....      | .....          | .....          |
| PF07_0004_exon2_Kilifi_323   | T.A..A..   | .A.....    | .....C...  | .....A...  | .....      | .....      | .....          | .....          |
| PF07_0004_exon2_Kilifi_258   | A.....     | .....      | .....      | .....      | .....      | .....      | .....          | .....          |
| PF07_0004_exon2_Kilifi_290   | T.A..T..   | .....      | .....C...  | .....A...  | .....      | .....      | .....          | .....          |
| PF07_0004_exon2_Kilifi_297   | -.....     | .....      | .....      | .....      | .....      | .....      | .....          | .....          |
| PF07_0004_exon2_Kilifi_299   | -.....     | .....      | .....      | .....      | .....      | .....      | .....          | .....          |
| PF07_0004_exon2_Kilifi_301   | T.A..A..   | .A.....    | .....C...  | .....A...  | .....      | .....      | .....          | .....          |
| PF07_0004_exon2_Kilifi_302   | -.....     | .....      | .....      | .....      | .....      | .....      | .....          | .....          |
| PF07_0004_exon2_Kilifi_310   | A.....     | .....      | .....      | .....      | .....      | .....      | .....          | .....          |
| PF07_0004_exon2_Kilifi_019   | T.A..A..   | .A.....    | .....C...  | .....A...  | .....      | .....      | .....          | .....          |
| PF07_0004_exon2_Kilifi_044   | T.A..A..   | .A.....    | .....C...  | .....A...  | .....      | .....      | .....          | .....          |
| PF07_0004_exon2_Kilifi_093   | A.....     | .....      | .....      | .....      | .....      | .....      | .....          | .....          |
| PF07_0004_exon2_Kilifi_097   | -.....     | .....      | .....      | .....      | .....      | .....      | .....          | .....          |
| PF07_0004_exon2_Kilifi_201   | -.....     | .....      | .....      | .....      | .....      | .....      | .....          | .....          |
| PF07_0004_exon2_Kilifi_235   | -.....     | .....      | .....      | .....      | .....      | .....      | .....          | .....          |
| PF07_0004_exon2_Kilifi_245   | A.A..A..   | G..G..T.   | .....C...  | .....A...  | .....      | .....      | .....A...      | .....          |
| PF07_0004_exon2_Kilifi_027   | T.A..A..   | .A.....    | .....C...  | .....A...  | .....      | .....      | .....          | .....          |
| PF07_0004_exon2_Kilifi_028   | -.....     | .....      | .....      | .....      | .....      | .....      | .....          | .....          |
| PF07_0004_exon2_Kilifi_050   | T.A..A..   | .A.....    | .....C...  | .....A...  | .....      | .....      | .....          | .....          |
| PF07_0004_exon2_Kilifi_052   | -.....     | .....      | .....      | .....      | .....      | .....      | .....          | .....          |
| PF07_0004_exon2_Kilifi_062   | T.A..A..   | .A.....    | .....C...  | .....A...  | .....      | .....      | .....          | .....          |
| PF07_0004_exon2_Kilifi_082   | T.A..A..   | .A.....    | .....C...  | .....A...  | .....      | .....      | .....          | .....          |
| PF07_0004_exon2_Kilifi_091   | -.....     | .....      | .....      | .....      | .....      | .....      | .....          | .....          |
| PF07_0004_exon2_Kilifi_105   | -.....     | .....      | .....      | .....      | .....      | .....      | .....          | .....          |
| PF07_0004_exon2_Kilifi_110   | -.....     | .....      | .....      | .....      | .....      | .....      | .....          | .....          |
| PF07_0004_exon2_Kilifi_160   | T.A..A..   | .A.....    | .....C...  | .....A...  | .....      | .....      | .....          | .....          |
| PF07_0004_exon2_Kilifi_164   | -.....     | .....      | .....      | .....      | .....      | .....      | .....          | .....          |
| PF07_0004_exon2_Kilifi_199   | T.A..A..   | .....      | .....C...  | .....A...  | .....      | .....      | .....          | .....          |
| PF07_0004_exon2_Kilifi_202   | -.....     | .....      | .....      | .....      | .....      | .....      | .....          | .....          |
| PF07_0004_exon2_Kilifi_247   | T.A..A..   | .A.....    | .....C...  | .....A...  | .....      | .....      | .....          | .....          |
| PF07_0004_exon2_Kilifi_249   | T.A..A..   | .A.....    | .....C...  | .....A...  | .....      | .....      | .....          | .....          |
| PF07_0004_exon2_Kilifi_333   | T.A..A..   | .A.....    | .....C...  | .....A...  | .....      | .....      | .....          | .....          |
| PF07_0004_exon2_Kilifi_334   | A.A..A..   | G..G..T.   | .....C...  | .....A...  | .....      | .....      | .....          | .....          |
| PF07_0004_exon2_Kilifi_340   | T.A..A..   | .A.....    | .....C...  | .....A...  | .....      | .....      | .....          | .....          |
| PF07_0004_exon2_Kilifi_343   | -.....     | .....      | .....      | .....      | .....      | .....      | .....          | .....          |
| PF07_0004_exon2_Kilifi_344   | T.A..A..   | .A.....    | .....C...  | .....A...  | .....      | .....      | .....          | .....          |
| PF07_0004_exon2_Kilifi_345   | A.....     | .....      | .....      | .....      | .....      | .....      | .....          | .....          |
| PF07_0004_exon2_Kilifi_349   | A.A..A..   | G..G..T.   | .....C...  | .....A...  | T.....     | .....      | .....TT..T.    | .....          |
| PF07_0004_exon2_Kilifi_356   | T.A..A..   | .A.....    | .....C...  | .....A...  | .....      | .....      | .....          | .....          |
| PF07_0004_exon2_Kilifi_364   | A.A.--..   | .....      | .....C...  | .....A...  | .....      | .....      | .....          | .....          |
| PF07_0004_exon2_Kilifi_328   | T.A..A..   | .A.....    | .....C...  | .....A...  | .....      | .....      | .....          | .....          |
| PF07_0004_exon2_Kilifi_365   | A.A..A..   | G..G..T.   | .....C...  | .....A...  | T.....     | .....      | .....TT..T.    | .....          |
| PF07_0004_exon2_Kilifi_384   | A.A..A..   | G..G..T.   | .....C...  | .....A...  | T.....     | .....      | .....TT..T.    | .....          |
| PF07_0004_exon2_Kilifi_389   | -.....     | .....      | .....      | .....      | .....      | .....      | .....          | .....          |
| PF07_0004_exon2_Kilifi_406   | T.A..A..   | .A.....    | .....C...  | .....A...  | .....      | .....      | .....          | .....          |
| PF07_0004_exon2_Kilifi_510   | -.....     | .....      | .....      | .....      | .....      | .....      | .....          | .....          |
| PF07_0004_exon2_Kilifi_366   | T.A..A..   | .....      | .....C...  | .....A...  | .....      | .....      | .....          | .....          |
| PF07_0004_exon2_Kilifi_023   | T.A..A..   | .A.....    | .....C...  | .....A...  | .....      | .....      | .....          | .....          |
| PF07_0004_exon2_Kilifi_057   | T.A..A..   | .....      | .....C...  | .....A...  | .....      | .....      | .....          | .....          |
| PF07_0004_exon2_Kilifi_191   | T.A..A..   | .....      | .....C...  | .....A...  | .....      | .....      | .....          | .....          |
| PF07_0004_exon2_Kilifi_194   | -...A...   | .....      | .....      | .....      | .....      | .....      | .....          | .....          |
| PF07_0004_exon2_Kilifi_250   | -.....     | .....      | .....      | .....      | .....      | .....      | .....          | .....          |
| PF07_0004_exon2_Kilifi_289   | -.....     | .....      | .....      | .....      | .....      | .....      | .....          | .....          |
| PF07_0004_exon2_Kilifi_328   | T.A..A..   | .A.....    | .....C...  | .....A...  | .....      | .....      | .....          | .....          |
| PF07_0004_exon2_Kilifi_348   | T.A..A..   | .A.....    | .....C...  | .....A...  | .....      | .....      | .....AA..T..T- | .....          |
| <i>Plasmodium reichenowi</i> | -----      | -----      | -----      | -----      | -----      | T.G.....   | .....          | .....AA..T..T- |

|                              | 2810      | 2820       | 2830       | 2840       | 2850       | 2860       | 2870       | 2880       |
|------------------------------|-----------|------------|------------|------------|------------|------------|------------|------------|
| PF07_0004_3D7_exon2          | AAAAAATAA | ACAAAATAAT | ACTCCTGTGC | AAAATACAAT | AAGTAAATCT | CAAGTACAAA | ATAGAGTAAA | TAAATCTCCA |
| PF07_0004_exon2_Kilifi_311   | .....     | .....      | .....G.    | .....      | .....      | .....      | .....      | .....      |
| PF07_0004_exon2_Kilifi_314   | .....     | .....      | .....G.    | .....      | .....      | .....      | .....      | .....      |
| PF07_0004_exon2_Kilifi_319   | ..C.C...T | .....GG    | G.A...CAA. | .....A.CA  | ..A...TA.. | .CT.....   | ...C.A...G | .....A.    |
| PF07_0004_exon2_Kilifi_321   | .....     | .....      | .....G.    | .....      | .....      | .....      | .....      | .....      |
| PF07_0004_exon2_Kilifi_322   | .....     | .....      | .....      | .....      | .....      | .....      | .....      | .....      |
| PF07_0004_exon2_Kilifi_323   | .....     | .....      | .....G.    | .....      | .....      | .....      | .....      | .....      |
| PF07_0004_exon2_Kilifi_258   | .....     | .....      | .....      | .....      | .....      | .....      | .....      | .....      |
| PF07_0004_exon2_Kilifi_290   | .....     | .....      | .....G.    | .....      | .....      | .....      | .....      | .....      |
| PF07_0004_exon2_Kilifi_297   | .....     | .....      | .....G.    | .....      | .....      | .....      | .....      | .....      |
| PF07_0004_exon2_Kilifi_299   | .....     | .....      | .....      | .....      | .....      | .....      | .....      | .....      |
| PF07_0004_exon2_Kilifi_301   | .....     | .....      | .....G.    | .....      | .....      | .....      | .....      | .....      |
| PF07_0004_exon2_Kilifi_302   | .....     | .....      | .....      | .....      | .....      | .....      | .....      | .....      |
| PF07_0004_exon2_Kilifi_310   | .....     | .....      | .....      | .....      | .....      | .....      | .....      | .....      |
| PF07_0004_exon2_Kilifi_019   | .....     | .....      | .....G.    | .....      | .....      | .....      | .....      | .....      |
| PF07_0004_exon2_Kilifi_044   | .....     | .....      | .....G.    | .....      | .....      | .....      | .....      | .....      |
| PF07_0004_exon2_Kilifi_093   | .....     | .....      | .....      | .....      | .....      | .....      | .....      | .....      |
| PF07_0004_exon2_Kilifi_097   | .....     | .....      | .....      | .....      | .....      | .....      | .....      | .....      |
| PF07_0004_exon2_Kilifi_201   | .....     | .....      | .....      | .....      | .....      | .....      | .....      | .....      |
| PF07_0004_exon2_Kilifi_235   | .....     | .....      | .....      | .....      | .....      | .....      | .....      | .....      |
| PF07_0004_exon2_Kilifi_245   | .....     | .....      | .....G.    | .....      | .....      | .....      | .....      | .....      |
| PF07_0004_exon2_Kilifi_027   | .....     | .....      | .....G.    | .....      | .....      | .....      | .....      | .....      |
| PF07_0004_exon2_Kilifi_028   | .....     | .....      | .....      | .....      | .....      | .....      | .....      | .....      |
| PF07_0004_exon2_Kilifi_050   | .....     | .....      | .....G.    | .....      | .....      | .....      | .....      | .....      |
| PF07_0004_exon2_Kilifi_052   | .....     | .....      | .....      | .....      | .....      | .....      | .....      | .....      |
| PF07_0004_exon2_Kilifi_062   | .....     | .....      | .....G.    | .....      | .....      | .....      | .....      | .....      |
| PF07_0004_exon2_Kilifi_082   | .....     | .....      | .....G.    | .....      | .....      | .....      | .....      | .....      |
| PF07_0004_exon2_Kilifi_091   | .....     | .....      | .....      | .....      | A.....     | .....      | .....      | .....      |
| PF07_0004_exon2_Kilifi_105   | .....     | .....      | .....      | .....      | A.....     | .....      | .....      | .....      |
| PF07_0004_exon2_Kilifi_110   | .....     | .....      | .....      | .....      | .....      | .....      | .....      | .....      |
| PF07_0004_exon2_Kilifi_160   | .....     | .....      | .....G.    | .....      | .....      | .....      | .....      | .....      |
| PF07_0004_exon2_Kilifi_164   | .....     | .....      | .....      | .....      | A.....     | .....      | .....      | .....      |
| PF07_0004_exon2_Kilifi_199   | .....     | .....      | .....G.    | .....      | .....      | .....      | .....      | .....      |
| PF07_0004_exon2_Kilifi_202   | .....     | .....      | .....      | .....      | .....      | .....      | .....      | .....      |
| PF07_0004_exon2_Kilifi_247   | .....     | .....      | .....G.    | .....      | .....      | .....      | .....      | .....      |
| PF07_0004_exon2_Kilifi_249   | .....     | .....      | .....G.    | .....      | .....      | .....      | .....      | .....      |
| PF07_0004_exon2_Kilifi_333   | .....     | .....      | .....G.    | .....      | .....      | .....      | .....      | .....      |
| PF07_0004_exon2_Kilifi_334   | .....     | .....      | .....G.    | .....      | .....      | .....      | .....      | .....      |
| PF07_0004_exon2_Kilifi_340   | .....     | .....      | .....G.    | .....      | .....      | .....      | .....      | .....      |
| PF07_0004_exon2_Kilifi_343   | .....     | .....      | .....      | .....      | .....      | .....      | .....      | .....      |
| PF07_0004_exon2_Kilifi_344   | .....     | .....      | .....G.    | .....      | .....      | .....      | .....      | .....      |
| PF07_0004_exon2_Kilifi_345   | .....     | .....      | .....      | .....      | .....      | .....      | .....      | .....      |
| PF07_0004_exon2_Kilifi_349   | ..C.C...T | .....GG    | G.A...CAA. | .....A.CA  | ..A...TA.. | .CT.....   | ...C.A...G | .....A.    |
| PF07_0004_exon2_Kilifi_356   | .....     | .....      | .....G.    | .....      | .....      | .....      | .....      | .....      |
| PF07_0004_exon2_Kilifi_364   | .....     | .....      | .....G.    | .....      | .....      | .....      | .....      | .....      |
| PF07_0004_exon2_Kilifi_328   | .....     | .....      | .....G.    | .....      | .....      | .....      | .....      | .....      |
| PF07_0004_exon2_Kilifi_365   | ..C.C...T | .....GG    | G.A...CAA. | .....A.CA  | ..A...TA.. | .CT.....   | ...C.A...G | .....A.    |
| PF07_0004_exon2_Kilifi_384   | ..C.C...T | .....GG    | G.A...CAA. | .....A.CA  | ..A...TA.. | .CT.....   | ...C.A...G | .....A.    |
| PF07_0004_exon2_Kilifi_389   | .....     | .....      | .....      | .....      | .....      | .....      | .....      | .....      |
| PF07_0004_exon2_Kilifi_406   | .....     | .....      | .....G.    | .....      | .....      | .....      | .....      | .....      |
| PF07_0004_exon2_Kilifi_510   | .....     | .....      | .....      | .....      | .....      | .....      | .....      | .....      |
| PF07_0004_exon2_Kilifi_366   | .....     | .....      | .....G.    | .....      | .....      | .....      | .....      | .....      |
| PF07_0004_exon2_Kilifi_023   | .....     | .....      | .....G.    | .....      | .....      | .....      | .....      | .....      |
| PF07_0004_exon2_Kilifi_057   | .....     | .....      | .....G.    | .....      | .....      | .....      | .....      | .....      |
| PF07_0004_exon2_Kilifi_191   | .....     | .....      | .....G.    | .....      | .....      | .....      | .....      | .....      |
| PF07_0004_exon2_Kilifi_194   | .....     | .....      | .....      | .....      | .....      | .....      | .....      | .....      |
| PF07_0004_exon2_Kilifi_250   | .....     | .....      | .....      | .....      | .....      | .....      | .....      | .....      |
| PF07_0004_exon2_Kilifi_289   | .....     | .....      | .....      | .....      | .....      | .....      | .....      | .....      |
| PF07_0004_exon2_Kilifi_328   | .....     | .....      | .....G.    | .....      | .....      | .....      | .....      | .....      |
| PF07_0004_exon2_Kilifi_348   | .....     | .....      | .....G.    | .....      | .....      | .....      | .....      | .....      |
| <i>Plasmodium reichenowi</i> | -----     | -----      | -----T.A.  | .....G.    | .....A.    | TC...G.... | -----      | -----      |

|                              | 2890       | 2900        | 2910        | 2920        | 2930       | 2940        | 2950        | 2960       |
|------------------------------|------------|-------------|-------------|-------------|------------|-------------|-------------|------------|
| PF07_0004_3D7_exon2          | GTGCAAAATG | ATTATTCAAA  | ACATAATGGA  | CGAGGTCCTA  | ACCAAATGAA | TAGACCTAAT  | CCTAATAGAC  | ATGTAGCACA |
| PF07_0004_exon2_Kilifi_311   | ..A.....   | .....       | .....       | .....       | .....T..   | .....A..... | .....       | .....      |
| PF07_0004_exon2_Kilifi_314   | ..A.....   | .....       | .....       | .....       | .....      | .....       | .....       | .....      |
| PF07_0004_exon2_Kilifi_319   | ..A.....   | .....G      | .....A..... | .....       | .....T..   | .....A..... | .....       | .....      |
| PF07_0004_exon2_Kilifi_321   | ..A.....   | .....       | .....       | .....       | .....      | .....       | .....       | .....      |
| PF07_0004_exon2_Kilifi_322   | .....      | .....       | .....       | .....       | .....      | .....       | .....       | .....      |
| PF07_0004_exon2_Kilifi_323   | .....      | .....       | .....       | .....       | .....      | .....       | .....       | .....      |
| PF07_0004_exon2_Kilifi_258   | .....      | .....       | .....       | .....       | .....      | .....       | .....       | .....      |
| PF07_0004_exon2_Kilifi_290   | ..A.....   | .....       | .....A..... | .....       | .....      | .....       | .....       | .....      |
| PF07_0004_exon2_Kilifi_297   | .....      | .....       | .....       | .....       | .....      | .....       | .....       | .....      |
| PF07_0004_exon2_Kilifi_299   | .....      | .....       | .....       | .....       | .....      | .....       | .....       | .....      |
| PF07_0004_exon2_Kilifi_301   | ..A.....   | .....       | .....G..... | .....       | .....      | .....       | .....       | .....      |
| PF07_0004_exon2_Kilifi_302   | .....      | .....       | .....       | .....       | .....      | .....       | .....       | .....      |
| PF07_0004_exon2_Kilifi_310   | .....      | .....       | .....       | .....       | .....      | .....       | .....       | .....      |
| PF07_0004_exon2_Kilifi_019   | ..A.....   | .....       | .....       | .....       | .....      | .....       | .....       | .....      |
| PF07_0004_exon2_Kilifi_044   | ..A.....   | .....       | .....       | .....       | .....      | .....       | .....       | .....      |
| PF07_0004_exon2_Kilifi_093   | .....      | .....       | .....       | .....       | .....      | .....       | .....       | .....      |
| PF07_0004_exon2_Kilifi_097   | ..A.....   | .....       | .....A..... | .....       | .....T..   | .....       | .....       | .....      |
| PF07_0004_exon2_Kilifi_201   | .....      | .....       | .....       | .....       | .....      | .....       | .....       | .....      |
| PF07_0004_exon2_Kilifi_235   | .....      | .....       | .....       | .....       | .....      | .....       | .....       | .....      |
| PF07_0004_exon2_Kilifi_245   | ..A.....   | .....       | .....A..... | .....       | .....T..   | .....       | .....       | .....      |
| PF07_0004_exon2_Kilifi_027   | ..A.....   | .....       | .....       | .....       | .....      | .....       | .....       | .....      |
| PF07_0004_exon2_Kilifi_028   | .....      | .....       | .....       | .....       | .....      | .....       | .....       | .....      |
| PF07_0004_exon2_Kilifi_050   | ..A.....   | .....       | .....       | .....       | .....      | .....       | .....       | .....      |
| PF07_0004_exon2_Kilifi_052   | -----      | .....       | .....       | .....       | .....      | .....       | .....       | .....      |
| PF07_0004_exon2_Kilifi_062   | ..A.....   | .....       | .....A..... | .....       | .....T..   | .....       | .....       | .....      |
| PF07_0004_exon2_Kilifi_082   | ..A.....   | .....       | .....A..... | .....       | .....T..   | .....       | .....       | .....      |
| PF07_0004_exon2_Kilifi_091   | .....      | .....       | .....       | .....T..... | .....      | .....       | .....       | .....      |
| PF07_0004_exon2_Kilifi_105   | .....      | .....       | .....       | .....       | .....      | .....       | .....       | .....      |
| PF07_0004_exon2_Kilifi_110   | .....      | .....       | .....       | .....       | .....      | .....       | .....       | .....      |
| PF07_0004_exon2_Kilifi_160   | ..A.....   | .....       | .....A..... | .....       | .....T..   | .....       | .....       | .....      |
| PF07_0004_exon2_Kilifi_164   | .....      | .....       | .....       | .....       | .....      | .....       | .....       | .....      |
| PF07_0004_exon2_Kilifi_199   | ..A.....   | .....       | .....A..... | .....       | .....T..   | .....       | .....       | .....      |
| PF07_0004_exon2_Kilifi_202   | .....      | .....       | .....       | .....       | .....      | .....       | .....       | .....      |
| PF07_0004_exon2_Kilifi_247   | ..A.....   | .....       | .....A..... | .....       | .....      | .....       | .....       | .....      |
| PF07_0004_exon2_Kilifi_249   | ..A.....   | .....       | .....       | .....       | .....      | .....       | .....       | .....      |
| PF07_0004_exon2_Kilifi_333   | ..A.....   | .....       | .....A..... | .....       | .....T..   | .....       | .....       | .....      |
| PF07_0004_exon2_Kilifi_334   | ..A.....   | .....       | .....A..... | .....       | .....T..   | .....       | .....       | .....      |
| PF07_0004_exon2_Kilifi_340   | ..A.....   | .....       | .....A..... | .....       | .....      | .....       | .....       | .....      |
| PF07_0004_exon2_Kilifi_343   | .....      | .....       | .....       | .....       | .....      | .....       | .....       | .....      |
| PF07_0004_exon2_Kilifi_344   | ..A.....   | .....       | .....       | .....       | .....      | .....       | .....       | .....      |
| PF07_0004_exon2_Kilifi_345   | .....      | .....       | .....       | .....       | .....      | .....       | .....       | .....      |
| PF07_0004_exon2_Kilifi_349   | ..A.....   | .....G      | .....A..... | .....       | .....T..   | .....A..... | .....       | .....      |
| PF07_0004_exon2_Kilifi_356   | ..A.....   | .....       | .....A..... | .....       | .....T..   | .....       | .....       | .....      |
| PF07_0004_exon2_Kilifi_364   | .....      | .....       | .....A..... | .....       | .....      | .....       | .....       | .....      |
| PF07_0004_exon2_Kilifi_328   | ..A.....   | .....       | .....A..... | .....       | .....T..   | .....       | .....       | .....      |
| PF07_0004_exon2_Kilifi_365   | ..A.....   | .....G      | .....A..... | .....       | .....T..   | .....A..... | .....       | .....      |
| PF07_0004_exon2_Kilifi_384   | ..A.....   | .....G      | .....A..... | .....       | .....T..   | .....       | .....       | .....      |
| PF07_0004_exon2_Kilifi_389   | .....      | .....       | .....       | .....       | .....      | .....       | .....       | .....      |
| PF07_0004_exon2_Kilifi_406   | ..A.....   | .....       | .....A..... | .....       | .....T..   | .....       | .....       | .....      |
| PF07_0004_exon2_Kilifi_510   | .....      | .....       | .....       | .....       | .....      | .....       | .....       | .....      |
| PF07_0004_exon2_Kilifi_366   | .....      | .....       | .....       | .....       | .....      | .....       | .....       | .....      |
| PF07_0004_exon2_Kilifi_023   | ..A.....   | .....       | .....A..... | .....       | .....T..   | .....       | .....       | .....      |
| PF07_0004_exon2_Kilifi_057   | ..A.....   | .....       | .....A..... | .....       | .....T..   | .....       | .....       | .....      |
| PF07_0004_exon2_Kilifi_191   | ..A.....   | .....       | .....A..... | .....       | .....T..   | .....       | .....       | .....      |
| PF07_0004_exon2_Kilifi_194   | .....      | .....       | .....       | .....       | .....      | .....       | .....       | .....      |
| PF07_0004_exon2_Kilifi_250   | .....      | .....       | .....       | .....       | .....      | .....       | .....       | .....      |
| PF07_0004_exon2_Kilifi_289   | .....      | .....       | .....       | .....       | .....      | .....       | .....       | .....      |
| PF07_0004_exon2_Kilifi_328   | ..A.....   | .....       | .....A..... | .....       | .....T..   | .....       | .....       | .....      |
| PF07_0004_exon2_Kilifi_348   | ..A.....   | .....       | .....A..... | .....       | .....T..   | .....       | .....       | .....      |
| <i>Plasmodium reichenowi</i> | -----      | .....G..... | .....A..... | .....       | .....T..   | .....       | .....A..... | .....      |



```

PF07_0004_3D7_exon2      ....|....| ...
                          ACCATTAAGA TAA
PF07_0004_exon2_Kilifi_311 .....
PF07_0004_exon2_Kilifi_314 .....
PF07_0004_exon2_Kilifi_319 .....
PF07_0004_exon2_Kilifi_321 .....
PF07_0004_exon2_Kilifi_322 .....
PF07_0004_exon2_Kilifi_323 .....
PF07_0004_exon2_Kilifi_258 .....
PF07_0004_exon2_Kilifi_290 .....
PF07_0004_exon2_Kilifi_297 .....
PF07_0004_exon2_Kilifi_299 .....
PF07_0004_exon2_Kilifi_301 .....
PF07_0004_exon2_Kilifi_302 .....
PF07_0004_exon2_Kilifi_310 .....
PF07_0004_exon2_Kilifi_019 .....
PF07_0004_exon2_Kilifi_044 .....
PF07_0004_exon2_Kilifi_093 .....
PF07_0004_exon2_Kilifi_097 .....
PF07_0004_exon2_Kilifi_201 .....
PF07_0004_exon2_Kilifi_235 .....
PF07_0004_exon2_Kilifi_245 .....
PF07_0004_exon2_Kilifi_027 .....
PF07_0004_exon2_Kilifi_028 .....
PF07_0004_exon2_Kilifi_050 .....
PF07_0004_exon2_Kilifi_052 .....
PF07_0004_exon2_Kilifi_062 .....
PF07_0004_exon2_Kilifi_082 .....
PF07_0004_exon2_Kilifi_091 .....
PF07_0004_exon2_Kilifi_105 .....
PF07_0004_exon2_Kilifi_110 .....
PF07_0004_exon2_Kilifi_160 .....
PF07_0004_exon2_Kilifi_164 .....
PF07_0004_exon2_Kilifi_199 .....
PF07_0004_exon2_Kilifi_202 .....
PF07_0004_exon2_Kilifi_247 .....
PF07_0004_exon2_Kilifi_249 .....
PF07_0004_exon2_Kilifi_333 .....
PF07_0004_exon2_Kilifi_334 .....
PF07_0004_exon2_Kilifi_340 .....
PF07_0004_exon2_Kilifi_343 .....
PF07_0004_exon2_Kilifi_344 .....
PF07_0004_exon2_Kilifi_345 .....
PF07_0004_exon2_Kilifi_349 .....
PF07_0004_exon2_Kilifi_356 .....
PF07_0004_exon2_Kilifi_364 .....
PF07_0004_exon2_Kilifi_328 .....
PF07_0004_exon2_Kilifi_365 .....
PF07_0004_exon2_Kilifi_384 .....
PF07_0004_exon2_Kilifi_389 .....
PF07_0004_exon2_Kilifi_406 .....
PF07_0004_exon2_Kilifi_510 .....
PF07_0004_exon2_Kilifi_366 .....
PF07_0004_exon2_Kilifi_023 .....
PF07_0004_exon2_Kilifi_057 .....
PF07_0004_exon2_Kilifi_191 .....
PF07_0004_exon2_Kilifi_194 .....
PF07_0004_exon2_Kilifi_250 .....
PF07_0004_exon2_Kilifi_289 .....
PF07_0004_exon2_Kilifi_328 .....
PF07_0004_exon2_Kilifi_348 .....
Plasmodium reichenowi .T..... .G.

```









|                              | 330        | 340        | 350        | 360       | 370        | 380        | 390        | 400        |
|------------------------------|------------|------------|------------|-----------|------------|------------|------------|------------|
| PF10_0342_3D7                | AGATAAAACA | AATAATAAAA | AATTAATTGA | GTCACCATC | ACCAATGAAA | AAACCCAAGG | AAAAAATTCT | TATCATGATG |
| PF10_0342_Kilifi_020         |            |            |            | A.        |            |            |            |            |
| PF10_0342_Kilifi_019         |            |            |            | A.        |            |            |            |            |
| PF10_0342_Kilifi_021         |            |            |            | A.        |            |            |            |            |
| PF10_0342_Kilifi_023         |            |            | .G.        | A.        |            |            |            |            |
| PF10_0342_Kilifi_027         |            |            |            | A.        |            |            |            |            |
| PF10_0342_Kilifi_028         |            |            |            | A.        |            |            |            |            |
| PF10_0342_Kilifi_044         |            |            |            |           |            |            |            |            |
| PF10_0342_Kilifi_045         |            |            |            | A.        |            |            |            |            |
| PF10_0342_Kilifi_050         |            |            | .G.        | A.        |            |            |            |            |
| PF10_0342_Kilifi_051         |            |            | .G.        | A.        |            |            |            |            |
| PF10_0342_Kilifi_052         |            |            |            | A.        |            |            |            |            |
| PF10_0342_Kilifi_057         |            |            |            | A.        |            |            |            |            |
| PF10_0342_Kilifi_062         |            |            |            |           |            |            |            |            |
| PF10_0342_Kilifi_082         |            |            |            |           |            |            |            |            |
| PF10_0342_Kilifi_084         |            |            |            | A.        |            |            |            |            |
| PF10_0342_Kilifi_091         |            |            |            | A.        |            |            |            |            |
| PF10_0342_Kilifi_093         |            |            |            | A.        |            |            |            |            |
| PF10_0342_Kilifi_097         |            |            |            | A.        |            |            |            |            |
| PF10_0342_Kilifi_105         |            |            |            | A.        |            |            |            |            |
| PF10_0342_Kilifi_110         |            |            |            | A.        |            |            |            |            |
| PF10_0342_Kilifi_124         |            |            |            | A.        |            |            |            |            |
| PF10_0342_Kilifi_128         |            |            |            |           |            |            |            |            |
| PF10_0342_Kilifi_150         |            |            |            | A.        |            |            |            |            |
| PF10_0342_Kilifi_153         |            |            |            | A.        |            |            |            |            |
| PF10_0342_Kilifi_160         |            |            |            | A.        |            |            |            |            |
| PF10_0342_Kilifi_162         |            |            |            | A.        |            |            |            |            |
| PF10_0342_Kilifi_164         |            |            |            | A.        |            |            |            |            |
| PF10_0342_Kilifi_186         |            |            |            | A.        |            |            |            |            |
| PF10_0342_Kilifi_187         |            |            |            |           |            | .G.        |            |            |
| PF10_0342_Kilifi_191         |            |            |            | A.        |            |            |            |            |
| PF10_0342_Kilifi_194         |            |            |            | A.        |            |            |            |            |
| PF10_0342_Kilifi_199         |            |            |            |           |            |            |            |            |
| PF10_0342_Kilifi_201         |            |            |            | A.        |            |            |            |            |
| PF10_0342_Kilifi_202         |            |            |            | A.        |            |            |            |            |
| PF10_0342_Kilifi_214         |            |            |            | A.        |            |            |            |            |
| PF10_0342_Kilifi_216         |            |            |            |           |            |            |            |            |
| PF10_0342_Kilifi_235         |            |            |            | A.        |            |            |            |            |
| PF10_0342_Kilifi_242         |            |            |            |           |            |            |            |            |
| PF10_0342_Kilifi_245         |            |            |            | A.        |            |            |            |            |
| PF10_0342_Kilifi_249         |            |            | .G.        | A.        |            |            |            |            |
| PF10_0342_Kilifi_250         |            |            | .G.        | A.        |            |            |            |            |
| PF10_0342_Kilifi_258         |            |            |            | A.        |            |            |            |            |
| PF10_0342_Kilifi_262         |            |            |            | A.        |            |            |            |            |
| PF10_0342_Kilifi_289         |            |            | .G.        | A.        |            |            |            |            |
| PF10_0342_Kilifi_290         |            |            |            | A.        |            |            |            |            |
| PF10_0342_Kilifi_297         |            |            |            | A.        |            |            |            |            |
| PF10_0342_Kilifi_298         |            |            | .G.        | A.        |            |            |            |            |
| PF10_0342_Kilifi_299         |            |            |            | A.        |            |            |            |            |
| PF10_0342_Kilifi_301         |            |            |            | A.        |            |            |            |            |
| PF10_0342_Kilifi_302         |            |            |            | A.        |            |            |            |            |
| PF10_0342_Kilifi_304         |            |            | .G.        |           |            |            |            |            |
| PF10_0342_Kilifi_307         |            |            |            | A.        |            |            |            |            |
| PF10_0342_Kilifi_310         |            |            | .G.        |           |            |            |            |            |
| PF10_0342_Kilifi_311         |            |            |            | A.        |            |            |            |            |
| PF10_0342_Kilifi_314         |            |            |            |           |            |            |            |            |
| PF10_0342_Kilifi_319         |            |            |            | A.        |            |            |            |            |
| PF10_0342_Kilifi_321         |            |            |            | A.        |            |            |            |            |
| PF10_0342_Kilifi_322         |            |            |            | A.        |            |            |            |            |
| PF10_0342_Kilifi_323         |            |            |            | A.        |            |            |            |            |
| PF10_0342_Kilifi_324         |            |            |            | A.        |            |            |            |            |
| PF10_0342_Kilifi_328         |            |            |            |           |            |            |            |            |
| PF10_0342_Kilifi_331         |            |            |            |           |            |            |            |            |
| PF10_0342_Kilifi_333         |            |            |            | A.        |            |            |            |            |
| PF10_0342_Kilifi_334         |            |            |            | A.        |            |            |            |            |
| PF10_0342_Kilifi_336         |            |            |            |           |            |            |            |            |
| PF10_0342_Kilifi_340         |            |            |            | A.        |            |            |            |            |
| PF10_0342_Kilifi_343         |            |            |            | A.        |            |            |            |            |
| PF10_0342_Kilifi_344         |            |            |            | A.        |            |            |            |            |
| PF10_0342_Kilifi_345         |            |            | .G.        | A.        |            |            |            |            |
| PF10_0342_Kilifi_348         |            |            | .G.        |           |            |            |            |            |
| PF10_0342_Kilifi_356         |            |            |            | A.        |            |            |            |            |
| PF10_0342_Kilifi_359         |            |            |            | A.        |            |            |            |            |
| PF10_0342_Kilifi_364         |            |            |            |           |            |            |            |            |
| PF10_0342_Kilifi_365         |            |            |            | A.        |            |            |            |            |
| PF10_0342_Kilifi_384         |            |            | .G.        | A.        |            |            |            |            |
| PF10_0342_Kilifi_389         |            |            |            | A.        |            |            |            |            |
| PF10_0342_Kilifi_406         |            |            |            | A.        |            |            |            |            |
| PF10_0342_Kilifi_510         |            |            |            |           |            |            |            |            |
| PF10_0342_Kilifi_528         |            |            |            | A.        |            |            |            |            |
| <i>Plasmodium reichenowi</i> |            |            |            | A.        | A.         | T.         | G.         | C.         |

|                              | 410        | 420        | 430        | 440        | 450        | 460        | 470        | 480        |
|------------------------------|------------|------------|------------|------------|------------|------------|------------|------------|
| PF10_0342_3D7                | ATGAAAATAC | TATTGAATGT | AGTCATCCTG | AAGCACTTGT | GGGTGGAGAG | AAAAATCGTC | AAAATTCFTT | TGCTTTACGA |
| PF10_0342_Kilifi_020         |            |            | G          |            |            |            |            | T          |
| PF10_0342_Kilifi_019         |            |            | G          |            |            |            |            | T          |
| PF10_0342_Kilifi_021         |            |            | G          |            |            |            |            | T          |
| PF10_0342_Kilifi_023         |            |            |            |            |            |            |            |            |
| PF10_0342_Kilifi_027         |            |            | G          |            |            | T          |            | T          |
| PF10_0342_Kilifi_028         |            |            | G          |            |            |            |            | T          |
| PF10_0342_Kilifi_044         |            |            |            |            |            |            |            |            |
| PF10_0342_Kilifi_045         |            |            | G          |            |            |            |            | T          |
| PF10_0342_Kilifi_050         |            |            |            |            |            |            |            |            |
| PF10_0342_Kilifi_051         |            |            |            |            |            |            |            |            |
| PF10_0342_Kilifi_052         |            |            | G          |            |            |            |            | T          |
| PF10_0342_Kilifi_057         |            |            | G          |            |            |            |            | T          |
| PF10_0342_Kilifi_062         |            |            |            |            |            |            |            | T          |
| PF10_0342_Kilifi_082         |            |            |            |            |            |            |            |            |
| PF10_0342_Kilifi_084         |            |            | G          |            |            |            |            | T          |
| PF10_0342_Kilifi_091         |            |            | G          |            |            |            |            | T          |
| PF10_0342_Kilifi_093         |            |            | G          |            |            |            |            | T          |
| PF10_0342_Kilifi_097         |            |            | G          |            |            |            |            | T          |
| PF10_0342_Kilifi_105         |            |            | G          |            |            |            |            | T          |
| PF10_0342_Kilifi_110         |            |            | G          |            |            |            |            |            |
| PF10_0342_Kilifi_124         |            |            | G          |            |            |            |            | T          |
| PF10_0342_Kilifi_128         |            |            |            |            |            |            |            |            |
| PF10_0342_Kilifi_150         |            |            | G          |            |            |            |            | T          |
| PF10_0342_Kilifi_153         |            |            | G          |            |            |            |            | T          |
| PF10_0342_Kilifi_160         |            |            | G          |            |            |            |            | T          |
| PF10_0342_Kilifi_162         |            |            | G          |            |            |            |            | T          |
| PF10_0342_Kilifi_164         |            |            | G          |            |            |            |            | T          |
| PF10_0342_Kilifi_186         |            |            | G          |            |            |            |            | T          |
| PF10_0342_Kilifi_187         |            |            | G          |            |            |            |            | T          |
| PF10_0342_Kilifi_191         |            |            | G          |            |            |            |            | T          |
| PF10_0342_Kilifi_194         |            |            | G          |            |            |            |            | T          |
| PF10_0342_Kilifi_199         |            |            | G          |            |            |            |            | T          |
| PF10_0342_Kilifi_201         |            |            | G          |            |            |            |            | T          |
| PF10_0342_Kilifi_202         |            |            | G          |            |            |            |            | T          |
| PF10_0342_Kilifi_214         |            |            | G          |            |            |            |            | T          |
| PF10_0342_Kilifi_216         |            |            | G          |            |            |            |            | T          |
| PF10_0342_Kilifi_235         |            |            | G          |            |            |            |            | T          |
| PF10_0342_Kilifi_242         |            |            |            |            |            |            |            | T          |
| PF10_0342_Kilifi_245         |            |            | G          |            |            |            |            | T          |
| PF10_0342_Kilifi_249         |            |            |            |            |            |            |            | T          |
| PF10_0342_Kilifi_250         |            |            |            |            |            |            |            |            |
| PF10_0342_Kilifi_258         |            |            |            |            |            |            |            |            |
| PF10_0342_Kilifi_262         |            |            | G          |            |            |            |            | T          |
| PF10_0342_Kilifi_289         |            |            |            |            |            |            |            |            |
| PF10_0342_Kilifi_290         |            |            | G          |            |            |            |            | T          |
| PF10_0342_Kilifi_297         |            |            | G          |            |            |            |            | T          |
| PF10_0342_Kilifi_298         |            |            |            |            |            |            |            |            |
| PF10_0342_Kilifi_299         |            |            | G          |            |            |            |            | T          |
| PF10_0342_Kilifi_301         |            |            | G          |            |            |            |            | T          |
| PF10_0342_Kilifi_302         |            |            | G          |            |            |            |            |            |
| PF10_0342_Kilifi_304         |            |            |            |            |            |            |            | T          |
| PF10_0342_Kilifi_307         |            |            | G          |            |            |            |            | T          |
| PF10_0342_Kilifi_310         |            |            |            |            |            |            |            |            |
| PF10_0342_Kilifi_311         |            |            | G          |            |            |            |            | T          |
| PF10_0342_Kilifi_314         |            |            |            |            |            |            |            |            |
| PF10_0342_Kilifi_319         |            |            | G          |            |            |            |            | T          |
| PF10_0342_Kilifi_321         |            |            | G          |            |            |            |            | T          |
| PF10_0342_Kilifi_322         |            |            | G          |            |            |            |            | T          |
| PF10_0342_Kilifi_323         |            |            | G          |            |            |            |            | T          |
| PF10_0342_Kilifi_324         |            |            |            |            |            |            |            |            |
| PF10_0342_Kilifi_328         |            |            | G          |            |            |            |            | T          |
| PF10_0342_Kilifi_331         |            |            | G          |            |            |            |            | T          |
| PF10_0342_Kilifi_333         |            |            | G          |            |            |            |            | T          |
| PF10_0342_Kilifi_334         |            |            | G          |            |            |            |            | T          |
| PF10_0342_Kilifi_336         |            |            | G          |            |            |            |            |            |
| PF10_0342_Kilifi_340         |            |            | G          |            |            |            |            | T          |
| PF10_0342_Kilifi_343         |            |            | G          |            |            |            |            | T          |
| PF10_0342_Kilifi_344         |            |            | G          |            |            |            |            | T          |
| PF10_0342_Kilifi_345         |            |            |            |            |            |            |            |            |
| PF10_0342_Kilifi_348         |            |            |            |            |            |            |            |            |
| PF10_0342_Kilifi_356         |            |            | G          |            |            |            |            | T          |
| PF10_0342_Kilifi_359         |            |            | G          |            |            |            |            | T          |
| PF10_0342_Kilifi_364         |            |            | G          |            |            |            |            | T          |
| PF10_0342_Kilifi_365         |            |            | G          |            |            |            |            | T          |
| PF10_0342_Kilifi_384         |            |            |            |            |            |            |            |            |
| PF10_0342_Kilifi_389         |            |            | G          |            |            |            |            | T          |
| PF10_0342_Kilifi_406         |            |            | G          |            |            |            |            | T          |
| PF10_0342_Kilifi_510         |            |            |            |            |            |            |            | T          |
| PF10_0342_Kilifi_528         |            |            | G          |            |            |            |            | T          |
| <i>Plasmodium reichenowi</i> |            |            | G          |            |            |            |            | T          |









|                              | 730        | 740        | 750        | 760        | 770        | 780        | 790        | 800        |
|------------------------------|------------|------------|------------|------------|------------|------------|------------|------------|
| PF10_0342_3D7                | TTAGATGGAC | ATCAAAGTAA | TATTGGGTCT | TTTCAATTAG | TTTACGAGGG | ACTTCATCAT | GGAAACGATG | GAGTACACGG |
| PF10_0342_Kilifi_020         |            |            |            |            |            |            |            |            |
| PF10_0342_Kilifi_019         |            |            |            |            |            |            |            |            |
| PF10_0342_Kilifi_021         |            |            |            |            |            |            |            |            |
| PF10_0342_Kilifi_023         |            |            |            |            |            |            |            |            |
| PF10_0342_Kilifi_027         |            |            |            |            |            |            |            |            |
| PF10_0342_Kilifi_028         |            |            |            |            |            |            |            |            |
| PF10_0342_Kilifi_044         |            |            |            |            |            |            |            |            |
| PF10_0342_Kilifi_045         |            |            |            |            |            |            |            |            |
| PF10_0342_Kilifi_050         |            |            |            |            |            |            |            |            |
| PF10_0342_Kilifi_051         |            |            |            |            |            |            |            |            |
| PF10_0342_Kilifi_052         |            |            |            |            |            |            |            |            |
| PF10_0342_Kilifi_057         |            |            |            |            |            |            |            |            |
| PF10_0342_Kilifi_062         |            |            |            |            |            |            |            |            |
| PF10_0342_Kilifi_082         |            |            |            |            |            |            |            |            |
| PF10_0342_Kilifi_084         |            |            |            |            |            |            |            |            |
| PF10_0342_Kilifi_091         |            |            |            |            |            |            |            |            |
| PF10_0342_Kilifi_093         |            |            |            |            |            |            |            |            |
| PF10_0342_Kilifi_097         |            |            |            |            |            |            |            |            |
| PF10_0342_Kilifi_105         |            |            |            |            |            |            |            |            |
| PF10_0342_Kilifi_110         |            |            |            |            |            |            |            |            |
| PF10_0342_Kilifi_124         |            |            |            |            |            |            |            |            |
| PF10_0342_Kilifi_128         |            |            |            |            |            |            |            |            |
| PF10_0342_Kilifi_150         |            |            |            |            |            |            |            |            |
| PF10_0342_Kilifi_153         |            |            |            |            |            |            |            |            |
| PF10_0342_Kilifi_160         |            |            |            |            |            |            |            |            |
| PF10_0342_Kilifi_162         |            |            |            |            |            |            |            |            |
| PF10_0342_Kilifi_164         |            |            |            |            |            |            |            |            |
| PF10_0342_Kilifi_186         |            |            |            |            |            |            |            |            |
| PF10_0342_Kilifi_187         |            |            | A          |            |            |            |            |            |
| PF10_0342_Kilifi_191         |            |            |            |            |            |            |            |            |
| PF10_0342_Kilifi_194         |            |            |            |            |            |            |            |            |
| PF10_0342_Kilifi_199         |            |            |            |            |            |            |            |            |
| PF10_0342_Kilifi_201         |            |            |            |            |            |            |            |            |
| PF10_0342_Kilifi_202         |            |            |            |            |            |            |            |            |
| PF10_0342_Kilifi_214         |            |            |            |            |            |            |            |            |
| PF10_0342_Kilifi_216         |            |            |            |            |            |            |            |            |
| PF10_0342_Kilifi_235         |            |            |            |            |            |            |            |            |
| PF10_0342_Kilifi_242         |            |            |            |            |            |            |            |            |
| PF10_0342_Kilifi_245         |            |            |            |            |            |            |            |            |
| PF10_0342_Kilifi_249         |            |            |            |            |            |            |            |            |
| PF10_0342_Kilifi_250         |            |            |            |            |            |            |            |            |
| PF10_0342_Kilifi_258         |            |            |            |            |            |            |            |            |
| PF10_0342_Kilifi_262         |            |            |            |            |            |            |            |            |
| PF10_0342_Kilifi_289         |            |            |            |            |            |            |            |            |
| PF10_0342_Kilifi_290         |            |            |            |            |            |            |            |            |
| PF10_0342_Kilifi_297         |            |            |            |            |            |            |            |            |
| PF10_0342_Kilifi_298         |            |            |            |            |            |            |            |            |
| PF10_0342_Kilifi_299         |            |            |            |            |            |            |            |            |
| PF10_0342_Kilifi_301         |            |            |            |            |            |            |            |            |
| PF10_0342_Kilifi_302         |            |            |            |            |            |            |            |            |
| PF10_0342_Kilifi_304         |            |            |            |            |            |            |            |            |
| PF10_0342_Kilifi_307         |            |            |            |            |            |            |            |            |
| PF10_0342_Kilifi_310         |            |            |            |            |            |            |            |            |
| PF10_0342_Kilifi_311         |            |            |            |            |            |            |            |            |
| PF10_0342_Kilifi_314         |            |            |            |            |            |            |            |            |
| PF10_0342_Kilifi_319         |            |            |            |            |            |            |            |            |
| PF10_0342_Kilifi_321         |            |            |            |            |            |            |            |            |
| PF10_0342_Kilifi_322         |            |            |            |            |            |            |            |            |
| PF10_0342_Kilifi_323         |            |            |            |            |            |            |            |            |
| PF10_0342_Kilifi_324         |            |            |            |            |            |            |            |            |
| PF10_0342_Kilifi_328         |            |            |            |            |            |            |            |            |
| PF10_0342_Kilifi_331         |            |            |            |            |            |            |            |            |
| PF10_0342_Kilifi_333         |            |            |            |            |            |            |            |            |
| PF10_0342_Kilifi_334         |            |            |            |            |            |            |            |            |
| PF10_0342_Kilifi_336         |            |            |            |            |            |            |            |            |
| PF10_0342_Kilifi_340         |            |            |            |            |            |            |            |            |
| PF10_0342_Kilifi_343         |            |            |            |            |            |            |            |            |
| PF10_0342_Kilifi_344         |            |            |            |            |            |            |            |            |
| PF10_0342_Kilifi_345         |            |            |            |            |            |            |            |            |
| PF10_0342_Kilifi_348         |            |            |            |            |            |            |            |            |
| PF10_0342_Kilifi_356         |            |            |            |            |            |            |            |            |
| PF10_0342_Kilifi_359         |            |            |            |            |            |            |            |            |
| PF10_0342_Kilifi_364         |            |            |            |            |            |            |            |            |
| PF10_0342_Kilifi_365         |            |            |            |            |            |            |            |            |
| PF10_0342_Kilifi_384         |            |            |            |            |            |            |            |            |
| PF10_0342_Kilifi_389         |            |            |            |            |            |            |            |            |
| PF10_0342_Kilifi_406         |            |            |            |            |            |            |            |            |
| PF10_0342_Kilifi_510         |            |            |            |            |            |            |            |            |
| PF10_0342_Kilifi_528         |            |            |            |            |            |            |            |            |
| <i>Plasmodium reichenowi</i> |            |            |            |            |            | A          |            | A          |

|                              | 810        | 820        | 830        | 840        | 850        | 860         | 870        | 880         |
|------------------------------|------------|------------|------------|------------|------------|-------------|------------|-------------|
| PF10_0342_3D7                | AGCTACAGAA | GATAGAAAAA | AAGCAAGACC | ACAAAAAATA | AAAGGACCTA | ATCAAGAAAAG | AGTGGAACGT | ATTTCATGAAT |
| PF10_0342_Kilifi_020         |            |            |            |            |            |             |            |             |
| PF10_0342_Kilifi_019         |            |            |            |            |            |             |            | T           |
| PF10_0342_Kilifi_021         |            |            |            |            |            |             |            |             |
| PF10_0342_Kilifi_023         |            |            |            |            |            |             |            | T           |
| PF10_0342_Kilifi_027         |            |            |            |            |            |             |            |             |
| PF10_0342_Kilifi_028         |            |            |            |            |            |             |            |             |
| PF10_0342_Kilifi_044         |            |            |            |            |            |             |            |             |
| PF10_0342_Kilifi_045         |            |            |            |            |            |             |            |             |
| PF10_0342_Kilifi_050         |            |            |            |            |            |             |            |             |
| PF10_0342_Kilifi_051         |            |            |            |            |            |             |            |             |
| PF10_0342_Kilifi_052         |            |            |            |            |            |             |            |             |
| PF10_0342_Kilifi_057         |            |            |            |            |            |             |            | T           |
| PF10_0342_Kilifi_062         |            |            |            |            |            |             |            |             |
| PF10_0342_Kilifi_082         |            |            |            |            |            |             | A          |             |
| PF10_0342_Kilifi_084         |            |            |            |            |            |             |            |             |
| PF10_0342_Kilifi_091         |            |            |            |            |            |             |            |             |
| PF10_0342_Kilifi_093         |            |            |            |            |            |             |            |             |
| PF10_0342_Kilifi_097         |            |            |            |            |            |             |            |             |
| PF10_0342_Kilifi_105         |            |            |            |            |            |             |            |             |
| PF10_0342_Kilifi_110         |            |            |            |            |            |             |            | T           |
| PF10_0342_Kilifi_124         |            |            |            |            |            |             |            | T           |
| PF10_0342_Kilifi_128         |            |            |            |            |            |             |            |             |
| PF10_0342_Kilifi_150         |            |            |            |            |            |             |            | T           |
| PF10_0342_Kilifi_153         |            |            |            |            |            |             |            |             |
| PF10_0342_Kilifi_160         |            |            |            |            |            |             |            |             |
| PF10_0342_Kilifi_162         |            |            |            |            |            |             |            |             |
| PF10_0342_Kilifi_164         |            |            |            |            |            |             |            |             |
| PF10_0342_Kilifi_186         |            |            |            |            |            |             |            |             |
| PF10_0342_Kilifi_187         |            |            |            |            |            |             |            |             |
| PF10_0342_Kilifi_191         |            |            |            |            |            |             |            |             |
| PF10_0342_Kilifi_194         |            |            |            |            |            |             |            |             |
| PF10_0342_Kilifi_199         |            |            |            |            |            |             |            |             |
| PF10_0342_Kilifi_201         |            |            |            |            |            |             |            |             |
| PF10_0342_Kilifi_202         |            |            |            |            |            |             |            |             |
| PF10_0342_Kilifi_214         |            |            |            |            |            |             |            |             |
| PF10_0342_Kilifi_216         |            |            |            |            |            |             |            |             |
| PF10_0342_Kilifi_235         |            |            |            |            |            |             |            |             |
| PF10_0342_Kilifi_242         |            |            |            |            |            |             |            |             |
| PF10_0342_Kilifi_245         |            |            |            |            |            |             |            |             |
| PF10_0342_Kilifi_249         |            |            |            |            |            |             |            |             |
| PF10_0342_Kilifi_250         |            |            |            |            |            |             |            |             |
| PF10_0342_Kilifi_258         |            |            |            |            |            |             |            |             |
| PF10_0342_Kilifi_262         |            |            |            |            |            |             |            |             |
| PF10_0342_Kilifi_289         |            |            |            |            |            |             |            |             |
| PF10_0342_Kilifi_290         |            |            |            |            |            |             |            |             |
| PF10_0342_Kilifi_297         |            |            |            |            |            |             |            |             |
| PF10_0342_Kilifi_298         |            |            |            |            |            |             |            |             |
| PF10_0342_Kilifi_299         |            |            |            |            |            |             |            |             |
| PF10_0342_Kilifi_301         |            |            |            |            |            |             |            |             |
| PF10_0342_Kilifi_302         |            |            |            |            |            |             |            |             |
| PF10_0342_Kilifi_304         |            |            |            |            |            |             |            |             |
| PF10_0342_Kilifi_307         |            |            |            |            |            |             |            |             |
| PF10_0342_Kilifi_310         |            |            |            |            |            |             |            |             |
| PF10_0342_Kilifi_311         |            |            |            |            |            |             |            |             |
| PF10_0342_Kilifi_314         |            |            |            |            |            |             |            |             |
| PF10_0342_Kilifi_319         |            |            |            |            |            |             |            |             |
| PF10_0342_Kilifi_321         |            |            |            |            |            |             |            |             |
| PF10_0342_Kilifi_322         |            |            |            |            |            |             |            |             |
| PF10_0342_Kilifi_323         |            |            |            |            |            |             |            |             |
| PF10_0342_Kilifi_324         |            |            |            |            |            |             |            |             |
| PF10_0342_Kilifi_328         |            |            |            |            |            |             |            | T           |
| PF10_0342_Kilifi_331         |            |            |            |            |            |             |            |             |
| PF10_0342_Kilifi_333         |            |            |            |            |            |             |            |             |
| PF10_0342_Kilifi_334         |            |            |            |            |            |             |            |             |
| PF10_0342_Kilifi_336         |            |            |            |            |            |             |            |             |
| PF10_0342_Kilifi_340         |            |            |            |            |            |             |            |             |
| PF10_0342_Kilifi_343         |            |            |            |            |            |             |            |             |
| PF10_0342_Kilifi_344         |            |            |            |            |            |             |            |             |
| PF10_0342_Kilifi_345         |            |            |            |            |            |             |            | T           |
| PF10_0342_Kilifi_348         |            |            |            |            |            |             |            |             |
| PF10_0342_Kilifi_356         |            |            |            |            |            |             |            |             |
| PF10_0342_Kilifi_359         |            |            |            |            |            |             |            |             |
| PF10_0342_Kilifi_364         |            |            |            |            |            |             |            |             |
| PF10_0342_Kilifi_365         |            |            |            |            |            |             |            |             |
| PF10_0342_Kilifi_384         |            |            |            |            |            |             |            |             |
| PF10_0342_Kilifi_389         |            |            |            |            |            |             |            |             |
| PF10_0342_Kilifi_406         |            |            |            |            |            |             |            |             |
| PF10_0342_Kilifi_510         |            |            |            |            |            |             |            | T           |
| PF10_0342_Kilifi_528         |            |            |            |            |            |             |            |             |
| <i>Plasmodium reichenowi</i> |            |            | G          |            |            |             |            |             |

|                              | 890        | 900        | 910       | 920        | 930        | 940       | 950        | 960        |
|------------------------------|------------|------------|-----------|------------|------------|-----------|------------|------------|
| PF10_0342_3D7                | TAACAATGGA | TAAATTTGAG | GCACAAAAG | AAAATACAGT | ATCTGGTGAT | GGTGACAAA | GAGGTAAAGT | AATTTATGAT |
| PF10_0342_Kilifi_020         |            |            | .G.       |            |            |           |            |            |
| PF10_0342_Kilifi_019         |            |            |           |            | .A.        |           |            |            |
| PF10_0342_Kilifi_021         |            |            | .G.       | .A.        |            |           |            |            |
| PF10_0342_Kilifi_023         |            |            |           |            | .A.        |           |            |            |
| PF10_0342_Kilifi_027         |            |            | .G.       |            |            |           |            |            |
| PF10_0342_Kilifi_028         |            |            |           |            |            |           |            |            |
| PF10_0342_Kilifi_044         |            |            |           |            |            |           |            |            |
| PF10_0342_Kilifi_045         |            |            | .G.       |            |            |           |            |            |
| PF10_0342_Kilifi_050         |            |            |           |            |            |           |            |            |
| PF10_0342_Kilifi_051         |            |            | .G.       |            |            |           |            |            |
| PF10_0342_Kilifi_052         |            |            |           |            |            |           |            |            |
| PF10_0342_Kilifi_057         |            |            |           |            | .A.        |           |            |            |
| PF10_0342_Kilifi_062         |            |            | .G.       |            |            |           |            |            |
| PF10_0342_Kilifi_082         | .G.        |            | .G.       | .T.        | .A.        |           |            |            |
| PF10_0342_Kilifi_084         |            |            |           |            |            |           |            |            |
| PF10_0342_Kilifi_091         |            |            |           |            |            |           |            |            |
| PF10_0342_Kilifi_093         |            |            |           |            |            |           |            |            |
| PF10_0342_Kilifi_097         |            |            |           |            |            |           |            |            |
| PF10_0342_Kilifi_105         |            |            |           |            |            |           |            |            |
| PF10_0342_Kilifi_110         |            |            |           |            | .A.        |           |            |            |
| PF10_0342_Kilifi_124         |            |            |           |            |            |           |            |            |
| PF10_0342_Kilifi_128         |            |            |           |            |            |           |            |            |
| PF10_0342_Kilifi_150         |            |            |           |            | .A.        |           |            |            |
| PF10_0342_Kilifi_153         |            |            |           | .T.        | .A.        |           |            |            |
| PF10_0342_Kilifi_160         |            |            | .G.       |            |            |           |            |            |
| PF10_0342_Kilifi_162         |            |            |           |            |            |           |            |            |
| PF10_0342_Kilifi_164         |            |            | .G.       |            |            |           |            |            |
| PF10_0342_Kilifi_186         |            |            | .G.       |            |            |           |            |            |
| PF10_0342_Kilifi_187         |            |            |           |            |            |           |            |            |
| PF10_0342_Kilifi_191         |            |            |           |            |            |           |            |            |
| PF10_0342_Kilifi_194         |            |            |           |            |            |           |            |            |
| PF10_0342_Kilifi_199         |            |            | .G.       |            |            |           |            |            |
| PF10_0342_Kilifi_201         |            |            |           |            |            |           |            |            |
| PF10_0342_Kilifi_202         |            |            |           |            |            |           |            |            |
| PF10_0342_Kilifi_214         |            |            | .G.       |            |            |           |            |            |
| PF10_0342_Kilifi_216         |            |            | .G.       |            |            |           |            |            |
| PF10_0342_Kilifi_235         |            |            |           |            |            |           |            |            |
| PF10_0342_Kilifi_242         |            |            | .G.       |            |            |           |            |            |
| PF10_0342_Kilifi_245         |            |            | .G.       |            |            |           |            |            |
| PF10_0342_Kilifi_249         |            |            | .G.       |            |            |           |            |            |
| PF10_0342_Kilifi_250         |            |            |           |            | .A.        |           |            |            |
| PF10_0342_Kilifi_258         |            |            |           | .T.        | .A.        |           |            |            |
| PF10_0342_Kilifi_262         |            |            | .G.       |            |            |           |            |            |
| PF10_0342_Kilifi_289         | .G.        |            | .G.       | .T.        | .A.        |           |            |            |
| PF10_0342_Kilifi_290         |            |            | .G.       |            |            |           |            |            |
| PF10_0342_Kilifi_297         |            |            | .G.       |            |            |           |            |            |
| PF10_0342_Kilifi_298         |            |            |           |            |            |           |            |            |
| PF10_0342_Kilifi_299         |            |            | .G.       |            |            |           |            |            |
| PF10_0342_Kilifi_301         |            |            |           |            |            |           |            |            |
| PF10_0342_Kilifi_302         |            |            |           |            |            |           |            |            |
| PF10_0342_Kilifi_304         | .G.        |            | .G.       | .T.        | .A.        |           |            |            |
| PF10_0342_Kilifi_307         | .G.        |            | .G.       | .T.        | .A.        |           |            |            |
| PF10_0342_Kilifi_310         |            |            |           |            |            |           |            |            |
| PF10_0342_Kilifi_311         |            |            |           |            |            |           |            |            |
| PF10_0342_Kilifi_314         | .G.        |            | .G.       | .T.        | .A.        |           |            |            |
| PF10_0342_Kilifi_319         |            |            | .G.       |            |            |           |            |            |
| PF10_0342_Kilifi_321         |            |            | .G.       |            |            |           |            |            |
| PF10_0342_Kilifi_322         |            |            |           |            |            |           |            |            |
| PF10_0342_Kilifi_323         |            |            |           |            |            |           |            |            |
| PF10_0342_Kilifi_324         | .G.        |            | .G.       | .T.        | .A.        |           |            |            |
| PF10_0342_Kilifi_328         |            |            |           |            |            |           |            |            |
| PF10_0342_Kilifi_331         |            |            |           |            |            |           |            |            |
| PF10_0342_Kilifi_333         |            |            | .G.       |            |            |           |            |            |
| PF10_0342_Kilifi_334         |            |            |           |            |            |           |            |            |
| PF10_0342_Kilifi_336         |            |            |           |            |            |           |            |            |
| PF10_0342_Kilifi_340         |            |            |           |            |            |           |            |            |
| PF10_0342_Kilifi_343         | .G.        |            | .G.       | .T.        | .A.        |           |            |            |
| PF10_0342_Kilifi_344         |            |            | .G.       |            |            |           |            |            |
| PF10_0342_Kilifi_345         |            |            |           |            | .A.        |           |            |            |
| PF10_0342_Kilifi_348         | .G.        |            | .G.       | .T.        | .A.        |           |            |            |
| PF10_0342_Kilifi_356         |            |            | .G.       |            |            |           |            |            |
| PF10_0342_Kilifi_359         |            |            |           |            |            |           |            |            |
| PF10_0342_Kilifi_364         |            |            | .G.       |            |            |           |            |            |
| PF10_0342_Kilifi_365         |            |            | .G.       |            |            |           |            |            |
| PF10_0342_Kilifi_384         |            |            | .G.       |            |            |           |            |            |
| PF10_0342_Kilifi_389         |            |            |           |            |            |           |            |            |
| PF10_0342_Kilifi_406         |            |            | .G.       |            |            |           |            |            |
| PF10_0342_Kilifi_510         |            |            |           |            | .A.        |           |            |            |
| PF10_0342_Kilifi_528         |            |            | .G.       |            |            |           |            |            |
| <i>Plasmodium reichenowi</i> | .C.        | .GG.       | .G.       | .A.        |            | .A.       | .G.        | .C.        |

|                              | 970        | 980        | 990        | 1000       | 1010       | 1020       | 1030       | 1040       |
|------------------------------|------------|------------|------------|------------|------------|------------|------------|------------|
| PF10_0342_3D7                | GAAAATGATG | ATTCCCTTAT | TTCTAATTCT | TTAGTACCCG | AAACAAGTTA | CAATCAAGAT | TACTCTTTAT | ACACTATTAA |
| PF10_0342_Kilifi_020         |            |            |            |            |            |            |            |            |
| PF10_0342_Kilifi_019         |            |            |            |            |            |            |            |            |
| PF10_0342_Kilifi_021         |            |            |            |            |            |            |            |            |
| PF10_0342_Kilifi_023         |            |            |            |            |            |            |            |            |
| PF10_0342_Kilifi_027         |            |            |            |            |            |            |            |            |
| PF10_0342_Kilifi_028         |            |            |            |            |            |            |            |            |
| PF10_0342_Kilifi_044         |            |            |            |            |            |            |            |            |
| PF10_0342_Kilifi_045         |            |            |            |            |            |            |            |            |
| PF10_0342_Kilifi_050         |            | A.T        |            | T.T        | G          |            |            |            |
| PF10_0342_Kilifi_051         |            |            |            |            |            |            |            | C          |
| PF10_0342_Kilifi_052         |            |            |            |            |            |            |            |            |
| PF10_0342_Kilifi_057         |            |            |            |            |            |            |            |            |
| PF10_0342_Kilifi_062         |            |            |            |            |            |            |            |            |
| PF10_0342_Kilifi_082         |            |            |            |            |            |            |            |            |
| PF10_0342_Kilifi_084         |            |            | T          |            | T          | G          |            |            |
| PF10_0342_Kilifi_091         |            |            |            |            |            |            |            |            |
| PF10_0342_Kilifi_093         |            |            |            |            |            |            |            |            |
| PF10_0342_Kilifi_097         |            | A.T        |            | T.T        | G          |            |            |            |
| PF10_0342_Kilifi_105         |            |            |            |            |            |            |            |            |
| PF10_0342_Kilifi_110         |            |            |            |            |            |            |            |            |
| PF10_0342_Kilifi_124         |            |            |            |            |            |            |            |            |
| PF10_0342_Kilifi_128         |            |            |            |            |            |            |            |            |
| PF10_0342_Kilifi_150         |            |            |            |            |            |            |            |            |
| PF10_0342_Kilifi_153         |            |            |            |            |            |            |            |            |
| PF10_0342_Kilifi_160         |            |            |            |            |            |            |            |            |
| PF10_0342_Kilifi_162         |            |            |            |            |            |            |            |            |
| PF10_0342_Kilifi_164         |            |            |            |            |            |            |            |            |
| PF10_0342_Kilifi_186         |            |            |            |            |            |            |            |            |
| PF10_0342_Kilifi_187         |            | A.T        |            | T          | G          |            |            |            |
| PF10_0342_Kilifi_191         |            | A.T        |            | T.T        | G          |            |            |            |
| PF10_0342_Kilifi_194         |            | A.T        |            | T.T        | G          |            |            |            |
| PF10_0342_Kilifi_199         |            |            |            |            |            |            |            |            |
| PF10_0342_Kilifi_201         |            | A.T        |            | T.T        | G          |            |            |            |
| PF10_0342_Kilifi_202         |            |            |            |            |            |            |            |            |
| PF10_0342_Kilifi_214         |            |            |            |            |            |            |            |            |
| PF10_0342_Kilifi_216         |            |            |            |            |            |            |            |            |
| PF10_0342_Kilifi_235         |            |            |            |            |            |            |            |            |
| PF10_0342_Kilifi_242         |            |            |            |            |            |            |            |            |
| PF10_0342_Kilifi_245         |            |            |            |            |            |            |            |            |
| PF10_0342_Kilifi_249         |            |            |            |            |            |            |            |            |
| PF10_0342_Kilifi_250         |            |            |            |            |            |            |            |            |
| PF10_0342_Kilifi_258         |            |            |            |            |            |            |            |            |
| PF10_0342_Kilifi_262         |            |            |            |            |            |            |            |            |
| PF10_0342_Kilifi_289         |            |            |            |            |            |            |            |            |
| PF10_0342_Kilifi_290         |            |            |            |            |            |            |            |            |
| PF10_0342_Kilifi_297         |            |            |            |            |            |            |            |            |
| PF10_0342_Kilifi_298         |            | T          |            | T.T        | G          |            |            |            |
| PF10_0342_Kilifi_299         |            |            |            |            |            |            |            |            |
| PF10_0342_Kilifi_301         |            |            |            |            |            |            |            |            |
| PF10_0342_Kilifi_302         |            |            |            |            |            |            |            |            |
| PF10_0342_Kilifi_304         |            |            |            |            |            |            |            |            |
| PF10_0342_Kilifi_307         |            |            |            |            |            |            |            |            |
| PF10_0342_Kilifi_310         |            | A.T        |            | T          | G          |            |            |            |
| PF10_0342_Kilifi_311         |            |            |            |            |            |            |            |            |
| PF10_0342_Kilifi_314         |            |            |            |            |            |            |            |            |
| PF10_0342_Kilifi_319         |            |            |            |            |            |            |            |            |
| PF10_0342_Kilifi_321         |            |            |            |            |            |            |            |            |
| PF10_0342_Kilifi_322         |            |            |            |            |            |            |            |            |
| PF10_0342_Kilifi_323         |            |            |            |            |            |            |            |            |
| PF10_0342_Kilifi_324         |            |            |            |            |            |            |            |            |
| PF10_0342_Kilifi_328         |            |            |            |            |            |            |            |            |
| PF10_0342_Kilifi_331         |            |            |            |            |            |            |            |            |
| PF10_0342_Kilifi_333         |            |            |            |            |            |            |            |            |
| PF10_0342_Kilifi_334         |            | A.T        |            | T.T        | G          |            |            |            |
| PF10_0342_Kilifi_336         |            | A.T        |            | T.T        | G          |            |            |            |
| PF10_0342_Kilifi_340         |            |            |            |            |            |            |            |            |
| PF10_0342_Kilifi_343         |            |            |            |            |            |            |            |            |
| PF10_0342_Kilifi_344         |            |            |            |            |            |            |            |            |
| PF10_0342_Kilifi_345         |            |            |            |            |            |            |            |            |
| PF10_0342_Kilifi_348         |            |            |            |            |            |            |            |            |
| PF10_0342_Kilifi_356         |            |            |            |            |            |            |            |            |
| PF10_0342_Kilifi_359         |            |            |            |            |            |            |            |            |
| PF10_0342_Kilifi_364         |            |            |            |            |            |            |            |            |
| PF10_0342_Kilifi_365         |            |            |            |            |            |            |            |            |
| PF10_0342_Kilifi_384         |            |            |            |            |            |            |            |            |
| PF10_0342_Kilifi_389         |            |            |            |            |            |            |            |            |
| PF10_0342_Kilifi_406         |            |            |            |            |            |            |            |            |
| PF10_0342_Kilifi_510         |            |            |            |            |            |            |            |            |
| PF10_0342_Kilifi_528         |            |            |            |            |            |            |            |            |
| <i>Plasmodium reichenowi</i> |            | G.T        |            | T          |            |            |            | C          |



|                              | 1130       | 1140       | 1150      | 1160       | 1170       | 1180       | 1190       | 1200       |
|------------------------------|------------|------------|-----------|------------|------------|------------|------------|------------|
| PF10_0342_3D7                | CAAAGGAAGA | GGGACCCATT | GTATCCAAA | TACACAGTGT | AAAAGAAGAA | CAAAAAGATT | ATCATAAATA | CGAAAAAAAT |
| PF10_0342_Kilifi_020         |            |            |           |            |            | G          |            |            |
| PF10_0342_Kilifi_019         |            |            |           |            |            | G          |            |            |
| PF10_0342_Kilifi_021         |            |            |           |            |            | G          |            |            |
| PF10_0342_Kilifi_023         |            |            |           |            |            | G          |            |            |
| PF10_0342_Kilifi_027         |            |            |           |            |            | G          |            |            |
| PF10_0342_Kilifi_028         |            |            |           |            |            | G          |            |            |
| PF10_0342_Kilifi_044         |            |            |           |            |            | G          |            |            |
| PF10_0342_Kilifi_045         |            |            |           |            |            | G          |            |            |
| PF10_0342_Kilifi_050         |            |            |           |            |            | G          |            |            |
| PF10_0342_Kilifi_051         |            |            |           |            |            | G          |            |            |
| PF10_0342_Kilifi_052         |            |            |           |            |            | G          |            |            |
| PF10_0342_Kilifi_057         |            |            |           |            |            | G          |            |            |
| PF10_0342_Kilifi_062         |            |            |           |            |            | G          |            |            |
| PF10_0342_Kilifi_082         |            |            |           |            |            | G          |            |            |
| PF10_0342_Kilifi_084         |            |            |           |            |            | G          |            |            |
| PF10_0342_Kilifi_091         |            |            |           |            |            | G          |            |            |
| PF10_0342_Kilifi_093         |            |            |           |            |            |            |            |            |
| PF10_0342_Kilifi_097         |            |            |           |            |            | G          |            |            |
| PF10_0342_Kilifi_105         |            |            |           |            |            | G          |            |            |
| PF10_0342_Kilifi_110         |            |            |           |            |            | G          |            |            |
| PF10_0342_Kilifi_124         |            |            |           |            |            | G          |            |            |
| PF10_0342_Kilifi_128         |            |            |           |            |            |            |            |            |
| PF10_0342_Kilifi_150         |            |            |           |            |            | G          |            |            |
| PF10_0342_Kilifi_153         |            |            |           |            |            | G          |            |            |
| PF10_0342_Kilifi_160         |            |            |           |            |            | G          |            |            |
| PF10_0342_Kilifi_162         |            |            |           |            |            | G          |            |            |
| PF10_0342_Kilifi_164         |            |            |           |            |            | G          |            |            |
| PF10_0342_Kilifi_186         |            |            |           |            |            | G          |            |            |
| PF10_0342_Kilifi_187         |            |            |           |            |            | G          |            |            |
| PF10_0342_Kilifi_191         |            |            |           |            |            | G          |            |            |
| PF10_0342_Kilifi_194         |            |            |           |            |            | G          |            |            |
| PF10_0342_Kilifi_199         |            |            |           |            |            | G          |            |            |
| PF10_0342_Kilifi_201         |            |            |           |            |            | G          |            |            |
| PF10_0342_Kilifi_202         |            |            |           |            |            | G          |            |            |
| PF10_0342_Kilifi_214         |            |            |           |            |            | G          |            |            |
| PF10_0342_Kilifi_216         |            |            |           |            |            | G          |            |            |
| PF10_0342_Kilifi_235         |            |            |           |            |            |            |            |            |
| PF10_0342_Kilifi_242         |            |            |           |            |            | G          |            |            |
| PF10_0342_Kilifi_245         |            |            |           |            |            | G          |            |            |
| PF10_0342_Kilifi_249         |            |            |           |            |            |            |            |            |
| PF10_0342_Kilifi_250         |            |            |           |            |            | G          |            |            |
| PF10_0342_Kilifi_258         |            |            |           |            |            | G          |            |            |
| PF10_0342_Kilifi_262         |            |            |           |            |            | G          |            |            |
| PF10_0342_Kilifi_289         |            |            |           |            |            |            |            |            |
| PF10_0342_Kilifi_290         |            |            |           |            |            | G          |            |            |
| PF10_0342_Kilifi_297         |            |            |           |            |            | G          |            |            |
| PF10_0342_Kilifi_298         |            |            |           |            |            | G          |            |            |
| PF10_0342_Kilifi_299         |            |            |           |            |            | G          |            |            |
| PF10_0342_Kilifi_301         |            |            |           |            |            | G          |            |            |
| PF10_0342_Kilifi_302         |            |            |           |            |            |            |            |            |
| PF10_0342_Kilifi_304         |            |            |           |            |            | G          |            |            |
| PF10_0342_Kilifi_307         |            |            |           |            |            | G          |            |            |
| PF10_0342_Kilifi_310         |            |            |           |            |            | G          |            |            |
| PF10_0342_Kilifi_311         |            |            |           |            |            |            |            |            |
| PF10_0342_Kilifi_314         |            |            |           |            |            | G          |            |            |
| PF10_0342_Kilifi_319         |            |            |           |            |            | G          |            |            |
| PF10_0342_Kilifi_321         |            |            |           |            |            | G          |            |            |
| PF10_0342_Kilifi_322         |            |            |           |            |            | G          |            |            |
| PF10_0342_Kilifi_323         |            |            |           |            |            | G          |            |            |
| PF10_0342_Kilifi_324         |            |            |           |            |            | G          |            |            |
| PF10_0342_Kilifi_328         |            |            |           |            |            | G          |            |            |
| PF10_0342_Kilifi_331         |            |            |           |            |            | G          |            |            |
| PF10_0342_Kilifi_333         |            |            |           |            |            | G          |            |            |
| PF10_0342_Kilifi_334         |            |            |           |            |            | G          |            |            |
| PF10_0342_Kilifi_336         |            |            |           |            |            | G          |            |            |
| PF10_0342_Kilifi_340         |            |            |           |            |            |            |            |            |
| PF10_0342_Kilifi_343         |            |            |           |            |            | G          |            |            |
| PF10_0342_Kilifi_344         |            |            |           |            |            | G          |            |            |
| PF10_0342_Kilifi_345         |            |            |           |            |            | G          |            |            |
| PF10_0342_Kilifi_348         |            |            |           |            |            |            |            |            |
| PF10_0342_Kilifi_356         |            |            |           |            |            | G          |            |            |
| PF10_0342_Kilifi_359         |            |            |           |            |            | G          |            |            |
| PF10_0342_Kilifi_364         |            |            |           |            |            | G          |            |            |
| PF10_0342_Kilifi_365         |            |            |           |            |            | G          |            |            |
| PF10_0342_Kilifi_384         |            |            |           |            |            | G          |            |            |
| PF10_0342_Kilifi_389         |            |            |           |            |            | G          |            |            |
| PF10_0342_Kilifi_406         |            |            |           |            |            | G          |            |            |
| PF10_0342_Kilifi_510         |            |            |           |            |            | G          |            |            |
| PF10_0342_Kilifi_528         |            |            |           |            |            | G          |            |            |
| <i>Plasmodium reichenowi</i> | ...A...    |            | ...A...T  |            |            |            |            |            |



|                              | 1210       | 1220       | 1230       | 1240       | 1250       | 1260       | 1270       | 1280       |
|------------------------------|------------|------------|------------|------------|------------|------------|------------|------------|
| PF10_0342_3D7                | ATATTACACG | GAACGAAAAA | AAAGAGTGAA | AAAGTATATG | ATCTATATGA | TTATATATTA | AATTGGGTAT | TTGGTCCCAT |
| PF10_0342_Kilifi_020         | G          |            |            |            |            |            |            |            |
| PF10_0342_Kilifi_019         |            |            |            |            |            |            |            |            |
| PF10_0342_Kilifi_021         |            |            |            |            |            | C          |            |            |
| PF10_0342_Kilifi_023         |            |            |            |            |            |            |            |            |
| PF10_0342_Kilifi_027         |            |            |            |            |            |            | T          |            |
| PF10_0342_Kilifi_028         |            |            |            |            |            |            |            |            |
| PF10_0342_Kilifi_044         |            |            |            |            |            |            |            |            |
| PF10_0342_Kilifi_045         |            |            |            |            |            |            |            |            |
| PF10_0342_Kilifi_050         |            |            |            |            |            |            |            |            |
| PF10_0342_Kilifi_051         | G          |            |            |            |            |            |            |            |
| PF10_0342_Kilifi_052         | A          |            |            |            |            | C          |            |            |
| PF10_0342_Kilifi_057         | G          |            |            |            |            |            |            |            |
| PF10_0342_Kilifi_062         |            |            |            |            |            |            |            |            |
| PF10_0342_Kilifi_082         |            |            |            |            |            |            |            |            |
| PF10_0342_Kilifi_084         | G          |            |            |            |            |            |            |            |
| PF10_0342_Kilifi_091         |            |            |            |            |            |            |            |            |
| PF10_0342_Kilifi_093         |            |            |            |            |            |            |            |            |
| PF10_0342_Kilifi_097         | G          |            |            |            |            |            |            |            |
| PF10_0342_Kilifi_105         | A          |            |            |            |            | C          |            |            |
| PF10_0342_Kilifi_110         | G          |            |            |            |            |            |            |            |
| PF10_0342_Kilifi_124         | G          |            |            |            |            |            |            |            |
| PF10_0342_Kilifi_128         |            |            |            |            |            |            |            |            |
| PF10_0342_Kilifi_150         | G          |            |            |            |            |            |            |            |
| PF10_0342_Kilifi_153         |            |            |            |            |            |            |            |            |
| PF10_0342_Kilifi_160         |            |            |            |            |            |            |            |            |
| PF10_0342_Kilifi_162         |            |            |            |            |            |            |            |            |
| PF10_0342_Kilifi_164         | G          |            |            |            |            |            |            |            |
| PF10_0342_Kilifi_186         |            |            |            |            |            |            |            |            |
| PF10_0342_Kilifi_187         | G          |            |            |            |            |            |            |            |
| PF10_0342_Kilifi_191         |            |            |            |            |            |            |            |            |
| PF10_0342_Kilifi_194         | G          |            |            |            |            |            |            |            |
| PF10_0342_Kilifi_199         | G          |            |            |            |            |            |            |            |
| PF10_0342_Kilifi_201         | G          |            |            |            |            |            |            |            |
| PF10_0342_Kilifi_202         |            |            |            |            |            |            |            |            |
| PF10_0342_Kilifi_214         | A          |            |            |            |            | C          |            |            |
| PF10_0342_Kilifi_216         | G          |            |            |            |            |            |            |            |
| PF10_0342_Kilifi_235         |            |            |            |            |            |            |            |            |
| PF10_0342_Kilifi_242         |            |            |            |            |            |            |            |            |
| PF10_0342_Kilifi_245         |            |            |            |            |            |            |            |            |
| PF10_0342_Kilifi_249         |            |            |            |            |            |            |            |            |
| PF10_0342_Kilifi_250         | G          |            |            |            |            |            |            |            |
| PF10_0342_Kilifi_258         |            |            |            |            |            |            |            |            |
| PF10_0342_Kilifi_262         |            |            |            |            |            | C          |            |            |
| PF10_0342_Kilifi_289         |            |            |            |            |            |            |            |            |
| PF10_0342_Kilifi_290         |            |            |            |            |            | C          |            |            |
| PF10_0342_Kilifi_297         |            |            |            |            |            |            |            |            |
| PF10_0342_Kilifi_298         |            |            |            |            |            |            |            |            |
| PF10_0342_Kilifi_299         |            |            |            |            |            |            |            |            |
| PF10_0342_Kilifi_301         |            |            |            |            |            |            | T          |            |
| PF10_0342_Kilifi_302         |            |            |            |            |            |            |            |            |
| PF10_0342_Kilifi_304         |            |            |            |            |            |            |            |            |
| PF10_0342_Kilifi_307         |            |            |            |            |            |            |            |            |
| PF10_0342_Kilifi_310         | G          |            |            |            |            |            |            |            |
| PF10_0342_Kilifi_311         |            |            |            |            |            |            |            |            |
| PF10_0342_Kilifi_314         |            |            |            |            |            |            |            |            |
| PF10_0342_Kilifi_319         | A          |            |            |            |            | C          |            |            |
| PF10_0342_Kilifi_321         |            |            |            |            |            |            |            |            |
| PF10_0342_Kilifi_322         |            |            |            |            |            |            |            |            |
| PF10_0342_Kilifi_323         |            |            |            |            |            |            |            |            |
| PF10_0342_Kilifi_324         |            |            |            |            |            |            |            |            |
| PF10_0342_Kilifi_328         |            |            |            |            |            |            |            |            |
| PF10_0342_Kilifi_331         |            |            |            |            |            |            |            |            |
| PF10_0342_Kilifi_333         |            |            |            |            |            |            | T          |            |
| PF10_0342_Kilifi_334         | G          |            |            |            |            |            |            |            |
| PF10_0342_Kilifi_336         |            |            |            |            |            |            |            |            |
| PF10_0342_Kilifi_340         |            |            |            |            |            |            |            |            |
| PF10_0342_Kilifi_343         |            |            |            |            |            |            |            |            |
| PF10_0342_Kilifi_344         |            |            |            |            |            |            | T          |            |
| PF10_0342_Kilifi_345         | G          |            |            |            |            |            |            |            |
| PF10_0342_Kilifi_348         |            |            |            |            |            |            |            |            |
| PF10_0342_Kilifi_356         |            |            |            |            |            |            |            |            |
| PF10_0342_Kilifi_359         |            |            |            |            |            |            |            |            |
| PF10_0342_Kilifi_364         |            |            |            |            |            |            | T          |            |
| PF10_0342_Kilifi_365         | G          |            |            |            |            |            |            |            |
| PF10_0342_Kilifi_384         |            |            |            |            |            |            |            |            |
| PF10_0342_Kilifi_389         |            |            |            |            |            |            |            |            |
| PF10_0342_Kilifi_406         |            |            |            |            |            |            |            |            |
| PF10_0342_Kilifi_510         | G          |            |            |            |            |            |            |            |
| PF10_0342_Kilifi_528         | G          | A          | GG         |            |            |            |            |            |
| <i>Plasmodium reichenowi</i> | G          | A          | GG         |            |            |            |            |            |

|                      | 1290       | 1300       | 1310       | 1320       | 1330       | 1340       | 1350       | 1360       |
|----------------------|------------|------------|------------|------------|------------|------------|------------|------------|
| PF10_0342_3D7        | GAAAATTACT | GAAACAAATG | TTTCTGAACA | AAATGATTCT | TTAGAATTAA | AACAAAGGAC | GTCATGGGAT | AGAACAAATA |
| PF10_0342_Kilifi_020 |            |            | A          | A          | G          |            |            |            |
| PF10_0342_Kilifi_019 |            |            | A          | A          | G          |            |            |            |
| PF10_0342_Kilifi_021 |            |            | A          | A          | G          |            |            |            |
| PF10_0342_Kilifi_023 |            |            | A          | A          | G          |            |            |            |
| PF10_0342_Kilifi_027 |            |            | A          | A          | G          |            |            |            |
| PF10_0342_Kilifi_028 |            |            | A          | A          | G          |            |            |            |
| PF10_0342_Kilifi_044 |            |            |            |            |            |            |            |            |
| PF10_0342_Kilifi_045 |            |            | A          | A          | G          |            |            |            |
| PF10_0342_Kilifi_050 |            |            | A          | A          | G          |            |            |            |
| PF10_0342_Kilifi_051 |            |            | A          | A          | G          |            |            |            |
| PF10_0342_Kilifi_052 |            |            | A          | A          | G          |            |            |            |
| PF10_0342_Kilifi_057 |            |            | A          | A          | G          |            |            |            |
| PF10_0342_Kilifi_062 |            |            | A          | A          | G          |            |            |            |
| PF10_0342_Kilifi_082 |            |            | A          | A          | G          |            |            |            |
| PF10_0342_Kilifi_084 |            |            | A          | A          | G          |            |            |            |
| PF10_0342_Kilifi_091 |            |            | A          | A          | G          |            |            |            |
| PF10_0342_Kilifi_093 |            |            | A          | A          | G          |            |            |            |
| PF10_0342_Kilifi_097 |            |            |            |            |            |            |            |            |
| PF10_0342_Kilifi_105 |            |            | A          | A          | G          |            |            |            |
| PF10_0342_Kilifi_110 |            |            | A          | A          | G          |            |            |            |
| PF10_0342_Kilifi_124 |            |            | T          | A          | G          |            |            |            |
| PF10_0342_Kilifi_128 |            |            |            |            |            |            |            |            |
| PF10_0342_Kilifi_150 |            |            | A          | A          | G          |            |            |            |
| PF10_0342_Kilifi_153 |            |            | A          | A          | G          |            |            |            |
| PF10_0342_Kilifi_160 |            |            | A          | A          | G          |            |            |            |
| PF10_0342_Kilifi_162 |            |            | A          | A          | G          |            |            |            |
| PF10_0342_Kilifi_164 |            |            | A          | A          | G          |            |            |            |
| PF10_0342_Kilifi_186 |            |            | A          | A          | G          |            |            |            |
| PF10_0342_Kilifi_187 |            |            | A          | A          | G          |            |            |            |
| PF10_0342_Kilifi_191 |            |            | A          | A          | G          |            |            |            |
| PF10_0342_Kilifi_194 |            |            | A          | A          | G          |            |            |            |
| PF10_0342_Kilifi_199 |            |            | A          | A          | G          |            |            |            |
| PF10_0342_Kilifi_201 |            |            | A          | A          | G          |            |            |            |
| PF10_0342_Kilifi_202 |            |            | A          | A          | G          |            |            |            |
| PF10_0342_Kilifi_214 |            |            | A          | A          | G          |            |            |            |
| PF10_0342_Kilifi_216 |            |            | A          | A          | G          |            |            |            |
| PF10_0342_Kilifi_235 |            |            | A          | A          | G          |            |            |            |
| PF10_0342_Kilifi_242 |            |            | A          | A          | G          |            |            |            |
| PF10_0342_Kilifi_245 |            |            | A          | A          | G          |            |            |            |
| PF10_0342_Kilifi_249 |            |            |            |            |            |            |            |            |
| PF10_0342_Kilifi_250 |            |            | A          | A          | G          |            |            |            |
| PF10_0342_Kilifi_258 |            |            | A          | A          | G          |            |            |            |
| PF10_0342_Kilifi_262 |            |            | A          | A          | G          |            |            |            |
| PF10_0342_Kilifi_289 |            |            | A          | A          | G          |            |            |            |
| PF10_0342_Kilifi_290 |            |            | A          | A          | G          |            |            |            |
| PF10_0342_Kilifi_297 |            |            | A          | A          | G          |            |            |            |
| PF10_0342_Kilifi_298 |            |            | A          | A          | G          |            |            |            |
| PF10_0342_Kilifi_299 |            |            | A          | A          | G          |            |            |            |
| PF10_0342_Kilifi_301 |            |            | A          | A          | G          |            |            |            |
| PF10_0342_Kilifi_302 |            |            |            |            |            |            |            |            |
| PF10_0342_Kilifi_304 |            |            | A          | A          | G          |            |            |            |
| PF10_0342_Kilifi_307 |            |            | A          | A          | G          |            |            |            |
| PF10_0342_Kilifi_310 |            |            | A          | A          | G          |            |            |            |
| PF10_0342_Kilifi_311 |            |            | A          | A          | G          |            |            |            |
| PF10_0342_Kilifi_314 |            |            | A          | A          | G          |            |            |            |
| PF10_0342_Kilifi_319 |            |            | A          | A          | G          |            |            |            |
| PF10_0342_Kilifi_321 |            |            | A          | A          | G          |            |            |            |
| PF10_0342_Kilifi_322 |            |            | A          | A          | G          |            |            |            |
| PF10_0342_Kilifi_323 |            |            | A          | A          | G          |            |            |            |
| PF10_0342_Kilifi_324 |            |            | A          | A          | G          |            |            |            |
| PF10_0342_Kilifi_328 |            |            | A          | A          | G          |            |            |            |
| PF10_0342_Kilifi_331 |            |            | A          | A          | G          |            |            |            |
| PF10_0342_Kilifi_333 |            |            | A          | A          | G          |            |            |            |
| PF10_0342_Kilifi_334 |            |            | A          | A          | G          |            |            |            |
| PF10_0342_Kilifi_336 |            |            | A          | A          | G          |            |            |            |
| PF10_0342_Kilifi_340 |            |            |            |            |            |            |            |            |
| PF10_0342_Kilifi_343 |            |            | A          | A          | G          |            |            |            |
| PF10_0342_Kilifi_344 |            |            | A          | A          | G          |            |            |            |
| PF10_0342_Kilifi_345 |            |            | A          | A          | G          |            |            |            |
| PF10_0342_Kilifi_348 |            |            | A          | A          | G          |            |            |            |
| PF10_0342_Kilifi_356 |            |            | A          | A          | G          |            |            |            |
| PF10_0342_Kilifi_359 |            |            | A          | A          | G          |            |            |            |
| PF10_0342_Kilifi_364 |            |            | A          | A          | G          |            |            |            |
| PF10_0342_Kilifi_365 |            |            | A          | A          | G          |            |            |            |
| PF10_0342_Kilifi_384 |            |            | A          | A          | G          |            |            |            |
| PF10_0342_Kilifi_389 |            |            | A          | A          | G          |            |            |            |
| PF10_0342_Kilifi_406 |            |            |            |            |            |            |            |            |
| PF10_0342_Kilifi_510 |            |            | A          | A          | G          |            |            |            |
| PF10_0342_Kilifi_528 |            |            | A          | A          | G          |            |            |            |

*Plasmodium reichenowi*

|                              | 1370       | 1380       | 1390       | 1400       | 1410       | 1420       | 1430       | 1440       |
|------------------------------|------------|------------|------------|------------|------------|------------|------------|------------|
| PF10_0342_3D7                | TAATTAGTGA | AAATGAAGAA | GAAGATGATA | TAAATAATGT | TGAACAATTA | AACGAGATTC | AAGGTGAAAT | AACGGAAGAC |
| PF10_0342_Kilifi_020         |            |            | .G.        |            |            |            |            |            |
| PF10_0342_Kilifi_019         |            |            | .G.        |            |            |            |            |            |
| PF10_0342_Kilifi_021         |            |            | .G.        |            |            |            |            |            |
| PF10_0342_Kilifi_023         |            |            | .G.        |            |            |            |            |            |
| PF10_0342_Kilifi_027         |            |            |            |            |            |            |            |            |
| PF10_0342_Kilifi_028         |            |            |            |            |            |            |            |            |
| PF10_0342_Kilifi_044         |            |            |            |            |            |            |            |            |
| PF10_0342_Kilifi_045         |            |            | .G.        |            |            |            |            |            |
| PF10_0342_Kilifi_050         |            |            | .G.        |            |            |            |            |            |
| PF10_0342_Kilifi_051         |            |            | .G.        |            |            |            |            |            |
| PF10_0342_Kilifi_052         |            |            | .G.        |            |            |            |            |            |
| PF10_0342_Kilifi_057         |            |            | .G.        |            |            |            |            |            |
| PF10_0342_Kilifi_062         |            |            |            |            |            |            |            |            |
| PF10_0342_Kilifi_082         |            |            | .G.        |            |            |            |            |            |
| PF10_0342_Kilifi_084         |            |            | .G.        |            |            |            |            |            |
| PF10_0342_Kilifi_091         |            |            | .G.        |            |            |            |            |            |
| PF10_0342_Kilifi_093         |            |            | .G.        |            |            |            |            |            |
| PF10_0342_Kilifi_097         |            |            |            |            |            |            |            |            |
| PF10_0342_Kilifi_105         |            |            | .G.        |            |            |            |            |            |
| PF10_0342_Kilifi_110         |            |            | .G.        |            |            |            |            |            |
| PF10_0342_Kilifi_124         |            |            | .G.        |            |            |            |            |            |
| PF10_0342_Kilifi_128         |            |            |            |            |            |            |            |            |
| PF10_0342_Kilifi_150         |            |            | .G.        |            |            |            |            |            |
| PF10_0342_Kilifi_153         |            |            |            |            |            |            |            |            |
| PF10_0342_Kilifi_160         |            |            | .G.        |            |            |            |            |            |
| PF10_0342_Kilifi_162         |            |            |            |            |            |            |            |            |
| PF10_0342_Kilifi_164         |            |            | .G.        |            |            |            |            |            |
| PF10_0342_Kilifi_186         |            |            |            |            |            |            |            |            |
| PF10_0342_Kilifi_187         |            |            | .G.        |            |            |            |            |            |
| PF10_0342_Kilifi_191         |            |            | .G.        |            |            |            |            |            |
| PF10_0342_Kilifi_194         |            |            | .G.        |            |            |            |            |            |
| PF10_0342_Kilifi_199         |            |            | .G.        |            |            |            |            |            |
| PF10_0342_Kilifi_201         |            |            | .G.        |            |            |            |            |            |
| PF10_0342_Kilifi_202         |            |            | .G.        |            |            |            |            |            |
| PF10_0342_Kilifi_214         |            |            | .G.        |            |            |            |            |            |
| PF10_0342_Kilifi_216         |            |            | .G.        |            |            |            |            |            |
| PF10_0342_Kilifi_235         |            |            | .G.        |            |            |            |            |            |
| PF10_0342_Kilifi_242         |            |            | .G.        |            |            |            |            |            |
| PF10_0342_Kilifi_245         |            |            | .G.        |            |            |            |            |            |
| PF10_0342_Kilifi_249         |            |            |            |            |            |            |            |            |
| PF10_0342_Kilifi_250         |            |            | .G.        |            |            |            |            |            |
| PF10_0342_Kilifi_258         |            |            |            |            |            |            |            |            |
| PF10_0342_Kilifi_262         |            |            | .G.        |            |            |            |            |            |
| PF10_0342_Kilifi_289         |            |            |            |            |            |            |            |            |
| PF10_0342_Kilifi_290         |            |            | .G.        |            |            |            |            |            |
| PF10_0342_Kilifi_297         |            |            | .G.        |            |            |            |            |            |
| PF10_0342_Kilifi_298         |            |            | .G.        |            |            |            |            |            |
| PF10_0342_Kilifi_299         |            |            |            |            |            |            |            |            |
| PF10_0342_Kilifi_301         |            |            |            |            |            |            |            |            |
| PF10_0342_Kilifi_302         |            |            |            |            |            |            |            |            |
| PF10_0342_Kilifi_304         |            |            | .G.        |            |            |            |            |            |
| PF10_0342_Kilifi_307         |            |            | .G.        |            |            |            |            |            |
| PF10_0342_Kilifi_310         |            |            | .G.        |            |            |            |            |            |
| PF10_0342_Kilifi_311         |            |            | .G.        |            |            |            |            |            |
| PF10_0342_Kilifi_314         |            |            |            |            |            |            |            |            |
| PF10_0342_Kilifi_319         |            |            | .G.        |            |            |            |            |            |
| PF10_0342_Kilifi_321         |            |            | .G.        |            |            |            |            |            |
| PF10_0342_Kilifi_322         |            |            | .G.        |            |            |            |            |            |
| PF10_0342_Kilifi_323         |            |            |            |            |            |            |            |            |
| PF10_0342_Kilifi_324         |            |            |            |            |            |            |            |            |
| PF10_0342_Kilifi_328         |            |            | .G.        |            |            |            |            |            |
| PF10_0342_Kilifi_331         |            |            | .G.        |            |            |            |            |            |
| PF10_0342_Kilifi_333         |            |            |            |            |            |            |            |            |
| PF10_0342_Kilifi_334         |            |            | .G.        |            |            |            |            |            |
| PF10_0342_Kilifi_336         |            |            | .G.        |            |            |            |            |            |
| PF10_0342_Kilifi_340         |            |            |            |            |            |            |            |            |
| PF10_0342_Kilifi_343         |            |            | .G.        |            |            |            |            |            |
| PF10_0342_Kilifi_344         |            |            | .G.        |            |            |            |            |            |
| PF10_0342_Kilifi_345         |            |            | .G.        |            |            |            |            |            |
| PF10_0342_Kilifi_348         |            |            |            |            |            |            |            |            |
| PF10_0342_Kilifi_356         |            |            | .G.        |            |            |            |            |            |
| PF10_0342_Kilifi_359         |            |            | .G.        |            |            |            |            |            |
| PF10_0342_Kilifi_364         |            |            |            |            |            |            |            |            |
| PF10_0342_Kilifi_365         |            |            | .G.        |            |            |            |            |            |
| PF10_0342_Kilifi_384         |            |            |            |            |            |            |            |            |
| PF10_0342_Kilifi_389         |            |            |            |            |            |            |            |            |
| PF10_0342_Kilifi_406         |            |            |            |            |            |            |            |            |
| PF10_0342_Kilifi_510         |            |            | .G.        |            |            |            |            |            |
| PF10_0342_Kilifi_528         |            |            | .G.        |            |            |            |            |            |
| <i>Plasmodium reichenowi</i> |            |            | A          | .G.        |            |            |            |            |

|                              | 1450       | 1460       | 1470       | 1480       | 1490       | 1500       | 1510       | 1520      |
|------------------------------|------------|------------|------------|------------|------------|------------|------------|-----------|
| PF10_0342_3D7                | GAAGTTGAAG | AGGAAAAAGA | AGAAATTATT | GAAGAAGAGG | AATATGTGGA | TGAGCAAAAA | ATGGTGAATA | AAAAAAAAT |
| PF10_0342_Kilifi_020         |            |            |            |            |            |            |            |           |
| PF10_0342_Kilifi_019         |            |            |            |            |            |            |            |           |
| PF10_0342_Kilifi_021         |            |            |            |            |            |            |            |           |
| PF10_0342_Kilifi_023         |            |            |            |            |            |            |            |           |
| PF10_0342_Kilifi_027         |            |            |            |            |            |            |            |           |
| PF10_0342_Kilifi_028         |            |            |            |            |            |            |            |           |
| PF10_0342_Kilifi_044         |            |            |            |            |            |            |            |           |
| PF10_0342_Kilifi_045         |            |            |            |            |            |            |            |           |
| PF10_0342_Kilifi_050         |            |            |            |            |            |            |            |           |
| PF10_0342_Kilifi_051         |            |            |            |            |            |            |            |           |
| PF10_0342_Kilifi_052         |            |            |            |            |            |            |            |           |
| PF10_0342_Kilifi_057         |            |            |            |            |            |            |            |           |
| PF10_0342_Kilifi_062         |            |            |            |            |            |            |            |           |
| PF10_0342_Kilifi_082         |            |            |            |            |            |            |            |           |
| PF10_0342_Kilifi_084         |            |            |            |            |            |            |            |           |
| PF10_0342_Kilifi_091         |            |            |            |            |            |            |            |           |
| PF10_0342_Kilifi_093         |            |            |            |            |            |            |            |           |
| PF10_0342_Kilifi_097         |            |            |            |            |            |            |            |           |
| PF10_0342_Kilifi_105         |            |            |            |            |            |            |            |           |
| PF10_0342_Kilifi_110         |            |            |            |            |            |            |            |           |
| PF10_0342_Kilifi_124         |            |            |            |            |            |            |            |           |
| PF10_0342_Kilifi_128         |            |            |            |            |            |            |            |           |
| PF10_0342_Kilifi_150         |            |            |            |            |            |            |            |           |
| PF10_0342_Kilifi_153         |            |            |            |            |            |            |            |           |
| PF10_0342_Kilifi_160         |            |            |            |            |            |            |            |           |
| PF10_0342_Kilifi_162         |            |            |            |            |            |            |            |           |
| PF10_0342_Kilifi_164         |            |            |            |            |            |            |            |           |
| PF10_0342_Kilifi_186         |            |            |            |            |            |            |            |           |
| PF10_0342_Kilifi_187         |            |            |            |            |            |            |            |           |
| PF10_0342_Kilifi_191         |            |            |            |            |            |            |            |           |
| PF10_0342_Kilifi_194         |            |            |            |            |            |            |            |           |
| PF10_0342_Kilifi_199         |            |            |            |            |            |            |            |           |
| PF10_0342_Kilifi_201         |            |            |            |            |            |            |            |           |
| PF10_0342_Kilifi_202         |            |            |            |            |            |            |            |           |
| PF10_0342_Kilifi_214         |            |            |            |            |            |            |            |           |
| PF10_0342_Kilifi_216         |            |            |            |            |            |            |            |           |
| PF10_0342_Kilifi_235         |            |            |            |            |            |            |            |           |
| PF10_0342_Kilifi_242         |            |            |            |            |            |            |            |           |
| PF10_0342_Kilifi_245         |            |            |            |            |            |            |            |           |
| PF10_0342_Kilifi_249         |            |            |            |            |            |            |            |           |
| PF10_0342_Kilifi_250         |            |            |            |            |            |            |            |           |
| PF10_0342_Kilifi_258         |            |            |            |            |            |            |            |           |
| PF10_0342_Kilifi_262         |            |            |            |            |            |            |            |           |
| PF10_0342_Kilifi_289         |            |            |            |            |            |            |            |           |
| PF10_0342_Kilifi_290         |            |            |            |            |            |            |            |           |
| PF10_0342_Kilifi_297         |            |            |            |            |            |            |            |           |
| PF10_0342_Kilifi_298         |            |            |            |            |            |            |            |           |
| PF10_0342_Kilifi_299         |            |            |            |            |            |            |            |           |
| PF10_0342_Kilifi_301         |            |            |            |            |            |            |            |           |
| PF10_0342_Kilifi_302         |            |            |            |            |            |            |            |           |
| PF10_0342_Kilifi_304         |            |            |            |            |            |            |            |           |
| PF10_0342_Kilifi_307         |            |            |            |            |            |            |            |           |
| PF10_0342_Kilifi_310         |            |            |            |            |            |            |            |           |
| PF10_0342_Kilifi_311         |            |            |            |            |            |            |            |           |
| PF10_0342_Kilifi_314         |            |            |            |            |            |            |            |           |
| PF10_0342_Kilifi_319         |            |            |            |            |            |            |            |           |
| PF10_0342_Kilifi_321         |            |            |            |            |            |            |            |           |
| PF10_0342_Kilifi_322         |            |            |            |            |            |            |            |           |
| PF10_0342_Kilifi_323         |            |            |            |            |            |            |            |           |
| PF10_0342_Kilifi_324         |            |            |            |            |            |            |            |           |
| PF10_0342_Kilifi_328         |            |            |            |            |            |            |            |           |
| PF10_0342_Kilifi_331         |            |            |            |            |            |            |            |           |
| PF10_0342_Kilifi_333         |            |            |            |            |            |            |            |           |
| PF10_0342_Kilifi_334         |            |            |            |            |            |            |            |           |
| PF10_0342_Kilifi_336         |            |            |            |            |            |            |            |           |
| PF10_0342_Kilifi_340         |            |            |            |            |            |            |            |           |
| PF10_0342_Kilifi_343         |            |            |            |            |            |            |            |           |
| PF10_0342_Kilifi_344         |            |            |            |            |            |            |            |           |
| PF10_0342_Kilifi_345         |            |            |            |            |            |            |            |           |
| PF10_0342_Kilifi_348         |            |            |            |            |            |            |            |           |
| PF10_0342_Kilifi_356         |            |            |            |            |            |            |            |           |
| PF10_0342_Kilifi_359         |            |            |            |            |            |            |            |           |
| PF10_0342_Kilifi_364         |            |            |            |            |            |            |            |           |
| PF10_0342_Kilifi_365         |            |            |            |            |            |            |            |           |
| PF10_0342_Kilifi_384         |            |            |            |            |            |            |            |           |
| PF10_0342_Kilifi_389         |            |            |            |            |            |            |            |           |
| PF10_0342_Kilifi_406         |            |            |            |            |            |            |            |           |
| PF10_0342_Kilifi_510         |            |            |            |            |            |            |            |           |
| PF10_0342_Kilifi_528         |            |            |            |            |            |            |            |           |
| <i>Plasmodium reichenowi</i> |            |            |            |            | G          |            |            |           |



|                              | 1610       | 1620       | 1630       | 1640      | 1650       | 1660       | 1670       | 1680              |
|------------------------------|------------|------------|------------|-----------|------------|------------|------------|-------------------|
| PF10_0342_3D7                | CGCACCTTGA | AAAATATAAT | AATATTAAGA | AAGACGTTC | AAATTTTTTT | AAAACATAAA | TAAATTTATT | TAGTGATTAT AAGTAA |
| PF10_0342_Kilifi_020         |            |            |            |           |            |            |            |                   |
| PF10_0342_Kilifi_019         |            |            |            |           |            |            |            |                   |
| PF10_0342_Kilifi_021         |            |            | A.         |           |            |            |            |                   |
| PF10_0342_Kilifi_023         |            |            |            |           |            |            |            |                   |
| PF10_0342_Kilifi_027         |            |            |            |           |            |            |            |                   |
| PF10_0342_Kilifi_028         |            |            |            |           |            |            |            |                   |
| PF10_0342_Kilifi_044         |            |            |            |           |            |            |            |                   |
| PF10_0342_Kilifi_045         |            |            |            |           |            |            |            |                   |
| PF10_0342_Kilifi_050         |            |            |            |           |            |            |            |                   |
| PF10_0342_Kilifi_051         |            |            |            |           |            |            |            |                   |
| PF10_0342_Kilifi_052         |            |            |            |           |            |            |            |                   |
| PF10_0342_Kilifi_057         |            |            |            |           |            |            |            |                   |
| PF10_0342_Kilifi_062         |            |            |            |           |            |            |            |                   |
| PF10_0342_Kilifi_082         |            |            |            |           |            |            |            |                   |
| PF10_0342_Kilifi_084         |            |            | A.         |           |            |            |            |                   |
| PF10_0342_Kilifi_091         |            |            |            |           |            |            |            |                   |
| PF10_0342_Kilifi_093         |            |            |            |           |            |            |            |                   |
| PF10_0342_Kilifi_097         |            |            |            |           |            |            |            |                   |
| PF10_0342_Kilifi_105         |            |            |            |           |            |            |            |                   |
| PF10_0342_Kilifi_110         |            |            |            |           |            |            |            |                   |
| PF10_0342_Kilifi_124         |            |            |            |           |            |            |            |                   |
| PF10_0342_Kilifi_128         |            |            |            |           |            |            |            |                   |
| PF10_0342_Kilifi_150         |            |            |            |           |            |            |            |                   |
| PF10_0342_Kilifi_153         |            |            |            |           |            |            |            |                   |
| PF10_0342_Kilifi_160         |            |            |            |           |            |            |            |                   |
| PF10_0342_Kilifi_162         |            |            |            |           |            |            |            |                   |
| PF10_0342_Kilifi_164         |            |            |            |           |            |            |            |                   |
| PF10_0342_Kilifi_186         |            |            |            |           |            |            |            |                   |
| PF10_0342_Kilifi_187         | A.         |            |            |           |            |            |            |                   |
| PF10_0342_Kilifi_191         |            |            |            |           |            |            |            |                   |
| PF10_0342_Kilifi_194         |            |            |            |           |            |            |            |                   |
| PF10_0342_Kilifi_199         |            |            |            |           |            |            |            |                   |
| PF10_0342_Kilifi_201         |            |            |            |           |            |            |            |                   |
| PF10_0342_Kilifi_202         |            |            |            |           |            |            |            |                   |
| PF10_0342_Kilifi_214         |            |            |            |           |            |            |            |                   |
| PF10_0342_Kilifi_216         |            |            |            |           |            |            |            |                   |
| PF10_0342_Kilifi_235         |            |            |            |           |            |            |            |                   |
| PF10_0342_Kilifi_242         |            |            |            |           |            |            |            |                   |
| PF10_0342_Kilifi_245         |            |            |            |           |            |            |            |                   |
| PF10_0342_Kilifi_249         |            |            |            |           |            |            |            |                   |
| PF10_0342_Kilifi_250         |            |            |            |           |            |            |            |                   |
| PF10_0342_Kilifi_258         |            |            |            |           |            |            |            |                   |
| PF10_0342_Kilifi_262         |            |            |            |           |            |            |            |                   |
| PF10_0342_Kilifi_289         |            |            |            |           |            |            |            |                   |
| PF10_0342_Kilifi_290         |            |            |            |           |            |            |            |                   |
| PF10_0342_Kilifi_297         |            |            | A.         |           |            |            |            |                   |
| PF10_0342_Kilifi_298         |            |            |            |           |            |            |            |                   |
| PF10_0342_Kilifi_299         |            |            |            |           |            |            |            |                   |
| PF10_0342_Kilifi_301         |            |            |            |           |            |            |            |                   |
| PF10_0342_Kilifi_302         |            |            |            |           |            |            |            |                   |
| PF10_0342_Kilifi_304         |            |            |            |           |            |            |            |                   |
| PF10_0342_Kilifi_307         |            |            |            |           |            |            |            |                   |
| PF10_0342_Kilifi_310         |            |            |            |           |            |            |            |                   |
| PF10_0342_Kilifi_311         |            |            |            |           |            |            |            |                   |
| PF10_0342_Kilifi_314         |            |            |            |           |            |            |            |                   |
| PF10_0342_Kilifi_319         |            |            |            |           |            |            |            |                   |
| PF10_0342_Kilifi_321         |            |            |            |           |            |            |            |                   |
| PF10_0342_Kilifi_322         |            |            |            |           |            |            |            |                   |
| PF10_0342_Kilifi_323         |            |            |            |           |            |            |            |                   |
| PF10_0342_Kilifi_324         |            |            |            |           |            |            |            |                   |
| PF10_0342_Kilifi_328         |            |            |            |           |            |            |            |                   |
| PF10_0342_Kilifi_331         |            |            |            |           |            |            |            |                   |
| PF10_0342_Kilifi_333         |            |            |            |           |            |            |            |                   |
| PF10_0342_Kilifi_334         |            |            |            |           |            |            |            |                   |
| PF10_0342_Kilifi_336         |            |            |            |           |            |            |            |                   |
| PF10_0342_Kilifi_340         |            |            |            |           |            |            |            |                   |
| PF10_0342_Kilifi_343         |            |            |            |           |            |            |            |                   |
| PF10_0342_Kilifi_344         |            |            |            | A.        |            |            |            |                   |
| PF10_0342_Kilifi_345         |            |            |            |           |            |            |            |                   |
| PF10_0342_Kilifi_348         |            |            |            |           |            |            |            |                   |
| PF10_0342_Kilifi_356         |            |            |            |           |            |            |            |                   |
| PF10_0342_Kilifi_359         |            |            |            |           |            |            |            |                   |
| PF10_0342_Kilifi_364         |            |            |            |           |            |            |            |                   |
| PF10_0342_Kilifi_365         |            |            |            |           |            |            |            |                   |
| PF10_0342_Kilifi_384         |            |            |            |           |            |            |            |                   |
| PF10_0342_Kilifi_389         |            |            |            |           |            |            |            |                   |
| PF10_0342_Kilifi_406         |            |            |            |           |            |            |            |                   |
| PF10_0342_Kilifi_510         |            |            |            |           |            |            |            |                   |
| PF10_0342_Kilifi_528         |            |            |            |           |            |            |            |                   |
| <i>Plasmodium reichenowi</i> |            |            |            | TC..T     |            |            |            |                   |



Supplementary Figure 2e

```

                10      20      30      40      50      60      70      80
.....|.....|.....|.....|.....|.....|.....|.....|.....|.....|
PF10_0348_3D7  ATGAAGAAAA TATATAGTAT TTTCTTTTCT TTATTTATTT TGAATCTCA TATATATATA AAAAATATCA AATGCAATGA
PF10_0348_Kilifi_019
PF10_0348_Kilifi_021
PF10_0348_Kilifi_023
PF10_0348_Kilifi_027
PF10_0348_Kilifi_050
PF10_0348_Kilifi_057
PF10_0348_Kilifi_062
PF10_0348_Kilifi_082
PF10_0348_Kilifi_091
PF10_0348_Kilifi_093
PF10_0348_Kilifi_097
PF10_0348_Kilifi_105
PF10_0348_Kilifi_160
PF10_0348_Kilifi_162
PF10_0348_Kilifi_186
PF10_0348_Kilifi_191
PF10_0348_Kilifi_199
PF10_0348_Kilifi_235
PF10_0348_Kilifi_242
PF10_0348_Kilifi_245
PF10_0348_Kilifi_248
PF10_0348_Kilifi_249
PF10_0348_Kilifi_262
PF10_0348_Kilifi_289
PF10_0348_Kilifi_290
PF10_0348_Kilifi_297
PF10_0348_Kilifi_299
PF10_0348_Kilifi_310
PF10_0348_Kilifi_319
PF10_0348_Kilifi_324
PF10_0348_Kilifi_333
PF10_0348_Kilifi_334
PF10_0348_Kilifi_336
PF10_0348_Kilifi_344
PF10_0348_Kilifi_345
PF10_0348_Kilifi_349
PF10_0348_Kilifi_359
PF10_0348_Kilifi_364
PF10_0348_Kilifi_389
PF10_0348_Kilifi_406
PF10_0348_Kilifi_528
PF10_0348_Kilifi_388
PF10_0348_Kilifi_365
PF10_0348_Kilifi_323
PF10_0348_Kilifi_028
PF10_0348_Kilifi_110
PF10_0348_Kilifi_128
PF10_0348_Kilifi_214
PF10_0348_Kilifi_216
PF10_0348_Kilifi_314
PF10_0348_Kilifi_384
PF10_0348_Kilifi_298
PF10_0348_Kilifi_020
PF10_0348_Kilifi_052
PF10_0348_Kilifi_164
PF10_0348_Kilifi_194
PF10_0348_Kilifi_302
PF10_0348_Kilifi_304
PF10_0348_Kilifi_311
PF10_0348_Kilifi_321
PF10_0348_Kilifi_044
PF10_0348_Kilifi_356
PF10_0348_Kilifi_045
Plasmodium reichenowi
```











|                              | 410        | 420         | 430          | 440         | 450         | 460         | 470                | 480         |
|------------------------------|------------|-------------|--------------|-------------|-------------|-------------|--------------------|-------------|
| PF10_0348_3D7                | .... ....  | .... ....   | .... ....    | .... ....   | .... ....   | .... ....   | .... ....          | .... ....   |
| PF10_0348_Kilifi_019         | ATTCTCCTCT | ACAAGGAAAT  | CATAATAAAT   | GTCCTGATGA  | AAATTTTGT   | AAGGGTATTA  | AAAATGTCTT         | ATCCTGTCCT  |
| PF10_0348_Kilifi_021         | .....      | .....       | .....        | .....       | .....       | .....       | .....C.....        | .....       |
| PF10_0348_Kilifi_023         | .....      | .....       | .....        | .....       | .....       | .....       | .....              | .....       |
| PF10_0348_Kilifi_027         | .....      | .....       | .....        | .....       | .....       | .....C..... | .....              | .....       |
| PF10_0348_Kilifi_050         | .....      | .....       | .....        | .....       | .....       | .....       | .....              | .....       |
| PF10_0348_Kilifi_057         | .....      | .....       | .....        | .....       | .....       | .....       | .....C.....        | .....       |
| PF10_0348_Kilifi_062         | .....      | .....       | .....        | .....       | .....       | .....       | .....              | .....       |
| PF10_0348_Kilifi_082         | .....      | .....       | .....        | .....       | .....       | .....       | .....              | .....       |
| PF10_0348_Kilifi_091         | .....      | .....       | .....        | .....       | .....       | .....       | .....              | .....       |
| PF10_0348_Kilifi_093         | .....      | .....       | .....        | .....       | .....       | .....       | .....C.....        | .....       |
| PF10_0348_Kilifi_097         | .....      | .....       | .....        | .....       | .....       | .....       | .....C.....        | .....       |
| PF10_0348_Kilifi_105         | .....      | .....       | .....        | .....       | .....       | .....       | .....              | .....       |
| PF10_0348_Kilifi_160         | .....      | .....A..... | .....        | .....       | .....       | .....       | .....C.....        | .....       |
| PF10_0348_Kilifi_162         | .....      | .....       | .....        | .....       | .....       | .....       | .....C.....        | .....       |
| PF10_0348_Kilifi_186         | .....      | .....       | .....        | .....       | .....       | .....       | .....C.....        | .....       |
| PF10_0348_Kilifi_191         | .....      | .....       | .....        | .....       | .....       | .....       | .....C.....        | .....       |
| PF10_0348_Kilifi_199         | .....      | .....       | .....        | .....       | .....       | .....       | .....              | .....       |
| PF10_0348_Kilifi_235         | .....      | .....       | .....        | .....       | .....       | .....       | .....C.....        | .....       |
| PF10_0348_Kilifi_242         | .....      | .....       | .....        | .....       | .....       | .....       | .....              | .....       |
| PF10_0348_Kilifi_245         | .....      | .....       | .....        | .....       | .....       | .....       | .....              | .....       |
| PF10_0348_Kilifi_248         | .....      | .....       | .....        | .....       | .....       | .....       | .....              | .....       |
| PF10_0348_Kilifi_249         | .....      | .....       | .....        | .....       | .....       | .....       | .....C.....        | .....       |
| PF10_0348_Kilifi_262         | .....      | .....       | .....        | .....       | .....       | .....       | .....              | .....       |
| PF10_0348_Kilifi_289         | .....      | .....       | .....        | .....       | .....       | .....       | .....C.....        | .....       |
| PF10_0348_Kilifi_290         | .....      | .....       | .....        | .....       | .....       | .....       | .....C.....        | .....       |
| PF10_0348_Kilifi_297         | .....      | .....       | .....        | .....       | .....       | .....       | .....              | .....       |
| PF10_0348_Kilifi_299         | .....      | .....       | .....        | .....       | .....       | .....       | .....C.....        | .....       |
| PF10_0348_Kilifi_310         | .....      | .....G..... | .....        | .....       | .....       | .....       | .....C.....        | .....       |
| PF10_0348_Kilifi_319         | .....      | .....       | .....        | .....       | .....       | .....       | .....C.....        | .....       |
| PF10_0348_Kilifi_324         | .....      | .....       | .....        | .....       | .....       | .....       | .....C.....        | .....       |
| PF10_0348_Kilifi_333         | .....      | .....       | .....        | .....       | .....       | .....       | .....              | .....       |
| PF10_0348_Kilifi_334         | .....      | .....       | .....        | .....       | .....       | .....       | .....              | .....       |
| PF10_0348_Kilifi_336         | .....      | .....       | .....        | .....       | .....       | .....C..... | .....C.....        | .....       |
| PF10_0348_Kilifi_344         | .....      | .....       | .....        | .....       | .....       | .....       | .....              | .....       |
| PF10_0348_Kilifi_345         | .....      | .....       | .....        | .....       | .....       | .....       | .....              | .....       |
| PF10_0348_Kilifi_349         | .....      | .....       | .....        | .....       | .....       | .....       | .....C.....        | .....       |
| PF10_0348_Kilifi_359         | .....      | .....       | .....        | .....       | .....       | .....       | .....              | .....       |
| PF10_0348_Kilifi_364         | .....      | .....       | .....        | .....       | .....       | .....       | .....              | .....       |
| PF10_0348_Kilifi_389         | .....      | .....       | .....        | .....       | .....       | .....       | .....              | .....       |
| PF10_0348_Kilifi_406         | .....      | .....       | .....        | .....       | .....       | .....       | .....C.....        | .....       |
| PF10_0348_Kilifi_528         | .....      | .....       | .....        | .....       | .....       | .....       | .....C.....        | .....       |
| PF10_0348_Kilifi_388         | .....      | .....       | .....        | .....       | .....       | .....       | .....C.....        | .....       |
| PF10_0348_Kilifi_365         | .....      | .....       | .....        | .....       | .....       | .....       | .....C.....        | .....       |
| PF10_0348_Kilifi_323         | .....      | .....       | .....        | .....       | .....       | .....       | .....              | .....       |
| PF10_0348_Kilifi_028         | .....      | .....       | .....        | .....       | .....       | .....       | .....              | .....       |
| PF10_0348_Kilifi_110         | .....      | .....       | .....        | .....A..... | .....T..... | .....C..... | .....GCC TAAT..... | .....       |
| PF10_0348_Kilifi_128         | .....      | .....       | .....        | .....A..... | .....T..... | .....C..... | .....GCC TAAT..... | .....       |
| PF10_0348_Kilifi_214         | .....      | .....       | .....        | .....       | .....       | .....       | .....              | .....       |
| PF10_0348_Kilifi_216         | .....      | .....       | .....        | .....       | .....       | .....       | .....              | .....       |
| PF10_0348_Kilifi_314         | .....      | .....       | .....        | .....A..... | .....T..... | .....C..... | .....GCC TAAT..... | .....       |
| PF10_0348_Kilifi_384         | .....      | .....       | .....        | .....A..... | .....T..... | .....C..... | .....GCC TAAT..... | .....       |
| PF10_0348_Kilifi_298         | .....      | .....       | .....        | .....       | .....       | .....       | .....              | .....       |
| PF10_0348_Kilifi_020         | .....      | .....       | .....        | .....       | .....       | .....       | .....              | .....       |
| PF10_0348_Kilifi_052         | .....      | .....       | .....        | .....       | .....       | .....       | .....              | .....       |
| PF10_0348_Kilifi_164         | .....      | .....       | .....        | .....       | .....       | .....       | .....              | .....       |
| PF10_0348_Kilifi_194         | .....      | .....       | .....        | .....       | .....       | .....       | .....              | .....       |
| PF10_0348_Kilifi_302         | .....      | .....       | .....        | .....       | .....       | .....       | .....              | .....       |
| PF10_0348_Kilifi_304         | .....      | .....       | .....        | .....       | .....       | .....       | .....              | .....       |
| PF10_0348_Kilifi_311         | .....      | .....       | .....        | .....       | .....       | .....       | .....              | .....       |
| PF10_0348_Kilifi_321         | .....      | .....       | .....        | .....       | .....       | .....       | .....              | .....       |
| PF10_0348_Kilifi_044         | .....      | .....       | .....        | .....       | .....       | .....       | .....              | .....       |
| PF10_0348_Kilifi_356         | .....      | .....       | .....        | .....       | .....       | .....       | .....              | .....       |
| PF10_0348_Kilifi_045         | .....      | .....       | .....        | .....       | .....       | .....       | .....              | .....       |
| <i>Plasmodium reichenowi</i> | .....      | .....       | .....AG..... | .....       | .....G..... | .....       | .....C.....        | .....T..... |

|                              | 490        | 500        | 510        | 520        | 530        | 540        | 550        | 560        |
|------------------------------|------------|------------|------------|------------|------------|------------|------------|------------|
| PF10_0348_3D7                | .....      | .....      | .....      | .....      | .....      | .....      | .....      | .....      |
| PF10_0348_Kilifi_019         | CCAAAAAATT | CTACTGGTAG | AAATGGGGAT | TGGATTAGTG | TGGCTGTTAA | AGAAAGTTCA | ACTACAAATA | AAGGTGTTCT |
| PF10_0348_Kilifi_021         | .....      | .....      | .....      | .....      | ..A.....   | .....      | .....      | .....      |
| PF10_0348_Kilifi_023         | .....      | .....      | .....      | .....      | .....      | .....      | .....      | .....      |
| PF10_0348_Kilifi_027         | .T.....    | .....      | .....      | .....      | .....      | .....      | .....      | .....      |
| PF10_0348_Kilifi_050         | .....      | .....      | .....      | .....      | .....      | .....      | .....      | .....      |
| PF10_0348_Kilifi_057         | .....      | .....      | .....      | ..A.....   | .....      | .....      | .....      | .....      |
| PF10_0348_Kilifi_062         | .....      | .....      | .....      | .....      | .....      | .....      | .....      | .....      |
| PF10_0348_Kilifi_082         | .....      | .....      | .....      | .....      | .....      | .....      | .....      | .....      |
| PF10_0348_Kilifi_091         | .....      | .....      | .....      | .....      | .....      | .....      | .....      | .....      |
| PF10_0348_Kilifi_093         | .....      | .....      | .....      | .....      | .....      | .....      | .....      | .....      |
| PF10_0348_Kilifi_097         | .....      | .....      | .....      | ..A.....   | .....      | .....      | .....      | .....      |
| PF10_0348_Kilifi_105         | .....      | .....      | .....      | .....      | .....      | .....      | .....      | .....      |
| PF10_0348_Kilifi_160         | .....      | .....      | .....      | .....      | .....      | .....      | .....      | .....      |
| PF10_0348_Kilifi_162         | .....      | .....      | .....      | .....      | .....      | .....      | .....      | .....      |
| PF10_0348_Kilifi_186         | .....      | .....      | .....      | .....      | .....      | .....      | .....      | .....      |
| PF10_0348_Kilifi_191         | .....      | .....      | .....      | .....      | .....      | .....      | .....      | .....      |
| PF10_0348_Kilifi_199         | .....      | .....      | .....      | .....      | .....      | .....      | .....      | .....      |
| PF10_0348_Kilifi_235         | .....      | .....      | .....      | .....      | .....      | .....      | .....      | .....      |
| PF10_0348_Kilifi_242         | .....      | .....      | .....      | .....      | .....      | .....      | .....      | .....      |
| PF10_0348_Kilifi_245         | .....      | .....      | .....      | .....      | .....      | .....      | .....      | .....      |
| PF10_0348_Kilifi_248         | .....      | .....      | .....      | .....      | .....      | .....      | .....      | .....      |
| PF10_0348_Kilifi_249         | .....      | .....      | .....      | .....      | .....      | .....      | .....      | .....      |
| PF10_0348_Kilifi_262         | .....      | .....      | .....      | .....      | .....      | .....      | .....      | .....      |
| PF10_0348_Kilifi_289         | .....      | .....      | .....      | .....      | .....      | .....      | .....      | .....      |
| PF10_0348_Kilifi_290         | .....      | .....      | .....      | .....      | .....      | .....      | .....      | .....      |
| PF10_0348_Kilifi_297         | .....      | .....      | .....      | .....      | .....      | .....      | .....      | .....      |
| PF10_0348_Kilifi_299         | .....      | .....      | .....      | ..A.....   | .....      | .....      | .....      | .....      |
| PF10_0348_Kilifi_310         | .....      | .....      | .....      | .....      | .....      | .....      | ..T.....   | .....      |
| PF10_0348_Kilifi_319         | .....      | .....      | .....      | .....      | .....      | .....      | .....      | .....      |
| PF10_0348_Kilifi_324         | .....      | .....      | .....      | .....      | .....      | .....      | .....      | .....      |
| PF10_0348_Kilifi_333         | .....      | .....      | .....      | .....      | .....      | .....      | .....      | .....      |
| PF10_0348_Kilifi_334         | .....      | .....      | .....      | .....      | .....      | .....      | .....      | .....      |
| PF10_0348_Kilifi_336         | .....      | .....      | .....      | .....      | .....      | .....      | .....      | .....      |
| PF10_0348_Kilifi_344         | .....      | .....      | .....      | .....      | .....      | .....      | .....      | .....      |
| PF10_0348_Kilifi_345         | .....      | .....      | .....      | .....      | .....      | .....      | .....      | .....      |
| PF10_0348_Kilifi_349         | .....      | .....      | .....      | ..A.....   | .....      | .....      | .....      | .....      |
| PF10_0348_Kilifi_359         | .....      | .....      | .....      | C.....     | .....      | .....      | .....      | .....      |
| PF10_0348_Kilifi_364         | .....      | .....      | .....      | .....      | .....      | .....      | .....      | .....      |
| PF10_0348_Kilifi_389         | .....      | .....      | .....      | .....      | .....      | .....      | .....      | .....      |
| PF10_0348_Kilifi_406         | .....      | .....      | .....      | ..A.....   | .....      | .....      | .....      | .....      |
| PF10_0348_Kilifi_528         | .....      | .....      | .....      | .....      | .....      | .....      | .....      | .....      |
| PF10_0348_Kilifi_388         | .....      | .....      | .....      | .....      | .....      | .....      | .....      | .....      |
| PF10_0348_Kilifi_365         | .....      | .....      | .....      | ..A.....   | .....      | .....      | .....      | .....      |
| PF10_0348_Kilifi_323         | .....      | .....      | .....      | .....      | .....      | .....      | .....      | .....      |
| PF10_0348_Kilifi_028         | .....      | .....      | .....      | ..GC...CT  | CAAA...C.G | .A.TTTC.T. | ..AGTT.... | .....C..   |
| PF10_0348_Kilifi_110         | .T.....    | TC.....C   | ..A..T...  | ..GC...CT  | CAAA...C.G | .A.TTTC.T. | ..AGTT.... | .....C..   |
| PF10_0348_Kilifi_128         | .T.....    | TC.....    | .....      | ..GC...CT  | CAAA...C.G | .A.TTTC.T. | ..AGTT.... | .....C..   |
| PF10_0348_Kilifi_214         | .....      | .....      | .....      | ..GC...CT  | CAAA...C.G | .A.TTTC.T. | ..AGTT.... | .....C..   |
| PF10_0348_Kilifi_216         | .....      | .....      | .....      | ..GC...CT  | CAAA...C.G | .A.TTTC.T. | ..AGTT.... | .....C..   |
| PF10_0348_Kilifi_314         | .T.....    | TC.....C   | ..A..T...  | ..GC...CT  | CAAA...C.G | .A.TTTC.T. | ..AGTT.... | .....C..   |
| PF10_0348_Kilifi_384         | .T.....    | TC.....C   | ..A..T...  | ..GC...CT  | CAAA...C.G | .A.TTTC.T. | ..AGTT.... | .....C..   |
| PF10_0348_Kilifi_298         | .....      | .....      | .....      | ..GC...CT  | CAAA...C.G | .A.TTTC.T. | ..AGTT.... | .....C..   |
| PF10_0348_Kilifi_020         | .....      | .....      | .....      | ..GC...CT  | CAAA...C.G | .A.TTTC.T. | ..AGTT.... | .....C..   |
| PF10_0348_Kilifi_052         | .....      | .....      | .....      | .....      | C.....C.G  | .A.TTTC.T. | ..AGTT.... | .....C..   |
| PF10_0348_Kilifi_164         | .....      | .....      | .....      | ..GC...CT  | CAAA...C.G | .A.TTTC.T. | ..AGTT.... | .....C..   |
| PF10_0348_Kilifi_194         | .....      | .....      | .....      | ..GC...CT  | CAAA...C.G | .A.TTTC.T. | ..AGTT.... | .....C..   |
| PF10_0348_Kilifi_302         | .....      | .....      | .....      | ..GC...CT  | CAAA...C.G | .A.TTTC.T. | ..AGTT.... | .....C..   |
| PF10_0348_Kilifi_304         | .....      | .....      | .....      | ..GC...CT  | CAAA...C.G | .A.TTTC.T. | ..AGTT.... | .....C..   |
| PF10_0348_Kilifi_311         | .....      | .....      | .....      | ..GC...CT  | CAAA...C.G | .A.TTTC.T. | ..AGTT.... | .....C..   |
| PF10_0348_Kilifi_321         | .....      | .....      | .....      | ..GC...CT  | CAAA...C.G | .A.TTTC.T. | ..AGTT.... | .....C..   |
| PF10_0348_Kilifi_044         | .....      | .....      | .....      | ..GC...CT  | CAAA...C.G | .A.TTTC.T. | ..AGTT.... | .....C..   |
| PF10_0348_Kilifi_356         | .....      | .....      | .....      | ..GC...CT  | CAAA...C.G | .A.TTTC.T. | ..AGTT.... | .....C..   |
| PF10_0348_Kilifi_045         | .....      | .....      | .....      | ..GC...CT  | CAAA...C.G | .A.TTTC.T. | ..AGTT.... | .....C..   |
| <i>Plasmodium reichenowi</i> | GA....C... | T.....     | .....      | ..A.....   | .....      | .....      | .....      | .....      |

|                              | 570       | 580       | 590          | 600          | 610           | 620            | 630             | 640             |
|------------------------------|-----------|-----------|--------------|--------------|---------------|----------------|-----------------|-----------------|
| PF10_0348_3D7                | .... .... | .... .... | .... ....    | .... ....    | .... ....     | .... ....      | .... ....       | .... ....       |
| PF10_0348_Kilifi_019         | TGTTCCCCC | AGAAGAACA | AATTATGCT    | AAGAAATATT   | AACAAGGTTT    | GGCATCGAAT     | CAAAGACGAG      | AAAAATTTTA      |
| PF10_0348_Kilifi_021         | .....     | .....A.   | .....        | .....C.      | .....         | .....          | .....           | .....           |
| PF10_0348_Kilifi_023         | .....     | .....A.   | .....        | .....C.      | .....         | .....          | .....           | .....           |
| PF10_0348_Kilifi_027         | .....     | .....A.   | .....        | .....C.      | .....         | .....          | .....           | .....           |
| PF10_0348_Kilifi_050         | .....     | .....A.   | .....        | .....C.      | .....         | .....          | .....           | .....           |
| PF10_0348_Kilifi_057         | .....     | .....     | .....        | .....        | .....         | .....          | .....           | .....           |
| PF10_0348_Kilifi_062         | .....     | .....     | .....        | .....C.      | .....         | .....          | .....           | .....           |
| PF10_0348_Kilifi_082         | .....     | .....     | .....        | .....        | .....         | .....          | .....           | .....           |
| PF10_0348_Kilifi_091         | .....     | .....A.   | .....        | .....C.      | .....         | .....          | .....           | .....           |
| PF10_0348_Kilifi_093         | .....     | .....A.   | .....        | .....C.      | .....         | .....          | .....           | .....           |
| PF10_0348_Kilifi_097         | .....     | .....     | .....        | .....        | .....         | .....          | .....           | .....           |
| PF10_0348_Kilifi_105         | .....     | .....A.   | .....        | .....C.      | .....         | .....          | .....           | .....           |
| PF10_0348_Kilifi_160         | .....     | .....A.   | .....        | .....C.      | .....         | .....          | .....           | .....           |
| PF10_0348_Kilifi_162         | .....     | .....A.   | .....        | .....C.      | .....         | .....          | .....           | .....           |
| PF10_0348_Kilifi_186         | .....     | .....A.   | .....        | .....        | .....         | .....          | .....           | .....           |
| PF10_0348_Kilifi_191         | .....     | .....A.   | .....        | .....C.      | .....         | .....          | .....           | .....           |
| PF10_0348_Kilifi_199         | .....     | .....A.   | .....        | .....C.      | .....         | .....          | .....           | .....           |
| PF10_0348_Kilifi_235         | .....     | .....A.   | .....        | .....C.      | .....         | .....          | .....           | .....           |
| PF10_0348_Kilifi_242         | .....     | .....A.   | .....        | .....C.      | .....         | .....          | .....           | .....           |
| PF10_0348_Kilifi_245         | .....     | .....     | .....        | .....        | .....         | .....          | .....           | .....           |
| PF10_0348_Kilifi_248         | .....     | .....A.   | .....        | .....C.      | .....         | .....          | .....           | .....           |
| PF10_0348_Kilifi_249         | .....     | .....A.   | .....        | .....C.      | .....         | .....          | .....           | .....           |
| PF10_0348_Kilifi_262         | .....     | .....     | .....        | .....        | .....         | .....          | .....           | .....           |
| PF10_0348_Kilifi_289         | .....     | .....A.   | .....        | .....C.      | .....         | .....          | .....           | .....           |
| PF10_0348_Kilifi_290         | .....     | .....A.   | .....        | .....C.      | .....         | .....          | .....           | .....           |
| PF10_0348_Kilifi_297         | .....     | .....A.   | .....        | .....C.      | .....         | .....          | .....           | .....           |
| PF10_0348_Kilifi_299         | .....     | .....     | .....        | .....        | .....         | .....          | .....           | .....           |
| PF10_0348_Kilifi_310         | .....     | .....     | .....        | .....        | .....         | .....          | .....           | .....           |
| PF10_0348_Kilifi_319         | .....     | .....A.   | .....        | .....C.      | .....         | .....          | .....           | .....           |
| PF10_0348_Kilifi_324         | .....     | .....A.   | .....        | .....C.      | .....         | .....          | .....           | .....           |
| PF10_0348_Kilifi_333         | .....     | .....A.   | .....        | .....C.      | .....         | .....          | .....           | .....           |
| PF10_0348_Kilifi_334         | .....     | .....     | .....        | .....        | .....         | .....          | .....           | .....           |
| PF10_0348_Kilifi_336         | .....     | .....     | .....        | .....        | .....         | .....          | .....           | .....           |
| PF10_0348_Kilifi_344         | .....     | .....     | .....        | .....        | .....         | .....          | .....           | .....           |
| PF10_0348_Kilifi_345         | .....     | .....     | .....        | .....        | .....         | .....          | .....           | .....           |
| PF10_0348_Kilifi_349         | .....     | .....     | .....        | .....        | .....         | .....          | .....           | .....           |
| PF10_0348_Kilifi_359         | .....     | .....A.   | .....        | .....C.      | .....         | .....          | .....           | .....           |
| PF10_0348_Kilifi_364         | .....     | .....A.   | .....        | .....C.      | .....         | .....          | .....           | .....           |
| PF10_0348_Kilifi_389         | .....     | .....A.   | .....        | .....        | .....         | .....          | .....           | .....           |
| PF10_0348_Kilifi_406         | .....     | .....     | .....        | .....        | .....         | .....          | .....           | .....           |
| PF10_0348_Kilifi_528         | .....     | .....A.   | .....        | .....C.      | .....         | .....          | .....           | .....           |
| PF10_0348_Kilifi_388         | .....     | .....A.   | .....        | .....C.      | .....         | .....          | .....           | .....           |
| PF10_0348_Kilifi_365         | .....     | .....     | .....        | .....        | .....         | .....          | .....           | .....           |
| PF10_0348_Kilifi_323         | .....     | .....A.   | .....        | .....C.      | .....         | .....          | .....           | .....           |
| PF10_0348_Kilifi_028         | .....A    | .....A.C  | .....A.G...T | .....T...T.A | .....TA..C.A. | .....TT.C.GA.T | .....A...A.AACT | .....G..GG.AAAT |
| PF10_0348_Kilifi_110         | .....A    | .....A.C  | .....A.G...T | .....T...T.A | .....A..AAA   | .....TT.C.AA.T | .....A...A.AACT | .....G..GG.AAAT |
| PF10_0348_Kilifi_128         | .....A    | .....A.C  | .....A.G...T | .....T...T.A | .....TA..CAA  | .....TT.C.GA.T | .....A...A.AACT | .....G..GG.AAAT |
| PF10_0348_Kilifi_214         | .....A    | .....A.C  | .....A.G...T | .....T...T.A | .....TA..CAA  | .....TT.C.GA.T | .....A...A.AACT | .....G..GG.AAAT |
| PF10_0348_Kilifi_216         | .....A    | .....A.C  | .....A.G...T | .....T...T.A | .....TA..CAA  | .....TT.C.GA.T | .....A...A.AACT | .....G..GG.AAAT |
| PF10_0348_Kilifi_314         | .....A    | .....A.C  | .....A.G...T | .....T...T.A | .....A..AAA   | .....TT.C.AA.T | .....A...A.AACT | .....G..GG.AAAT |
| PF10_0348_Kilifi_384         | .....A    | .....A.C  | .....A.G...T | .....T...T.A | .....A..AAA   | .....TT.C.AA.T | .....A...A.AACT | .....G..GG.AAAT |
| PF10_0348_Kilifi_298         | .....A    | .....A.C  | .....A.G...T | .....T...T.A | .....TA..CAA  | .....TT.C.GA.T | .....A...A.AACT | .....G..GG.AAAT |
| PF10_0348_Kilifi_020         | .....A    | .....A.C  | .....A.G...T | .....T...T.A | .....TA..CAA  | .....TT.C.GA.T | .....A...A.AACT | .....G..GG.AAAT |
| PF10_0348_Kilifi_052         | .....A    | .....A.C  | .....A.G...T | .....T...T.A | .....TA..CAA  | .....TT.C.GA.T | .....A...A.AACT | .....G..GG.AAAT |
| PF10_0348_Kilifi_164         | .....A    | .....A.C  | .....A.G...T | .....T...T.A | .....TA..CAA  | .....TT.C.GA.T | .....A...A.AACT | .....G..GG.AAAT |
| PF10_0348_Kilifi_194         | .....A    | .....A.C  | .....A.G...T | .....T...T.A | .....TA..CAA  | .....TT.C.GA.T | .....A...A.AACT | .....G..GG.AAAT |
| PF10_0348_Kilifi_302         | .....A    | .....A.C  | .....A.G...T | .....T...T.A | .....TA..CAA  | .....TT.C.GA.T | .....A...A.AACT | .....G..GG.AAAT |
| PF10_0348_Kilifi_304         | .....A    | .....A.C  | .....A.G...T | .....T...T.A | .....TA..CAA  | .....TT.C.GA.T | .....A...A.AACT | .....G..GG.AAAT |
| PF10_0348_Kilifi_311         | .....A    | .....A.C  | .....A.G...T | .....T...T.A | .....TA..CAA  | .....TT.C.GA.T | .....A...A.AACT | .....G..GG.AAAT |
| PF10_0348_Kilifi_321         | .....A    | .....A.C  | .....A.G...T | .....T...T.A | .....TA..CAA  | .....TT.C.GA.T | .....A...A.AACT | .....G..GG.AAAT |
| PF10_0348_Kilifi_044         | .....A    | .....A.C  | .....A.G...T | .....T...T.A | .....TA..CAA  | .....TT.C.GA.T | .....A...A.AACT | .....G..GG.AAAT |
| PF10_0348_Kilifi_356         | .....A    | .....A.C  | .....A.G...T | .....T...T.A | .....TA..CAA  | .....TT.C.GA.T | .....A...A.AACT | .....G..GG.AAAT |
| PF10_0348_Kilifi_045         | .....A    | .....A.C  | .....A.G...T | .....T...T.A | .....TA..CAA  | .....TT.C.GA.T | .....A...A.AACT | .....G..GG.AAAT |
| <i>Plasmodium reichenowi</i> | .....A    | .....G..  | .....        | .....        | .....C.C.TA.. | .....T.....    | .....T..C.....  | .....           |







|                              | 810        | 820         | 830         | 840        | 850        | 860        | 870        | 880        |
|------------------------------|------------|-------------|-------------|------------|------------|------------|------------|------------|
| PF10_0348_3D7                | .... ....  | .... ....   | .... ....   | .... ....  | .... ....  | .... ....  | .... ....  | .... ....  |
| PF10_0348_Kilifi_019         | AAATATAAAT | AGGGCATTAG  | ATAAAAATATT | ACGTAATGAA | ACAAGTAAT- | --GACAAAAT | TAAAAAACGT | GTAGACTGGT |
| PF10_0348_Kilifi_021         | .....      | .....       | .....       | .G.....    | .....      | --.....    | .....      | .....      |
| PF10_0348_Kilifi_023         | .....      | .....       | .....       | .G.....    | .....      | --.....    | .....      | .....      |
| PF10_0348_Kilifi_027         | .....      | .....       | .....       | .G.....    | .....      | --.....    | .....      | .....      |
| PF10_0348_Kilifi_050         | .....      | .....       | .....       | .G.....    | .....      | --.....    | .....      | .....      |
| PF10_0348_Kilifi_057         | .....      | .....       | .....       | .G.....    | .....      | --.....    | .....      | .....      |
| PF10_0348_Kilifi_062         | .....      | .....       | .....       | .G.....    | .....      | --.....    | .....      | .....      |
| PF10_0348_Kilifi_082         | .....      | .....       | .....       | .G.....    | .....      | --.....    | .....      | .....      |
| PF10_0348_Kilifi_091         | .....      | .....       | .....       | .G.....    | .....      | --.....    | .....      | .....      |
| PF10_0348_Kilifi_093         | .....      | .....       | .....       | .G.....    | .....      | --.....    | .....      | .....      |
| PF10_0348_Kilifi_097         | .....      | .....       | .....       | .G.....    | .....      | --.....    | .....      | .....      |
| PF10_0348_Kilifi_105         | .....      | .....       | .....       | .G.....    | .....      | --.....    | .....      | .....      |
| PF10_0348_Kilifi_160         | .....      | .....       | .....       | .G.....    | .....      | --.....    | .....      | .....      |
| PF10_0348_Kilifi_162         | .....      | .....       | .....       | .G.....    | .....      | --.....    | .....      | .....      |
| PF10_0348_Kilifi_186         | .....      | .....       | .....       | .G.....    | .....      | --.....    | .....      | .....      |
| PF10_0348_Kilifi_191         | .....      | .....       | .....       | .G.....    | .....      | --.....    | .....      | .....      |
| PF10_0348_Kilifi_199         | .....      | .....       | .....       | .G.....    | .....      | --.....    | .....      | .....      |
| PF10_0348_Kilifi_235         | .....      | .....       | .....       | .G.....    | .....      | --.....    | .....      | .....      |
| PF10_0348_Kilifi_242         | .....      | .....       | .....       | .G.....    | .....      | --.....    | .....      | .....      |
| PF10_0348_Kilifi_245         | .....      | .....       | .....       | .G.....    | .....      | --.....    | .....      | .....      |
| PF10_0348_Kilifi_248         | .....      | .....       | .....       | .G.....    | .....      | --.....    | .....      | .....      |
| PF10_0348_Kilifi_249         | .....      | .....       | .....       | .G.....    | .....      | --.....    | .....      | .....      |
| PF10_0348_Kilifi_262         | .....      | .....       | .....       | .G.....    | .....      | --.....    | .....      | .....      |
| PF10_0348_Kilifi_289         | .....      | .....       | .....       | .G.....    | .....      | --.....    | .....      | .....      |
| PF10_0348_Kilifi_290         | .....      | .....       | .....       | .G.....    | .....      | --.....    | .....      | .....      |
| PF10_0348_Kilifi_297         | .....      | .....       | .....       | .G.....    | .....      | --.....    | .....      | .....      |
| PF10_0348_Kilifi_299         | .....      | .....       | .....       | .G.....    | .....      | --.....    | .....      | .....      |
| PF10_0348_Kilifi_310         | .....      | .....       | .....       | .G.....    | .....      | --.....    | .....      | .....      |
| PF10_0348_Kilifi_319         | .....      | .....       | .....       | .G.....    | .....      | --.....    | .....      | .....      |
| PF10_0348_Kilifi_324         | .....      | .....       | .....       | .G.....    | .....      | --.....    | .....      | .....      |
| PF10_0348_Kilifi_333         | .....      | .....       | .....       | .G.....    | .....      | --.....    | .....      | .....      |
| PF10_0348_Kilifi_334         | .....      | .....       | .....       | .G.....    | .....      | --.....    | .....      | .....      |
| PF10_0348_Kilifi_336         | .....      | .....       | .....       | .G.....    | .....      | --.....    | .....      | .....      |
| PF10_0348_Kilifi_344         | .....      | .....       | .....       | .G.....    | .....      | --.....    | .....      | .....      |
| PF10_0348_Kilifi_345         | .....      | .....       | .....       | .G.....    | .....      | --.....    | .....      | .....      |
| PF10_0348_Kilifi_349         | .....      | .....       | .....       | .G.....    | .....      | --.....    | .....      | .....      |
| PF10_0348_Kilifi_359         | .....      | .....       | .....       | .G.....    | .....      | --.....    | .....      | .....      |
| PF10_0348_Kilifi_364         | .....      | .....       | .....       | .G.....    | .....      | --.....    | .....      | .....      |
| PF10_0348_Kilifi_389         | .....      | .....       | .....       | .G.....    | .....      | --.....    | .....      | .....      |
| PF10_0348_Kilifi_406         | .....      | .....       | .....       | .G.....    | .....      | --.....    | .....      | .....      |
| PF10_0348_Kilifi_528         | .....      | .....       | .....       | .G.....    | .....      | --.....    | .....      | .....      |
| PF10_0348_Kilifi_388         | .....      | .....       | .....       | .G.....    | .....      | --.....    | .....      | .....      |
| PF10_0348_Kilifi_365         | .....      | .....       | .....       | .G.....    | .....      | --.....    | .....      | .....      |
| PF10_0348_Kilifi_323         | .....      | .....       | .....       | .G.....    | .....      | --.....    | .....      | .....      |
| PF10_0348_Kilifi_028         | TG.A.CC.TA | .CATAT....  | .AG..G..C.  | TAAA.T.C.T | .AT.AA...A | AT..T...CC | A...G.TGCA | AA.A.A.... |
| PF10_0348_Kilifi_110         | .G.A.CC.TA | .CATAT....  | .A...G..C.  | TAAA.T.T.T | .ATGAA...A | AT..T...CC | A...G.TGCA | AA.A.A.... |
| PF10_0348_Kilifi_128         | .G.A.CC.TA | .CATAT....  | .A...G..C.  | TAAA.T.T.T | .ATGAA...A | AT..T...CC | A...G.TGCA | AA.A.A.... |
| PF10_0348_Kilifi_214         | .G.A.CC.TA | .CATAT....  | .A...G..C.  | TAAA.T.T.T | .ATGAA...A | AT..T...CC | A...G.TGCA | AA.A.A.... |
| PF10_0348_Kilifi_216         | .G.A.CC.TA | .CATAT....  | .A...G..C.  | TAAA.T.T.T | .ATGAA...A | AT..T...CC | A...G.TGCA | AA.A.A.... |
| PF10_0348_Kilifi_314         | .G.A.CC.TA | .CATAT....  | .A...G..C.  | TAAA.T.T.T | .ATGAA...A | AT..T...CC | A...G.TGCA | AA.A.A.... |
| PF10_0348_Kilifi_384         | .G.A.CC.TA | .CATAT....  | .A...G..C.  | TAAA.T.T.T | .ATGAA...A | AT..T...CC | A...G.TGCA | AA.A.A.... |
| PF10_0348_Kilifi_298         | .G.A.CC.TA | .CATAT....  | .A...G..C.  | TAAA.T.T.T | .ATGAA...A | AT..T...CC | A...G.TGCA | AA.A.A.... |
| PF10_0348_Kilifi_020         | T..A.C...A | .CATAT..G.  | .AG..G..C.  | CG.A.AC..  | TAT.AA...G | TTA.TG.TCC | A...G.TGC  | AA.AC....  |
| PF10_0348_Kilifi_052         | T..A.C...A | .CATAT..CG. | .AG..G..C.  | CG.A.AC..  | TAT.CA...G | TTA.TG.TCC | A...G.TGC  | AA..C....  |
| PF10_0348_Kilifi_164         | T..A.C...A | .CATAT..G.  | .AG..G..C.  | CG.A.AC..  | TAT.AA...G | TTA.TG.TCC | A...G.TGC  | AA.AC....  |
| PF10_0348_Kilifi_194         | T..A.C...A | .CATAT..G.  | .AG..G..C.  | CG.A.AC..  | TAT.AA...G | TTA.TG.TCC | A...G.TGC  | AA.AC....  |
| PF10_0348_Kilifi_302         | T..A.C...A | .CATAT..G.  | .AG..G..C.  | CG.A.AC..  | TAT.AA...G | TTA.TG.TCC | A...G.TGC  | AA.AC....  |
| PF10_0348_Kilifi_304         | T..A.C...A | .CATAT..G.  | .AG..G..C.  | CG.A.AC..  | TAT.AA...G | TTA.TG.TCC | A...G.TGC  | AA.AC....  |
| PF10_0348_Kilifi_311         | T..A.C...A | .CATAT..G.  | .AG..G..C.  | CG.A.AC..  | TAT.AA...G | TTA.TG.TCC | A...G.TGC  | AA.AC....  |
| PF10_0348_Kilifi_321         | T..A.C...A | .CATAT..G.  | .AG..G..C.  | CG.A.AC..  | TAT.AA...G | TTA.TG.TCC | A...G.TGC  | AA.AC....  |
| PF10_0348_Kilifi_044         | T..A.C...A | .CATAT..G.  | .AG..G..C.  | CG.A.AC..  | TAT.AA...G | TTA.TG.TCC | A...G.TGC  | AA.AC....  |
| PF10_0348_Kilifi_356         | T..A.C...A | .CATAT..G.  | .AG..G..C.  | CG.A.AC..  | TAT.AA...G | TTA.TG.TCC | A...G.TGC  | AA.AC....  |
| PF10_0348_Kilifi_045         | T..A.C...A | .CATAT..G.  | .AG..G..C.  | CG.A.AC..  | TAT.AA...G | TTA.TG.TCC | A...G.TGC  | AA.AC....  |
| <i>Plasmodium reichenowi</i> | .....      | .....       | .....       | .G.....    | .GG.....   | --.C.G.... | A....T.... | .....      |

|                              | 890        | 900        | 910        | 920        | 930        | 940         | 950         | 960        |
|------------------------------|------------|------------|------------|------------|------------|-------------|-------------|------------|
| PF10_0348_3D7                | GGGAAGCTAA | TAAAAGTGCA | TCTTGGGATG | CATTCATGTG | TGGATATAAA | GTTTCATATCG | GAAATAAACCC | ATGTCCAGAA |
| PF10_0348_Kilifi_019         |            |            |            |            |            |             | T           |            |
| PF10_0348_Kilifi_021         |            |            |            |            |            |             |             |            |
| PF10_0348_Kilifi_023         |            |            |            |            |            |             |             |            |
| PF10_0348_Kilifi_027         |            |            |            |            |            |             |             |            |
| PF10_0348_Kilifi_050         |            |            |            |            |            |             |             |            |
| PF10_0348_Kilifi_057         |            |            |            |            |            |             | T           |            |
| PF10_0348_Kilifi_062         |            |            |            |            |            |             |             |            |
| PF10_0348_Kilifi_082         |            |            |            |            |            |             |             |            |
| PF10_0348_Kilifi_091         |            |            |            |            |            |             |             |            |
| PF10_0348_Kilifi_093         |            |            |            |            |            |             |             |            |
| PF10_0348_Kilifi_097         |            |            |            |            |            |             | T           |            |
| PF10_0348_Kilifi_105         |            |            |            |            |            |             |             |            |
| PF10_0348_Kilifi_160         |            |            |            |            |            |             |             |            |
| PF10_0348_Kilifi_162         |            |            |            |            |            |             |             |            |
| PF10_0348_Kilifi_186         |            |            |            |            |            |             | T           |            |
| PF10_0348_Kilifi_191         |            |            |            |            |            |             |             |            |
| PF10_0348_Kilifi_199         |            |            |            |            |            |             |             |            |
| PF10_0348_Kilifi_235         |            |            |            |            |            |             |             |            |
| PF10_0348_Kilifi_242         |            |            |            |            |            |             |             |            |
| PF10_0348_Kilifi_245         |            |            |            |            |            |             |             |            |
| PF10_0348_Kilifi_248         |            |            |            |            |            |             |             |            |
| PF10_0348_Kilifi_249         |            |            |            |            |            |             |             |            |
| PF10_0348_Kilifi_262         |            |            |            |            |            |             |             |            |
| PF10_0348_Kilifi_289         |            |            |            |            |            |             |             |            |
| PF10_0348_Kilifi_290         |            |            |            |            |            |             |             |            |
| PF10_0348_Kilifi_297         |            |            |            |            |            |             |             |            |
| PF10_0348_Kilifi_299         |            |            |            |            |            |             | T           |            |
| PF10_0348_Kilifi_310         |            |            |            |            |            |             | T           |            |
| PF10_0348_Kilifi_319         |            |            |            |            |            |             |             |            |
| PF10_0348_Kilifi_324         |            |            |            |            |            |             |             |            |
| PF10_0348_Kilifi_333         |            |            |            |            |            |             |             |            |
| PF10_0348_Kilifi_334         |            |            |            |            |            |             |             |            |
| PF10_0348_Kilifi_336         |            |            |            |            |            |             | T           |            |
| PF10_0348_Kilifi_344         |            |            |            |            |            |             |             |            |
| PF10_0348_Kilifi_345         |            |            |            |            |            |             |             |            |
| PF10_0348_Kilifi_349         |            |            |            |            |            |             | T           |            |
| PF10_0348_Kilifi_359         |            |            |            |            |            |             |             |            |
| PF10_0348_Kilifi_364         |            |            |            |            |            |             |             |            |
| PF10_0348_Kilifi_389         |            |            |            |            |            |             |             |            |
| PF10_0348_Kilifi_406         |            |            |            |            |            |             | T           |            |
| PF10_0348_Kilifi_528         |            |            |            |            |            |             |             |            |
| PF10_0348_Kilifi_388         |            |            |            |            |            |             |             |            |
| PF10_0348_Kilifi_365         |            |            |            |            |            |             |             |            |
| PF10_0348_Kilifi_323         |            |            |            |            |            |             |             |            |
| PF10_0348_Kilifi_028         | ..AC..AA.. | C...CA.CAT | G.T....A.  | ..A.G....  | C.....C.G  | AG.G.GC.GA  | A.G....C..  | .....G.    |
| PF10_0348_Kilifi_110         | ..AC..AA.. | C.GGCA.CAT | G.T....A.  | ..A.G....  | C.....C.G  | AG.GCGCAGA  | A.G....C.A  | ...A...GT  |
| PF10_0348_Kilifi_128         | ..AC..AA.. | C.GGCA.CAT | G.T....A.  | ..A.G....  | C.....C.G  | AG.GCGCAGA  | A.G....C.A  | ...A...GT  |
| PF10_0348_Kilifi_214         | ..AC..AA.. | C.GGCA.CAT | G.T....A.  | ..A.G....  | C.....C.G  | AG.GCGCAGA  | A.G....C.A  | ...A...GT  |
| PF10_0348_Kilifi_216         | ..AC..AA.. | C.GGCA.CAT | G.T....A.  | ..A.G....  | C.....C.G  | AG.GCGCAGA  | A.G....C.A  | ...A...GT  |
| PF10_0348_Kilifi_314         | ..AC..AA.. | C.GGCA.CAT | G.T....A.  | ..A.G....  | C.....C.G  | AG.GCGCAGA  | A.G....C.A  | ...A...GT  |
| PF10_0348_Kilifi_384         | ..AC..AA.. | C.GGCA.CAT | G.T....A.  | ..A.G....  | C.....C.G  | AG.GCGCAGA  | A.G....C.A  | ...A...GT  |
| PF10_0348_Kilifi_298         | ..AC..AA.. | C.GGCA.CAT | G.T....A.  | ..A.G....  | C.....C.G  | AG.GCGCAGA  | A.G....C.A  | ...A...GT  |
| PF10_0348_Kilifi_020         | ..ATTCAA.. | C...CA.CGT | G.T.....   | ..A.G....  |            |             |             |            |
| PF10_0348_Kilifi_052         | ..ATTCAA.. | C...CA.C.T | G.T.....   | ..A.G....  |            |             |             |            |
| PF10_0348_Kilifi_164         | ..ATTCAA.. | C...CA.CGT | G.T.....   | ..A.G....  |            |             |             |            |
| PF10_0348_Kilifi_194         | ..ATTCAA.. | C...CA.CGT | G.T.....   | ..A.G....  |            |             |             |            |
| PF10_0348_Kilifi_302         | ..ATTCAA.. | C...CA.CGT | G.T.....   | ..A.G....  |            |             |             |            |
| PF10_0348_Kilifi_304         | ..ATTCAA.. | C...CA.CGT | G.T.....   | ..A.G....  |            |             |             |            |
| PF10_0348_Kilifi_311         | ..ATTCAA.. | C...CA.CGT | G.T.....   | ..A.G....  |            |             |             |            |
| PF10_0348_Kilifi_321         | ..ATTCAA.. | C...CA.CGT | G.T.....   | ..A.G....  |            |             |             |            |
| PF10_0348_Kilifi_044         | ..ATTCAA.. | C...CA.CGT | G.T.....   | ..A.G....  |            |             |             |            |
| PF10_0348_Kilifi_356         | ..ATTCAA.. | C...CA.CGT | G.T.....   | ..A.G....  |            |             |             |            |
| PF10_0348_Kilifi_045         | ..ATTCAA.. | C...CA.CGT | G.T.....   | ..A.G....  |            |             |             |            |
| <i>Plasmodium reichenowi</i> |            | ..A..A.    | ..A..A.    | ..A..A.    | A.....A.   | ..A..G.     |             |            |





|                              | 1130       | 1140       | 1150      | 1160       | 1170       | 1180       | 1190       | 1200       |
|------------------------------|------------|------------|-----------|------------|------------|------------|------------|------------|
| PF10_0348_3D7                | .... ....  | .... ....  | .... .... | .... ....  | .... ....  | .... ....  | .... ....  | .... ....  |
| PF10_0348_Kilifi_019         | AAAAGGATAA | ATGTAAAGAA | GCATTAAGC | ATTATGAAGA | ATGGGTTAAT | AGAAGGAGAC | CTGAATGGAA | AGGCCAATGT |
| PF10_0348_Kilifi_021         | ..G.....   | .....GT    |           |            |            |            |            | ..T.....   |
| PF10_0348_Kilifi_023         | .....      | .....GT    |           |            |            |            |            | ..T.....   |
| PF10_0348_Kilifi_027         | .....      | .....GT    |           |            |            |            |            | ..T.....   |
| PF10_0348_Kilifi_050         | ..G.....   | .....GT    |           |            |            |            |            | ..T.....   |
| PF10_0348_Kilifi_057         | .....      | .....GT    |           |            |            |            |            | ..T.....   |
| PF10_0348_Kilifi_062         | .....      | .....GT    |           |            |            |            |            | ..T.....   |
| PF10_0348_Kilifi_082         | .....      | .....GT    |           |            |            |            |            | ..T.....   |
| PF10_0348_Kilifi_091         | ..G.....   | .....GT    |           |            |            |            |            | ..T.....   |
| PF10_0348_Kilifi_093         | ..G.....   | .....GT    |           |            |            |            |            | ..T.....   |
| PF10_0348_Kilifi_097         | ..G.....   | .....GT    |           |            |            |            |            | ..T.....   |
| PF10_0348_Kilifi_105         | .....      | .....GT    |           |            |            |            |            | ..T.....   |
| PF10_0348_Kilifi_160         | .....      | .....GT    |           |            |            |            |            | ..T.....   |
| PF10_0348_Kilifi_162         | ..G.....   | .....GT    |           |            |            |            |            | ..T.....   |
| PF10_0348_Kilifi_186         | .....      | .....GT    |           |            |            |            |            | ..T.....   |
| PF10_0348_Kilifi_191         | .....      | .....GT    |           |            |            |            |            | ..T.....   |
| PF10_0348_Kilifi_199         | .....      | .....GT    |           |            |            |            |            | ..T.....   |
| PF10_0348_Kilifi_235         | .....      | .....GT    |           |            |            |            |            | ..T.....   |
| PF10_0348_Kilifi_242         | ..G.....   | .....GT    |           |            |            |            |            | ..T.....   |
| PF10_0348_Kilifi_245         | .....      | .....GT    |           |            |            |            |            | ..T.....   |
| PF10_0348_Kilifi_248         | .....      | .....GT    |           |            |            |            |            | ..T.....   |
| PF10_0348_Kilifi_249         | .....      | .....GT    |           |            |            |            |            | ..T.....   |
| PF10_0348_Kilifi_262         | .....      | .....GT    |           |            |            |            |            | ..T.....   |
| PF10_0348_Kilifi_289         | .....      | .....GT    |           |            |            |            |            | ..T.....   |
| PF10_0348_Kilifi_290         | .....      | ..G.....   |           |            |            |            |            | ..T.....   |
| PF10_0348_Kilifi_297         | ..G.....   | .....GT    |           |            |            |            |            | ..T.....   |
| PF10_0348_Kilifi_299         | .....      | .....GT    |           |            |            |            |            | ..T.....   |
| PF10_0348_Kilifi_310         | .....      | .....GT    |           |            |            |            |            | ..T.....   |
| PF10_0348_Kilifi_319         | .....      | .....GT    |           |            |            |            |            | ..T.....   |
| PF10_0348_Kilifi_324         | .....      | .....GT    |           |            |            |            |            | ..T.....   |
| PF10_0348_Kilifi_333         | .....      | .....GT    |           |            |            |            |            | ..T.....   |
| PF10_0348_Kilifi_334         | ..G.....   | .....GT    |           |            |            |            |            | ..T.....   |
| PF10_0348_Kilifi_336         | .....      | .....GT    |           |            |            |            |            | ..T.....   |
| PF10_0348_Kilifi_344         | .....      | .....GT    |           |            |            |            |            | ..T.....   |
| PF10_0348_Kilifi_345         | .....      | .....GT    |           |            |            |            |            | ..T.....   |
| PF10_0348_Kilifi_349         | .....      | .....GT    |           |            |            |            |            | ..T.....   |
| PF10_0348_Kilifi_359         | ..G.....   | .....GT    |           |            |            |            |            | ..T.....   |
| PF10_0348_Kilifi_364         | ..G.....   | .....GT    |           |            |            |            |            | ..T.....   |
| PF10_0348_Kilifi_389         | .....      | .....GT    |           |            |            |            |            | ..T.....   |
| PF10_0348_Kilifi_406         | .....      | .....GT    |           |            |            |            |            | ..T.....   |
| PF10_0348_Kilifi_528         | T.....     | .....T     |           |            |            |            |            | ..T.....   |
| PF10_0348_Kilifi_388         | .....      | .....GT    |           |            |            |            |            | ..T.....   |
| PF10_0348_Kilifi_365         | .....      | .....GT    |           |            |            |            |            | ..T.....   |
| PF10_0348_Kilifi_323         | .....      | .....GT    |           |            |            |            |            | ..T.....   |
| PF10_0348_Kilifi_028         | ..G.....   | .....GT    |           |            |            |            |            | ..T.....   |
| PF10_0348_Kilifi_110         | .....      | .....GT    |           |            |            |            |            | ..T.....   |
| PF10_0348_Kilifi_128         | .....      | .....GT    |           |            |            |            |            | ..T.....   |
| PF10_0348_Kilifi_214         | .....      | .....GT    |           |            |            |            |            | ..T.....   |
| PF10_0348_Kilifi_216         | ..G.....   | .....GT    |           |            |            |            |            | ..T.....   |
| PF10_0348_Kilifi_314         | .....      | .....GT    |           |            |            |            |            | ..T.....   |
| PF10_0348_Kilifi_384         | .....      | .....GT    |           |            |            |            |            | ..T.....   |
| PF10_0348_Kilifi_298         | ..G.....   | .....GT    |           |            |            |            |            | ..T.....   |
| PF10_0348_Kilifi_020         | ..G.....   | .....GT    |           |            |            |            |            | ..T.....   |
| PF10_0348_Kilifi_052         | ..G.....   | .....GT    |           |            |            |            |            | ..T.....   |
| PF10_0348_Kilifi_164         | .....      | .....GT    |           |            |            |            |            | ..T.....   |
| PF10_0348_Kilifi_194         | .....      | .....GT    |           |            |            |            |            | ..T.....   |
| PF10_0348_Kilifi_302         | .....      | .....GT    |           |            |            |            |            | ..T.....   |
| PF10_0348_Kilifi_304         | .....      | .....GT    |           |            |            |            |            | ..T.....   |
| PF10_0348_Kilifi_311         | ..G.....   | .....GT    |           |            |            |            |            | ..T.....   |
| PF10_0348_Kilifi_321         | .....      | .....GT    |           |            |            |            |            | ..T.....   |
| PF10_0348_Kilifi_044         | ..G.....   | .....GT    |           |            |            |            |            | ..T.....   |
| PF10_0348_Kilifi_356         | ..G.....   | .....GT    |           |            |            |            |            | ..T.....   |
| PF10_0348_Kilifi_045         | ..G.....   | .....GT    |           |            |            |            |            | ..T.....   |
| <i>Plasmodium reichenowi</i> | .TG.T....  | .....T     |           |            | A.....     |            |            | ..T.....   |

|                              | 1210                                                  | 1220                                                  | 1230                                                  | 1240                                                  | 1250                                                  | 1260                                                  | 1270                                                  | 1280                                                  |
|------------------------------|-------------------------------------------------------|-------------------------------------------------------|-------------------------------------------------------|-------------------------------------------------------|-------------------------------------------------------|-------------------------------------------------------|-------------------------------------------------------|-------------------------------------------------------|
| PF10_0348_3D7                | ..... ..... ..... ..... ..... ..... ..... ..... ..... | ..... ..... ..... ..... ..... ..... ..... ..... ..... | ..... ..... ..... ..... ..... ..... ..... ..... ..... | ..... ..... ..... ..... ..... ..... ..... ..... ..... | ..... ..... ..... ..... ..... ..... ..... ..... ..... | ..... ..... ..... ..... ..... ..... ..... ..... ..... | ..... ..... ..... ..... ..... ..... ..... ..... ..... | ..... ..... ..... ..... ..... ..... ..... ..... ..... |
| PF10_0348_Kilifi_019         | GATAAATTTG                                            | AAAAAGAAAA                                            | AAGTAAATAT                                            | GAAGATACTA                                            | AAAGTATAAC                                            | TGCTGAAAAA                                            | TATTTAAAAG                                            | AAATATG TTC                                           |
| PF10_0348_Kilifi_021         | .....                                                 | .....                                                 | .....                                                 | .....                                                 | .....G.....                                           | .....T.....                                           | .....                                                 | .....                                                 |
| PF10_0348_Kilifi_023         | .....                                                 | .....                                                 | .....                                                 | .....                                                 | .....G.....                                           | .....T.....                                           | .....                                                 | .....                                                 |
| PF10_0348_Kilifi_027         | .....                                                 | .....                                                 | .....                                                 | .....                                                 | .....G.....                                           | .....T.....                                           | .....                                                 | .....                                                 |
| PF10_0348_Kilifi_050         | .....                                                 | .....                                                 | .....                                                 | .....                                                 | .....G.....                                           | .....T.....                                           | .....                                                 | .....                                                 |
| PF10_0348_Kilifi_057         | .....                                                 | .....                                                 | .....                                                 | .....                                                 | .....G.....                                           | .....T.....                                           | .....                                                 | .....                                                 |
| PF10_0348_Kilifi_062         | .....                                                 | .....                                                 | .....                                                 | .....                                                 | .....G.....                                           | .....T.....                                           | .....                                                 | .....                                                 |
| PF10_0348_Kilifi_082         | .....                                                 | .....                                                 | .....                                                 | .....                                                 | .....G.....                                           | .....T.....                                           | .....                                                 | .....                                                 |
| PF10_0348_Kilifi_091         | .....                                                 | .....                                                 | .....                                                 | .....                                                 | .....G.....                                           | .....T.....                                           | .....                                                 | .....                                                 |
| PF10_0348_Kilifi_093         | .....                                                 | .....                                                 | .....                                                 | .....                                                 | .....G.....                                           | .....T.....                                           | .....                                                 | .....                                                 |
| PF10_0348_Kilifi_097         | .....                                                 | .....                                                 | .....                                                 | .....                                                 | .....G.....                                           | .....T.....                                           | .....                                                 | .....                                                 |
| PF10_0348_Kilifi_105         | .....                                                 | .....                                                 | .....                                                 | .....                                                 | .....G.....                                           | .....T.....                                           | .....                                                 | .....                                                 |
| PF10_0348_Kilifi_160         | .....                                                 | .....                                                 | .....                                                 | .....                                                 | .....G.....                                           | .....T.....                                           | .....                                                 | .....                                                 |
| PF10_0348_Kilifi_162         | .....                                                 | .....                                                 | .....                                                 | .....                                                 | .....G.....                                           | .....T.....                                           | .....                                                 | .....                                                 |
| PF10_0348_Kilifi_186         | .....                                                 | .....                                                 | .....                                                 | .....                                                 | .....G.....                                           | .....T.....                                           | .....                                                 | .....                                                 |
| PF10_0348_Kilifi_191         | .....                                                 | .....                                                 | .....                                                 | .....                                                 | .....G.....                                           | .....T.....                                           | .....                                                 | .....                                                 |
| PF10_0348_Kilifi_199         | .....                                                 | .....                                                 | .....                                                 | .....                                                 | .....G.....                                           | .....T.....                                           | .....                                                 | .....                                                 |
| PF10_0348_Kilifi_235         | .....                                                 | .....                                                 | .....                                                 | .....                                                 | .....G.....                                           | .....T.....                                           | .....                                                 | .....                                                 |
| PF10_0348_Kilifi_242         | .....                                                 | .....                                                 | .....                                                 | .....                                                 | .....G.....                                           | .....T.....                                           | .....                                                 | .....                                                 |
| PF10_0348_Kilifi_245         | .....                                                 | .....                                                 | .....                                                 | .....                                                 | .....G.....                                           | .....T.....                                           | .....                                                 | .....                                                 |
| PF10_0348_Kilifi_248         | .....                                                 | .....                                                 | .....                                                 | .....                                                 | .....G.....                                           | .....T.....                                           | .....                                                 | .....                                                 |
| PF10_0348_Kilifi_249         | .....                                                 | .....                                                 | .....                                                 | .....                                                 | .....G.....                                           | .....T.....                                           | .....                                                 | .....                                                 |
| PF10_0348_Kilifi_262         | .....                                                 | .....                                                 | .....                                                 | .....                                                 | .....G.....                                           | .....T.....                                           | .....                                                 | .....                                                 |
| PF10_0348_Kilifi_289         | .....                                                 | .....                                                 | .....                                                 | .....                                                 | .....G.....                                           | .....T.....                                           | .....                                                 | .....                                                 |
| PF10_0348_Kilifi_290         | .....                                                 | .....                                                 | .....                                                 | .....                                                 | .....G.....                                           | .....T.....                                           | .....                                                 | .....                                                 |
| PF10_0348_Kilifi_297         | .....                                                 | .....                                                 | .....                                                 | .....                                                 | .....G.....                                           | .....T.....                                           | .....                                                 | .....                                                 |
| PF10_0348_Kilifi_299         | .....                                                 | .....                                                 | .....                                                 | .....                                                 | .....G.....                                           | .....T.....                                           | .....                                                 | .....                                                 |
| PF10_0348_Kilifi_310         | .....                                                 | .....                                                 | .....                                                 | .....                                                 | .....G.....                                           | .....T.....                                           | .....                                                 | .....                                                 |
| PF10_0348_Kilifi_319         | .....                                                 | .....                                                 | .....                                                 | .....                                                 | .....G.....                                           | .....T.....                                           | .....                                                 | .....                                                 |
| PF10_0348_Kilifi_324         | .....                                                 | .....                                                 | .....                                                 | .....                                                 | .....G.....                                           | .....T.....                                           | .....                                                 | .....                                                 |
| PF10_0348_Kilifi_333         | .....                                                 | .....                                                 | .....                                                 | .....                                                 | .....G.....                                           | .....T.....                                           | .....                                                 | .....                                                 |
| PF10_0348_Kilifi_334         | .....                                                 | .....                                                 | .....                                                 | .....                                                 | .....G.....                                           | .....T.....                                           | .....                                                 | .....                                                 |
| PF10_0348_Kilifi_336         | .....                                                 | .....                                                 | .....                                                 | .....                                                 | .....G.....                                           | .....T.....                                           | .....                                                 | .....                                                 |
| PF10_0348_Kilifi_344         | .....                                                 | .....                                                 | .....                                                 | .....                                                 | .....G.....                                           | .....T.....                                           | .....                                                 | .....                                                 |
| PF10_0348_Kilifi_345         | .....                                                 | .....                                                 | .....                                                 | .....                                                 | .....G.....                                           | .....T.....                                           | .....                                                 | .....                                                 |
| PF10_0348_Kilifi_349         | .....                                                 | .....                                                 | .....                                                 | .....                                                 | .....G.....                                           | .....T.....                                           | .....                                                 | .....                                                 |
| PF10_0348_Kilifi_359         | .....                                                 | .....                                                 | .....                                                 | .....                                                 | .....G.....                                           | .....T.....                                           | .....                                                 | .....                                                 |
| PF10_0348_Kilifi_364         | .....                                                 | .....                                                 | .....                                                 | .....                                                 | .....G.....                                           | .....T.....                                           | .....                                                 | .....                                                 |
| PF10_0348_Kilifi_389         | .....                                                 | .....                                                 | .....                                                 | .....                                                 | .....G.....                                           | .....T.....                                           | .....                                                 | .....                                                 |
| PF10_0348_Kilifi_406         | .....                                                 | .....                                                 | .....                                                 | .....                                                 | .....G.....                                           | .....T.....                                           | .....                                                 | .....                                                 |
| PF10_0348_Kilifi_528         | .....                                                 | .....                                                 | .....                                                 | .....                                                 | .....G.....                                           | .....T.....                                           | .....                                                 | .....                                                 |
| PF10_0348_Kilifi_388         | .....                                                 | .....                                                 | .....                                                 | .....                                                 | .....G.....                                           | .....T.....                                           | .....                                                 | .....                                                 |
| PF10_0348_Kilifi_365         | .....                                                 | .....                                                 | .....                                                 | .....                                                 | .....G.....                                           | .....T.....                                           | .....                                                 | .....                                                 |
| PF10_0348_Kilifi_323         | .....                                                 | .....                                                 | .....                                                 | .....                                                 | .....G.....                                           | .....T.....                                           | .....                                                 | .....                                                 |
| PF10_0348_Kilifi_028         | .....                                                 | .....                                                 | .....                                                 | .....                                                 | .....G.....                                           | .....T.....                                           | .....                                                 | .....                                                 |
| PF10_0348_Kilifi_110         | .....                                                 | .....                                                 | .....                                                 | .....                                                 | .....G.....                                           | .....T.....                                           | .....                                                 | .....                                                 |
| PF10_0348_Kilifi_128         | .....                                                 | .....                                                 | .....                                                 | .....                                                 | .....G.....                                           | .....T.....                                           | .....                                                 | .....                                                 |
| PF10_0348_Kilifi_214         | .....                                                 | .....                                                 | .....                                                 | .....                                                 | .....G.....                                           | .....T.....                                           | .....                                                 | .....                                                 |
| PF10_0348_Kilifi_216         | .....                                                 | .....                                                 | .....                                                 | .....                                                 | .....G.....                                           | .....T.....                                           | .....                                                 | .....                                                 |
| PF10_0348_Kilifi_314         | .....                                                 | .....                                                 | .....                                                 | .....                                                 | .....G.....                                           | .....T.....                                           | .....                                                 | .....                                                 |
| PF10_0348_Kilifi_384         | .....                                                 | .....                                                 | .....                                                 | .....                                                 | .....G.....                                           | .....T.....                                           | .....                                                 | .....                                                 |
| PF10_0348_Kilifi_298         | .....                                                 | .....                                                 | .....                                                 | .....                                                 | .....G.....                                           | .....T.....                                           | .....                                                 | .....                                                 |
| PF10_0348_Kilifi_020         | .....                                                 | .....                                                 | .....                                                 | .....                                                 | .....G.....                                           | .....T.....                                           | .....                                                 | .....                                                 |
| PF10_0348_Kilifi_052         | .....                                                 | .....                                                 | .....                                                 | .....                                                 | .....G.....                                           | .....T.....                                           | .....                                                 | .....                                                 |
| PF10_0348_Kilifi_164         | .....                                                 | .....                                                 | .....                                                 | .....                                                 | .....G.....                                           | .....T.....                                           | .....                                                 | .....                                                 |
| PF10_0348_Kilifi_194         | .....                                                 | .....                                                 | .....                                                 | .....                                                 | .....G.....                                           | .....T.....                                           | .....                                                 | .....                                                 |
| PF10_0348_Kilifi_302         | .....                                                 | .....                                                 | .....                                                 | .....                                                 | .....G.....                                           | .....T.....                                           | .....                                                 | .....                                                 |
| PF10_0348_Kilifi_304         | .....                                                 | .....                                                 | .....                                                 | .....                                                 | .....G.....                                           | .....T.....                                           | .....                                                 | .....                                                 |
| PF10_0348_Kilifi_311         | .....                                                 | .....                                                 | .....                                                 | .....                                                 | .....G.....                                           | .....T.....                                           | .....                                                 | .....                                                 |
| PF10_0348_Kilifi_321         | .....                                                 | .....                                                 | .....                                                 | .....                                                 | .....G.....                                           | .....T.....                                           | .....                                                 | .....                                                 |
| PF10_0348_Kilifi_044         | .....                                                 | .....                                                 | .....                                                 | .....                                                 | .....G.....                                           | .....T.....                                           | .....                                                 | .....                                                 |
| PF10_0348_Kilifi_356         | .....                                                 | .....                                                 | .....                                                 | .....                                                 | .....G.....                                           | .....T.....                                           | .....                                                 | .....                                                 |
| PF10_0348_Kilifi_045         | .....                                                 | .....                                                 | .....                                                 | .....                                                 | .....G.....                                           | .....T.....                                           | .....                                                 | .....                                                 |
| <i>Plasmodium reichenowi</i> | .....                                                 | .....                                                 | .....A.....                                           | .....                                                 | .....                                                 | .....                                                 | .....                                                 | .....                                                 |

|                              | 1290       | 1300       | 1310      | 1320      | 1330       | 1340       | 1350       | 1360       |
|------------------------------|------------|------------|-----------|-----------|------------|------------|------------|------------|
| PF10_0348_3D7                | .... ....  | .... ....  | .... .... | .... .... | .... ....  | .... ....  | .... ....  | .... ....  |
| PF10_0348_Kilifi_019         | TGAATGTGAT | TGTAAATATA | AAGATTGGA | TAATACATT | AAAGAATTTA | AAGATAACGT | TACACTTCTT | AAAGCAGTAA |
| PF10_0348_Kilifi_021         | .....      | .....      | .....     | .....     | .....      | .....      | ..G.....   | .....      |
| PF10_0348_Kilifi_023         | .....      | .....      | .....     | .....     | .....      | .....      | ..G.....   | .....      |
| PF10_0348_Kilifi_027         | .....      | .....      | .....     | .....     | .....      | .....      | ..G.....   | .....      |
| PF10_0348_Kilifi_050         | .....      | .....      | .....     | .....     | .....      | .T.....    | ..G.....   | .....      |
| PF10_0348_Kilifi_057         | .....      | .....      | .....     | .....     | .....      | .T.....    | ..G.....   | .....      |
| PF10_0348_Kilifi_062         | .....      | .....      | .....     | .....     | .....      | .....      | ..G.....   | .....      |
| PF10_0348_Kilifi_082         | .....      | .....      | .....     | .....     | .....      | .....      | ..G.....   | .....      |
| PF10_0348_Kilifi_091         | .....      | .....      | .....     | .....     | .....      | .....      | ..G.....   | .....      |
| PF10_0348_Kilifi_093         | .....      | .....      | .....     | .....     | .....      | .....      | ..G.....   | .....      |
| PF10_0348_Kilifi_097         | .....      | .....      | .....     | .....     | .....      | .....      | ..G.....   | .....      |
| PF10_0348_Kilifi_105         | .....      | .....      | .....     | .....     | .....      | .T.....    | ..G.....   | .....      |
| PF10_0348_Kilifi_160         | .....      | .....      | .....     | .....     | .....      | .T.....    | ..G.....   | .....      |
| PF10_0348_Kilifi_162         | .....      | .....      | .....     | .....     | .....      | .....      | ..G.....   | .....      |
| PF10_0348_Kilifi_186         | .....      | .....      | .....     | .....     | .....      | .....      | ..G.....   | .....      |
| PF10_0348_Kilifi_191         | .....      | .....      | .....     | .....     | .....      | .....      | ..G.....   | .....      |
| PF10_0348_Kilifi_199         | .....      | .....      | .....     | .....     | .....      | .....      | ..G.....   | .....      |
| PF10_0348_Kilifi_235         | .....      | .....      | .....     | .....     | .....      | .....      | ..G.....   | .....      |
| PF10_0348_Kilifi_242         | .....      | .....      | .....     | .....     | .....      | .....      | ..G.....   | .....      |
| PF10_0348_Kilifi_245         | .....      | .....      | .....     | .....     | .....      | .....      | ..G.....   | .....      |
| PF10_0348_Kilifi_248         | .....      | .....      | .....     | .....     | .....      | .T.....    | ..G.....   | .....      |
| PF10_0348_Kilifi_249         | .....      | .....      | .....     | .....     | .....      | .T.....    | ..G.....   | .....      |
| PF10_0348_Kilifi_262         | .....      | .....      | .....     | .....     | .....      | .....      | ..G.....   | .....      |
| PF10_0348_Kilifi_289         | .....      | .....      | .....     | .....     | .....      | .T.....    | ..G.....   | .....      |
| PF10_0348_Kilifi_290         | .....      | .....      | .....     | .....     | .....      | .....      | ..G.....   | .....      |
| PF10_0348_Kilifi_297         | .....      | .....      | .....     | .....     | .....      | .....      | ..G.....   | .....      |
| PF10_0348_Kilifi_299         | .....      | .....      | .....     | .....     | .....      | .....      | ..G.....   | .....      |
| PF10_0348_Kilifi_310         | .....      | .....      | .....     | .....     | .....      | .T.....    | ..G.....   | .....      |
| PF10_0348_Kilifi_319         | .....      | .....      | .....     | .....     | .....      | .....      | ..G.....   | .....      |
| PF10_0348_Kilifi_324         | .....      | .....      | .....     | .....     | .....      | .T.....    | ..G.....   | .....      |
| PF10_0348_Kilifi_333         | .....      | .....      | .....     | .....     | .....      | .T.....    | ..G.....   | .....      |
| PF10_0348_Kilifi_334         | .....      | .....      | .....     | .....     | .....      | .....      | ..G.....   | .....      |
| PF10_0348_Kilifi_336         | .....      | .....      | .....     | .....     | .....      | .....      | ..G.....   | .....      |
| PF10_0348_Kilifi_344         | .....      | .....      | .....     | .....     | .....      | .....      | ..G.....   | .....      |
| PF10_0348_Kilifi_345         | .....      | .....      | .....     | .....     | .....      | .....      | ..G.....   | .....      |
| PF10_0348_Kilifi_349         | .....      | .....      | .....     | .....     | .....      | .....      | ..G.....   | .....      |
| PF10_0348_Kilifi_359         | .....      | .....      | .....     | .....     | .....      | .....      | ..G.....   | .....      |
| PF10_0348_Kilifi_364         | .....      | .....      | .....     | .....     | .....      | .T.....    | ..G.....   | .....      |
| PF10_0348_Kilifi_389         | .....      | .....      | .....     | .....     | .....      | .....      | ..G.....   | .....      |
| PF10_0348_Kilifi_406         | .....      | .....      | .....     | .....     | .....      | .....      | ..G.....   | .....      |
| PF10_0348_Kilifi_528         | .....      | .....      | .....     | .....     | .....      | .....      | ..G.....   | .....      |
| PF10_0348_Kilifi_388         | .....      | .....      | .....     | .....     | .....      | .....      | ..G.....   | .....      |
| PF10_0348_Kilifi_365         | .....      | .....      | .....     | .....     | .....      | .....      | ..G.....   | .....      |
| PF10_0348_Kilifi_323         | .....      | .....      | .....     | .....     | .....      | .....      | ..G.....   | .....      |
| PF10_0348_Kilifi_028         | .....      | .....      | .....     | .....     | .....      | .....      | ..G.....   | .....      |
| PF10_0348_Kilifi_110         | .....      | .....      | .....     | .....     | .....      | .T.....    | ..G.....   | .....      |
| PF10_0348_Kilifi_128         | .....      | .....      | .....     | .....     | .....      | .T.....    | ..G.....   | .....      |
| PF10_0348_Kilifi_214         | .....      | .....      | .....     | .....     | .....      | .....      | ..G.....   | .....      |
| PF10_0348_Kilifi_216         | .....      | .....      | .....     | .....     | .....      | .....      | ..G.....   | .....      |
| PF10_0348_Kilifi_314         | .....      | .....      | .....     | .....     | .....      | .T.....    | ..G.....   | .....      |
| PF10_0348_Kilifi_384         | .....      | .....      | .....     | .....     | .....      | .T.....    | ..G.....   | .....      |
| PF10_0348_Kilifi_298         | .....      | .....      | .....     | .....     | .....      | .....      | ..G.....   | .....      |
| PF10_0348_Kilifi_020         | .....      | .....      | .....     | .....     | .....      | .T.....    | ..G.....   | .....      |
| PF10_0348_Kilifi_052         | .....      | .....      | .....     | .....     | .....      | .....      | ..G.....   | .....      |
| PF10_0348_Kilifi_164         | .....      | .....      | .....     | .....     | .....      | .....      | ..G.....   | .....      |
| PF10_0348_Kilifi_194         | .....      | .....      | .....     | .....     | .....      | .....      | ..G.....   | .....      |
| PF10_0348_Kilifi_302         | .....      | .....      | .....     | .....     | .....      | .T.....    | ..G.....   | .....      |
| PF10_0348_Kilifi_304         | .....      | .....      | .....     | .....     | .....      | .....      | ..G.....   | .....      |
| PF10_0348_Kilifi_311         | .....      | .....      | .....     | .....     | .....      | .T.....    | ..G.....   | .....      |
| PF10_0348_Kilifi_321         | .....      | .....      | .....     | .....     | .....      | .T.....    | ..G.....   | .....      |
| PF10_0348_Kilifi_044         | .....      | .....      | .....     | .....     | .....      | .....      | ..G.....   | .....      |
| PF10_0348_Kilifi_356         | .....      | .....      | .....     | .....     | .....      | .....      | ..G.....   | .....      |
| PF10_0348_Kilifi_045         | .....      | .....      | .....     | .....     | .....      | .....      | ..G.....   | .....      |
| <i>Plasmodium reichenowi</i> | .....      | .....      | .....     | .....     | .....      | .....      | ..G.....   | .....      |



|                              | 1370       | 1380       | 1390       | 1400        | 1410       | 1420       | 1430       | 1440       |
|------------------------------|------------|------------|------------|-------------|------------|------------|------------|------------|
| PF10_0348_3D7                | TTGATAACAA | AAAAAATCAA | GATTCTCTAA | CAACCACATTC | TTTATCAACG | TCTATTAATA | GTGTTAGGGA | TTCTAGTAAT |
| PF10_0348_Kilifi_019         |            |            |            |             |            |            |            |            |
| PF10_0348_Kilifi_021         |            |            |            |             |            |            |            |            |
| PF10_0348_Kilifi_023         |            |            |            | A           | A          |            |            |            |
| PF10_0348_Kilifi_027         |            |            |            |             |            |            |            |            |
| PF10_0348_Kilifi_050         |            |            |            |             |            |            |            |            |
| PF10_0348_Kilifi_057         |            |            |            |             |            |            |            |            |
| PF10_0348_Kilifi_062         |            |            |            |             |            |            |            |            |
| PF10_0348_Kilifi_082         |            |            |            |             |            |            |            |            |
| PF10_0348_Kilifi_091         |            |            |            |             |            |            |            |            |
| PF10_0348_Kilifi_093         |            |            |            |             |            |            |            |            |
| PF10_0348_Kilifi_097         |            |            |            |             |            |            |            |            |
| PF10_0348_Kilifi_105         |            |            |            |             |            |            |            |            |
| PF10_0348_Kilifi_160         |            |            |            |             |            |            |            |            |
| PF10_0348_Kilifi_162         |            |            |            |             |            |            |            |            |
| PF10_0348_Kilifi_186         |            |            |            |             |            |            |            |            |
| PF10_0348_Kilifi_191         |            |            |            | A           | A          |            | G          |            |
| PF10_0348_Kilifi_199         |            |            |            |             |            |            |            |            |
| PF10_0348_Kilifi_235         |            |            |            |             |            |            |            |            |
| PF10_0348_Kilifi_242         |            |            |            |             |            |            |            |            |
| PF10_0348_Kilifi_245         |            |            |            |             |            |            |            |            |
| PF10_0348_Kilifi_248         |            |            |            |             |            |            |            |            |
| PF10_0348_Kilifi_249         |            |            |            |             |            |            |            |            |
| PF10_0348_Kilifi_262         |            |            |            |             |            |            |            |            |
| PF10_0348_Kilifi_289         |            |            |            |             |            |            |            |            |
| PF10_0348_Kilifi_290         |            |            |            |             |            |            |            |            |
| PF10_0348_Kilifi_297         |            |            |            |             |            |            |            |            |
| PF10_0348_Kilifi_299         |            |            |            |             |            |            |            |            |
| PF10_0348_Kilifi_310         |            |            |            |             |            |            |            |            |
| PF10_0348_Kilifi_319         |            |            |            |             |            |            |            |            |
| PF10_0348_Kilifi_324         |            |            |            |             |            |            |            |            |
| PF10_0348_Kilifi_333         |            |            |            |             |            |            | G          |            |
| PF10_0348_Kilifi_334         |            |            |            |             |            |            |            |            |
| PF10_0348_Kilifi_336         |            |            |            |             |            |            |            |            |
| PF10_0348_Kilifi_344         |            |            |            |             |            |            |            |            |
| PF10_0348_Kilifi_345         |            |            |            |             |            |            |            |            |
| PF10_0348_Kilifi_349         |            |            |            |             |            |            |            |            |
| PF10_0348_Kilifi_359         |            |            |            |             |            |            |            |            |
| PF10_0348_Kilifi_364         |            |            |            |             |            |            |            |            |
| PF10_0348_Kilifi_389         |            |            |            |             |            |            |            |            |
| PF10_0348_Kilifi_406         |            |            |            |             |            |            |            |            |
| PF10_0348_Kilifi_528         |            |            |            |             |            |            |            |            |
| PF10_0348_Kilifi_388         |            |            |            |             |            |            |            |            |
| PF10_0348_Kilifi_365         |            |            |            |             |            |            |            |            |
| PF10_0348_Kilifi_323         |            |            |            |             |            |            |            |            |
| PF10_0348_Kilifi_028         |            |            |            |             |            |            |            |            |
| PF10_0348_Kilifi_110         |            |            |            |             |            |            | C          |            |
| PF10_0348_Kilifi_128         |            |            |            |             |            |            |            |            |
| PF10_0348_Kilifi_214         |            |            |            | A           | A          |            | G          |            |
| PF10_0348_Kilifi_216         |            |            |            |             |            |            |            |            |
| PF10_0348_Kilifi_314         |            |            |            |             |            |            |            |            |
| PF10_0348_Kilifi_384         |            |            |            |             |            |            |            |            |
| PF10_0348_Kilifi_298         |            |            |            |             |            |            |            |            |
| PF10_0348_Kilifi_020         |            |            |            | A           | A          |            |            |            |
| PF10_0348_Kilifi_052         |            |            |            |             |            |            |            |            |
| PF10_0348_Kilifi_164         |            |            |            |             |            |            |            |            |
| PF10_0348_Kilifi_194         |            |            |            |             |            |            |            |            |
| PF10_0348_Kilifi_302         |            |            |            |             |            |            |            |            |
| PF10_0348_Kilifi_304         |            |            |            |             |            |            | G          |            |
| PF10_0348_Kilifi_311         |            |            |            |             | A          |            |            |            |
| PF10_0348_Kilifi_321         |            |            |            |             |            |            |            |            |
| PF10_0348_Kilifi_044         |            |            |            |             |            |            |            |            |
| PF10_0348_Kilifi_356         |            |            |            |             |            |            |            |            |
| PF10_0348_Kilifi_045         |            |            |            |             |            |            |            |            |
| <i>Plasmodium reichenowi</i> | G          |            |            | A           | A          |            |            |            |













|                              | 1930       | 1940       | 1950       | 1960       | 1970       | 1980       | 1990       | 2000       |
|------------------------------|------------|------------|------------|------------|------------|------------|------------|------------|
| PF10_0348_3D7                | ACGGAAGATA | TAGAAGAGGA | AAATAAGGAA | AAAGAACTCA | GTAATCAACA | ACAAAGTGAA | AAAAAAAGTA | TTTCAAAAGT |
| PF10_0348_Kilifi_019         |            |            |            |            |            |            |            |            |
| PF10_0348_Kilifi_021         |            |            | .G.        |            |            |            |            |            |
| PF10_0348_Kilifi_023         |            |            |            |            |            |            |            |            |
| PF10_0348_Kilifi_027         |            |            | .G.        |            |            |            |            |            |
| PF10_0348_Kilifi_050         |            |            | .G.        |            |            |            |            |            |
| PF10_0348_Kilifi_057         |            |            |            |            |            |            |            |            |
| PF10_0348_Kilifi_062         |            |            | .G.        |            |            |            |            |            |
| PF10_0348_Kilifi_082         |            |            |            |            |            |            |            |            |
| PF10_0348_Kilifi_091         |            |            |            |            |            |            |            |            |
| PF10_0348_Kilifi_093         |            |            | .G.        |            |            |            |            |            |
| PF10_0348_Kilifi_097         |            |            |            |            |            |            |            |            |
| PF10_0348_Kilifi_105         |            |            |            |            |            |            |            |            |
| PF10_0348_Kilifi_160         |            |            |            |            |            |            |            |            |
| PF10_0348_Kilifi_162         |            |            |            |            |            |            |            |            |
| PF10_0348_Kilifi_186         |            |            |            |            |            |            |            |            |
| PF10_0348_Kilifi_191         |            |            |            |            |            |            |            |            |
| PF10_0348_Kilifi_199         |            |            |            |            |            |            |            |            |
| PF10_0348_Kilifi_235         |            |            |            |            |            |            |            |            |
| PF10_0348_Kilifi_242         |            |            |            |            |            |            |            |            |
| PF10_0348_Kilifi_245         |            |            |            |            |            |            |            |            |
| PF10_0348_Kilifi_248         |            |            |            |            |            |            |            |            |
| PF10_0348_Kilifi_249         |            |            |            |            |            |            |            |            |
| PF10_0348_Kilifi_262         |            |            |            |            |            |            |            |            |
| PF10_0348_Kilifi_289         |            |            |            |            |            |            |            |            |
| PF10_0348_Kilifi_290         |            |            | .G.        |            |            |            |            |            |
| PF10_0348_Kilifi_297         |            |            | .G.        |            |            |            |            |            |
| PF10_0348_Kilifi_299         |            |            | .G.        |            |            |            |            |            |
| PF10_0348_Kilifi_310         |            |            | .G.        |            |            |            |            |            |
| PF10_0348_Kilifi_319         |            |            |            |            |            |            |            |            |
| PF10_0348_Kilifi_324         |            |            |            |            |            |            |            |            |
| PF10_0348_Kilifi_333         |            |            |            |            |            |            |            |            |
| PF10_0348_Kilifi_334         |            |            | .G.        |            |            |            |            |            |
| PF10_0348_Kilifi_336         |            |            | .G.        |            |            |            |            |            |
| PF10_0348_Kilifi_344         |            |            |            |            |            |            |            |            |
| PF10_0348_Kilifi_345         |            |            |            |            |            |            |            |            |
| PF10_0348_Kilifi_349         |            |            |            |            |            |            |            |            |
| PF10_0348_Kilifi_359         |            |            |            |            |            |            |            |            |
| PF10_0348_Kilifi_364         |            |            |            |            |            |            |            |            |
| PF10_0348_Kilifi_389         |            |            |            |            |            |            |            |            |
| PF10_0348_Kilifi_406         |            |            | .G.        |            |            |            |            |            |
| PF10_0348_Kilifi_528         |            |            | .G.        |            |            |            |            |            |
| PF10_0348_Kilifi_388         |            |            |            |            |            |            |            |            |
| PF10_0348_Kilifi_365         |            |            |            |            |            |            |            |            |
| PF10_0348_Kilifi_323         |            |            |            |            |            |            |            |            |
| PF10_0348_Kilifi_028         |            |            |            |            |            |            |            |            |
| PF10_0348_Kilifi_110         |            |            | .G.        |            |            |            |            |            |
| PF10_0348_Kilifi_128         |            |            |            |            |            |            |            |            |
| PF10_0348_Kilifi_214         |            |            |            |            |            |            |            |            |
| PF10_0348_Kilifi_216         |            |            |            |            |            |            |            |            |
| PF10_0348_Kilifi_314         |            |            | .G.A.      |            |            |            |            |            |
| PF10_0348_Kilifi_384         |            |            |            |            |            |            |            |            |
| PF10_0348_Kilifi_298         |            |            |            |            |            |            |            |            |
| PF10_0348_Kilifi_020         |            |            |            |            |            |            |            |            |
| PF10_0348_Kilifi_052         |            |            |            |            |            |            |            |            |
| PF10_0348_Kilifi_164         |            |            |            |            |            |            |            |            |
| PF10_0348_Kilifi_194         |            |            |            |            |            |            |            |            |
| PF10_0348_Kilifi_302         |            |            |            |            |            |            |            |            |
| PF10_0348_Kilifi_304         |            |            |            |            |            |            |            |            |
| PF10_0348_Kilifi_311         |            |            |            |            |            |            |            |            |
| PF10_0348_Kilifi_321         |            |            |            |            |            |            |            |            |
| PF10_0348_Kilifi_044         |            |            |            |            |            |            |            |            |
| PF10_0348_Kilifi_356         |            |            |            |            |            |            |            |            |
| PF10_0348_Kilifi_045         |            |            |            |            |            |            |            |            |
| <i>Plasmodium reichenowi</i> |            |            |            | .G.        | A.         |            | G.         |            |







2170

....|....| ..  
TTTCAAAAAT AA

PF10\_0348\_3D7  
PF10\_0348\_Kilifi\_019  
PF10\_0348\_Kilifi\_021  
PF10\_0348\_Kilifi\_023  
PF10\_0348\_Kilifi\_027  
PF10\_0348\_Kilifi\_050  
PF10\_0348\_Kilifi\_057  
PF10\_0348\_Kilifi\_062  
PF10\_0348\_Kilifi\_082  
PF10\_0348\_Kilifi\_091  
PF10\_0348\_Kilifi\_093  
PF10\_0348\_Kilifi\_097  
PF10\_0348\_Kilifi\_105  
PF10\_0348\_Kilifi\_160  
PF10\_0348\_Kilifi\_162  
PF10\_0348\_Kilifi\_186  
PF10\_0348\_Kilifi\_191  
PF10\_0348\_Kilifi\_199  
PF10\_0348\_Kilifi\_235  
PF10\_0348\_Kilifi\_242  
PF10\_0348\_Kilifi\_245  
PF10\_0348\_Kilifi\_248  
PF10\_0348\_Kilifi\_249  
PF10\_0348\_Kilifi\_262  
PF10\_0348\_Kilifi\_289  
PF10\_0348\_Kilifi\_290  
PF10\_0348\_Kilifi\_297  
PF10\_0348\_Kilifi\_299  
PF10\_0348\_Kilifi\_310  
PF10\_0348\_Kilifi\_319  
PF10\_0348\_Kilifi\_324  
PF10\_0348\_Kilifi\_333  
PF10\_0348\_Kilifi\_334  
PF10\_0348\_Kilifi\_336  
PF10\_0348\_Kilifi\_344  
PF10\_0348\_Kilifi\_345  
PF10\_0348\_Kilifi\_349  
PF10\_0348\_Kilifi\_359  
PF10\_0348\_Kilifi\_364  
PF10\_0348\_Kilifi\_389  
PF10\_0348\_Kilifi\_406  
PF10\_0348\_Kilifi\_528  
PF10\_0348\_Kilifi\_388  
PF10\_0348\_Kilifi\_365  
PF10\_0348\_Kilifi\_323  
PF10\_0348\_Kilifi\_028  
PF10\_0348\_Kilifi\_110  
PF10\_0348\_Kilifi\_128  
PF10\_0348\_Kilifi\_214  
PF10\_0348\_Kilifi\_216  
PF10\_0348\_Kilifi\_314  
PF10\_0348\_Kilifi\_384  
PF10\_0348\_Kilifi\_298  
PF10\_0348\_Kilifi\_020  
PF10\_0348\_Kilifi\_052  
PF10\_0348\_Kilifi\_164  
PF10\_0348\_Kilifi\_194  
PF10\_0348\_Kilifi\_302  
PF10\_0348\_Kilifi\_304  
PF10\_0348\_Kilifi\_311  
PF10\_0348\_Kilifi\_321  
PF10\_0348\_Kilifi\_044  
PF10\_0348\_Kilifi\_356  
PF10\_0348\_Kilifi\_045  
*Plasmodium reichenowi*



|                              | 90          | 100        | 110         | 120        | 130        | 140          | 150        | 160         |
|------------------------------|-------------|------------|-------------|------------|------------|--------------|------------|-------------|
| PF10_0355_3D7                | .... ....   | .... ....  | .... ....   | .... ....  | .... ....  | .... ....    | .... ....  | .... ....   |
| PF10_0355_Kilifi_019         | TGTTGTAAT   | GAGGGGAACC | CTAATTTAAG  | AAATAACATA | ATTAATGATG | ATGAACTAAA   | GGGGAAAGCA | TATAATAATA  |
| PF10_0355_Kilifi_020         | .....       | .....      | .....       | .....      | .....      | .....T.....  | .....      | .....       |
| PF10_0355_Kilifi_021         | .....       | .....      | .....       | .....      | .....      | .....T.....  | .....      | .....       |
| PF10_0355_Kilifi_023         | .....       | .....      | .....       | .....      | .....      | .....T.....  | .....      | .....       |
| PF10_0355_Kilifi_027         | .....       | .....      | .....       | .....      | .....      | .....T.....  | .....      | .....       |
| PF10_0355_Kilifi_028         | .....       | .....      | .....       | .....      | .....      | .....T.....  | .....      | .....       |
| PF10_0355_Kilifi_050         | .....       | .....      | .....       | .....      | .....      | .....TT..... | .....      | .....       |
| PF10_0355_Kilifi_082         | .....       | .....      | .....       | .....      | .....      | .....T.....  | .....      | .....       |
| PF10_0355_Kilifi_084         | .....       | .....      | .....       | .....      | .....      | .....T.....  | .....      | .....       |
| PF10_0355_Kilifi_091         | .....       | .....      | .....       | .....      | .....      | .....T.....  | .....      | .....       |
| PF10_0355_Kilifi_093         | .....       | .....      | .....       | .....      | .....      | .....T.....  | .....      | .....       |
| PF10_0355_Kilifi_097         | .....       | .....      | .....       | .....      | .....      | .....T.....  | .....      | .....       |
| PF10_0355_Kilifi_105         | .....       | .....      | ..C.....    | .....      | .....      | .....T.....  | .....      | .....       |
| PF10_0355_Kilifi_110         | .....       | .....      | .....       | .....      | .....      | .....T.....  | .....      | .....       |
| PF10_0355_Kilifi_124         | .....       | .....      | .....       | .....      | .....      | .....T.....  | .....      | .....       |
| PF10_0355_Kilifi_128         | .....       | .....      | .....       | .....      | .....      | .....T.....  | .....      | .....       |
| PF10_0355_Kilifi_150         | .....       | .....      | .....       | .....      | .....      | .....T.....  | .....      | .....       |
| PF10_0355_Kilifi_160         | .....       | .....      | .....       | .....      | .....      | .....T.....  | .....      | .....       |
| PF10_0355_Kilifi_162         | .....       | .....      | .....       | .....      | .....      | .....T.....  | .....      | .....       |
| PF10_0355_Kilifi_164         | .....       | .....      | .....       | .....      | .....      | .....T.....  | .....      | .....       |
| PF10_0355_Kilifi_187         | .....       | .....      | .....       | .....      | .....      | .....T.....  | .....      | .....       |
| PF10_0355_Kilifi_191         | .....       | .....      | .....       | .....      | .....      | .....T.....  | .....      | .....       |
| PF10_0355_Kilifi_194         | .....       | .....      | .....       | .....      | .....      | .....T.....  | .....      | .....       |
| PF10_0355_Kilifi_199         | .....       | .....      | .....       | .....      | .....      | .....T.....  | .....      | .....       |
| PF10_0355_Kilifi_201         | .....       | .....      | .....       | .....      | .....      | .....T.....  | .....      | .....       |
| PF10_0355_Kilifi_202         | .....       | .....      | .....       | .....      | .....      | .....T.....  | .....      | .....       |
| PF10_0355_Kilifi_214         | .....       | .....      | .....       | .....      | .....      | .....T.....  | .....      | .....       |
| PF10_0355_Kilifi_216         | .....       | .....      | .....       | .....      | .....      | .....T.....  | .....      | .....       |
| PF10_0355_Kilifi_229         | .....       | .....      | .....       | .....      | .....      | .....T.....  | .....      | .....       |
| PF10_0355_Kilifi_235         | .....       | .....      | .....       | .....      | .....      | .....T.....  | .....      | .....       |
| PF10_0355_Kilifi_240         | .....       | .....      | .....       | .....      | .....      | .....T.....  | .....      | .....       |
| PF10_0355_Kilifi_245         | .....       | .....      | .....       | .....      | .....      | .....T.....  | .....      | .....       |
| PF10_0355_Kilifi_248         | .....       | .....      | ..C.....    | .....      | .....      | .....T.....  | .....      | .....       |
| PF10_0355_Kilifi_250         | .....       | .....      | .....       | .....      | .....      | .....T.....  | .....      | .....       |
| PF10_0355_Kilifi_262         | .....       | .....      | .....       | .....      | .....      | .....T.....  | .....      | .....       |
| PF10_0355_Kilifi_289         | .....       | .....      | .....       | .....      | .....      | .....T.....  | .....      | .....       |
| PF10_0355_Kilifi_297         | .....       | .....      | .....       | .....      | .....      | .....T.....  | .....      | .....       |
| PF10_0355_Kilifi_298         | .....       | .....      | .....       | .....      | .....      | .....T.....  | .....      | .....       |
| PF10_0355_Kilifi_299         | .....       | .....      | .....       | .....      | .....      | .....T.....  | .....      | .....       |
| PF10_0355_Kilifi_302         | .....       | .....      | .....       | .....      | .....      | .....T.....  | .....      | .....       |
| PF10_0355_Kilifi_307         | .....       | .....      | .....       | .....      | .....      | .....T.....  | .....      | .....       |
| PF10_0355_Kilifi_311         | .....       | .....      | .....       | .....      | .....      | .....T.....  | .....      | .....       |
| PF10_0355_Kilifi_314         | .....       | .....      | .....       | .....      | .....      | .....T.....  | .....      | .....       |
| PF10_0355_Kilifi_319         | .....       | .....      | .....       | .....      | .....      | .....T.....  | .....      | .....       |
| PF10_0355_Kilifi_321         | .....       | .....      | .....       | .....      | .....      | .....T.....  | .....      | .....       |
| PF10_0355_Kilifi_322         | .....       | .....      | .....       | .....      | .....      | .....T.....  | .....      | .....       |
| PF10_0355_Kilifi_323         | .....       | .....      | .....       | .....      | .....      | .....T.....  | .....      | .....       |
| PF10_0355_Kilifi_324         | .....       | .....      | .....       | .....      | .....      | .....T.....  | .....      | .....       |
| PF10_0355_Kilifi_328         | .....       | .....      | .....       | .....      | .....      | .....T.....  | .....      | .....       |
| PF10_0355_Kilifi_333         | .....       | .....      | .....       | .....      | .....      | .....T.....  | .....      | .....       |
| PF10_0355_Kilifi_334         | .....       | .....      | .....       | .....      | .....      | .....T.....  | .....      | .....       |
| PF10_0355_Kilifi_336         | .....       | .....      | .....       | .....      | .....      | .....T.....  | .....      | .....       |
| PF10_0355_Kilifi_340         | .....       | .....      | .....       | .....      | .....      | .....T.....  | .....      | .....       |
| PF10_0355_Kilifi_343         | .....       | .....      | .....       | .....      | .....      | .....T.....  | .....      | .....       |
| PF10_0355_Kilifi_344         | .....       | .....      | .....       | .....      | .....      | .....T.....  | .....      | .....       |
| PF10_0355_Kilifi_345         | .....       | .....      | .....       | .....      | .....      | .....T.....  | .....      | .....       |
| PF10_0355_Kilifi_349         | .....       | .....      | .....       | .....      | .....      | .....T.....  | .....      | .....       |
| PF10_0355_Kilifi_356         | .....       | .....      | .....       | .....      | .....      | .....T.....  | .....      | .....       |
| PF10_0355_Kilifi_359         | .....       | ..A.....   | .....       | .....      | .....      | .....T.....  | .....      | .....       |
| PF10_0355_Kilifi_364         | .....       | .....      | .....       | .....      | .....      | .....T.....  | .....      | .....       |
| PF10_0355_Kilifi_365         | .....       | .....      | .....       | .....      | .....      | .....T.....  | .....      | .....       |
| PF10_0355_Kilifi_384         | .....       | .....      | .....       | .....      | .....      | .....T.....  | .....      | .....       |
| PF10_0355_Kilifi_406         | .....       | ..G.....   | .....       | .....      | .....      | .....T.....  | .....      | .....       |
| <i>Plasmodium reichenowi</i> | .....A..... | .....      | .....T..... | .....      | .....      | .....T.....  | .....      | .....A..... |

|                              | 170        | 180        | 190        | 200        | 210        | 220        | 230        | 240        |
|------------------------------|------------|------------|------------|------------|------------|------------|------------|------------|
| PF10_0355_3D7                | CTATAGATGC | TAATAACCAA | AATATAGAAT | ATAATAAAAA | CTTAAAGCAC | AATGTAAACT | CATCTCATAT | ATCTAAATTT |
| PF10_0355_Kilifi_019         |            |            |            |            | G          |            |            |            |
| PF10_0355_Kilifi_020         |            |            |            |            | G          |            |            |            |
| PF10_0355_Kilifi_021         |            |            |            |            | G          |            |            |            |
| PF10_0355_Kilifi_023         |            |            |            |            | G          |            |            |            |
| PF10_0355_Kilifi_027         |            |            |            |            | G          |            |            |            |
| PF10_0355_Kilifi_028         |            |            |            |            | G          |            |            |            |
| PF10_0355_Kilifi_050         |            |            |            |            | G          |            | T          |            |
| PF10_0355_Kilifi_082         |            |            |            |            | G          |            |            |            |
| PF10_0355_Kilifi_084         |            |            |            |            | G          |            |            |            |
| PF10_0355_Kilifi_091         |            |            |            |            | G          |            |            |            |
| PF10_0355_Kilifi_093         |            |            |            |            | G          |            |            |            |
| PF10_0355_Kilifi_097         |            |            |            |            | G          |            |            |            |
| PF10_0355_Kilifi_105         |            | A          |            |            | G          |            |            |            |
| PF10_0355_Kilifi_110         |            |            |            |            | G          |            |            |            |
| PF10_0355_Kilifi_124         |            |            |            |            | G          |            |            |            |
| PF10_0355_Kilifi_128         |            |            |            |            | G          |            |            |            |
| PF10_0355_Kilifi_150         |            |            |            |            | G          |            |            |            |
| PF10_0355_Kilifi_160         |            |            |            |            | G          |            |            |            |
| PF10_0355_Kilifi_162         |            |            |            |            | G          |            | T          | T          |
| PF10_0355_Kilifi_164         |            |            |            |            | G          |            |            |            |
| PF10_0355_Kilifi_187         |            |            |            |            | G          |            |            |            |
| PF10_0355_Kilifi_191         |            |            |            |            | G          |            |            |            |
| PF10_0355_Kilifi_194         |            |            |            |            | G          |            |            |            |
| PF10_0355_Kilifi_199         |            |            |            |            | G          |            |            |            |
| PF10_0355_Kilifi_201         |            |            |            |            | G          |            |            |            |
| PF10_0355_Kilifi_202         |            |            |            |            | G          |            |            |            |
| PF10_0355_Kilifi_214         |            |            |            |            | G          |            |            |            |
| PF10_0355_Kilifi_216         |            |            |            |            | G          |            |            |            |
| PF10_0355_Kilifi_229         |            |            |            |            | G          |            |            |            |
| PF10_0355_Kilifi_235         |            |            |            |            | G          |            |            |            |
| PF10_0355_Kilifi_240         |            | G          |            |            | G          |            |            |            |
| PF10_0355_Kilifi_245         |            |            |            |            | G          |            |            |            |
| PF10_0355_Kilifi_248         |            | A          |            |            | G          |            |            |            |
| PF10_0355_Kilifi_250         |            |            |            |            | G          |            |            |            |
| PF10_0355_Kilifi_262         |            |            |            |            | G          |            |            |            |
| PF10_0355_Kilifi_289         |            |            |            |            | G          |            |            |            |
| PF10_0355_Kilifi_297         |            |            |            |            | G          |            |            |            |
| PF10_0355_Kilifi_298         |            |            |            |            | G          |            |            |            |
| PF10_0355_Kilifi_299         |            |            |            |            | G          |            |            |            |
| PF10_0355_Kilifi_302         |            |            |            |            | G          |            |            |            |
| PF10_0355_Kilifi_307         |            |            |            |            | G          |            |            |            |
| PF10_0355_Kilifi_311         |            |            |            |            | G          |            |            |            |
| PF10_0355_Kilifi_314         |            |            |            |            | G          |            |            |            |
| PF10_0355_Kilifi_319         |            |            |            |            | G          |            |            |            |
| PF10_0355_Kilifi_321         |            |            |            |            | G          |            |            |            |
| PF10_0355_Kilifi_322         |            |            |            |            | G          |            |            |            |
| PF10_0355_Kilifi_323         |            |            |            |            | G          |            |            |            |
| PF10_0355_Kilifi_324         |            |            |            | G          | G          |            |            |            |
| PF10_0355_Kilifi_328         |            |            |            |            | G          |            |            |            |
| PF10_0355_Kilifi_333         |            |            |            |            | G          |            |            |            |
| PF10_0355_Kilifi_334         |            |            |            |            | G          |            |            | T          |
| PF10_0355_Kilifi_336         |            |            |            |            | G          |            |            |            |
| PF10_0355_Kilifi_340         |            |            |            |            | G          |            |            |            |
| PF10_0355_Kilifi_343         |            |            |            |            | G          |            |            |            |
| PF10_0355_Kilifi_344         |            |            |            |            | G          |            |            |            |
| PF10_0355_Kilifi_345         |            |            |            |            | G          |            |            |            |
| PF10_0355_Kilifi_349         |            |            |            |            | G          |            |            |            |
| PF10_0355_Kilifi_356         |            |            |            |            | G          |            |            |            |
| PF10_0355_Kilifi_359         |            |            |            |            | G          |            |            |            |
| PF10_0355_Kilifi_364         |            |            |            |            | G          |            |            |            |
| PF10_0355_Kilifi_365         |            | G          |            |            | G          |            | T          | T          |
| PF10_0355_Kilifi_384         |            |            |            |            | G          |            |            |            |
| PF10_0355_Kilifi_406         |            |            |            |            | G          |            |            |            |
| <i>Plasmodium reichenowi</i> |            | T          |            | T          |            | T          | G          |            |









|                              | 490        | 500         | 510        | 520       | 530       | 540        | 550        | 560        |
|------------------------------|------------|-------------|------------|-----------|-----------|------------|------------|------------|
| PF10_0355_3D7                | ---TTTAATA | AATGTCCTAC  | TGAAGAGATT | TGTAAGACT | TTAGTAACT | TCCACAATGT | CGAAGAATG  | TACATGAA-- |
| PF10_0355_Kilifi_019         | ---CC..... | GT.....     | A.....     | T.....    | .G..CC... |            | G.....     |            |
| PF10_0355_Kilifi_020         | AATCA.T... | GA.A.A.TT.. | T.GTA      | .CAA...G. | G.TA.T... | .CTCTA.A.  | ATTTCACTGG |            |
| PF10_0355_Kilifi_021         | ---CC..... | GT.....     | A.....     | T.....    | .G..CC... |            | G.....     |            |
| PF10_0355_Kilifi_023         | ---CC..... | GT.....     | A.....     | T.....    | .G..CC... |            | G.....     |            |
| PF10_0355_Kilifi_027         | ---CC..... | GT.....     | A.....     | T.....    | .G..CC... |            | G.....     |            |
| PF10_0355_Kilifi_028         | ---        |             |            |           |           |            |            |            |
| PF10_0355_Kilifi_050         | ---CC..... | GT.....     | A.....     | T.....    | .G..CC... |            | G.....     |            |
| PF10_0355_Kilifi_082         | ---CC..... | GT.....     | A.....     | T.....    | .G..CC... |            | G.....     |            |
| PF10_0355_Kilifi_084         | ---CC..... | GT.....     | A.....     | T.....    | .G..CC... |            | G.....     |            |
| PF10_0355_Kilifi_091         | ---CC..... | GT.....     | A.....     | T.....    | .G..CC... |            | G.....     |            |
| PF10_0355_Kilifi_093         | ---        |             |            |           |           |            |            |            |
| PF10_0355_Kilifi_097         | ---        |             |            |           |           |            |            |            |
| PF10_0355_Kilifi_105         | ---        |             |            |           |           |            |            |            |
| PF10_0355_Kilifi_110         | AATCA.T... | GA.A.A.TT.. | T.GTA      | .CAA...G. | G.TA.T... | .CTCTA.A.  | ATTTCACTGG |            |
| PF10_0355_Kilifi_124         | ---        |             |            |           |           |            |            |            |
| PF10_0355_Kilifi_128         | ---        |             |            |           |           |            |            |            |
| PF10_0355_Kilifi_150         | ---CC..... | GT.....     | A.....     | T.....    | .G..CC... |            | G.....     |            |
| PF10_0355_Kilifi_160         | ---        |             |            |           |           |            |            |            |
| PF10_0355_Kilifi_162         | ---CC..... | GT.....     | A.....     | T.....    | .G..CC... |            | G.....     |            |
| PF10_0355_Kilifi_164         | AATCA.T... | GA.A.A.TT.. | T.GTA      | .CAA...G. | G.TA.T... | .CTCTA.A.  | ATTTCACTGG |            |
| PF10_0355_Kilifi_187         | ---CC..... | GT.....     | A.....     | T.....    | .G..CC... |            | G.....     |            |
| PF10_0355_Kilifi_191         | ---        |             |            |           |           |            |            |            |
| PF10_0355_Kilifi_194         | ---CC..... | GT.....     | A.....     | T.....    | .G..CC... |            | G.....     |            |
| PF10_0355_Kilifi_199         | AATCA.T... | GA.A.A.TT.. | T.GTA      | .CAA...G. | G.TA.T... | .CTCTA.A.  | ATTTCACTGG |            |
| PF10_0355_Kilifi_201         | ---CC..... | GT.....     | A.....     | T.....    | .G..CC... |            | G.....     |            |
| PF10_0355_Kilifi_202         | ---CC..... | GT.....     | A.....     | T.....    | .G..CC... |            | G.....     |            |
| PF10_0355_Kilifi_214         | AATCA.T... | GA.A.A.TT.. | T.GTA      | .CAA...G. | G.TA.T... | .CTCTA.A.  | ATTTCACTGG |            |
| PF10_0355_Kilifi_216         | ---        |             |            |           |           |            |            |            |
| PF10_0355_Kilifi_229         | ---        |             |            |           |           |            |            |            |
| PF10_0355_Kilifi_235         | ---CC..... | GT.....     | A.....     | T.....    | .G..CC... |            | G.....     |            |
| PF10_0355_Kilifi_240         | ---CC..... | GT.....     | A.....     | T.....    | .G..CC... |            | G.....     |            |
| PF10_0355_Kilifi_245         | ---        |             |            |           |           |            |            |            |
| PF10_0355_Kilifi_248         | ---        |             |            |           |           |            |            |            |
| PF10_0355_Kilifi_250         | ---CC..... | GT.....     | A.....     | T.....    | .G..CC... |            | G.....     |            |
| PF10_0355_Kilifi_262         | ---        |             |            |           |           |            |            |            |
| PF10_0355_Kilifi_289         | ---CC..... | GT.....     | A.....     | T.....    | .G..CC... |            | G.....     |            |
| PF10_0355_Kilifi_297         | ---CC..... | GT.....     | A.....     | T.....    | .G..CC... |            | G.....     |            |
| PF10_0355_Kilifi_298         | ---C.....  | GT.....     | A.....     | T.....    | .G..CC... |            | G.....     |            |
| PF10_0355_Kilifi_299         | ---        |             |            |           |           |            |            |            |
| PF10_0355_Kilifi_302         | ---CC..... | GT.....     | A.....     | T.....    | .G..CC... |            | G.....     |            |
| PF10_0355_Kilifi_307         | ---CC..... | GT.....     | A.....     | T.....    | .G..CC... |            | G.....     |            |
| PF10_0355_Kilifi_311         | AATCA.T... | GA.A.A.TT.. | T.GTA      | .CAA...G. | G.TA.T... | .CTCTA.A.  | ATTTCACTGG |            |
| PF10_0355_Kilifi_314         | ---        |             |            |           |           |            |            |            |
| PF10_0355_Kilifi_319         | AATCA.T... | GA.A.A.TT.. | T.GTA      | .CAA...G. | G.TA.T... | .CTCTA.A.  | ATTTCACTGG |            |
| PF10_0355_Kilifi_321         | ---        |             |            |           |           |            |            |            |
| PF10_0355_Kilifi_322         | ---CC..... | GT.....     | A.....     | T.....    | .G..CC... |            | G.....     |            |
| PF10_0355_Kilifi_323         | ---CC..... | GT.....     | A.....     | T.....    | .G..CC... |            | G.....     |            |
| PF10_0355_Kilifi_324         | ---CC..... | GT.....     | A.....     | T.....    | .G..CC... |            | G.....     |            |
| PF10_0355_Kilifi_328         | ---CC..... | GT.....     | A.....     | T.....    | .G..CC... |            | G.....     |            |
| PF10_0355_Kilifi_333         | ---CC..... | GT.....     | A.....     | T.....    | .G..CC... |            | G.....     |            |
| PF10_0355_Kilifi_334         | AATCA.T... | GA.A.A.TT.. | T.GTA      | .CAA...G. | G.TA.T... | .CTCTA.A.  | ATTTCACTGG |            |
| PF10_0355_Kilifi_336         | ---CC..... | GT.....     | A.....     | T.....    | .G..CC... |            | G.....     |            |
| PF10_0355_Kilifi_340         | AATCA.T... | GA.A.A.TT.. | T.GTA      | .CAA...G. | G.TA.T... | .CTCTA.A.  | ATTTCACTGG |            |
| PF10_0355_Kilifi_343         | ---        |             |            |           |           |            |            |            |
| PF10_0355_Kilifi_344         | AATCA.T... | GA.A.A.TT.. | T.GTA      | .CAA...G. | G.TA.T... | .CTCTA.A.  | ATTTCACTGG |            |
| PF10_0355_Kilifi_345         | ---CC..... | GT.....     | A.....     | T.....    | .G..CC... |            | G.....     |            |
| PF10_0355_Kilifi_349         | ---CC..... | GT.....     | A.....     | T.....    | .G..CC... |            | G.....     |            |
| PF10_0355_Kilifi_356         | ---        |             |            |           |           |            |            |            |
| PF10_0355_Kilifi_359         | ---CC..... | GT.....     | A.....     | T.....    | .G..CC... |            | G.....     |            |
| PF10_0355_Kilifi_364         | ---CC..... | GT.....     | A.....     | T.....    | .G..CC... |            | G.....     |            |
| PF10_0355_Kilifi_365         | ---C.....  | GT.....     | A.....     | T.....    | .G..CC... |            | G.....     |            |
| PF10_0355_Kilifi_384         | ---CC..... | GT.....     | A.....     | T.....    | .G..CC... |            | G.....     |            |
| PF10_0355_Kilifi_406         | ---CC..... | GT.....     | A.....     | T.....    | .G..CC... |            | G.....     |            |
| <i>Plasmodium reichenowi</i> | ---CC..... | GT.....     | A.....     | T.....    | .G..TCA.C | .A.GA..... | T.....     |            |

|                              | 570        | 580        | 590        | 600        | 610        | 620        | 630        | 640        |
|------------------------------|------------|------------|------------|------------|------------|------------|------------|------------|
| PF10_0355_3D7                | .... ....  | .... ....  | .... ....  | .... ....  | .... ....  | .... ....  | .... ....  | .... ....  |
| PF10_0355_Kilifi_019         | ----AGAAAT | AATGTGGTGG | GCTCAAGTGT | AAAAAATTTT | TCAAGTGATA | ATAAGGGGGT | TCTTGTTCCT | CCAAGAAGAC |
| PF10_0355_Kilifi_020         | TACA.A.GG. | G....GCTA  | ....A...   | C.G....C   | .T..CA.T.. | ....A..T.. | C.....C    | .....A     |
| PF10_0355_Kilifi_021         | ----       | .....A     | ....A...   | ....A...   | .....      | .....      | .....      | .....      |
| PF10_0355_Kilifi_023         | ----       | .....A     | ....A...   | ....A...   | .....      | .....      | .....      | .....      |
| PF10_0355_Kilifi_027         | ----       | .....A     | ....A...   | ....A...   | .....      | .....      | .....      | .....      |
| PF10_0355_Kilifi_028         | ----       | .....A     | ....A...   | ....A...   | .....      | .....      | .....      | .....      |
| PF10_0355_Kilifi_050         | ----       | .....A     | ....A...   | ....A...   | .....      | .....      | .....      | .....      |
| PF10_0355_Kilifi_082         | ----       | .....A     | ....A...   | ....A...   | .....T     | ....A..    | .....      | .....      |
| PF10_0355_Kilifi_084         | ----       | .....A     | ....A...   | ....A...   | .....      | .....      | .....      | .....      |
| PF10_0355_Kilifi_091         | ----       | .....A     | ....A...   | ....A...   | .....      | .....      | .....      | .....      |
| PF10_0355_Kilifi_093         | ----       | .....      | .....      | .....      | .....      | .....      | .....      | .....      |
| PF10_0355_Kilifi_097         | ----       | .....      | .....      | .....      | .....      | .....      | .....      | .....      |
| PF10_0355_Kilifi_105         | ----       | .....      | .....      | .....      | .....      | .....      | .....      | .....      |
| PF10_0355_Kilifi_110         | TACA.A.GG. | G....GCTA  | ....A...   | C.G....C   | .T..CA.T.. | ....A..T.. | C.....C    | .....A     |
| PF10_0355_Kilifi_124         | ----       | .....      | .....      | .....      | .....      | .....      | .....      | .....      |
| PF10_0355_Kilifi_128         | ----       | .....      | .....      | .....      | .....      | .....      | .....      | .....      |
| PF10_0355_Kilifi_150         | ----       | .....A     | ....A...   | ....A...   | .....      | .....      | .....      | .....      |
| PF10_0355_Kilifi_160         | ----       | .....      | .....      | .....      | .....      | .....      | .....      | .....      |
| PF10_0355_Kilifi_162         | ----       | .....A     | ....A...   | ....A...   | .....      | .....      | .....      | .....      |
| PF10_0355_Kilifi_164         | TACA.A.GG. | G....GCTA  | ....A...   | C.G....C   | .T..CA.T.. | ....A..T.. | C.....C    | .....A     |
| PF10_0355_Kilifi_187         | ----       | .....A     | ....A...   | ....A...   | .....      | .....      | .....      | .....      |
| PF10_0355_Kilifi_191         | ----       | .....      | .....      | .....      | .....      | .....      | .....      | .....      |
| PF10_0355_Kilifi_194         | ----       | .....A     | ....A...   | ....A...   | .....      | .....      | .....      | .....      |
| PF10_0355_Kilifi_199         | TACA.A.GG. | G....GCTA  | ....A...   | C.G....C   | .T..CA.T.. | ....A..T.. | C.....C    | .....A     |
| PF10_0355_Kilifi_201         | ----       | .....A     | ....A...   | ....A...   | .....      | .....      | .....      | .....      |
| PF10_0355_Kilifi_202         | ----       | .....A     | ....A...   | ....A...   | .....      | .....      | .....      | .....      |
| PF10_0355_Kilifi_214         | TACA.A.GG. | G....GCTA  | ....A...   | C.G....C   | .T..CA.T.. | ....A..T.. | C.....C    | .....A     |
| PF10_0355_Kilifi_216         | ----       | .....      | .....      | .....      | .....      | .....      | .....      | .....      |
| PF10_0355_Kilifi_229         | ----       | .....      | .....      | .....      | .....      | .....      | .....      | .....      |
| PF10_0355_Kilifi_235         | ----       | .....A     | ....A...   | ....A...   | .....      | .....      | .....      | .....      |
| PF10_0355_Kilifi_240         | ----       | .....A     | ....A...   | ....A...   | .....      | .....      | .....      | .....      |
| PF10_0355_Kilifi_245         | ----       | .....      | .....      | .....      | .....      | .....      | .....      | .....      |
| PF10_0355_Kilifi_248         | ----       | .....      | .....      | .....      | .....      | .....      | .....      | .....      |
| PF10_0355_Kilifi_250         | ----       | .....A     | ....A...   | ....A...   | .....T     | ....A..    | .....      | .....      |
| PF10_0355_Kilifi_262         | ----       | .....      | .....      | .....      | .....      | .....      | .....      | .....      |
| PF10_0355_Kilifi_289         | ----       | .....A     | ....A...   | ....A...   | .....      | .....      | .....      | .....      |
| PF10_0355_Kilifi_297         | ----       | .....A     | ....A...   | ....A...   | .....      | .....      | .....      | .....      |
| PF10_0355_Kilifi_298         | ----       | .....A     | ....A...   | ....A...   | .....      | .....      | .....      | .....      |
| PF10_0355_Kilifi_299         | ----       | .....A     | ....A...   | ....A...   | .....      | .....      | .....      | .....      |
| PF10_0355_Kilifi_302         | ----       | .....A     | ....A...   | ....A...   | .....T     | ....A..    | .....      | .....      |
| PF10_0355_Kilifi_307         | ----       | .....A     | ....A...   | ....A...   | .....      | .....      | .....      | .....      |
| PF10_0355_Kilifi_311         | TACA.A.GG. | G....GCTA  | ....A...   | C.G....C   | .T..CA.T.. | ....A..T.. | C.....C    | .....A     |
| PF10_0355_Kilifi_314         | ----       | .....      | .....      | .....      | .....      | .....      | .....      | .....      |
| PF10_0355_Kilifi_319         | TACA.A.GG. | G....GCTA  | ....A...   | C.G....C   | .T..CA.T.. | ....A..T.. | C.....C    | .....A     |
| PF10_0355_Kilifi_321         | ----       | .....      | .....      | .....      | .....      | .....      | .....      | .....      |
| PF10_0355_Kilifi_322         | ----       | .....A     | ....A...   | ....A...   | .....      | .....      | .....      | .....      |
| PF10_0355_Kilifi_323         | ----       | .....A     | ....A...   | ....A...   | .....      | .....      | .....      | .....      |
| PF10_0355_Kilifi_324         | ----       | .....A     | ....A...   | ....A...   | .....      | .....      | .....      | .....      |
| PF10_0355_Kilifi_328         | ----       | .....A     | ....A...   | ....A...   | .....      | .....      | .....      | .....      |
| PF10_0355_Kilifi_333         | ----       | .....A     | ....A...   | ....A...   | .....T     | ....A..    | .....      | .....      |
| PF10_0355_Kilifi_334         | TACA.A.GG. | G....GCTA  | ....A...   | C.G....C   | .T..CA.T.. | ....A..T.. | C.....C    | .....A     |
| PF10_0355_Kilifi_336         | ----       | .....A     | ....A...   | ....A...   | .....T     | ....A..    | .....      | .....      |
| PF10_0355_Kilifi_340         | TACA.A.GG. | G....GCTA  | ....A...   | C.G....C   | .T..CA.T.. | ....A..T.. | C.....C    | .....A     |
| PF10_0355_Kilifi_343         | ----       | .....      | .....      | .....      | .....      | .....      | .....      | .....      |
| PF10_0355_Kilifi_344         | TACA.A.GG. | G....GCTA  | ....A...   | C.G....C   | .T..CA.T.. | ....A..T.. | C.....C    | .....A     |
| PF10_0355_Kilifi_345         | ----       | .....A     | ....A...   | ....A...   | .....      | .....      | .....      | .....      |
| PF10_0355_Kilifi_349         | ----       | .....A     | ....A...   | ....A...   | .....      | .....      | .....      | .....      |
| PF10_0355_Kilifi_356         | ----       | .....      | .....      | .....      | .....      | .....      | .....      | .....      |
| PF10_0355_Kilifi_359         | ----       | .....A     | ....A...   | ....A...   | .....      | .....      | .....      | .....      |
| PF10_0355_Kilifi_364         | ----       | .....A     | ....A...   | ....A...   | .....      | .....      | .....      | .....      |
| PF10_0355_Kilifi_365         | ----       | .....      | .....      | .....      | .....      | .....      | .....      | .....      |
| PF10_0355_Kilifi_384         | ----       | .....A     | ....A...   | ....A...   | .....      | .....      | .....      | .....      |
| PF10_0355_Kilifi_406         | ----       | .....A     | ....A...   | ....A...   | .....      | .....      | .....      | .....      |
| <i>Plasmodium reichenowi</i> | ----.G...  | ....A..A   | ....A...   | ....GA..   | A.....     | .....A..   | .....      | .....      |

|                              | 650        | 660        | 670         | 680            | 690         | 700         | 710          | 720       |
|------------------------------|------------|------------|-------------|----------------|-------------|-------------|--------------|-----------|
| PF10_0355_3D7                | AATCTTTATG | TTTAAGAATT | ACATTACAAG  | ATTTTCGTAC     | GAAAAAGAAA  | AAGGAAGGAG  | ATTTTGAAAA   | ATTTATTAT |
| PF10_0355_Kilifi_019         | ..         | ..         | ..          | ..             | ..          | ..          | ..           | ..        |
| PF10_0355_Kilifi_020         | ..CAAA.G.. | ..T.....   | ..ATA..A.CA | .....C..A      | ATT...A...  | ..CT.....TA | ..A.....T..C | .....C    |
| PF10_0355_Kilifi_021         | .....      | .....      | .....       | .....          | .....       | .....       | .....        | .....     |
| PF10_0355_Kilifi_023         | .....      | .....      | .....       | .....          | .....       | .....       | .....        | .....     |
| PF10_0355_Kilifi_027         | .....      | .....      | .....       | .....          | .....       | .....       | .....        | .....     |
| PF10_0355_Kilifi_028         | .....      | .....      | .....       | .....          | .....       | .....       | .....        | .....     |
| PF10_0355_Kilifi_050         | .....      | .....      | .....       | .....          | .....       | .....       | .....        | .....     |
| PF10_0355_Kilifi_082         | ..T.....   | .....      | .....A      | .....G..A...   | ..A...      | ..CA.....   | .....        | .....     |
| PF10_0355_Kilifi_084         | .....      | .....      | .....       | .....          | .....       | .....       | .....        | .....     |
| PF10_0355_Kilifi_091         | .....      | .....      | .....       | .....          | .....       | .....       | .....        | .....     |
| PF10_0355_Kilifi_093         | .....      | .....      | .....       | .....          | .....       | .....       | .....        | .....     |
| PF10_0355_Kilifi_097         | .....      | .....      | .....A      | .....A.G..A... | ..A...      | ..CA.....   | .....        | .....     |
| PF10_0355_Kilifi_105         | .....      | .....      | .....       | .....          | .....       | .....       | .....        | .....     |
| PF10_0355_Kilifi_110         | ..CAAA.G.. | ..T.....   | ..ATA..A.CA | .....C..A      | ATT...A...  | ..CT.....TA | ..A.....T..C | .....C    |
| PF10_0355_Kilifi_124         | .....      | .....      | .....       | .....          | .....       | .....       | .....        | .....     |
| PF10_0355_Kilifi_128         | .....      | .....      | .....       | .....          | .....       | .....       | .....        | .....     |
| PF10_0355_Kilifi_150         | .....      | .....      | .....       | .....          | .....       | .....       | .....        | .....     |
| PF10_0355_Kilifi_160         | .....      | .....      | .....       | .....          | .....       | .....       | .....        | .....     |
| PF10_0355_Kilifi_162         | .....      | .....      | .....       | .....          | .....       | .....       | .....        | .....     |
| PF10_0355_Kilifi_164         | ..CAAA.G.. | ..T.....   | ..ATA..A.CA | .....C..A      | ATT...A...  | ..CT.....TA | ..A.....T..C | .....C    |
| PF10_0355_Kilifi_187         | .....      | .....      | .....       | .....          | .....       | .....       | .....        | .....     |
| PF10_0355_Kilifi_191         | .....      | .....      | .....       | .....          | .....       | .....       | .....        | .....     |
| PF10_0355_Kilifi_194         | .....      | .....      | .....       | .....          | .....       | .....       | .....        | .....     |
| PF10_0355_Kilifi_199         | ..CAAA.G.. | ..T.....   | ..ATA..A.CA | .....C..A      | ATT...A...  | ..CT.....TA | ..A.....T..C | .....C    |
| PF10_0355_Kilifi_201         | .....      | .....      | .....       | .....          | .....       | .....       | .....        | .....     |
| PF10_0355_Kilifi_202         | .....      | .....      | .....       | .....          | .....       | .....       | .....        | .....     |
| PF10_0355_Kilifi_214         | ..CAAA.G.. | ..T.....   | ..ATA..A.CA | .....C..A      | ATT...A...  | ..CT.....TA | ..A.....T..C | .....C    |
| PF10_0355_Kilifi_216         | .....      | .....      | .....       | .....          | .....       | .....       | .....        | .....     |
| PF10_0355_Kilifi_229         | .....      | .....      | .....       | .....          | .....       | .....       | .....        | .....     |
| PF10_0355_Kilifi_235         | .....      | .....      | .....       | .....          | .....       | .....       | .....        | .....     |
| PF10_0355_Kilifi_240         | .....      | .....      | .....       | .....          | .....       | .....       | .....        | .....     |
| PF10_0355_Kilifi_245         | .....      | .....      | .....       | .....          | .....       | .....       | .....        | .....     |
| PF10_0355_Kilifi_248         | .....      | .....      | .....       | .....          | .....       | .....       | .....        | .....     |
| PF10_0355_Kilifi_250         | ..T.....   | .....      | .....A      | .....G..A...   | ..A...      | ..CA.....   | .....        | .....     |
| PF10_0355_Kilifi_262         | .....      | .....      | .....       | .....          | .....       | .....       | .....        | .....     |
| PF10_0355_Kilifi_289         | .....      | .....      | .....       | .....          | .....       | .....       | .....        | .....     |
| PF10_0355_Kilifi_297         | .....      | .....      | .....       | .....          | .....       | .....       | .....        | .....     |
| PF10_0355_Kilifi_298         | .....      | .....      | .....       | .....          | .....       | .....       | .....        | .....     |
| PF10_0355_Kilifi_299         | .....      | .....      | .....       | .....          | .....       | .....       | .....        | .....     |
| PF10_0355_Kilifi_302         | ..T.....   | .....      | .....A      | .....G..A...   | ..A...      | ..CA.....   | .....        | .....     |
| PF10_0355_Kilifi_307         | .....      | .....      | .....       | .....          | .....       | .....       | .....        | .....     |
| PF10_0355_Kilifi_311         | ..CAAA.G.. | ..T.....   | ..ATA..A.CA | .....C..A      | ATT...A...  | ..CT.....TA | ..A.....T..C | .....C    |
| PF10_0355_Kilifi_314         | .....      | .....      | .....A      | .....A.G..A... | ..A...      | ..CA.....   | .....        | .....     |
| PF10_0355_Kilifi_319         | ..CAAA.G.. | ..T.....   | ..ATA..A.CA | .....C..A      | ATT...A...  | ..CT.....TA | ..A.....T..C | .....C    |
| PF10_0355_Kilifi_321         | .....      | .....      | .....       | .....          | .....       | .....       | .....        | .....     |
| PF10_0355_Kilifi_322         | .....      | .....      | .....       | .....          | .....       | .....       | .....        | .....     |
| PF10_0355_Kilifi_323         | .....      | .....      | .....       | .....          | .....       | .....       | .....        | .....     |
| PF10_0355_Kilifi_324         | .....      | .....      | .....       | .....          | .....       | .....       | .....        | .....     |
| PF10_0355_Kilifi_328         | .....      | .....      | .....       | .....          | .....       | .....       | .....        | .....     |
| PF10_0355_Kilifi_333         | ..T.....   | .....      | .....A      | .....G..A...   | ..A...      | ..CA.....   | .....        | .....     |
| PF10_0355_Kilifi_334         | ..CAAA.G.. | ..T.....   | ..ATA..A.CA | .....C..A      | ATT...A...  | ..CT.....TA | ..A.....T..C | .....C    |
| PF10_0355_Kilifi_336         | ..T.....   | .....      | .....A      | .....G.....    | .....C..... | .....       | .....        | .....     |
| PF10_0355_Kilifi_340         | ..CAAA.G.. | ..T.....   | ..ATA..A.CA | .....C..A      | ATT...A...  | ..CT.....TA | ..A.....T..C | .....C    |
| PF10_0355_Kilifi_343         | .....      | .....      | .....A      | .....G..A...   | ..A...      | .....       | .....        | .....     |
| PF10_0355_Kilifi_344         | ..CAAA.G.. | ..T.....   | ..ATA..A.CA | .....C..A      | ATT...A...  | ..CT.....TA | ..A.....T..C | .....C    |
| PF10_0355_Kilifi_345         | .....      | .....      | .....       | .....          | .....       | .....       | .....        | .....     |
| PF10_0355_Kilifi_349         | .....      | .....      | .....       | .....          | .....       | .....       | .....        | .....     |
| PF10_0355_Kilifi_356         | .....      | .....      | .....       | .....          | .....       | .....       | .....        | .....     |
| PF10_0355_Kilifi_359         | .....      | .....      | .....       | .....          | .....       | .....       | .....        | .....     |
| PF10_0355_Kilifi_364         | .....      | .....      | .....       | .....          | .....       | .....       | .....        | .....     |
| PF10_0355_Kilifi_365         | .....      | .....      | .....       | .....G.....    | .....       | .....       | .....        | .....     |
| PF10_0355_Kilifi_384         | .....      | .....      | .....       | .....          | .....       | .....       | .....        | .....     |
| PF10_0355_Kilifi_406         | .....      | .....      | .....       | .....          | .....       | .....       | .....        | .....     |
| <i>Plasmodium reichenowi</i> | ..T.....   | ..A.....   | .....A      | .....G..A.G... | ..A...      | ..CCA..ATG. | .....        | ..T.....  |





|                              | 890         | 900         | 910         | 920         | 930         | 940         | 950           | 960         |
|------------------------------|-------------|-------------|-------------|-------------|-------------|-------------|---------------|-------------|
| PF10_0355_3D7                | ..... ..... | ..... ..... | ..... ..... | ..... ..... | ..... ..... | ..... ..... | ..... .....   | ..... ..... |
| PF10_0355_Kilifi_019         | TAGAAAAAGT  | ACTTAAAT    | TATAATGAAA  | ATAATGATAA  | ACCAAAAAGAT | GCAAAAAAAT  | GGTGGACAGA    | AAACAGGCAT  |
| PF10_0355_Kilifi_020         | .G..G....   | ...CGG..AA  | C.AT..A...  | ..GT.A..G.  | T.....T...  | ..T...CC.   | .....TTC.     | .....AA...  |
| PF10_0355_Kilifi_021         | .....       | .....       | .....       | .....       | .....       | .....       | .....         | .....       |
| PF10_0355_Kilifi_023         | ....G....   | .....C..    | C....A...   | .....A--    | -A.....     | .....       | .....T...T..  | .....       |
| PF10_0355_Kilifi_027         | .....       | .....       | .....       | .....       | .....       | .....       | .....         | .....       |
| PF10_0355_Kilifi_028         | .....       | .....       | .....       | .....       | .....       | .....       | .....         | .....       |
| PF10_0355_Kilifi_050         | .....       | .....       | .....       | .....       | .....       | .....       | .....         | .....       |
| PF10_0355_Kilifi_082         | ....G....   | .....C..    | C....A...   | .....A--    | -A.....     | .....       | .....T...T..  | .....       |
| PF10_0355_Kilifi_084         | .....       | .....       | .....       | .....       | .....       | .....       | .....         | .....       |
| PF10_0355_Kilifi_091         | .....       | .....       | .....       | .....       | .....       | .....       | .....         | .....       |
| PF10_0355_Kilifi_093         | ....G....   | .....C..    | C....A...   | .....A--    | -A.....     | .....       | .....T...T..  | .....       |
| PF10_0355_Kilifi_097         | ....G....   | .....C..    | C....A...   | .....A--    | -A.....     | .....       | .....T...T..  | .....       |
| PF10_0355_Kilifi_105         | .....       | .....       | .....       | .....       | .....       | .....       | .....         | .....       |
| PF10_0355_Kilifi_110         | .G..G....   | ...CGG..AA  | C.AT..A...  | ..GT.A..G.  | T.....T...  | ..T...CC.   | .....TTC.     | .....AA...  |
| PF10_0355_Kilifi_124         | .....       | .....       | .....       | .....       | .....       | .....       | .....         | .....       |
| PF10_0355_Kilifi_128         | ....G....   | .....C..    | C....A...   | .....A--    | -A.....     | .....       | .....T...T..  | .....       |
| PF10_0355_Kilifi_150         | .....       | .....       | .....       | .....       | .....       | .....       | .....         | .....       |
| PF10_0355_Kilifi_160         | ....G....   | .....C..    | C....A...   | .....A--    | -A.....     | .....       | .....T...T..  | .....       |
| PF10_0355_Kilifi_162         | .....       | .....       | .....       | .....       | .....       | .....       | .....         | .....       |
| PF10_0355_Kilifi_164         | .G..G....   | ...CGG..AA  | C.AT..A...  | ..GT.A..G.  | T.....T...  | ..T...CC.   | .....TTC.     | .....AA...  |
| PF10_0355_Kilifi_187         | .....       | .....       | .....       | .....       | .....       | .....       | .....         | .....       |
| PF10_0355_Kilifi_191         | ....G....   | .....C..    | C....A...   | .....A--    | -A.....     | .....       | .....T...T..  | .....       |
| PF10_0355_Kilifi_194         | ....G....   | .....C..    | C....A...   | .....A--    | -A.....     | .....       | .....T...T..  | .....       |
| PF10_0355_Kilifi_199         | .G..G....   | ...CGG..AA  | C.AT..A...  | ..GT.A..G.  | T.....T...  | ..T...CC.   | .....TTC.     | .....AA...  |
| PF10_0355_Kilifi_201         | .....       | .....       | .....       | .....       | .....       | .....       | .....         | .....       |
| PF10_0355_Kilifi_202         | ....G....   | .....C..    | C....A...   | .....A--    | -A.....     | .....       | .....T...T..  | .....       |
| PF10_0355_Kilifi_214         | .G..G....   | ...CGG..AA  | C.AT..A...  | ..GT.A..G.  | T.....T...  | ..T...CC.   | .....TTC.     | .....AA...  |
| PF10_0355_Kilifi_216         | ....G....   | .....C..    | C....A...   | .....A--    | -A.....     | .....       | .....T...T..  | .....       |
| PF10_0355_Kilifi_229         | .....       | .....       | .....       | .....       | .....       | .....       | .....         | .....       |
| PF10_0355_Kilifi_235         | .....       | .....       | .....       | .....       | .....       | .....       | .....         | .....       |
| PF10_0355_Kilifi_240         | ....G....   | .....C..    | C....A...   | .....A--    | -A.....     | .....       | .....T...T..  | .....       |
| PF10_0355_Kilifi_245         | .....       | .....       | .....       | .....       | .....       | .....       | .....         | .....       |
| PF10_0355_Kilifi_248         | .....       | .....       | .....       | .....       | .....       | .....       | .....         | .....       |
| PF10_0355_Kilifi_250         | ....G....   | .....C..    | C....A...   | .....A--    | -A.....     | .....       | .....T...T..  | .....       |
| PF10_0355_Kilifi_262         | .....       | .....       | .....       | .....       | .....       | .....       | .....         | .....       |
| PF10_0355_Kilifi_289         | .....       | .....       | .....       | .....       | .....       | .....       | .....         | .....       |
| PF10_0355_Kilifi_297         | .....       | .....       | .....       | .....       | .....       | .....       | .....         | .....       |
| PF10_0355_Kilifi_298         | .....       | .....       | .....       | .....       | .....       | .....       | .....         | .....       |
| PF10_0355_Kilifi_299         | .....       | .....       | .....       | .....       | .....       | .....       | .....         | .....       |
| PF10_0355_Kilifi_302         | ....G....   | .....C..    | C....A...   | .....A--    | -A.....     | .....       | .....T...T..  | .....       |
| PF10_0355_Kilifi_307         | .....       | .....       | .....       | .....       | .....       | .....       | .....         | .....       |
| PF10_0355_Kilifi_311         | .G..G....   | ...CGG..AA  | C.AT..A...  | ..GT.A..G.  | T.....T...  | ..T...CC.   | .....TTC.     | .....AA...  |
| PF10_0355_Kilifi_314         | ....G....   | .....C..    | C....A...   | .....A--    | -A.....     | .....       | .....T...T..  | .....       |
| PF10_0355_Kilifi_319         | .G..G....   | ...CGG..AA  | C.T..A...   | ..GT.A..G.  | T.....T...  | ..T...CC.   | .....TTC.     | .....AA...  |
| PF10_0355_Kilifi_321         | ....G....   | .....C..    | C....A...   | .....A--    | -A.....     | .....       | .....T...T..  | .....       |
| PF10_0355_Kilifi_322         | .....       | .....       | .....       | .....       | .....       | .....       | .....         | .....       |
| PF10_0355_Kilifi_323         | ....G....   | .....C..    | C....A...   | .....A--    | -A.....     | .....       | .....T...T..  | .....       |
| PF10_0355_Kilifi_324         | .....       | .....       | .....       | .....       | .....       | .....       | .....         | .....       |
| PF10_0355_Kilifi_328         | .....       | .....       | .....       | .....       | .....       | .....       | .....         | .....       |
| PF10_0355_Kilifi_333         | ....G....   | .....C..    | C....A...   | .....A--    | -A.....     | .....       | .....T...T..  | .....       |
| PF10_0355_Kilifi_334         | .G..G....   | ...CGG..AA  | C.AT..A...  | ..G..A..G.  | T.....T...  | ..T...CC.   | .....TTC.     | .....AA...  |
| PF10_0355_Kilifi_336         | ....G....   | .....C..    | C....A...   | .....A--    | -A.....     | .....       | .....T...T..  | .....       |
| PF10_0355_Kilifi_340         | .G..G....   | ...CGG..AA  | C.AT..A...  | ..GT.A..G.  | T.....T...  | ..T...CC.   | .....TTC.     | .....AA...  |
| PF10_0355_Kilifi_343         | ....G....   | .....C..    | C....A...   | .....A--    | -A.....     | .....       | .....T...T..  | .....       |
| PF10_0355_Kilifi_344         | .G..G....   | ...CGG..AA  | C.AT..A...  | ..GT.A..G.  | T.....T...  | ..T...CC.   | .....TTC.     | .....AA...  |
| PF10_0355_Kilifi_345         | ....G....   | .....C..    | C....A...   | .....A--    | -A.....     | .....       | .....T...T..  | .....       |
| PF10_0355_Kilifi_349         | .....       | .....       | .....       | .....       | .....       | .....       | .....         | .....       |
| PF10_0355_Kilifi_356         | .....       | .....       | .....       | .....       | .....       | .....       | .....         | .....       |
| PF10_0355_Kilifi_359         | .....       | .....       | .....       | .....       | .....       | .....       | .....         | .....       |
| PF10_0355_Kilifi_364         | .....       | .....       | .....       | .....       | .....       | .....       | .....         | .....       |
| PF10_0355_Kilifi_365         | .....       | .....C..    | C....A...   | .....A--    | -A.....     | .....       | .....T...T..  | .....       |
| PF10_0355_Kilifi_384         | .....       | .....       | .....       | .....       | .....       | .....       | .....         | .....       |
| PF10_0355_Kilifi_406         | .....       | .....       | .....       | .....       | .....       | .....       | .....         | .....       |
| <i>Plasmodium reichenowi</i> | ....G....   | ....G..C..  | C....A...   | ..G..A--    | -G.....     | .....       | .....G..T.... | .....       |

|                              | 970        | 980        | 990        | 1000        | 1010        | 1020       | 1030       | 1040       |
|------------------------------|------------|------------|------------|-------------|-------------|------------|------------|------------|
| PF10_0355_3D7                | CATGTTTGGG | AAGCAATGAT | GTGCGGATAT | CAGAGTGC GC | AGAAAAGATAA | CCAATGTACA | GGTTATGGTA | ACATTGATGA |
| PF10_0355_Kilifi_019         | .G.....    | .T.....    | .....      | ..ATA..AAA  | .A.....     | TA.....    | ..A....C.  | .T..AT...  |
| PF10_0355_Kilifi_020         | .....      | .....      | .....      | .....       | .....       | .....      | .....      | .....      |
| PF10_0355_Kilifi_021         | .....      | .....      | .....      | .....       | .....       | .....      | .....      | .....      |
| PF10_0355_Kilifi_023         | .....      | .....      | .....      | ..A..A..A   | .A.....     | TG.....    | ..TA....C. | .T.....    |
| PF10_0355_Kilifi_027         | .....      | .....      | .....      | .....       | .....       | .....      | .....      | .....      |
| PF10_0355_Kilifi_028         | .....      | .....      | .....      | .....       | .....       | .....      | .....      | .....      |
| PF10_0355_Kilifi_050         | .....      | .....      | .....      | .....       | .....       | .....      | .....      | .....      |
| PF10_0355_Kilifi_082         | .....      | .....      | .....      | ..A..A..A   | .A.....     | TG.....    | ..TA....C. | .T.....    |
| PF10_0355_Kilifi_084         | .....      | .....      | .....      | .....       | .....       | .....      | .....      | .....      |
| PF10_0355_Kilifi_091         | .....      | .....      | .....      | .....       | .....       | .....      | .....      | .....      |
| PF10_0355_Kilifi_093         | .....      | .....      | .....      | ..A..A..A   | .A.....     | TG.....    | ..TA....C. | .T.....    |
| PF10_0355_Kilifi_097         | .....      | .....      | .....      | ..A..A..A   | .A.....     | TG.....    | ..TA....C. | .T.....    |
| PF10_0355_Kilifi_105         | .....      | .....      | .....      | .....       | .....       | .....      | .....      | .....      |
| PF10_0355_Kilifi_110         | .G.....    | .T.....    | .....      | ..ATA..AAA  | .A.....     | TA.....    | ..A....C.  | .T..AT...  |
| PF10_0355_Kilifi_124         | .....      | .....      | .....      | .....       | .....       | .....      | .....      | .....      |
| PF10_0355_Kilifi_128         | .....      | .....      | .....      | ..A..A..A   | .A.....     | TG.....    | ..TA....C. | .T.....    |
| PF10_0355_Kilifi_150         | .....      | .....      | .....      | .....       | .....       | .....      | .....      | .....      |
| PF10_0355_Kilifi_160         | .....      | .....      | .....      | ..A..A..A   | .A.....     | TG.....    | ..TA....C. | .T.....    |
| PF10_0355_Kilifi_162         | .....      | .....      | .....      | .....       | .....       | .....      | .....      | .....      |
| PF10_0355_Kilifi_164         | .G.....    | .T.....    | .....      | ..ATA..AAA  | .A.....     | TA.....    | ..A....C.  | .T..AT...  |
| PF10_0355_Kilifi_187         | .....      | .....      | .....      | .....       | .....       | .....      | .....      | .....      |
| PF10_0355_Kilifi_191         | .....      | .....      | .....      | ..A..A..A   | .A.....     | TG.....    | ..TA....C. | .T.....    |
| PF10_0355_Kilifi_194         | .....      | .....      | .....      | ..A..A..A   | .A.....     | TG.....    | ..TA....C. | .T.....    |
| PF10_0355_Kilifi_199         | .G.....    | .T.....    | .....      | ..ATA..AAA  | .A.....     | TA.....    | ..A....C.  | .T..AT...  |
| PF10_0355_Kilifi_201         | .....      | .....      | .....      | .....       | .....       | .....      | .....      | .....      |
| PF10_0355_Kilifi_202         | .....      | .....      | .....      | ..A..A..A   | .A.....     | TG.....    | ..TA....C. | .T.....    |
| PF10_0355_Kilifi_214         | .G.....    | .T.....    | .....      | ..ATA..AAA  | .A.....     | TA.....    | ..A....C.  | .T..AT...  |
| PF10_0355_Kilifi_216         | .....      | .....      | .....      | ..A..A..A   | .A.....     | TG.....    | ..TA....C. | .T.....    |
| PF10_0355_Kilifi_229         | .....      | .....      | .....      | .....       | .....       | .....      | .....      | .....      |
| PF10_0355_Kilifi_235         | .....      | .....      | .....      | .....       | .....       | .....      | .....      | .....      |
| PF10_0355_Kilifi_240         | .....      | .....      | .....      | ..A..A..A   | .A.....     | TG.....    | ..TA....C. | .T.....    |
| PF10_0355_Kilifi_245         | .....      | .....      | .....      | .....       | .....       | .....      | .....      | .....      |
| PF10_0355_Kilifi_248         | .....      | .....      | .....      | .....       | .....       | .....      | .....      | .....      |
| PF10_0355_Kilifi_250         | .....      | .....      | .....      | ..A..A..A   | .A.....     | TG.....    | ..TA....C. | .T.....    |
| PF10_0355_Kilifi_262         | .....      | .....      | .....      | .....       | .....       | .....      | .....      | .....      |
| PF10_0355_Kilifi_289         | .....      | .....      | .....      | .....       | .....       | .....      | .....      | .....      |
| PF10_0355_Kilifi_297         | .....      | .....      | .....      | .....       | .....       | .....      | .....      | .....      |
| PF10_0355_Kilifi_298         | .....      | .....      | .....      | .....       | .....       | .....      | .....      | .....      |
| PF10_0355_Kilifi_299         | .....      | .....      | .....      | .....       | .....       | .....      | .....      | .....      |
| PF10_0355_Kilifi_302         | .....      | .....      | .....      | ..A..A..A   | .A.....     | TG.....    | ..TA....C. | .T.....    |
| PF10_0355_Kilifi_307         | .....      | .....      | .....      | .....       | .....       | .....      | .....      | .....      |
| PF10_0355_Kilifi_311         | .G.....    | .T.....    | .....      | ..ATA..AAA  | .A.....     | TA.....    | ..A....C.  | .T..AT...  |
| PF10_0355_Kilifi_314         | .....      | .....      | .....      | ..A..A..A   | .A.....     | TG.....    | ..TA....C. | .T.....    |
| PF10_0355_Kilifi_319         | .G.....    | .T.....    | .....      | ..ATA..AAA  | .A.....     | TA.....    | ..A....C.  | .T..AT...  |
| PF10_0355_Kilifi_321         | .....      | .....      | .....      | ..A..A..A   | .A.....     | TG.....    | ..TA....C. | .T.....    |
| PF10_0355_Kilifi_322         | .....      | .....      | .....      | .....       | .....       | .....      | .....      | .....      |
| PF10_0355_Kilifi_323         | .....      | .....      | .....      | ..A..A..A   | .A.....     | TG.....    | ..TA....C. | .T.....    |
| PF10_0355_Kilifi_324         | .....      | .....      | .....      | .....       | .....       | .....      | .....      | .....      |
| PF10_0355_Kilifi_328         | .....      | .....      | .....      | ..C.....    | .....       | .....      | .....      | .....      |
| PF10_0355_Kilifi_333         | .....      | .....      | .....      | ..A..A..A   | .A.....     | TG.....    | ..TA....C. | .T.....    |
| PF10_0355_Kilifi_334         | .G.....    | .T.....    | .....      | ..ATA..AAA  | .A.....     | TA.....    | ..A....C.  | .T..AT...  |
| PF10_0355_Kilifi_336         | .....      | .....      | .....      | ..A..A..A   | .A.....     | TG.....    | ..TA....C. | .T.....    |
| PF10_0355_Kilifi_340         | .G.....    | .T.....    | .....      | ..ATA..AAA  | .A.....     | TA.....    | ..A....C.  | .T..AT...  |
| PF10_0355_Kilifi_343         | .....      | .....      | .....      | ..A..A..A   | .A.....     | TG.....    | ..TA....C. | .T.....    |
| PF10_0355_Kilifi_344         | .G.....    | .T.....    | .....      | ..ATA..AAA  | .A.....     | TA.....    | ..A....C.  | .T..AT...  |
| PF10_0355_Kilifi_345         | .....      | .....      | .....      | ..A..A..A   | .A.....     | TG.....    | ..TA....C. | .T.....    |
| PF10_0355_Kilifi_349         | .....      | .....      | .....      | .....       | .....       | .....      | .....      | .....      |
| PF10_0355_Kilifi_356         | .....      | .....      | .....      | .....       | .....       | .....      | .....      | .....      |
| PF10_0355_Kilifi_359         | .....      | .....      | .....      | .....       | .....       | .....      | .....      | .....      |
| PF10_0355_Kilifi_364         | .....      | .....      | .....      | .....       | .....       | .....      | .....      | .....      |
| PF10_0355_Kilifi_365         | .....      | .....      | .....      | ..A..A..A   | .A.....     | TG.....    | ..TA....C. | .T.....    |
| PF10_0355_Kilifi_384         | .....      | .....      | .....      | .....       | .....       | .....      | .....      | .....      |
| PF10_0355_Kilifi_406         | .....      | .....      | .....      | .....       | .....       | .....      | .....      | .....      |
| <i>Plasmodium reichenowi</i> | ...A...C.A | .....      | ..A.....   | ..A..A..A   | .A.....     | TG.....    | ..TA....C. | .T.....    |



|                              | 1050       | 1060       | 1070       | 1080       | 1090        | 1100       | 1110       | 1120       |
|------------------------------|------------|------------|------------|------------|-------------|------------|------------|------------|
| PF10_0355_3D7                | TATACCACAA | TTTTTAAGGT | GGTTCAGAGA | GTGGGGAACA | TATGTCTGTG  | AAGAAAGCGA | AAAAAATATG | AACACACTAA |
| PF10_0355_Kilifi_019         | .....      | .....      | .....      | .....      | .....       | .....      | .....      | .....      |
| PF10_0355_Kilifi_020         | .....      | ..C.....   | ....T....  | A.....T.   | .....       | .....      | .....      | .....      |
| PF10_0355_Kilifi_021         | .....      | .....      | .....      | .....      | .....       | .....      | .....      | .....      |
| PF10_0355_Kilifi_023         | .....      | .....      | ..T....    | .....      | ..G.....    | ..T.....   | ..G..T..   | .....      |
| PF10_0355_Kilifi_027         | .....      | .....      | .....      | .....      | .....       | .....      | .....      | .....      |
| PF10_0355_Kilifi_028         | .....      | .....      | .....      | .....      | .....       | ..T.....   | ..G..T..   | .....      |
| PF10_0355_Kilifi_050         | .....      | .....      | .....      | .....      | .....       | .....      | .....      | .....      |
| PF10_0355_Kilifi_082         | .....      | .....      | ..T....    | .....      | ..G.....    | ..T.....   | ..G..T..   | .....      |
| PF10_0355_Kilifi_084         | .....      | .....      | .....      | .....      | .....       | .....      | .....      | .....      |
| PF10_0355_Kilifi_091         | .....      | .....      | .....      | .....      | .....       | .....      | .....      | .....      |
| PF10_0355_Kilifi_093         | .....      | .....      | ..T....    | .....      | ..G.....    | ..T.....   | ..G..T..   | .....      |
| PF10_0355_Kilifi_097         | .....      | .....      | ..T....    | .....      | ..G.....    | ..T.....   | ..G..T..   | .....      |
| PF10_0355_Kilifi_105         | .....      | .....      | .....      | .....      | .....       | .....      | .....      | .....      |
| PF10_0355_Kilifi_110         | .....      | ..C.....   | ....T....  | A.....T.   | .....       | .....      | .....      | .....      |
| PF10_0355_Kilifi_124         | .....      | .....      | .....      | .....      | .....       | .....      | .....      | .....      |
| PF10_0355_Kilifi_128         | .....      | .....      | ..T....    | .....      | ..G.....    | ..T.....   | ..G..T..   | .....      |
| PF10_0355_Kilifi_150         | .....      | .....      | .....      | .....      | .....       | .....      | .....      | .....      |
| PF10_0355_Kilifi_160         | .....      | .....      | ..T....    | .....      | ..G.....    | ..T.....   | ..G..T..   | .....      |
| PF10_0355_Kilifi_162         | .....      | .....      | .....      | .....      | .....       | .....      | .....      | .....      |
| PF10_0355_Kilifi_164         | .....      | .....      | .....      | .....      | .....       | .....      | .....      | .....      |
| PF10_0355_Kilifi_187         | .....      | .....      | .....      | .....      | .....       | .....      | .....      | .....      |
| PF10_0355_Kilifi_191         | .....      | .....      | .....      | .....      | .....       | ..T.....   | ..G..T..   | .....      |
| PF10_0355_Kilifi_194         | .....      | .....      | ..T....    | .....      | ..G.....    | ..T.....   | ..G..T..   | .....      |
| PF10_0355_Kilifi_199         | .....      | ..C.....   | ....T....  | A.....T.   | .....       | .....      | .....      | .....      |
| PF10_0355_Kilifi_201         | .....      | .....      | .....      | .....      | .....       | .....      | .....      | .....      |
| PF10_0355_Kilifi_202         | .....      | .....      | ..T....    | .....      | ..G.....    | ..T.....   | ..G..T..   | .....      |
| PF10_0355_Kilifi_214         | .....      | .....      | .....      | .....      | .....       | .....      | .....      | .....      |
| PF10_0355_Kilifi_216         | .....      | .....      | ..T....    | .....      | ..G.....T.. | ..T.....   | ..G..T..   | .....      |
| PF10_0355_Kilifi_229         | .....      | .....      | .....      | .....      | .....       | .....      | .....      | .....      |
| PF10_0355_Kilifi_235         | .....      | .....      | .....      | .....      | .....       | .....      | .....      | .....      |
| PF10_0355_Kilifi_240         | .....      | .....      | ..T....    | .....      | ..G.....    | ..T.....   | ..G..T..   | .....      |
| PF10_0355_Kilifi_245         | .....      | .....      | .....      | .....      | .....       | .....      | .....      | .....      |
| PF10_0355_Kilifi_248         | .....      | .....      | .....      | .....      | .....       | .....      | .....      | .....      |
| PF10_0355_Kilifi_250         | .....      | .....      | ..T....    | .....      | ..G.....    | ..T.....   | ..G..T..   | .....      |
| PF10_0355_Kilifi_262         | .....      | .....      | .....      | .....      | .....       | .....      | .....      | .....      |
| PF10_0355_Kilifi_289         | .....      | .....      | .....      | .....      | .....       | .....      | .....      | .....      |
| PF10_0355_Kilifi_297         | .....      | .....      | .....      | .....      | .....       | .....      | .....      | .....      |
| PF10_0355_Kilifi_298         | .....      | .....      | .....      | .....      | .....       | .....      | .....      | .....      |
| PF10_0355_Kilifi_299         | .....      | .....      | .....      | .....      | .....       | ..T.....   | ..G..T..   | .....      |
| PF10_0355_Kilifi_302         | .....      | .....      | ..T....    | .....      | ..G.....    | ..T.....   | ..G..T..   | .....      |
| PF10_0355_Kilifi_307         | .....      | .....      | .....      | .....      | .....       | .....      | .....      | .....      |
| PF10_0355_Kilifi_311         | .....      | ..C.....   | ....T....  | A.....T.   | .....       | .....      | .....      | .....      |
| PF10_0355_Kilifi_314         | .....      | .....      | ..T....    | .....      | ..G.....    | ..T.....   | ..G..T..   | .....      |
| PF10_0355_Kilifi_319         | .....      | ..C.....   | ....T....  | A.....T.   | .....       | .....      | .....      | .....      |
| PF10_0355_Kilifi_321         | .....      | .....      | .....      | .....      | .....       | ..T.....   | ..G..T..   | .....      |
| PF10_0355_Kilifi_322         | .....      | .....      | .....      | .....      | .....       | .....      | .....      | .....      |
| PF10_0355_Kilifi_323         | .....      | .....      | ..T....    | .....      | ..G.....    | ..T.....   | ..G..T..   | .....      |
| PF10_0355_Kilifi_324         | .....      | .....      | .....      | .....      | .....       | .....      | .....      | .....      |
| PF10_0355_Kilifi_328         | .....      | .....      | .....      | .....      | .....       | .....      | .....      | .....      |
| PF10_0355_Kilifi_333         | .....      | .....      | ..T....    | .....      | ..G.....    | ..T.....   | ..G..T..   | .....      |
| PF10_0355_Kilifi_334         | .....      | ..C.....   | ....T....  | A.....T.   | .....       | .....      | .....      | .....      |
| PF10_0355_Kilifi_336         | .....      | .....      | .....      | .....      | ..G.....    | ..T.....   | ..G..T..   | .....      |
| PF10_0355_Kilifi_340         | .....      | ..C.....   | ....T....  | A.....T.   | .....       | .....      | .....      | .....      |
| PF10_0355_Kilifi_343         | .....      | .....      | ..T....    | .....      | ..G.....    | ..T.....   | ..G..T..   | .....      |
| PF10_0355_Kilifi_344         | .....      | ..C.....   | ....T....  | A.....T.   | .....       | .....      | .....      | .....      |
| PF10_0355_Kilifi_345         | .....      | .....      | ..T....    | .....      | ..G.....    | ..T.....   | ..G..T..   | .....      |
| PF10_0355_Kilifi_349         | .....      | .....      | .....      | .....      | .....       | .....      | .....      | .....      |
| PF10_0355_Kilifi_356         | .....      | .....      | .....      | .....      | .....       | .....      | .....      | .....      |
| PF10_0355_Kilifi_359         | .....      | .....      | .....      | .....      | .....       | .....      | .....      | .....      |
| PF10_0355_Kilifi_364         | .....      | .....      | .....      | .....      | .....       | .....      | .....      | .....      |
| PF10_0355_Kilifi_365         | .....      | .....      | .....      | .....      | .....       | ..T.....   | ..G..T..   | .....      |
| PF10_0355_Kilifi_384         | .....      | .....      | .....      | .....      | .....       | .....      | .....      | .....      |
| PF10_0355_Kilifi_406         | .....      | .....      | .....      | .....      | .....       | .....      | .....      | .....      |
| <i>Plasmodium reichenowi</i> | .....      | .....      | ..T....    | C..A...C.  | ..G.....    | ..T.....   | ..T..T..   | .....      |

|                              | 1130      | 1140      | 1150       | 1160       | 1170       | 1180       | 1190       | 1200       |
|------------------------------|-----------|-----------|------------|------------|------------|------------|------------|------------|
| PF10_0355_3D7                | AAGCTGTTG | CTTCCGAAA | CAGCCAAGAA | CCGAAGCGAA | TCCTGCATTG | ACTGTACATG | AAAATGAAAT | GTGCTCATCA |
| PF10_0355_Kilifi_019         |           |           |            |            |            |            |            |            |
| PF10_0355_Kilifi_020         |           |           |            |            |            |            |            |            |
| PF10_0355_Kilifi_021         |           |           |            |            |            |            |            |            |
| PF10_0355_Kilifi_023         |           | T...A...  | ...T...    | ...A...    | T...A..    | ...AC.C    | ...A.GT.C  |            |
| PF10_0355_Kilifi_027         |           |           |            |            |            |            |            |            |
| PF10_0355_Kilifi_028         |           | T...A...  | ...T...    | ...A...    | T...A..    | ...AC.C    | ...A.GT.C  |            |
| PF10_0355_Kilifi_050         |           |           |            |            |            |            |            |            |
| PF10_0355_Kilifi_082         |           | T...A...  | ...T...    | ...A...    | T...A..    | ...AC.C    | ...A.GT.C  |            |
| PF10_0355_Kilifi_084         |           |           |            |            |            |            |            |            |
| PF10_0355_Kilifi_091         |           |           |            |            |            |            |            |            |
| PF10_0355_Kilifi_093         |           | T...A...  | ...T...    | ...A...    | T...A..    | ...AC.C    | ...A.GT.C  |            |
| PF10_0355_Kilifi_097         |           | T...A...  | ...T...    | ...A...    | T...A..    | ...AC.C    | ...A.GT.C  |            |
| PF10_0355_Kilifi_105         |           |           |            |            |            |            |            |            |
| PF10_0355_Kilifi_110         |           |           |            |            |            |            |            |            |
| PF10_0355_Kilifi_124         |           |           |            |            |            |            |            |            |
| PF10_0355_Kilifi_128         |           | T...A...  | ...T...    | ...A...    | T...A..    | ...AC.C    | ...A.GT.C  |            |
| PF10_0355_Kilifi_150         |           |           |            |            |            |            |            |            |
| PF10_0355_Kilifi_160         |           | T...A...  | ...T...    | ...A...    | T...A..    | ...AC.C    | ...A.GT.C  |            |
| PF10_0355_Kilifi_162         |           |           |            |            |            |            |            |            |
| PF10_0355_Kilifi_164         |           |           |            |            |            |            |            |            |
| PF10_0355_Kilifi_187         |           |           |            |            |            |            |            |            |
| PF10_0355_Kilifi_191         |           | T...A...  | ...T...    | ...A...    | T...A..    | ...AC.C    | ...A.GT.C  |            |
| PF10_0355_Kilifi_194         |           | T...A...  | ...T...    | ...A...    | T...A..    | ...AC.C    | ...A.GT.C  |            |
| PF10_0355_Kilifi_199         |           |           |            |            |            |            |            |            |
| PF10_0355_Kilifi_201         |           |           |            |            |            |            |            |            |
| PF10_0355_Kilifi_202         |           | T...A...  | ...T...    | ...A...    | T...A..    | ...AC.C    | ...A.GT.C  |            |
| PF10_0355_Kilifi_214         |           |           |            |            |            |            |            |            |
| PF10_0355_Kilifi_216         |           | T...A...  | ...T...    | ...A...    | T...A..    | ...AC.C    | ...A.GT.C  |            |
| PF10_0355_Kilifi_229         |           |           |            |            |            |            |            |            |
| PF10_0355_Kilifi_235         |           |           |            |            |            |            |            |            |
| PF10_0355_Kilifi_240         |           | T...A...  | ...T...    | ...A...    | T...A..    | ...AC.C    | ...A.GT.C  |            |
| PF10_0355_Kilifi_245         |           |           |            |            |            |            |            |            |
| PF10_0355_Kilifi_248         |           |           |            |            |            |            |            |            |
| PF10_0355_Kilifi_250         |           | T...A...  | ...T...    | ...A...    | T...A..    | ...AC.C    | ...A.GT.C  |            |
| PF10_0355_Kilifi_262         |           |           |            |            |            |            |            |            |
| PF10_0355_Kilifi_289         |           |           |            |            |            |            |            |            |
| PF10_0355_Kilifi_297         |           |           |            |            |            |            |            |            |
| PF10_0355_Kilifi_298         |           |           |            |            |            |            |            |            |
| PF10_0355_Kilifi_299         |           | T...A...  | ...T...    | ...A...    | T...A..    | ...AC.C    | ...A.GT.C  |            |
| PF10_0355_Kilifi_302         |           | T...A...  | ...T...    | ...A...    | T...A..    | ...AC.C    | ...A.GT.C  |            |
| PF10_0355_Kilifi_307         |           |           |            |            |            |            |            |            |
| PF10_0355_Kilifi_311         |           |           |            |            |            |            |            |            |
| PF10_0355_Kilifi_314         |           | T...A...  | ...T...    | ...A...    | T...A..    | ...AC.C    | ...A.GT.C  |            |
| PF10_0355_Kilifi_319         |           |           |            |            |            |            |            |            |
| PF10_0355_Kilifi_321         |           | T...A...  | ...T...    | ...A...    | T...A..    | ...AC.C    | ...A.GT.C  |            |
| PF10_0355_Kilifi_322         |           |           |            |            |            |            |            |            |
| PF10_0355_Kilifi_323         |           | T...A...  | ...T...    | ...A...    | T...A..    | ...AC.C    | ...A.GT.C  |            |
| PF10_0355_Kilifi_324         |           |           |            |            |            |            |            |            |
| PF10_0355_Kilifi_328         |           |           |            |            |            |            |            |            |
| PF10_0355_Kilifi_333         |           | T...A...  | ...T...    | ...A...    | T...A..    | ...AC.C    | ...A.GT.C  |            |
| PF10_0355_Kilifi_334         |           |           |            |            |            |            |            |            |
| PF10_0355_Kilifi_336         |           | T...A...  | ...T...    | ...A...    | T...A..    | ...AC.C    | ...A.GT.C  |            |
| PF10_0355_Kilifi_340         |           |           |            |            |            |            |            |            |
| PF10_0355_Kilifi_343         |           | T...A...  | ...T...    | ...A...    | T...A..    | ...AC.C    | ...A.GT.C  |            |
| PF10_0355_Kilifi_344         |           |           |            |            |            |            |            |            |
| PF10_0355_Kilifi_345         |           | T...A...  | ...T...    | ...A...    | T...A..    | ...AC.C    | ...A.GT.C  |            |
| PF10_0355_Kilifi_349         |           |           |            |            |            |            |            |            |
| PF10_0355_Kilifi_356         |           |           |            |            |            |            |            |            |
| PF10_0355_Kilifi_359         |           |           |            |            |            |            |            |            |
| PF10_0355_Kilifi_364         |           |           |            |            |            |            |            |            |
| PF10_0355_Kilifi_365         |           | T...A...  | ...T...    | ...A...    | T...A..    | ...AC.C    | ...A.GT.C  |            |
| PF10_0355_Kilifi_384         |           |           |            |            |            |            |            |            |
| PF10_0355_Kilifi_406         |           |           |            |            |            |            |            |            |
| <i>Plasmodium reichenowi</i> |           | T...A...  | ...A...G   | T...A.A.   | ...T...    | ...A.TC..  | ...A.C.C   |            |

|                              | 1210       | 1220       | 1230       | 1240       | 1250       | 1260       | 1270       | 1280       |
|------------------------------|------------|------------|------------|------------|------------|------------|------------|------------|
| PF10_0355_3D7                | ACTTTAAAAA | AATATGAAGA | ATGGTATAAT | AAAAGGAAAA | CTGAATGGAC | TGAACAATCT | ---ATTAAAT | ATAACAATGA |
| PF10_0355_Kilifi_019         | .....      | .....      | .....      | .....      | .....      | .....      | ---        | .....      |
| PF10_0355_Kilifi_020         | .....      | .....      | .....      | .....      | .....      | .....      | ---        | .....      |
| PF10_0355_Kilifi_021         | .....      | .....      | .....      | .....      | .....      | .....      | ---        | .....      |
| PF10_0355_Kilifi_023         | .....      | .T.....    | .....      | .....      | A.....     | .....      | ---        | .....G..   |
| PF10_0355_Kilifi_027         | .....      | .....      | .....      | .....      | .....      | .....      | ---        | .....G..   |
| PF10_0355_Kilifi_028         | .....      | .T.....    | .....      | .....      | A.....     | .....      | ---        | .....G..   |
| PF10_0355_Kilifi_050         | .....      | .....      | .....      | .....      | .....      | .....      | ---        | .....G..   |
| PF10_0355_Kilifi_082         | .....      | .T.....    | .....      | .....      | A.....     | .....      | ATT        | .....G..   |
| PF10_0355_Kilifi_084         | .....      | .....      | .....      | .....      | .....      | .....      | ---        | .....G..   |
| PF10_0355_Kilifi_091         | .....      | .....      | .....      | .....      | .....      | .....      | ---        | .....G..   |
| PF10_0355_Kilifi_093         | .....      | .T.....    | .....      | .....      | A.....     | .....      | ---        | .....G..   |
| PF10_0355_Kilifi_097         | .....      | .T.....    | .....      | .....      | A.....     | .....      | ---        | .....G..   |
| PF10_0355_Kilifi_105         | .....      | .....      | .....      | .....      | .....      | .....      | ---        | .....G..   |
| PF10_0355_Kilifi_110         | .....      | .....      | .....      | .....      | .....      | .....      | ---        | .....G..   |
| PF10_0355_Kilifi_124         | .....      | .....      | .....      | .....      | .....      | .....      | ---        | .....G..   |
| PF10_0355_Kilifi_128         | .....      | .T.....    | .....      | .....      | A.....     | .....      | ---        | .....G..   |
| PF10_0355_Kilifi_150         | .....      | .....      | .....      | .....      | .....      | .....      | ---        | .....G..   |
| PF10_0355_Kilifi_160         | .....      | .T.....    | .....      | .....      | A.....     | .....      | ---        | .....G..   |
| PF10_0355_Kilifi_162         | .....      | .....      | .....      | .....      | .....      | .....      | ---        | .....G..   |
| PF10_0355_Kilifi_164         | .....      | .....      | .....      | .....      | .....      | .....      | ---        | .....G..   |
| PF10_0355_Kilifi_187         | .....      | .....      | .....      | .....      | .....      | .....      | ---        | .....G..   |
| PF10_0355_Kilifi_191         | .....      | .T.....    | .....      | .....      | A.....     | .....      | ---        | .....G..   |
| PF10_0355_Kilifi_194         | .....      | .T.....    | .....      | .....      | A.....     | .....      | ---        | .....G..   |
| PF10_0355_Kilifi_199         | .....      | .....      | .....      | .....      | .....      | .....      | ---        | .....G..   |
| PF10_0355_Kilifi_201         | .....      | .....      | .....      | .....      | .....      | .....      | ---        | .....G..   |
| PF10_0355_Kilifi_202         | .....      | .T.....    | .....      | .....      | A.....     | .....      | ---        | .....G..   |
| PF10_0355_Kilifi_214         | .....      | .....      | .....      | .....      | .....      | .....      | ---        | .....G..   |
| PF10_0355_Kilifi_216         | .....      | .T.....    | .....      | .....      | A.....     | .....      | ---        | .....G..   |
| PF10_0355_Kilifi_229         | .....      | .....      | .....      | .....      | .....      | .....      | ---        | .....G..   |
| PF10_0355_Kilifi_235         | .....      | .....      | .....      | .....      | .....      | .....      | ---        | .....G..   |
| PF10_0355_Kilifi_240         | .....      | .T.....    | .....      | .....      | A.....     | .....      | ---        | .....G..   |
| PF10_0355_Kilifi_245         | .....      | .....      | .....      | .....      | .....      | .....      | ---        | .....G..   |
| PF10_0355_Kilifi_248         | .....      | .....      | .....      | .....      | .....      | .....      | ---        | .....G..   |
| PF10_0355_Kilifi_250         | .....      | .T.....    | .....      | .....      | A.....     | .....      | ---        | .....G..   |
| PF10_0355_Kilifi_262         | .....      | .....      | .....      | .....      | .....      | .....      | ---        | .....G..   |
| PF10_0355_Kilifi_289         | .....      | .....      | .....      | .....      | .....      | .....      | ---        | .....G..   |
| PF10_0355_Kilifi_297         | .....      | .....      | .....      | .....      | .....      | .....      | ---        | .....G..   |
| PF10_0355_Kilifi_298         | .....      | .....      | .....      | .....      | .....      | .....      | ---        | .....G..   |
| PF10_0355_Kilifi_299         | .....      | .T.....    | .....      | .....      | A.....     | .....      | ---        | .....G..   |
| PF10_0355_Kilifi_302         | .....      | .T.....    | .....      | .....      | A.....     | .....      | ---        | .....G..   |
| PF10_0355_Kilifi_307         | .....      | .....      | .....      | .....      | .....      | .....      | ---        | .....G..   |
| PF10_0355_Kilifi_311         | .....      | .....      | .....      | .....      | .....      | .....      | ---        | .....G..   |
| PF10_0355_Kilifi_314         | .....      | .T.....    | .....      | .....      | A.....     | .....      | ---        | .....G..   |
| PF10_0355_Kilifi_319         | .....      | .....      | .....      | .....      | .....      | .....      | ---        | .....G..   |
| PF10_0355_Kilifi_321         | .....      | .T.....    | .....      | .....      | A.....     | .....      | ---        | .....G..   |
| PF10_0355_Kilifi_322         | .....      | .....      | .....      | .....      | .....      | .....      | ---        | .....G..   |
| PF10_0355_Kilifi_323         | .....      | .T.....    | .....      | .....      | A.....     | .....      | ---        | .....G..   |
| PF10_0355_Kilifi_324         | .....      | .....      | .....      | .....      | .....      | .....      | ---        | .....G..   |
| PF10_0355_Kilifi_328         | .....      | .....      | .....      | .....      | .....      | .....      | ---        | .....G..   |
| PF10_0355_Kilifi_333         | .....      | .T.....    | .....      | .....      | A.....     | .....      | ---        | .....G..   |
| PF10_0355_Kilifi_334         | .....      | .....      | .....      | .....      | .....      | .....      | ---        | .....G..   |
| PF10_0355_Kilifi_336         | .....      | .T.....    | .....      | .....      | A.....     | .....      | ---        | .....G..   |
| PF10_0355_Kilifi_340         | .....      | .....      | .....      | .....      | .....      | .....      | ---        | .....G..   |
| PF10_0355_Kilifi_343         | .....      | .T.....    | .....      | .....      | A.....     | .....      | ---        | .....G..   |
| PF10_0355_Kilifi_344         | .....      | .....      | .....      | .....      | .....      | .....      | ---        | .....G..   |
| PF10_0355_Kilifi_345         | .....      | .T.....    | .....      | .....      | A.....     | .....      | ---        | .....G..   |
| PF10_0355_Kilifi_349         | .....      | .....      | .....      | .....      | .....      | .....      | ---        | .....G..   |
| PF10_0355_Kilifi_356         | .....      | .....      | .....      | .....      | .....      | .....      | ---        | .....G..   |
| PF10_0355_Kilifi_359         | .....      | .....      | .....      | .....      | .....      | .....      | ---        | .....G..   |
| PF10_0355_Kilifi_364         | .....      | .....      | .....      | .....      | .....      | .....      | ---        | .....G..   |
| PF10_0355_Kilifi_365         | .....      | .T.....    | .....      | .....      | A.....     | .....      | ---        | .....G..   |
| PF10_0355_Kilifi_384         | .....      | .....      | .....      | .....      | .....      | .....      | ---        | .....G..   |
| PF10_0355_Kilifi_406         | .....      | .....      | .....      | .....      | .....      | .....      | ---        | .....G..   |
| <i>Plasmodium reichenowi</i> | .....      | .....      | .....      | .....      | A.....     | .....      | ---        | .....G..   |



|                              | 1370      | 1380       | 1390       | 1400      | 1410       | 1420       | 1430       | 1440       |
|------------------------------|-----------|------------|------------|-----------|------------|------------|------------|------------|
| PF10_0355_3D7                | .... .... | .... ....  | .... ....  | .... .... | .... ....  | .... ....  | .... ....  | .... ....  |
| PF10_0355_Kilifi_019         | --AAAAAAA | TTTGCAAGAT | GTATTGGAAC | TTACATTGA | TGGAAAAGCT | TTATTAGAAA | AGCTAAAAAA | AGAAGAATCA |
| PF10_0355_Kilifi_020         | --        |            |            |           |            |            |            |            |
| PF10_0355_Kilifi_021         | --        |            |            |           |            |            |            |            |
| PF10_0355_Kilifi_023         | --G.....  | .....C...  |            | A...T.... |            | .....A...  | .....G..G. |            |
| PF10_0355_Kilifi_027         | --        |            |            |           |            |            |            |            |
| PF10_0355_Kilifi_028         | --G.....  | .....C...  |            | A...T.... |            | .....A...  | .....G..G. |            |
| PF10_0355_Kilifi_050         | --        |            |            |           |            |            |            |            |
| PF10_0355_Kilifi_082         | --G.....  | .....C...  |            | A...T.... |            | .....A...  | .....G..G. |            |
| PF10_0355_Kilifi_084         | --        |            |            |           |            |            |            |            |
| PF10_0355_Kilifi_091         | --        |            |            |           |            |            |            |            |
| PF10_0355_Kilifi_093         | --G.....  | .....C...  |            | A...T.... |            | .....A...  | .....G..G. |            |
| PF10_0355_Kilifi_097         | --G.....  | .....C...  |            | A...T.... |            | .....A...  | .....G..G. |            |
| PF10_0355_Kilifi_105         | --        |            |            |           |            |            |            |            |
| PF10_0355_Kilifi_110         | --        |            |            |           |            |            |            |            |
| PF10_0355_Kilifi_124         | --        |            |            |           |            |            |            |            |
| PF10_0355_Kilifi_128         | --G.....  | .....C...  |            | A...T.... |            | .....A...  | .....G..G. |            |
| PF10_0355_Kilifi_150         | --        |            |            |           |            |            |            |            |
| PF10_0355_Kilifi_160         | --G.....  | .....C...  |            | A...T.... |            | .....A...  | .....G..G. |            |
| PF10_0355_Kilifi_162         | --        |            |            |           |            |            |            |            |
| PF10_0355_Kilifi_164         | --        |            |            |           |            |            |            |            |
| PF10_0355_Kilifi_187         | --        |            |            |           |            |            |            |            |
| PF10_0355_Kilifi_191         | --G.....  | .....C...  |            | A...T.... |            | .....A...  | .....G..G. |            |
| PF10_0355_Kilifi_194         | --G.....  | .....C...  |            | A...T.... |            | .....A...  | .....G..G. |            |
| PF10_0355_Kilifi_199         | --        |            |            |           |            |            |            |            |
| PF10_0355_Kilifi_201         | --        |            |            |           |            |            |            |            |
| PF10_0355_Kilifi_202         | --G.....  | .....C...  |            | A...T.... |            | .....A...  | .....G..G. |            |
| PF10_0355_Kilifi_214         | --        |            |            |           |            |            |            |            |
| PF10_0355_Kilifi_216         | --G.....  | .....C...  |            | A...T.... |            | .....A...  | .....G..G. |            |
| PF10_0355_Kilifi_229         | --        |            |            |           |            |            |            |            |
| PF10_0355_Kilifi_235         | --        |            |            |           |            |            |            |            |
| PF10_0355_Kilifi_240         | --G.....  | .....C...  |            | A...T.... |            | .....A...  | .....G..G. |            |
| PF10_0355_Kilifi_245         | --        |            |            |           |            |            |            |            |
| PF10_0355_Kilifi_248         | --        |            |            |           |            |            |            |            |
| PF10_0355_Kilifi_250         | --G.....  | .....C...  |            | A...T.... |            | .....A...  | .....G..G. |            |
| PF10_0355_Kilifi_262         | --        |            |            |           |            |            |            |            |
| PF10_0355_Kilifi_289         | --        |            |            |           |            |            |            |            |
| PF10_0355_Kilifi_297         | --        |            |            |           |            |            |            |            |
| PF10_0355_Kilifi_298         | --        |            |            |           |            |            |            |            |
| PF10_0355_Kilifi_299         | --G.....  | .....C...  |            | A...T.... |            | .....A...  | .....G..G. |            |
| PF10_0355_Kilifi_302         | --G.....  | .....C...  |            | A...T.... |            | .....A...  | .....G..G. |            |
| PF10_0355_Kilifi_307         | --        |            |            |           |            |            |            |            |
| PF10_0355_Kilifi_311         | --        |            |            |           |            |            |            |            |
| PF10_0355_Kilifi_314         | --G.....  | .....C...  |            | A...T.... |            | .....A...  | .....G..G. |            |
| PF10_0355_Kilifi_319         | --        |            |            |           |            |            |            |            |
| PF10_0355_Kilifi_321         | --G.....  | .....C...  |            | A...T.... |            | .....A...  | .....G..G. |            |
| PF10_0355_Kilifi_322         | --        |            |            |           |            |            |            |            |
| PF10_0355_Kilifi_323         | --G.....  | .....C...  |            | A...T.... |            | .....A...  | .....G..G. |            |
| PF10_0355_Kilifi_324         | --        |            |            |           |            |            |            |            |
| PF10_0355_Kilifi_328         | --        |            |            |           |            |            |            |            |
| PF10_0355_Kilifi_333         | --G.....  | .....C...  |            | A...T.... |            | .....A...  | .....G..G. |            |
| PF10_0355_Kilifi_334         | --        |            |            |           |            |            |            |            |
| PF10_0355_Kilifi_336         | --G.....  | .....C...  |            | A...T.... |            | .....A...  | .....G..G. |            |
| PF10_0355_Kilifi_340         | --        |            |            |           |            |            |            |            |
| PF10_0355_Kilifi_343         | --        |            |            |           |            |            |            |            |
| PF10_0355_Kilifi_344         | --        |            |            |           |            |            |            |            |
| PF10_0355_Kilifi_345         | --G.....  | .....C...  |            | A...T.... |            | .....A...  | .....G..G. |            |
| PF10_0355_Kilifi_349         | --        |            |            |           |            |            |            |            |
| PF10_0355_Kilifi_356         | --        |            |            |           |            |            |            |            |
| PF10_0355_Kilifi_359         | --        |            |            |           |            |            |            |            |
| PF10_0355_Kilifi_364         | --        |            |            |           |            |            |            |            |
| PF10_0355_Kilifi_365         | --G.....  | .....C...  |            | A...T.... |            | .....A...  | .....G..G. |            |
| PF10_0355_Kilifi_384         | --        |            |            |           |            |            |            |            |
| PF10_0355_Kilifi_406         | --        |            |            |           |            |            |            |            |
| <i>Plasmodium reichenowi</i> | AA.....   |            | A.....     |           | .A.....    |            | A.....     | G..G.....  |



|                              | 1530       | 1540       | 1550       | 1560        | 1570          | 1580       | 1590       | 1600       |
|------------------------------|------------|------------|------------|-------------|---------------|------------|------------|------------|
| PF10_0355_3D7                | ACAGGAAAAT | CAACCTGTTG | TAGAAACACC | TGTTACCACA  | GCTGTTATTA    | ATGAACATCA | AGGACAA--- | ---ACAGAAC |
| PF10_0355_Kilifi_019         | .....      | .....      | .....      | .....       | .....         | .....      | ---        | ---        |
| PF10_0355_Kilifi_020         | .....      | .....      | .....      | .....       | .....         | .....      | ---        | ---        |
| PF10_0355_Kilifi_021         | .....      | .....      | .....      | .....       | .....         | .....      | ---        | ---        |
| PF10_0355_Kilifi_023         | .....      | .....G..   | .....A..   | .....C..... | .....T.....G. | .....      | ---        | ---.C.T.   |
| PF10_0355_Kilifi_027         | .....      | .....      | .....      | .....       | .....         | .....      | ---        | ---        |
| PF10_0355_Kilifi_028         | .....      | .....G..   | .....A..   | .....C..... | .....T.....G. | .....      | ---        | ---.C.T.   |
| PF10_0355_Kilifi_050         | .....      | .....      | .....      | .....       | .....         | .....      | ---        | ---        |
| PF10_0355_Kilifi_082         | .....      | .....G..   | .....A..   | .....C..... | .....T.....G. | .....      | ---        | ---.C.T.   |
| PF10_0355_Kilifi_084         | .....      | .....      | .....      | .....       | .....         | .....      | ---        | ---        |
| PF10_0355_Kilifi_091         | .....      | .....      | .....      | .....       | .....         | .....      | ---        | ---        |
| PF10_0355_Kilifi_093         | .....      | .....G..   | .....A..   | .....C..... | .....T.....G. | .....      | ---        | ---.C.T.   |
| PF10_0355_Kilifi_097         | .....      | .....G..   | .....A..   | .....C..... | .....T.....G. | .....      | ---        | ---.C.T.   |
| PF10_0355_Kilifi_105         | .....      | .....      | .....      | .....       | .....         | .....      | ---        | ---        |
| PF10_0355_Kilifi_110         | .....      | .....      | .....      | .....       | .....         | .....      | ---        | ---        |
| PF10_0355_Kilifi_124         | .....      | .....      | .....      | .....       | .....         | .....      | ---        | ---        |
| PF10_0355_Kilifi_128         | .....      | .....G..   | .....A..   | .....C..... | .....T.....G. | .....      | ---        | ---.C.T.   |
| PF10_0355_Kilifi_150         | .....      | .....      | .....      | .....       | .....         | .....      | ---        | ---        |
| PF10_0355_Kilifi_160         | .....      | .....G..   | .....A..   | .....C..... | .....T.....G. | .....      | ---        | ---.C.T.   |
| PF10_0355_Kilifi_162         | .....      | .....      | .....      | .....       | .....         | .....      | ---        | ---        |
| PF10_0355_Kilifi_164         | .....      | .....      | .....      | .....       | .....         | .....      | ---        | ---        |
| PF10_0355_Kilifi_187         | .....      | .....      | .....      | .....       | .....         | .....      | ---        | ---        |
| PF10_0355_Kilifi_191         | .....      | .....G..   | .....A..   | .....C..... | .....T.....G. | .....      | ---        | ---.C.T.   |
| PF10_0355_Kilifi_194         | .....      | .....G..   | .....A..   | .....C..... | .....T.....G. | .....      | ---        | ---.C.T.   |
| PF10_0355_Kilifi_199         | .....      | .....      | .....      | .....       | .....         | .....      | ---        | ---        |
| PF10_0355_Kilifi_201         | .....      | .....      | .....      | .....       | .....         | .....      | ---        | ---        |
| PF10_0355_Kilifi_202         | .....      | .....G..   | .....A..   | .....C..... | .....T.....G. | .....      | ---        | ---.C.T.   |
| PF10_0355_Kilifi_214         | .....      | .....      | .....      | .....       | .....         | .....      | ---        | ---        |
| PF10_0355_Kilifi_216         | .....      | .....G..   | .....A..   | .....C..... | .....T.....G. | .....      | ---        | ---.C.T.   |
| PF10_0355_Kilifi_229         | .....      | .....      | .....      | .....       | .....         | .....      | ---        | ---        |
| PF10_0355_Kilifi_235         | .....      | .....      | .....      | .....       | .....         | .....      | ---        | ---        |
| PF10_0355_Kilifi_240         | .....      | .....G..   | .....A..   | .....C..... | .....T.....G. | .....      | ---        | ---.C.T.   |
| PF10_0355_Kilifi_245         | .....      | .....      | .....      | .....       | .....         | .....      | ---        | ---        |
| PF10_0355_Kilifi_248         | .....      | .....      | .....      | .....       | .....         | .....      | ---        | ---        |
| PF10_0355_Kilifi_250         | .....      | .....G..   | .....A..   | .....C..... | .....T.....G. | .....      | ---        | ---.C.T.   |
| PF10_0355_Kilifi_262         | .....      | .....      | .....      | .....       | .....         | .....      | ---        | ---        |
| PF10_0355_Kilifi_289         | .....      | .....      | .....      | .....       | .....         | .....      | ---        | ---        |
| PF10_0355_Kilifi_297         | .....      | .....      | .....      | .....       | .....         | .....      | ---        | ---        |
| PF10_0355_Kilifi_298         | .....      | .....      | .....      | .....       | .....         | .....      | ---        | ---        |
| PF10_0355_Kilifi_299         | .....      | .....G..   | .....A..   | .....C..... | .....T.....G. | .....      | ---        | ---.C.T.   |
| PF10_0355_Kilifi_302         | .....      | .....G..   | .....A..   | .....C..... | .....T.....G. | .....      | ---        | ---.C.T.   |
| PF10_0355_Kilifi_307         | .....      | .....      | .....      | .....       | .....         | .....      | ---        | ---        |
| PF10_0355_Kilifi_311         | .....      | .....      | .....      | .....       | .....         | .....      | ---        | ---        |
| PF10_0355_Kilifi_314         | .....      | .....G..   | .....A..   | .....C..... | .....T.....G. | .....      | ---        | ---.C.T.   |
| PF10_0355_Kilifi_319         | .....      | .....      | .....      | .....       | .....         | .....      | ---        | ---        |
| PF10_0355_Kilifi_321         | .....      | .....G..   | .....A..   | .....C..... | .....T.....G. | .....      | ---        | ---.C.T.   |
| PF10_0355_Kilifi_322         | .....      | .....      | .....      | .....       | .....         | .....      | ---        | ---        |
| PF10_0355_Kilifi_323         | .....      | .....G..   | .....A..   | .....C..... | .....T.....G. | .....      | ---        | ---.C.T.   |
| PF10_0355_Kilifi_324         | .....      | .....      | .....      | .....       | .....         | .....      | ---        | ---        |
| PF10_0355_Kilifi_328         | .....      | .....      | .....      | .....       | .....         | .....      | ---        | ---        |
| PF10_0355_Kilifi_333         | .....      | .....G..   | .....A..   | .....C..... | .....T.....G. | .....      | ---        | ---.C.T.   |
| PF10_0355_Kilifi_334         | .....      | .....      | .....      | .....       | .....         | .....      | ---        | ---        |
| PF10_0355_Kilifi_336         | .....      | .....G..   | .....A..   | .....C..... | .....T.....G. | .....      | ---        | ---.C.T.   |
| PF10_0355_Kilifi_340         | .....      | .....      | .....      | .....       | .....         | .....      | ---        | ---        |
| PF10_0355_Kilifi_343         | .....      | .....      | .....      | .....       | .....         | .....      | ---        | ---        |
| PF10_0355_Kilifi_344         | .....      | .....      | .....      | .....       | .....         | .....      | ---        | ---        |
| PF10_0355_Kilifi_345         | .....      | .....G..   | .....A..   | .....C..... | .....T.....G. | .....      | ---        | ---.C.T.   |
| PF10_0355_Kilifi_349         | .....      | .....      | .....      | .....       | .....         | .....      | ---        | ---        |
| PF10_0355_Kilifi_356         | .....      | .....      | .....      | .....       | .....         | .....      | ---        | ---        |
| PF10_0355_Kilifi_359         | .....      | .....      | .....      | .....       | .....         | .....      | ---        | ---        |
| PF10_0355_Kilifi_364         | .....      | .....      | .....      | .....       | .....         | .....      | ---        | ---        |
| PF10_0355_Kilifi_365         | .....      | .....G..   | .....A..   | .....C..... | .....T.....G. | .....      | ---        | ---.C.T.   |
| PF10_0355_Kilifi_384         | .....      | .....      | .....      | .....       | .....         | .....      | ---        | ---        |
| PF10_0355_Kilifi_406         | .....      | .....      | .....      | .....       | .....         | .....      | ---        | ---        |
| <i>Plasmodium reichenowi</i> | .G.....    | .T.G...G.. | .....T.    | ..A.....    | A.....CGG     | ...C.A.... | .A....AAA  | CAA.TCA... |

|                              | 1610       | 1620        | 1630       | 1640       | 1650       | 1660       | 1670       | 1680        |
|------------------------------|------------|-------------|------------|------------|------------|------------|------------|-------------|
| PF10_0355_3D7                | CGAATAAAGG | TGACAACAAT  | AATGAAAGAG | AAAATCATGA | AAGTAATGTT | GGTAGCATCC | AAGAAGTAAA | CCAAGGTAGC  |
| PF10_0355_Kilifi_019         | .....      | .....       | .....      | .....      | .....      | .....      | .....      | .....       |
| PF10_0355_Kilifi_020         | .....      | .....       | .....      | .....      | .....      | .....      | .....      | .....       |
| PF10_0355_Kilifi_021         | .....      | .....       | .....      | .....      | .....      | .....      | .....      | .....       |
| PF10_0355_Kilifi_023         | .A...C..A  | ...T...G.   | GG...G.C.  | ..C..A..A. | .....      | .....      | .....      | .....       |
| PF10_0355_Kilifi_027         | .....      | .....       | .....      | .....      | .....      | .....A.    | .....      | .....       |
| PF10_0355_Kilifi_028         | .A...C..A  | ...T...G.   | GG...G.C.  | ..C..A..A. | .....      | .....      | .....      | .....       |
| PF10_0355_Kilifi_050         | .....      | .....       | .....      | .....      | .....      | .....A.    | .....      | .....       |
| PF10_0355_Kilifi_082         | .A...C..A  | ...T...G.   | GG...G.C.  | ..C..A..A. | .....      | .....      | .....      | .....       |
| PF10_0355_Kilifi_084         | .....      | .....       | .....      | .....      | .....      | .....      | .....      | .....       |
| PF10_0355_Kilifi_091         | .....      | .....       | .....      | .....      | .....      | .....      | .....      | .....       |
| PF10_0355_Kilifi_093         | .A...C..A  | ...T...G.   | GG...G.C.  | ..C..A..A. | .....      | .....      | .....      | .....       |
| PF10_0355_Kilifi_097         | .A...C..A  | ...T...G.   | GG...G.C.  | ..C..A..A. | .....      | .....      | .....      | .....       |
| PF10_0355_Kilifi_105         | .....      | .....       | .....      | .....      | .....      | .....      | .....      | .....       |
| PF10_0355_Kilifi_110         | .....      | .....       | .....      | .....      | .....      | .....      | .....      | .....       |
| PF10_0355_Kilifi_124         | .....      | .....       | .....      | .....      | .....      | .....A.    | .....      | .....       |
| PF10_0355_Kilifi_128         | .A...C..A  | ...T...G.   | GG...G.C.  | ..C..A..A. | .....      | .....      | .....      | .....       |
| PF10_0355_Kilifi_150         | .....      | .....       | .....      | .....      | .....      | .....      | .....      | .....       |
| PF10_0355_Kilifi_160         | .A...C..A  | ...T...G.   | GG...G.C.  | ..C..A..A. | .....      | .....      | .....      | .....       |
| PF10_0355_Kilifi_162         | .....      | .....       | .....      | .....      | .....      | .....      | .....      | .....       |
| PF10_0355_Kilifi_164         | .....      | .....       | .....      | .....      | .....      | .....      | .....      | .....       |
| PF10_0355_Kilifi_187         | .....      | .....       | .....      | .....      | .....      | .....A.    | .....      | .....       |
| PF10_0355_Kilifi_191         | .A...C..A  | ...T...G.   | GG...G.C.  | ..C..A..A. | .....      | .....      | .....      | .....       |
| PF10_0355_Kilifi_194         | .A...C..A  | ...T...G.   | GG...G.C.  | ..C..A..A. | .....      | .....      | .....      | .....       |
| PF10_0355_Kilifi_199         | .....      | .....       | .....      | .....      | .....      | .....A.    | .....      | .....       |
| PF10_0355_Kilifi_201         | .....      | .....       | .....      | .....      | .....      | .....A.    | .....      | .....       |
| PF10_0355_Kilifi_202         | .A...C..A  | ...T...G.   | GG...G.C.  | ..C..A..A. | .....      | .....      | .....      | .....       |
| PF10_0355_Kilifi_214         | .....      | .....       | .....      | .....      | .....      | .....A.    | .....      | .....       |
| PF10_0355_Kilifi_216         | .A...C..A  | ...T...G.   | GG...G.C.  | ..C..A..A. | .....      | .....      | .....      | .....       |
| PF10_0355_Kilifi_229         | .....      | .....       | .....      | .....      | .....      | .....      | .....      | .....       |
| PF10_0355_Kilifi_235         | .....      | .....       | .....      | .....      | .....      | .....A.    | .....      | .....       |
| PF10_0355_Kilifi_240         | .A...C..A  | ...T...G.   | GG...G.C.  | ..C..A..A. | .....      | .....      | .....      | .....       |
| PF10_0355_Kilifi_245         | .....      | .....       | .....      | .....      | .....      | .....      | .....      | .....       |
| PF10_0355_Kilifi_248         | .....      | .....       | .....      | .....      | .....      | .....      | .....      | .....       |
| PF10_0355_Kilifi_250         | .A...C..A  | ...T...G.   | GG...G.C.  | ..C..A..A. | .....      | .....      | .....      | .....       |
| PF10_0355_Kilifi_262         | .....      | .....       | .....      | .....      | .....      | .....      | .....      | .....       |
| PF10_0355_Kilifi_289         | .....      | .....       | .....      | .....      | .....      | .....      | .....      | .....       |
| PF10_0355_Kilifi_297         | .....      | .....       | .....      | .....      | .....      | .....      | .....      | .....       |
| PF10_0355_Kilifi_298         | .....      | .....       | .....      | .....      | .....      | .....      | .....      | .....       |
| PF10_0355_Kilifi_299         | .A...C..A  | ...T...G.   | GG...G.C.  | ..C..A..A. | .....      | .....      | .....      | .....       |
| PF10_0355_Kilifi_302         | .A...C..A  | ...T...G.   | GG...G.C.  | ..C..A..A. | .....      | .....      | .....      | .....       |
| PF10_0355_Kilifi_307         | .....      | .....       | .....      | .....      | .....      | .....      | .....      | .....       |
| PF10_0355_Kilifi_311         | .....      | .....       | .....      | .....      | .....      | .....      | .....      | .....       |
| PF10_0355_Kilifi_314         | .A...C..A  | ...T...G.   | GG...G.C.  | ..C..A..A. | .....      | .....      | .....      | .....       |
| PF10_0355_Kilifi_319         | .....      | .....       | .....      | .....      | .....      | .....A.    | .....      | .....       |
| PF10_0355_Kilifi_321         | .A...C..A  | ...T...G.   | GG...G.C.  | ..C..A..A. | .....      | .....      | .....      | .....       |
| PF10_0355_Kilifi_322         | .....      | .....       | .....      | .....      | .....      | .....      | .....      | .....       |
| PF10_0355_Kilifi_323         | .A...C..A  | ...T...G.   | GG...G.C.  | ..C..A..A. | .....      | .....      | .....      | .....       |
| PF10_0355_Kilifi_324         | .A...C..A  | ...T...G.   | GG...G.C.  | ..C..A..A. | .....      | .....      | .....      | .....       |
| PF10_0355_Kilifi_328         | .....      | .....       | .....      | .....      | .....      | .....      | .....      | .....       |
| PF10_0355_Kilifi_333         | .A...C..A  | ...T...G.   | GG...G.C.  | ..C..A..A. | .....      | .....      | .....      | .....       |
| PF10_0355_Kilifi_334         | .....      | .....       | .....      | .....      | .....      | .....A.    | .....      | .....       |
| PF10_0355_Kilifi_336         | .A...C..A  | ...T...G.   | GG...G.C.  | ..C..A..A. | .....      | .....      | .....      | .....       |
| PF10_0355_Kilifi_340         | .....      | .....       | .....      | .....      | .....      | .....A.    | .....      | .....       |
| PF10_0355_Kilifi_343         | .....      | .....       | .....      | .....      | .....      | .....A.    | .....      | .....       |
| PF10_0355_Kilifi_344         | .....      | .....       | .....      | .....      | .....      | .....      | .....      | .....       |
| PF10_0355_Kilifi_345         | .A...C..A  | ...T...G.   | GG...G.C.  | ..C..A..A. | .....      | .....      | .....      | .....       |
| PF10_0355_Kilifi_349         | .....      | .....       | .....      | .....      | .....      | .....      | .....      | .....       |
| PF10_0355_Kilifi_356         | .....      | .....       | .....      | .....      | .....      | .....      | .....      | .....       |
| PF10_0355_Kilifi_359         | .....      | .....       | .....      | .....      | .....      | .....A.    | .....      | .....       |
| PF10_0355_Kilifi_364         | .....      | .....       | .....      | .....      | .....      | .....      | .....      | .....       |
| PF10_0355_Kilifi_365         | .A...C..A  | ...T...G.   | GG...G.C.  | ..C..A..A. | .....      | .....      | .....      | .....       |
| PF10_0355_Kilifi_384         | .....      | .....       | .....      | .....      | .....      | .....A.    | .....      | .....       |
| PF10_0355_Kilifi_406         | .....      | .....       | .....      | .....      | .....      | .....      | .....      | .....       |
| <i>Plasmodium reichenowi</i> | .T...C..A. | ...TG..A.G. | .....C.C   | ..C..A..A. | .....      | .....T..G. | .....      | .....T..... |





|                              | 1770       | 1780         | 1790        | 1800          | 1810       | 1820       | 1830          | 1840       |
|------------------------------|------------|--------------|-------------|---------------|------------|------------|---------------|------------|
| PF10_0355_3D7                | TCTTGAACAA | CACTCTAAGG   | AAGATGTAAA  | AAAGGGATG-    | TGCTTTAGAA | TTGGTACCTT | TATCTTTATC    | GGATATTGAA |
| PF10_0355_Kilifi_019         | .....      | .....        | .....       | .....A-       | .....      | .....      | .....         | .....      |
| PF10_0355_Kilifi_020         | .....      | .....        | .....       | .....A-       | .....      | .....      | .....         | .....      |
| PF10_0355_Kilifi_021         | .....      | .....        | .....       | .....A-       | .....      | .....      | .....         | .....      |
| PF10_0355_Kilifi_023         | .....      | .....        | .....       | .....A-       | .....      | .....      | .....         | .....      |
| PF10_0355_Kilifi_027         | .....      | .....        | .....       | .....A-       | .....      | .....      | .....         | .....      |
| PF10_0355_Kilifi_028         | .....      | .....        | .....       | .....A-       | .....      | .....      | .....         | .....      |
| PF10_0355_Kilifi_050         | .....      | .....        | .....       | .....A-       | .....      | .....      | .....         | .....      |
| PF10_0355_Kilifi_082         | .....      | .....        | .....       | .....A-       | .....      | .....      | .....         | .....      |
| PF10_0355_Kilifi_084         | .....      | .....        | .....       | .....A-       | .....      | .....      | .....         | .....      |
| PF10_0355_Kilifi_091         | .....      | .....        | .....       | .....A-       | .....      | .....      | .....         | .....      |
| PF10_0355_Kilifi_093         | .....      | .....        | .....       | .....A-       | .....      | .....      | .....         | .....      |
| PF10_0355_Kilifi_097         | .....      | .....        | .....       | .....A-       | .....      | .....      | .....         | .....      |
| PF10_0355_Kilifi_105         | .....      | .....        | .....       | .....A-       | .....      | .....      | .....         | .....      |
| PF10_0355_Kilifi_110         | .....      | .....        | .....       | .....A-       | .....      | .....      | .....         | .....      |
| PF10_0355_Kilifi_124         | .....      | .....        | .....       | .....A-       | .....      | .....      | .....         | .....      |
| PF10_0355_Kilifi_128         | .....      | .....        | .....       | .....A-       | A.....     | .....      | .....         | .....      |
| PF10_0355_Kilifi_150         | .....      | .....        | .....       | .....A-       | .....      | .....      | .....         | .....      |
| PF10_0355_Kilifi_160         | .....      | .....        | .....       | .....A-       | .....      | .....      | .....         | .....      |
| PF10_0355_Kilifi_162         | .....      | .....        | .....       | .....A-       | .....      | .....      | .....         | .....      |
| PF10_0355_Kilifi_164         | .....      | .....        | .....       | .....A-       | .....      | .....      | .....         | .....      |
| PF10_0355_Kilifi_187         | .....      | .....        | .....       | .....A-       | .....      | .....      | .....         | .....      |
| PF10_0355_Kilifi_191         | .....      | .....        | .....       | .....A-       | .....      | .....      | .....         | .....      |
| PF10_0355_Kilifi_194         | .....      | .....        | .....       | .....A-       | .....      | .....      | .....         | .....      |
| PF10_0355_Kilifi_199         | .....      | .....        | .....       | .....A-       | .....      | .....      | .....         | .....      |
| PF10_0355_Kilifi_201         | .....      | .....        | .....       | .....A-       | .....      | .....      | .....         | .....      |
| PF10_0355_Kilifi_202         | .....      | .....        | .....       | .....A-       | .....      | .....      | .....         | .....      |
| PF10_0355_Kilifi_214         | .....      | .....        | .....       | .....A-       | .....      | .....      | .....         | .....      |
| PF10_0355_Kilifi_216         | .....      | .....        | .....       | .....A-       | A.....     | .....      | .....         | .....      |
| PF10_0355_Kilifi_229         | .....      | .....        | .....       | .....A-       | .....      | .....      | .....         | .....      |
| PF10_0355_Kilifi_235         | .....      | .....        | .....       | .....A-       | .....      | .....      | .....         | .....      |
| PF10_0355_Kilifi_240         | .....      | .....        | .....       | .....A-       | .....      | .....      | .....         | .....      |
| PF10_0355_Kilifi_245         | .....      | .....        | .....       | .....A-       | .....      | .....      | .....         | .....      |
| PF10_0355_Kilifi_248         | .....      | .....        | .....       | .....A-       | .....      | .....      | .....         | .....      |
| PF10_0355_Kilifi_250         | .....      | .....        | .....       | .....A-       | .....      | .....      | .....         | .....      |
| PF10_0355_Kilifi_262         | .....      | .....        | .....       | .....A-       | .....      | .....      | .....         | .....      |
| PF10_0355_Kilifi_289         | .....      | .....        | .....       | .....A-       | .....      | .....      | .....         | .....      |
| PF10_0355_Kilifi_297         | .....      | .....        | .....       | .....A-       | .....      | .....      | .....         | .....      |
| PF10_0355_Kilifi_298         | .....      | .....        | .....       | .....A-       | .....      | .....      | .....         | .....      |
| PF10_0355_Kilifi_299         | .....      | .....        | .....       | .....A-       | .....      | .....      | .....         | .....      |
| PF10_0355_Kilifi_302         | .....      | .....        | .....       | .....A-       | .....      | .....      | .....         | .....      |
| PF10_0355_Kilifi_307         | .....      | .....        | .....       | .....A-       | .....      | .....      | .....         | .....      |
| PF10_0355_Kilifi_311         | .....      | .....        | .....       | .....A-       | .....      | .....      | .....         | .....      |
| PF10_0355_Kilifi_314         | .....      | .....        | .....       | .....A-       | A.....     | .....      | .....         | .....      |
| PF10_0355_Kilifi_319         | .....      | .....        | .....       | .....A-       | A.....     | .....      | .....         | .....      |
| PF10_0355_Kilifi_321         | .....      | .....        | .....       | .....A-       | .....      | .....      | .....         | .....      |
| PF10_0355_Kilifi_322         | .....      | .....        | .....       | .....A-       | .....      | .....      | .....         | .....      |
| PF10_0355_Kilifi_323         | .....      | .....        | .....       | .....A-       | .....      | .....      | .....         | .....      |
| PF10_0355_Kilifi_324         | .....      | .....        | .....       | .....A-       | .....      | .....      | .....         | .....      |
| PF10_0355_Kilifi_328         | .....      | .....        | .....       | .....A-       | .....      | .....      | .....         | .....      |
| PF10_0355_Kilifi_333         | .....      | .....        | .....       | .....A-       | .....      | .....      | .....         | .....      |
| PF10_0355_Kilifi_334         | .....      | .....        | .....       | .....A-       | A.....     | .....      | .....         | .....      |
| PF10_0355_Kilifi_336         | .....      | .....        | .....       | .....A-       | .....      | .....      | .....         | .....      |
| PF10_0355_Kilifi_340         | .....      | .....        | .....       | .....A-       | .....      | .....      | .....         | .....      |
| PF10_0355_Kilifi_343         | .....      | .....        | .....       | .....A-       | .....      | .....      | .....         | .....      |
| PF10_0355_Kilifi_344         | .....      | .....        | .....       | .....A-       | .....      | .....      | .....         | .....      |
| PF10_0355_Kilifi_345         | .....      | .....        | .....       | .....A-       | .....      | .....      | .....         | .....      |
| PF10_0355_Kilifi_349         | .....      | .....        | .....       | .....A-       | .....      | .....      | .....         | .....      |
| PF10_0355_Kilifi_356         | .....      | .....        | .....       | .....A-       | .....      | .....      | .....         | .....      |
| PF10_0355_Kilifi_359         | .....      | .....        | .....       | .....A-       | .....      | .....      | .....         | .....      |
| PF10_0355_Kilifi_364         | .....      | .....        | .....       | .....A-       | .....      | .....      | .....         | .....      |
| PF10_0355_Kilifi_365         | .....      | .....        | .....       | .....A-       | .....      | .....      | .....         | .....      |
| PF10_0355_Kilifi_384         | .....      | .....        | .....       | .....A-       | .....      | .....      | .....         | .....      |
| PF10_0355_Kilifi_406         | .....      | .....        | .....       | .....A-       | .....      | .....      | .....         | .....      |
| <i>Plasmodium reichenowi</i> | .....      | .....GA..... | .....A..... | .....AAA..... | .....      | .....      | .....A.A..... | .....      |

|                              | 1850       | 1860       | 1870       | 1880       | 1890       | 1900       | 1910       | 1920       |
|------------------------------|------------|------------|------------|------------|------------|------------|------------|------------|
| PF10_0355_3D7                | CAGATAGCTA | ATGAAAGCGA | AGATGTACTG | GAAGAGATAG | AAGAAGAAAT | TAATACAGAT | GGGGAAATAG | AATATATAAC |
| PF10_0355_Kilifi_019         |            |            |            |            |            |            |            |            |
| PF10_0355_Kilifi_020         |            |            |            |            |            |            |            |            |
| PF10_0355_Kilifi_021         |            |            |            |            |            |            |            |            |
| PF10_0355_Kilifi_023         |            |            |            |            |            |            |            |            |
| PF10_0355_Kilifi_027         |            |            |            |            |            |            |            |            |
| PF10_0355_Kilifi_028         |            |            |            |            |            |            |            |            |
| PF10_0355_Kilifi_050         |            |            |            |            |            |            |            |            |
| PF10_0355_Kilifi_082         |            |            |            |            |            |            |            |            |
| PF10_0355_Kilifi_084         |            |            |            |            |            |            |            |            |
| PF10_0355_Kilifi_091         |            |            |            |            |            |            |            |            |
| PF10_0355_Kilifi_093         |            |            |            |            |            |            |            |            |
| PF10_0355_Kilifi_097         |            |            |            |            |            |            |            |            |
| PF10_0355_Kilifi_105         |            |            |            |            |            |            |            |            |
| PF10_0355_Kilifi_110         |            |            |            |            |            |            |            |            |
| PF10_0355_Kilifi_124         |            |            |            |            |            |            |            |            |
| PF10_0355_Kilifi_128         |            |            |            |            |            |            |            |            |
| PF10_0355_Kilifi_150         |            |            |            |            |            |            |            |            |
| PF10_0355_Kilifi_160         |            |            |            |            |            |            |            |            |
| PF10_0355_Kilifi_162         |            |            |            |            |            |            |            |            |
| PF10_0355_Kilifi_164         |            |            |            |            |            |            |            |            |
| PF10_0355_Kilifi_187         |            |            |            |            |            |            |            |            |
| PF10_0355_Kilifi_191         |            |            |            |            |            |            |            |            |
| PF10_0355_Kilifi_194         |            |            |            |            |            |            |            |            |
| PF10_0355_Kilifi_199         |            |            |            |            |            |            |            |            |
| PF10_0355_Kilifi_201         |            |            |            |            |            |            |            |            |
| PF10_0355_Kilifi_202         |            |            |            |            |            |            |            |            |
| PF10_0355_Kilifi_214         |            |            |            |            |            |            |            |            |
| PF10_0355_Kilifi_216         |            |            |            |            |            |            |            |            |
| PF10_0355_Kilifi_229         |            |            |            |            |            |            |            |            |
| PF10_0355_Kilifi_235         |            |            |            |            |            |            |            |            |
| PF10_0355_Kilifi_240         |            |            |            |            |            |            |            |            |
| PF10_0355_Kilifi_245         |            |            |            |            |            |            |            |            |
| PF10_0355_Kilifi_248         |            |            |            |            |            |            |            |            |
| PF10_0355_Kilifi_250         |            |            |            |            |            |            |            |            |
| PF10_0355_Kilifi_262         |            |            |            |            |            |            |            |            |
| PF10_0355_Kilifi_289         |            |            |            |            |            |            |            |            |
| PF10_0355_Kilifi_297         |            |            |            |            |            |            |            |            |
| PF10_0355_Kilifi_298         |            |            |            |            |            |            |            |            |
| PF10_0355_Kilifi_299         |            |            |            |            |            |            |            |            |
| PF10_0355_Kilifi_302         |            |            |            |            |            |            |            |            |
| PF10_0355_Kilifi_307         |            |            |            |            |            |            |            |            |
| PF10_0355_Kilifi_311         |            |            |            |            |            |            |            |            |
| PF10_0355_Kilifi_314         |            |            |            |            |            |            |            |            |
| PF10_0355_Kilifi_319         |            |            |            |            |            |            |            |            |
| PF10_0355_Kilifi_321         |            |            |            |            |            |            |            |            |
| PF10_0355_Kilifi_322         |            |            |            |            |            |            |            |            |
| PF10_0355_Kilifi_323         |            |            |            |            |            |            |            |            |
| PF10_0355_Kilifi_324         |            |            |            |            |            |            |            |            |
| PF10_0355_Kilifi_328         |            |            |            |            |            |            |            |            |
| PF10_0355_Kilifi_333         |            |            |            |            |            |            |            |            |
| PF10_0355_Kilifi_334         |            |            |            |            |            |            |            |            |
| PF10_0355_Kilifi_336         |            |            |            |            |            |            |            |            |
| PF10_0355_Kilifi_340         |            |            |            |            |            |            |            |            |
| PF10_0355_Kilifi_343         |            |            |            |            |            |            |            |            |
| PF10_0355_Kilifi_344         |            |            |            |            |            |            |            |            |
| PF10_0355_Kilifi_345         |            |            |            |            |            |            |            |            |
| PF10_0355_Kilifi_349         |            |            |            |            |            |            |            |            |
| PF10_0355_Kilifi_356         |            |            |            |            |            |            |            |            |
| PF10_0355_Kilifi_359         |            |            |            |            |            |            |            |            |
| PF10_0355_Kilifi_364         |            |            |            |            |            |            |            |            |
| PF10_0355_Kilifi_365         |            |            |            |            |            |            |            |            |
| PF10_0355_Kilifi_384         |            |            |            |            |            |            |            |            |
| PF10_0355_Kilifi_406         |            |            |            |            |            |            |            |            |
| <i>Plasmodium reichenowi</i> |            |            |            | T          |            |            |            | GA         |



|                      | 2010       | 2020      | 2030       | 2040       | 2050       | 2060       | 2070       | 2080       |
|----------------------|------------|-----------|------------|------------|------------|------------|------------|------------|
| PF10_0355_3D7        | AAACAGAAGA | AGAA----- | -----      | -----GC    | AGATGAAGAA | ACAGTAAAAG | AAATAGAAGA | CAAACCAGAA |
| PF10_0355_Kilifi_019 | .....      | -----     | -----      | -----      | -----      | -----      | -----      | -----      |
| PF10_0355_Kilifi_020 | .....      | -----     | -----      | -----      | -----      | -----      | -----      | -----      |
| PF10_0355_Kilifi_021 | .....      | ACAGAA    | GAAGAA---  | -----      | -----      | -----      | T.....     | -----      |
| PF10_0355_Kilifi_023 | .....      | ACAGAA    | GAAGAA---  | -----      | -----      | -----      | -----      | -----      |
| PF10_0355_Kilifi_027 | .....      | -----     | -----      | -----      | -----      | -----      | -----      | -----      |
| PF10_0355_Kilifi_028 | .....      | -----     | -----      | -----      | -----      | -----      | -----      | -----      |
| PF10_0355_Kilifi_050 | .....      | ACAGAA    | GAAGAA---  | -----      | -----      | -----      | T.....     | -----      |
| PF10_0355_Kilifi_082 | .....      | -----     | -----      | -----      | -----      | -----      | -----      | -----      |
| PF10_0355_Kilifi_084 | .....      | ACAGAA    | GAAGAA---  | -----      | -----      | -----      | T.....     | -----      |
| PF10_0355_Kilifi_091 | .....      | -----     | -----      | -----      | -----      | -----      | -----      | -----      |
| PF10_0355_Kilifi_093 | .....      | -----     | -----      | -----      | -----      | -----      | -----      | -----      |
| PF10_0355_Kilifi_097 | .....      | ACAGAA    | GAAGAA---  | -----      | -----      | -----      | -----      | -----      |
| PF10_0355_Kilifi_105 | .....      | ACAGAA    | GAAGAA---  | -----      | ACAGAA     | GAAGAA---  | T.....     | -----      |
| PF10_0355_Kilifi_110 | .....      | ACAGAA    | GAAGAA---  | -----      | -----      | -----      | -----      | -----      |
| PF10_0355_Kilifi_124 | .....      | -----     | -----      | -----      | -----      | -----      | -----      | -----      |
| PF10_0355_Kilifi_128 | .....      | -----     | -----      | -----      | -----      | -----      | -----      | -----      |
| PF10_0355_Kilifi_150 | .....      | -----     | -----      | -----      | -----      | -----      | -----      | -----      |
| PF10_0355_Kilifi_160 | .....      | ACAGAA    | GAAGAA---  | -----      | -----      | -----      | -----      | -----      |
| PF10_0355_Kilifi_162 | .....      | ACAGAA    | GAAGAA---  | -----      | ACAGAA     | GAAGAA---  | T.....     | -----      |
| PF10_0355_Kilifi_164 | .....      | -----     | -----      | -----      | -----      | -----      | -----      | -----      |
| PF10_0355_Kilifi_187 | .....      | ACAGAA    | GAAGAA---  | -----      | -----      | -----      | T.....     | -----      |
| PF10_0355_Kilifi_191 | .....      | -----     | -----      | -----      | -----      | -----      | -----      | -----      |
| PF10_0355_Kilifi_194 | .....      | -----     | -----      | -----      | -----      | -----      | T.....     | -----      |
| PF10_0355_Kilifi_199 | .....      | -----     | -----      | -----      | -----      | -----      | T.....     | -----      |
| PF10_0355_Kilifi_201 | .....      | -----     | -----      | -----      | -----      | -----      | -----      | -----      |
| PF10_0355_Kilifi_202 | .....      | ACAGAA    | GAAGAA---  | -----      | -----      | -----      | -----      | -----      |
| PF10_0355_Kilifi_214 | .....      | -----     | -----      | -----      | -----      | -----      | T.....     | -----      |
| PF10_0355_Kilifi_216 | .....      | -----     | -----      | -----      | -----      | -----      | -----      | -----      |
| PF10_0355_Kilifi_229 | .....      | ACAGAA    | GAAGAA---  | -----      | -----      | -----      | -----      | -----      |
| PF10_0355_Kilifi_235 | .....      | ACAGAA    | GAAGAA---  | -----      | -----      | -----      | -----      | -----      |
| PF10_0355_Kilifi_240 | .....      | -----     | -----      | -----      | -----      | -----      | T.....     | -----      |
| PF10_0355_Kilifi_245 | .....      | -----     | -----      | -----      | -----      | -----      | -----      | -----      |
| PF10_0355_Kilifi_248 | .....      | ACAGAA    | GAAGAA---  | -----      | -----      | -----      | T.....     | -----      |
| PF10_0355_Kilifi_250 | .....      | -----     | -----      | -----      | -----      | -----      | -----      | -----      |
| PF10_0355_Kilifi_262 | .....      | -----     | -----      | -----      | -----      | -----      | -----      | -----      |
| PF10_0355_Kilifi_289 | .....      | -----     | -----      | -----      | -----      | -----      | -----      | -----      |
| PF10_0355_Kilifi_297 | .....      | ACAGAA    | GAAGAA---  | -----      | -----      | -----      | T.....     | -----      |
| PF10_0355_Kilifi_298 | .....      | ACAGAA    | GAAGAA---  | -----      | -----      | -----      | -----      | -----      |
| PF10_0355_Kilifi_299 | .....      | ACAGAA    | GAAGAA---  | -----      | -----      | -----      | -----      | -----      |
| PF10_0355_Kilifi_302 | .....      | -----     | -----      | -----      | -----      | -----      | -----      | -----      |
| PF10_0355_Kilifi_307 | .....      | ACAGAA    | GAAGAA---  | -----      | -----      | -----      | T.....     | -----      |
| PF10_0355_Kilifi_311 | .....      | -----     | -----      | -----      | -----      | -----      | -----      | -----      |
| PF10_0355_Kilifi_314 | .....      | ACAGAA    | GAAGAA---  | -----      | -----      | -----      | -----      | -----      |
| PF10_0355_Kilifi_319 | .....      | -----     | -----      | -----      | -----      | -----      | -----      | -----      |
| PF10_0355_Kilifi_321 | .....      | -----     | -----      | -----      | -----      | -----      | -----      | -----      |
| PF10_0355_Kilifi_322 | .....      | ACAGAA    | GAAGAA---  | -----      | -----      | -----      | -----      | -----      |
| PF10_0355_Kilifi_323 | .....      | -----     | -----      | -----      | -----      | A.G...     | -----      | G.....     |
| PF10_0355_Kilifi_324 | .....      | ACAGAA    | GAAGAA---  | -----      | -----      | -----      | T.....     | -----      |
| PF10_0355_Kilifi_328 | .....      | ACAGAA    | GAAGAA---  | -----      | -----      | -----      | -----      | -----      |
| PF10_0355_Kilifi_333 | .....      | -----     | -----      | -----      | -----      | -----      | -----      | -----      |
| PF10_0355_Kilifi_334 | .....      | -----     | -----      | -----      | -----      | -----      | -----      | -----      |
| PF10_0355_Kilifi_336 | .....      | ACAGAA    | GAAGAA---  | -----      | -----      | -----      | -----      | -----      |
| PF10_0355_Kilifi_340 | .....      | -----     | -----      | -----      | -----      | -----      | -----      | -----      |
| PF10_0355_Kilifi_343 | .....      | ACAGAA    | GAAGAA---  | -----      | -----      | -----      | -----      | -----      |
| PF10_0355_Kilifi_344 | .....      | ACAGAA    | GAAGAA---  | -----      | -----      | -----      | -----      | -----      |
| PF10_0355_Kilifi_345 | .....      | -----     | -----      | -----      | -----      | -----      | T.....     | -----      |
| PF10_0355_Kilifi_349 | .....      | ACAGAA    | GAAGAA---  | -----      | -----      | -----      | -----      | -----      |
| PF10_0355_Kilifi_356 | .....      | -----     | -----      | -----      | -----      | -----      | -----      | -----      |
| PF10_0355_Kilifi_359 | .....      | -----     | -----      | -----      | -----      | -----      | G.....     | -----      |
| PF10_0355_Kilifi_364 | .....      | ACAGAA    | GAAGAA---  | -----      | -----      | -----      | T.....     | -----      |
| PF10_0355_Kilifi_365 | .....      | -----     | -----      | -----      | -----      | -----      | -----      | -----      |
| PF10_0355_Kilifi_384 | .....      | ACAGAA    | GAAGAA---  | -----      | -----      | -----      | -----      | -----      |
| PF10_0355_Kilifi_406 | .....      | ACAGAA    | GAAGAAACAG | AAGAAGAA.. | -----      | -----      | T.....     | -----      |

*Plasmodium reichenowi*

-----C.....T.....









....|....| ....|....| ....|...  
GATATTACAA ATTTATTAA AAATTA

PF10\_0355\_3D7  
PF10\_0355\_Kilifi\_019  
PF10\_0355\_Kilifi\_020  
PF10\_0355\_Kilifi\_021  
PF10\_0355\_Kilifi\_023  
PF10\_0355\_Kilifi\_027  
PF10\_0355\_Kilifi\_028  
PF10\_0355\_Kilifi\_050  
PF10\_0355\_Kilifi\_082  
PF10\_0355\_Kilifi\_084  
PF10\_0355\_Kilifi\_091  
PF10\_0355\_Kilifi\_093  
PF10\_0355\_Kilifi\_097  
PF10\_0355\_Kilifi\_105  
PF10\_0355\_Kilifi\_110  
PF10\_0355\_Kilifi\_124  
PF10\_0355\_Kilifi\_128  
PF10\_0355\_Kilifi\_150  
PF10\_0355\_Kilifi\_160  
PF10\_0355\_Kilifi\_162  
PF10\_0355\_Kilifi\_164  
PF10\_0355\_Kilifi\_187  
PF10\_0355\_Kilifi\_191  
PF10\_0355\_Kilifi\_194  
PF10\_0355\_Kilifi\_199  
PF10\_0355\_Kilifi\_201  
PF10\_0355\_Kilifi\_202  
PF10\_0355\_Kilifi\_214  
PF10\_0355\_Kilifi\_216  
PF10\_0355\_Kilifi\_229  
PF10\_0355\_Kilifi\_235  
PF10\_0355\_Kilifi\_240  
PF10\_0355\_Kilifi\_245  
PF10\_0355\_Kilifi\_248  
PF10\_0355\_Kilifi\_250  
PF10\_0355\_Kilifi\_262  
PF10\_0355\_Kilifi\_289  
PF10\_0355\_Kilifi\_297  
PF10\_0355\_Kilifi\_298  
PF10\_0355\_Kilifi\_299  
PF10\_0355\_Kilifi\_302  
PF10\_0355\_Kilifi\_307  
PF10\_0355\_Kilifi\_311  
PF10\_0355\_Kilifi\_314  
PF10\_0355\_Kilifi\_319  
PF10\_0355\_Kilifi\_321  
PF10\_0355\_Kilifi\_322  
PF10\_0355\_Kilifi\_323  
PF10\_0355\_Kilifi\_324  
PF10\_0355\_Kilifi\_328  
PF10\_0355\_Kilifi\_333  
PF10\_0355\_Kilifi\_334  
PF10\_0355\_Kilifi\_336  
PF10\_0355\_Kilifi\_340  
PF10\_0355\_Kilifi\_343  
PF10\_0355\_Kilifi\_344  
PF10\_0355\_Kilifi\_345  
PF10\_0355\_Kilifi\_349  
PF10\_0355\_Kilifi\_356  
PF10\_0355\_Kilifi\_359  
PF10\_0355\_Kilifi\_364  
PF10\_0355\_Kilifi\_365  
PF10\_0355\_Kilifi\_384  
PF10\_0355\_Kilifi\_406  
*Plasmodium reichenowi*
