# Supplementary figures and images for: Allele Frequency–Based and Polymorphism-Versus-Divergence Indices of Balancing Selection in a New Filtered Set of Polymorphic Genes in Plasmodium falciparum
Source: PubMed Central journal article supplement — Mol Biol Evol. 2010 May 9;27(10):2344–51. doi: 10.1093/molbev/msq119 (PMC2944029; doi:10.1093/molbev/msq119), 2010-05-09

Supplementary Figure 3

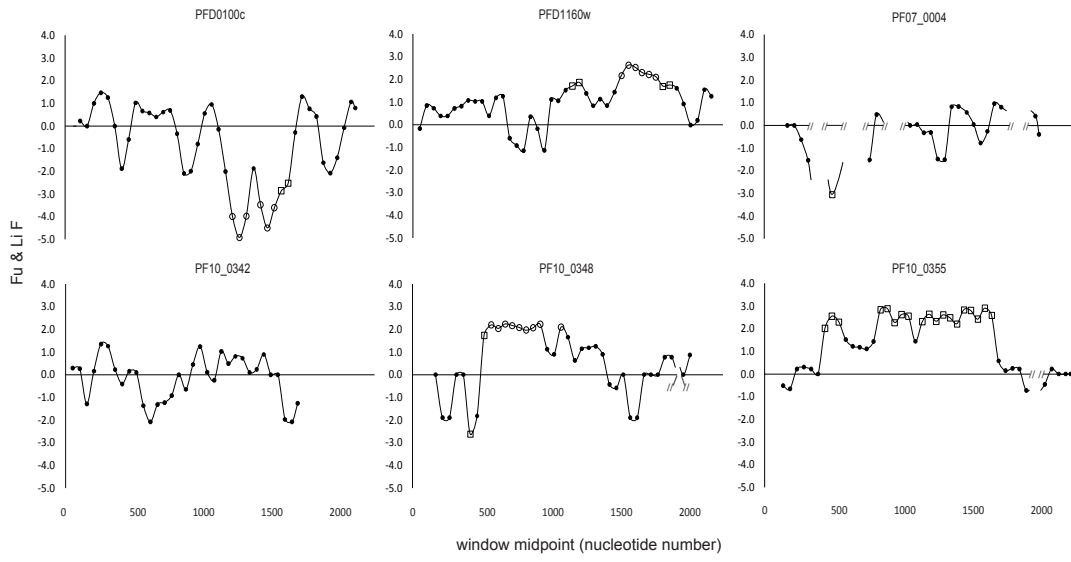

Supplement: supp_msq119_mbe-10-0161-File009.pdf [file supp_msq119_mbe-10-0161-File009.pdf]
